# Supplementary material for: Spatial transcriptomic and single-nucleus analysis reveals heterogeneity in a gigantic single-celled syncytium
Source: eLife. 2022 Feb 23;11:e69745. doi: 10.7554/eLife.69745 (PMC8865844; doi:10.7554/eLife.69745)
Supplement: Supplementary file 1. [file elife-69745-supp1.xlsx]

## Sheet: Sheet1
Name	Experiment	Life	Read-out	Batches	Chemistry	Technical	Growth conditions
		Stage				Replicates
SM1	Spatial Transcriptomics	Plasmodium	Single 384 well plate grids – bulk mRNA	Same starting culture	SmartSeq2	No replicates	No oat supplied
SM2
SM3							Oat supplied
SM4
T1			Handpicked pieces – bulk mRNA	Same starting culture
T2
T3
Primary	snRNA-seq		Single-nucleus mRNA	Same plasmo-dium sampled twice	10x Genomics	Lane 1	No oat supplied
						Lane 2
Secondary						Fan*	Oat supplied
						Network*
Amoeba	scRNA-seq	Amoeba	Single-cell mRNA	Same amoeba culture		Lane 1	Liquid culture
						Lane 2
* No replicates for Fan and Network samples
