# Supplementary material for: Spatial transcriptomic and single-nucleus analysis reveals heterogeneity in a gigantic single-celled syncytium
Source: eLife. 2022 Feb 23;11:e69745. doi: 10.7554/eLife.69745 (PMC8865844; doi:10.7554/eLife.69745)
Supplement: Supplementary file 3. — Excel sheets containing sampling information, sequencing library pooling scheme, and metadata such as grid coordinates and sequencing depth per grid. Sequencing depth is provided as the number of paired reads per grid, and only the grids that are analyzed in the article are listed on sheet 3. [file elife-69745-supp3.xlsx]

## Sheet: SM2
	1	2	3	4	5	6	7	8	9	10	11	12	13	14	15	16	17	18	19	20	21	22	23	24
A
B
C	Collected manually
D	BEFORE spinning
E
F
G
H
I
J
K
L
M
N
O
P
PLATE 1														PLATE 2
	1	2	3	4	5	6	7	8	9	10	11	12			1	2	3	4	5	6	7	8	9	10	11	12
A	A1	M8	A9	D9	E10	H10	I11	L11	M12	A13	D13	E14		A	E15	E16	E17	E18	E19	E20	C21	A22	H22	F23	D24
B	B1	B8	C9	F9	G10	J10	K11	N11	B12	C13	F13	G14		B	G15	G16	G17	G18	G19	G20	E21	C22	A23	H23	F24
C	A8	D8	E9	H9	I10	L10	M11	A12	D12	E13	H13	B14		C	B15	B16	B17	B18	B19	I20	G21	E22	C23	A24	H24
D	C8	F8	G9	J9	K10	N10	B11	C12	F12	G13	J13	D14		D	D15	D16	D17	D18	D19	B20	I21	G22	E23	C24
E	E8	H8	I9	L9	M10	A11	D11	E12	H12	I13	L13	F14		E	F15	F16	F17	F18	F19	D20	B21	I22	G23	E24
F	G8	J8	K9	N9	B10	C11	F11	G12	J12	K13	N13	H14		F	H15	H16	H17	H18	H19	F20	D21	B22	I23	G24
G	I8	L8	M9	A10	D10	E11	H11	I12	L12	M13	A14	A15		G	A16	A17	A18	A19	A20	H20	F21	D22	B23	I24
H	K8	N8	B9	C10	F10	G11	J11	K12	N12	B13	C14	C15		H	C16	C17	C18	C19	C20	A21	H21	F22	D23	B24
Nextera library indexing with primer sets A and B in order to sequence as a pool
PLATE 1 seq lib pool GER063														PLATE 2 seq lib pool GER063
	1	2	3	4	5	6	7	8	9	10	11	12			1	2	3	4	5	6	7	8	9	10	11	12
A	A1B	M8B	A9B	D9B	E10B	H10B	I11B	L11B	M12B	A13B	D13B	E14B		A	E15A	E16A	E17A	E18A	E19A	E20A	C21A	A22A	H22A	F23A	D24A
B	B1B	B8B	C9B	F9B	G10B	J10B	K11B	N11B	B12B	C13B	F13B	G14B		B	G15A	G16A	G17A	G18A	G19A	G20A	E21A	C22A	A23A	H23A	F24A
C	A8B	D8B	E9B	H9B	I10B	L10B	M11B	A12B	D12B	E13B	H13B	B14B		C	B15A	B16A	B17A	B18A	B19A	I20A	G21A	E22A	C23A	A24A	H24A
D	C8B	F8B	G9B	J9B	K10B	N10B	B11B	C12B	F12B	G13B	J13B	D14B		D	D15A	D16A	D17A	D18A	D19A	B20A	I21A	G22A	E23A	C24A
E	E8B	H8B	I9B	L9B	M10B	A11B	D11B	E12B	H12B	I13B	L13B	F14B		E	F15A	F16A	F17A	F18A	F19A	D20A	B21A	I22A	G23A	E24A
F	G8B	J8B	K9B	N9B	B10B	C11B	F11B	G12B	J12B	K13B	N13B	H14B		F	H15A	H16A	H17A	H18A	H19A	F20A	D21A	B22A	I23A	G24A
G	I8B	L8B	M9B	A10B	D10B	E11B	H11B	I12B	L12B	M13B	A14B	A15B		G	A16A	A17A	A18A	A19A	A20A	H20A	F21A	D22A	B23A	I24A
H	K8B	N8B	B9B	C10B	F10B	G11B	J11B	K12B	N12B	B13B	C14B	C15B		H	C16A	C17A	C18A	C19A	C20A	A21A	H21A	F22A	D23A	B24A

## Sheet: SM2_Grid
384_Plate_Position	96_Plate_Number	96_Plate_Position	Grid_Coordinates
A1	1	A1	C15
B1	1	B1	D15
A8	1	C1	A14
C8	1	D1	A12
E8	1	E1	A10
G8	1	F1	A8
I8	1	G1	A6
K8	1	H1	A4
M8	1	A2	A2
B8	1	B2	A13
D8	1	C2	A11
F8	1	D2	A9
H8	1	E2	A7
J8	1	F2	A5
L8	1	G2	A3
N8	1	H2	A1
A9	1	A3	B14
C9	1	B3	B12
E9	1	C3	B10
G9	1	D3	B8
I9	1	E3	B6
K9	1	F3	B4
M9	1	G3	B2
B9	1	H3	B13
D9	1	A4	B11
F9	1	B4	B9
H9	1	C4	B7
J9	1	D4	B5
L9	1	E4	B3
N9	1	F4	B1
A10	1	G4	C14
C10	1	H4	C12
E10	1	A5	C10
G10	1	B5	C8
I10	1	C5	C6
K10	1	D5	C4
M10	1	E5	C2
B10	1	F5	C13
D10	1	G5	C11
F10	1	H5	C9
H10	1	A6	C7
J10	1	B6	C5
L10	1	C6	C3
N10	1	D6	C1
A11	1	E6	D14
C11	1	F6	D12
E11	1	G6	D10
G11	1	H6	D8
I11	1	A7	D6
K11	1	B7	D4
M11	1	C7	D2
B11	1	D7	D13
D11	1	E7	D11
F11	1	F7	D9
H11	1	G7	D7
J11	1	H7	D5
L11	1	A8	D3
N11	1	B8	D1
A12	1	C8	E14
C12	1	D8	E12
E12	1	E8	E10
G12	1	F8	E8
I12	1	G8	E6
K12	1	H8	E4
M12	1	A9	E2
B12	1	B9	E13
D12	1	C9	E11
F12	1	D9	E9
H12	1	E9	E7
J12	1	F9	E5
L12	1	G9	E3
N12	1	H9	E1
A13	1	A10	F14
C13	1	B10	F12
E13	1	C10	F10
G13	1	D10	F8
I13	1	E10	F6
K13	1	F10	F4
M13	1	G10	F2
B13	1	H10	F13
D13	1	A11	F11
F13	1	B11	F9
H13	1	C11	F7
J13	1	D11	F5
L13	1	E11	F3
N13	1	F11	F1
A14	1	G11	G14
C14	1	H11	G12
E14	1	A12	G10
G14	1	B12	G8
B14	1	C12	G13
D14	1	D12	G11
F14	1	E12	G9
H14	1	F12	G7
A15	1	G12	H14
C15	1	H12	H12
E15	2	A1	H10
G15	2	B1	H8
B15	2	C1	H13
D15	2	D1	H11
F15	2	E1	H9
H15	2	F1	H7
A16	2	G1	I14
C16	2	H1	I12
E16	2	A2	I10
G16	2	B2	I8
B16	2	C2	I13
D16	2	D2	I11
F16	2	E2	I9
H16	2	F2	I7
A17	2	G2	J14
C17	2	H2	J12
E17	2	A3	J10
G17	2	B3	J8
B17	2	C3	J13
D17	2	D3	J11
F17	2	E3	J9
H17	2	F3	J7
A18	2	G3	K14
C18	2	H3	K12
E18	2	A4	K10
G18	2	B4	K8
B18	2	C4	K13
D18	2	D4	K11
F18	2	E4	K9
H18	2	F4	K7
A19	2	G4	L14
C19	2	H4	L12
E19	2	A5	L10
G19	2	B5	L8
B19	2	C5	L13
D19	2	D5	L11
F19	2	E5	L9
H19	2	F5	L7
A20	2	G5	M14
C20	2	H5	M12
E20	2	A6	M10
G20	2	B6	M8
I20	2	C6	M6
B20	2	D6	M13
D20	2	E6	M11
F20	2	F6	M9
H20	2	G6	M7
A21	2	H6	N14
C21	2	A7	N12
E21	2	B7	N10
G21	2	C7	N8
I21	2	D7	N6
B21	2	E7	N13
D21	2	F7	N11
F21	2	G7	N9
H21	2	H7	N7
A22	2	A8	O14
C22	2	B8	O12
E22	2	C8	O10
G22	2	D8	O8
I22	2	E8	O6
B22	2	F8	O13
D22	2	G8	O11
F22	2	H8	O9
H22	2	A9	O7
A23	2	B9	P14
C23	2	C9	P12
E23	2	D9	P10
G23	2	E9	P8
I23	2	F9	P6
B23	2	G9	P13
D23	2	H9	P11
F23	2	A10	P9
H23	2	B10	P7
A24	2	C10	Q14
C24	2	D10	Q12
E24	2	E10	Q10
G24	2	F10	Q8
I24	2	G10	Q6
B24	2	H10	Q13
D24	2	A11	Q11
F24	2	B11	Q9
H24	2	C11	Q7

## Sheet: SM2_Coordinates
Well_ID	Spatial_1	Spatial_2	reads
BSS2_A10_plate2_P9	16	9	151699
BSS2_A10_plate1_F14	6	14	1201243
BSS2_A11_plate2_Q11	17	11	995643
BSS2_A11_plate1_F11	6	11	3889713
BSS2_A12_plate1_G10	7	10	3090658
BSS2_A1_plate2_H10	8	10	806046
BSS2_A1_plate1_C15	3	15	228942
BSS2_A2_plate2_I10	9	10	826388
BSS2_A3_plate2_J10	10	10	2202109
BSS2_A4_plate1_B11	2	11	328684
BSS2_A5_plate1_C10	3	10	442117
BSS2_A6_plate2_M10	13	10	1576188
BSS2_A6_plate1_C7	3	7	468533
BSS2_A7_plate2_N12	14	12	1120039
BSS2_A7_plate1_D6	4	6	667042
BSS2_A8_plate2_O14	15	14	1296704
BSS2_A8_plate1_D3	4	3	547420
BSS2_A9_plate1_E2	5	2	1296651
BSS2_B10_plate2_P7	16	7	724293
BSS2_B10_plate1_F12	6	12	651566
BSS2_B11_plate2_Q9	17	9	917892
BSS2_B11_plate1_F9	6	9	343768
BSS2_B12_plate1_G8	7	8	349415
BSS2_B1_plate1_D15	4	15	212451
BSS2_B3_plate1_B12	2	12	245576
BSS2_B4_plate1_B9	2	9	1034617
BSS2_B5_plate1_C8	3	8	2108981
BSS2_B6_plate2_M8	13	8	1091149
BSS2_B6_plate1_C5	3	5	993232
BSS2_B7_plate2_N10	14	10	1150011
BSS2_B7_plate1_D4	4	4	557612
BSS2_B8_plate2_O12	15	12	1609805
BSS2_B8_plate1_D1	4	1	3689399
BSS2_B9_plate1_E13	5	13	300305
BSS2_C10_plate2_Q14	17	14	1116481
BSS2_C10_plate1_F10	6	10	1531301
BSS2_C11_plate2_Q7	17	7	437896
BSS2_C11_plate1_F7	6	7	459631
BSS2_C12_plate1_G13	7	13	442946
BSS2_C1_plate2_H13	8	13	1099999
BSS2_C2_plate2_I13	9	13	960005
BSS2_C2_plate1_A11	1	11	329867
BSS2_C3_plate2_J13	10	13	937532
BSS2_C3_plate1_B10	2	10	229384
BSS2_C4_plate2_K13	11	13	922518
BSS2_C4_plate1_B7	2	7	325827
BSS2_C5_plate2_L13	12	13	1267060
BSS2_C5_plate1_C6	3	6	395962
BSS2_C6_plate1_C3	3	3	376850
BSS2_C7_plate2_N8	14	8	1635038
BSS2_C7_plate1_D2	4	2	590671
BSS2_C8_plate2_O10	15	10	2149101
BSS2_C8_plate1_E14	5	14	297548
BSS2_C9_plate1_E11	5	11	345790
BSS2_D10_plate2_Q12	17	12	1495894
BSS2_D10_plate1_F8	6	8	626844
BSS2_D11_plate1_F5	6	5	461035
BSS2_D12_plate1_G11	7	11	388560
BSS2_D1_plate2_H11	8	11	2985166
BSS2_D2_plate2_I11	9	11	816142
BSS2_D3_plate2_J11	10	11	1003439
BSS2_D3_plate1_B8	2	8	387470
BSS2_D4_plate2_K11	11	11	2437555
BSS2_D4_plate1_B5	2	5	303137
BSS2_D5_plate2_L11	12	11	2408795
BSS2_D5_plate1_C4	3	4	1156892
BSS2_D6_plate2_M13	13	13	1747685
BSS2_D6_plate1_C1	3	1	1042340
BSS2_D7_plate1_D13	4	13	2126322
BSS2_D8_plate2_O8	15	8	1460547
BSS2_D8_plate1_E12	5	12	307639
BSS2_D9_plate2_P10	16	10	149134
BSS2_D9_plate1_E9	5	9	570792
BSS2_E10_plate1_F6	6	6	747400
BSS2_E11_plate1_F3	6	3	1414685
BSS2_E12_plate1_G9	7	9	287717
BSS2_E1_plate1_A10	1	10	636246
BSS2_E3_plate1_B6	2	6	423909
BSS2_E4_plate1_B3	2	3	2409157
BSS2_E5_plate1_C2	3	2	657855
BSS2_E6_plate1_D14	4	14	355172
BSS2_E7_plate1_D11	4	11	414338
BSS2_E8_plate1_E10	5	10	486309
BSS2_E9_plate1_E7	5	7	478108
BSS2_F10_plate2_Q8	17	8	620486
BSS2_F10_plate1_F4	6	4	2338754
BSS2_F11_plate1_F1	6	1	1626553
BSS2_F12_plate1_G7	7	7	1876432
BSS2_F3_plate1_B4	2	4	500073
BSS2_F4_plate1_B1	2	1	315799
BSS2_F5_plate1_C13	3	13	583554
BSS2_F6_plate2_M9	13	9	1140764
BSS2_F6_plate1_D12	4	12	1573290
BSS2_F7_plate2_N11	14	11	1171961
BSS2_F7_plate1_D9	4	9	398522
BSS2_F8_plate2_O13	15	13	931559
BSS2_F8_plate1_E8	5	8	434439
BSS2_F9_plate2_P6	16	6	115464
BSS2_F9_plate1_E5	5	5	559629
BSS2_G10_plate2_Q6	17	6	973316
BSS2_G10_plate1_F2	6	2	3645775
BSS2_G11_plate1_G14	7	14	324524
BSS2_G12_plate1_H14	8	14	342491
BSS2_G1_plate2_I14	9	14	688171
BSS2_G2_plate2_J14	10	14	734430
BSS2_G2_plate1_A3	1	3	674372
BSS2_G3_plate2_K14	11	14	812449
BSS2_G3_plate1_B2	2	2	946411
BSS2_G4_plate2_L14	12	14	842009
BSS2_G4_plate1_C14	3	14	305298
BSS2_G5_plate2_M14	13	14	946593
BSS2_G5_plate1_C11	3	11	832222
BSS2_G6_plate1_D10	4	10	455520
BSS2_G7_plate2_N9	14	9	1409412
BSS2_G7_plate1_D7	4	7	2006365
BSS2_G8_plate2_O11	15	11	735156
BSS2_G8_plate1_E6	5	6	912061
BSS2_G9_plate2_P13	16	13	119375
BSS2_G9_plate1_E3	5	3	842521
BSS2_H10_plate2_Q13	17	13	2538234
BSS2_H10_plate1_F13	6	13	450193
BSS2_H11_plate1_G12	7	12	379646
BSS2_H12_plate1_H12	8	12	454167
BSS2_H1_plate2_I12	9	12	1776211
BSS2_H1_plate1_A4	1	4	230430
BSS2_H2_plate2_J12	10	12	1531433
BSS2_H3_plate2_K12	11	12	2346192
BSS2_H4_plate2_L12	12	12	982677
BSS2_H4_plate1_C12	3	12	290325
BSS2_H5_plate2_M12	13	12	1451033
BSS2_H5_plate1_C9	3	9	356656
BSS2_H6_plate2_N14	14	14	1573601
BSS2_H6_plate1_D8	4	8	418981
BSS2_H7_plate2_N7	14	7	1031619
BSS2_H7_plate1_D5	4	5	531700
BSS2_H8_plate2_O9	15	9	1557178
BSS2_H8_plate1_E4	5	4	3915132
BSS2_H9_plate1_E1	5	1	489979
