# Supplementary material for: Spatial transcriptomic and single-nucleus analysis reveals heterogeneity in a gigantic single-celled syncytium
Source: eLife. 2022 Feb 23;11:e69745. doi: 10.7554/eLife.69745 (PMC8865844; doi:10.7554/eLife.69745)
Supplement: Supplementary file 5. — Excel sheets containing sampling information, sequencing library pooling scheme, and metadata such as grid coordinates and sequencing depth per grid. Sequencing depth is provided as the number of paired reads per grid, and only the grids that are analyzed in the article are listed on sheet 3. [file elife-69745-supp5.xlsx]

## Sheet: SM4
	1	2	3	4	5	6	7	8	9	10	11	12	13	14	15	16	17	18	19	20	21	22	23	24
A
B
C
D
E
F
G
H
I
J
K
L
M
N
O
P
PLATE 1														PLATE 2
	1	2	3	4	5	6	7	8	9	10	11	12			1	2	3	4	5	6	7	8	9	10	11	12
A	J4	L5	N6	I7	L7	M8	P8	D9	E10	H10	I11	L11		A	M12	P12	D13	E14	J14	D15	I16	C17
B	L4	N5	P6	K7	N7	O8	C9	F9	G10	J10	K11	N11		B	O12	C13	F13	G14	L14	F15	K16	E17
C	N4	P5	K6	M7	P7	D8	E9	H9	I10	L10	M11	P11		C	D12	E13	H13	I14	C15	H15	M16	G17
D	P4	K5	M6	O7	C8	F8	G9	J9	K10	N10	O11	C12		D	F12	G13	J13	K14	E15	J15	D16	I17
E	K4	M5	O6	D7	E8	H8	I9	L9	M10	P10	D11	E12		E	H12	I13	L13	M14	G15	L15	F16	K17
F	M4	O5	C7	F7	G8	J8	K9	N9	O10	C11	F11	G12		F	J12	K13	N13	D14	I15	C16	H16	M17
G	O4	J6	E7	H7	I8	L8	M9	P9	D10	E11	H11	I12		G	L12	M13	P13	F14	K15	E16	J16	D17
H	J5	L6	G7	J7	K8	N8	O9	C10	F10	G11	J11	K12		H	N12	O13	C14	H14	M15	G16	L16	F17
Nextera library indexing with primer sets A and B in order to sequence as a pool
PLATE 1 seq lib pool GER066														PLATE 2 seq lib pool GER066
	1	2	3	4	5	6	7	8	9	10	11	12			1	2	3	4	5	6	7	8	9	10	11	12
A	J4A	L5A	N6A	I7A	L7A	M8A	P8A	D9A	E10A	H10A	I11A	L11A		A	M12B	P12B	D13B	E14B	J14B	D15B	I16B	C17B	O22B	K23B	G24B	N24B
B	L4A	N5A	P6A	K7A	N7A	O8A	C9A	F9A	G10A	J10A	K11A	N11A		B	O12B	C13B	F13B	G14B	L14B	F15B	K16B	E17B	H22B	M23B	I24B	P24B
C	N4A	P5A	K6A	M7A	P7A	D8A	E9A	H9A	I10A	L10A	M11A	P11A		C	D12B	E13B	H13B	I14B	C15B	H15B	M16B	G17B	J22B	O23B	K24B	A1B
D	P4A	K5A	M6A	O7A	C8A	F8A	G9A	J9A	K10A	N10A	O11A	C12A		D	F12B	G13B	J13B	K14B	E15B	J15B	D16B	I17B	L22B	H23B	M24B	C1B
E	K4A	M5A	O6A	D7A	E8A	H8A	I9A	L9A	M10A	P10A	D11A	E12A		E	H12B	I13B	L13B	M14B	G15B	L15B	F16B	K17B	N22B	K23B	O24B	E1B
F	M4A	O5A	C7A	F7A	G8A	J8A	K9A	N9A	O10A	C11A	F11A	G12A		F	J12B	K13B	N13B	D14B	I15B	C16B	H16B	M17B	P22B	L23B	H24B	B1B
G	O4A	J6A	E7A	H7A	I8A	L8A	M9A	P9A	D10A	E11A	H11A	I12A		G	L12B	M13B	P13B	F14B	K15B	E16B	J16B	D17B	G23B	N23B	J24B	D1B
H	J5A	L6A	G7A	J7A	K8A	N8A	O9A	C10A	F10A	G11A	J11A	K12A		H	N12B	O13B	C14B	H14B	M15B	G16B	L16B	F17B	I23B	P23B	L24B	F1B
																							SM1 plate 3 row 5-8

## Sheet: SM4_Grid
384_Plate_Position	96_Plate_Number	96_Plate_Position	Grid_Coordinates
J4	1	A1	A7
L4	1	B1	A5
N4	1	C1	A3
P4	1	D1	A1
K4	1	E1	A6
M4	1	F1	A4
O4	1	G1	A2
J5	1	H1	B7
L5	1	A2	B5
N5	1	B2	B3
P5	1	C2	B1
K5	1	D2	B6
M5	1	E2	B4
O5	1	F2	B2
J6	1	G2	C7
L6	1	H2	C5
N6	1	A3	C3
P6	1	B3	C1
K6	1	C3	C6
M6	1	D3	C4
O6	1	E3	C2
C7	1	F3	D14
E7	1	G3	D12
G7	1	H3	D10
I7	1	A4	D8
K7	1	B4	D6
M7	1	C4	D4
O7	1	D4	D2
D7	1	E4	D13
F7	1	F4	D11
H7	1	G4	D9
J7	1	H4	D7
L7	1	A5	D5
N7	1	B5	D3
P7	1	C5	D1
C8	1	D5	E14
E8	1	E5	E12
G8	1	F5	E10
I8	1	G5	E8
K8	1	H5	E6
M8	1	A6	E4
O8	1	B6	E2
D8	1	C6	E13
F8	1	D6	E11
H8	1	E6	E9
J8	1	F6	E7
L8	1	G6	E5
N8	1	H6	E3
P8	1	A7	E1
C9	1	B7	F14
E9	1	C7	F12
G9	1	D7	F10
I9	1	E7	F8
K9	1	F7	F6
M9	1	G7	F4
O9	1	H7	F2
D9	1	A8	F13
F9	1	B8	F11
H9	1	C8	F9
J9	1	D8	F7
L9	1	E8	F5
N9	1	F8	F3
P9	1	G8	F1
C10	1	H8	G14
E10	1	A9	G12
G10	1	B9	G10
I10	1	C9	G8
K10	1	D9	G6
M10	1	E9	G4
O10	1	F9	G2
D10	1	G9	G13
F10	1	H9	G11
H10	1	A10	G9
J10	1	B10	G7
L10	1	C10	G5
N10	1	D10	G3
P10	1	E10	G1
C11	1	F10	H14
E11	1	G10	H12
G11	1	H10	H10
I11	1	A11	H8
K11	1	B11	H6
M11	1	C11	H4
O11	1	D11	H2
D11	1	E11	H13
F11	1	F11	H11
H11	1	G11	H9
J11	1	H11	H7
L11	1	A12	H5
N11	1	B12	H3
P11	1	C12	H1
C12	1	D12	I14
E12	1	E12	I12
G12	1	F12	I10
I12	1	G12	I8
K12	1	H12	I6
M12	2	A1	I4
O12	2	B1	I2
D12	2	C1	I13
F12	2	D1	I11
H12	2	E1	I9
J12	2	F1	I7
L12	2	G1	I5
N12	2	H1	I3
P12	2	A2	I1
C13	2	B2	J14
E13	2	C2	J12
G13	2	D2	J10
I13	2	E2	J8
K13	2	F2	J6
M13	2	G2	J4
O13	2	H2	J2
D13	2	A3	J13
F13	2	B3	J11
H13	2	C3	J9
J13	2	D3	J7
L13	2	E3	J5
N13	2	F3	J3
P13	2	G3	J1
C14	2	H3	K14
E14	2	A4	K12
G14	2	B4	K10
I14	2	C4	K8
K14	2	D4	K6
M14	2	E4	K4
D14	2	F4	K13
F14	2	G4	K11
H14	2	H4	K9
J14	2	A5	K7
L14	2	B5	K5
C15	2	C5	L14
E15	2	D5	L12
G15	2	E5	L10
I15	2	F5	L8
K15	2	G5	L6
M15	2	H5	L4
D15	2	A6	L13
F15	2	B6	L11
H15	2	C6	L9
J15	2	D6	L7
L15	2	E6	L5
C16	2	F6	M14
E16	2	G6	M12
G16	2	H6	M10
I16	2	A7	M8
K16	2	B7	M6
M16	2	C7	M4
D16	2	D7	M13
F16	2	E7	M11
H16	2	F7	M9
J16	2	G7	M7
L16	2	H7	M5
C17	2	A8	N14
E17	2	B8	N12
G17	2	C8	N10
I17	2	D8	N8
K17	2	E8	N6
M17	2	F8	N4
D17	2	G8	N13
F17	2	H8	N11

## Sheet: SM4_Coordinates
Well_ID	Spatial_1	Spatial_2	reads
BSS4_A11_plate1_H8	8	8	1965506
BSS4_A12_plate1_H5	8	5	601245
BSS4_A1_plate1_A7	1	7	681960
BSS4_A2_plate1_B5	2	5	426724
BSS4_A2_plate2_I1	9	1	2094582
BSS4_A3_plate1_C3	3	3	336358
BSS4_A3_plate2_J13	10	13	311987
BSS4_A4_plate1_D8	4	8	367627
BSS4_A4_plate2_K12	11	12	1902633
BSS4_A5_plate1_D5	4	5	354324
BSS4_A5_plate2_K7	11	7	1136083
BSS4_A6_plate1_E4	5	4	368393
BSS4_A7_plate2_M8	13	8	408536
BSS4_A9_plate1_G12	7	12	367379
BSS4_B10_plate1_G7	7	7	220915
BSS4_B11_plate1_H6	8	6	249060
BSS4_B12_plate1_H3	8	3	726494
BSS4_B1_plate1_A5	1	5	195096
BSS4_B2_plate1_B3	2	3	273337
BSS4_B3_plate1_C1	3	1	664563
BSS4_B3_plate2_J11	10	11	706692
BSS4_B4_plate1_D6	4	6	478002
BSS4_B4_plate2_K10	11	10	506837
BSS4_B5_plate1_D3	4	3	285331
BSS4_B6_plate1_E2	5	2	1697527
BSS4_B6_plate2_L11	12	11	1237903
BSS4_B8_plate2_N12	14	12	127606
BSS4_C10_plate1_G5	7	5	670518
BSS4_C11_plate1_H4	8	4	295051
BSS4_C12_plate1_H1	8	1	986641
BSS4_C1_plate1_A3	1	3	239699
BSS4_C1_plate2_I13	9	13	1316541
BSS4_C2_plate1_B1	2	1	221707
BSS4_C2_plate2_J12	10	12	715004
BSS4_C3_plate1_C6	3	6	1648502
BSS4_C3_plate2_J9	10	9	457594
BSS4_C4_plate1_D4	4	4	767588
BSS4_C4_plate2_K8	11	8	288694
BSS4_C5_plate1_D1	4	1	2167321
BSS4_C6_plate2_L9	12	9	983640
BSS4_C8_plate2_N10	14	10	2102051
BSS4_D10_plate1_G3	7	3	845042
BSS4_D11_plate1_H2	8	2	602041
BSS4_D12_plate1_I14	9	14	1068661
BSS4_D1_plate1_A1	1	1	515255
BSS4_D1_plate2_I11	9	11	1007886
BSS4_D2_plate1_B6	2	6	302394
BSS4_D2_plate2_J10	10	10	1161550
BSS4_D3_plate1_C4	3	4	305281
BSS4_D3_plate2_J7	10	7	298029
BSS4_D4_plate1_D2	4	2	2396302
BSS4_D5_plate2_L12	12	12	1550125
BSS4_D6_plate2_L7	12	7	853759
BSS4_D9_plate1_G6	7	6	328441
BSS4_E11_plate1_H13	8	13	442098
BSS4_E12_plate1_I12	9	12	1670043
BSS4_E1_plate1_A6	1	6	240444
BSS4_E1_plate2_I9	9	9	1969227
BSS4_E2_plate1_B4	2	4	270677
BSS4_E2_plate2_J8	10	8	262150
BSS4_E3_plate1_C2	3	2	311752
BSS4_E3_plate2_J5	10	5	1187072
BSS4_E5_plate2_L10	12	10	726450
BSS4_E6_plate1_E9	5	9	1462830
BSS4_E7_plate2_M11	13	11	2892415
BSS4_E8_plate1_F5	6	5	249859
BSS4_E9_plate1_G4	7	4	289309
BSS4_F10_plate1_H14	8	14	790900
BSS4_F11_plate1_H11	8	11	512322
BSS4_F12_plate1_I10	9	10	1285449
BSS4_F1_plate1_A4	1	4	182171
BSS4_F1_plate2_I7	9	7	309232
BSS4_F2_plate1_B2	2	2	263378
BSS4_F2_plate2_J6	10	6	810240
BSS4_F4_plate2_K13	11	13	846003
BSS4_F5_plate2_L8	12	8	383633
BSS4_F6_plate1_E7	5	7	252391
BSS4_F7_plate1_F6	6	6	241966
BSS4_F7_plate2_M9	13	9	348887
BSS4_F8_plate1_F3	6	3	366528
BSS4_F9_plate1_G2	7	2	2112031
BSS4_G10_plate1_H12	8	12	717581
BSS4_G11_plate1_H9	8	9	511888
BSS4_G12_plate1_I8	9	8	2070397
BSS4_G1_plate1_A2	1	2	237859
BSS4_G1_plate2_I5	9	5	246940
BSS4_G2_plate1_C7	3	7	1075698
BSS4_G4_plate1_D9	4	9	323711
BSS4_G4_plate2_K11	11	11	411143
BSS4_G5_plate1_E8	5	8	281866
BSS4_G6_plate1_E5	5	5	632135
BSS4_G6_plate2_M12	13	12	1275243
BSS4_G7_plate1_F4	6	4	227493
BSS4_G7_plate2_M7	13	7	197040
BSS4_H10_plate1_H10	8	10	2395097
BSS4_H11_plate1_H7	8	7	922955
BSS4_H12_plate1_I6	9	6	1723362
BSS4_H1_plate1_B7	2	7	1483553
BSS4_H2_plate1_C5	3	5	254876
BSS4_H3_plate2_K14	11	14	2545345
BSS4_H4_plate2_K9	11	9	1719760
BSS4_H5_plate1_E6	5	6	319558
BSS4_H6_plate1_E3	5	3	498361
BSS4_H9_plate1_G11	7	11	1114649
