# Supplementary material for: Spatial transcriptomic and single-nucleus analysis reveals heterogeneity in a gigantic single-celled syncytium
Source: eLife. 2022 Feb 23;11:e69745. doi: 10.7554/eLife.69745 (PMC8865844; doi:10.7554/eLife.69745)
Supplement: Supplementary file 6. — Excel sheets containing sampling information, sequencing library pooling scheme, and metadata such as grid coordinates and sequencing depth per grid. Sequencing depth is provided as the number of total reads per grid. [file elife-69745-supp6.xlsx]

## Sheet: T1
96_Plate_Position	Seq_Plate_Position	Well_ID	Grid_Coordinates	Spatial_1	Spatial_2	reads	Timeline
A1	A1B	A1_stardeath	I1	9	1	938948	1
A2	A8B	A2_stardeath	A6	1	6	2843751	9
A3	A9B	A3_stardeath	K7	11	7	3520294	17
A4	A10B	A4_stardeath	O18	15	18	1953941	25
A5	A11B	A5_stardeath	O23	15	23	2602298	33
A6	A12B	A6_stardeath	J16	10	16	4853445	41
B1	B1B	B1_stardeath	G3	7	3	825608	2
B2	B8B	B2_stardeath	A8	1	8	2291674	10
B3	B9B	B3_stardeath	G1	7	1	3067507	18
B4	B10B	B4_stardeath	M19	13	19	1678392	26
B5	B11B	B5_stardeath	P25	16	25	2392733	34
B6	B12B	B6_stardeath	H16	8	16	3179628	42
C1	C1B	C1_stardeath	E5	5	5	1208730	3
C2	C8B	C2_stardeath	C10	3	10	1786964	11
C3	C9B	C3_stardeath	L10	12	10	1584938	19
C4	C10B	C4_stardeath	M21	13	21	2666810	27
C5	C11B	C5_stardeath	Q26	17	26	2149365	35
C6	C12B	C6_stardeath	F16	6	16	5733896	43
D1	D1B	D1_stardeath	F7	6	7	667539	4
D2	D8B	D2_stardeath	F10	6	10	2565367	12
D3	D9B	D3_stardeath	I3	9	3	2350791	20
D4	D10B	D4_stardeath	K20	11	20	3214720	28
D5	D11B	D5_stardeath	R23	18	23	2425946	36
D6	D12B	D6_stardeath	F15	6	15	3917106	44
E1	E1B	E1_stardeath	D7	4	7	847822	5
E2	E8B	E2_stardeath	I8	9	8	3315657	13
E3	E9B	E3_stardeath	M12	13	12	2373404	21
E4	E10B	E4_stardeath	Q19	17	19	2199173	29
E5	E11B	E5_stardeath	S21	19	21	2631449	37
E6	E12B	E6_stardeath	E17	5	17	2917359	45
F1	F1B	F1_stardeath	E3	5	3	648942	6
F2	F8B	F2_stardeath	K3	11	3	2891591	14
F3	F9B	F3_stardeath	L14	12	14	2490350	22
F4	F10B	F4_stardeath	R19	18	19	2083915	30
F5	F11B	F5_stardeath	T24	20	24	2599059	38
F6	F12B	F6_stardeath	E15	5	15	6851227	46
G1	G1B	G1_stardeath	A2	1	2	1515422	7
G2	G8B	G2_stardeath	J5	10	5	2387793	15
G3	G9B	G3_stardeath	N15	14	15	2886846	23
G4	G10B	G4_stardeath	Q21	17	21	2398646	31
G5	G11B	G5_stardeath	U22	21	22	2344385	39
G6	G12B	G6_stardeath	D18	4	18	2663607	47
H1	H1B	H1_stardeath	C4	3	4	864021	8
H2	H8B	H2_stardeath	G6	7	6	2193043	16
H3	H9B	H3_stardeath	P16	16	16	2185835	24
H4	H10B	H4_stardeath	N21	14	21	2276333	32
H5	H11B	H5_stardeath	W22	23	22	2288936	40
H6	H12B	H6_stardeath	C17	3	17	3304810	48

## Sheet: T2
96_Plate_Position	Seq_Plate_Position	Well_ID	Grid_Coordinates	Spatial_1	Spatial_2	reads	Timeline
A1	A1A	A1_number2	J1	10	1	2050263	1
A10	A10A	A10_number2	E5	5	5	3779164	73
A2	A2A	A2_number2	O5	15	5	3204948	9
A3	A3A	A3_number2	K7	11	7	2907071	17
A4	A4A	A4_number2	G7	7	7	2844969	25
A5	A5A	A5_number2	K13	11	13	3447973	33
A6	A6A	A6_number2	F17	6	17	3353836	41
A7	A7A	A7_number2	F15	6	15	4822580	49
A8	A8A	A8_number2	B13	2	13	2892976	57
A9	A9A	A9_number2	D10	4	10	2849969	65
B1	B1A	B1_number2	K3	11	3	4244585	2
B10	B10A	B10_number2	J12	10	12	4530277	74
B2	B2A	B2_number2	K5	11	5	3367597	10
B3	B3A	B3_number2	L8	12	8	3966220	18
B4	B4A	B4_number2	I9	9	9	3544281	26
B5	B5A	B5_number2	J13	10	13	4064137	34
B6	B6A	B6_number2	H17	8	17	4854355	42
B7	B7A	B7_number2	D15	4	15	5952973	50
B8	B8A	B8_number2	G12	7	12	3548134	58
B9	B9A	B9_number2	D9	4	9	3409130	66
C1	C1A	C1_number2	J2	10	2	2680356	3
C10	C10A	C10_number2	J11	10	11	4350871	75
C2	C2A	C2_number2	O6	15	6	3121082	11
C3	C3A	C3_number2	N9	14	9	3129627	19
C4	C4A	C4_number2	J10	10	10	2736941	27
C5	C5A	C5_number2	J15	10	15	3918608	35
C6	C6A	C6_number2	G16	7	16	3084378	43
C7	C7A	C7_number2	E14	5	14	5808416	51
C8	C8A	C8_number2	E12	5	12	2962932	59
C9	C9A	C9_number2	E10	5	10	3258026	67
D1	D1A	D1_number2	M3	13	3	3065677	4
D10	D10A	D10_number2	I10	9	10	4467772	76
D2	D2A	D2_number2	Q6	17	6	3017857	12
D3	D3A	D3_number2	O10	15	10	3703769	20
D4	D4A	D4_number2	L10	12	10	2857554	28
D5	D5A	D5_number2	I16	9	16	5202962	36
D6	D6A	D6_number2	H15	8	15	3198892	44
D7	D7A	D7_number2	C14	3	14	5562474	52
D8	D8A	D8_number2	C12	3	12	3047179	60
D9	D9A	D9_number2	F9	6	9	2888529	68
E1	E1A	E1_number2	O3	15	3	1317046	5
E10	E10A	E10_number2	H9	8	9	2569457	77
E2	E2A	E2_number2	P7	16	7	2309639	13
E3	E3A	E3_number2	K9	11	9	3287418	21
E4	E4A	E4_number2	M12	13	12	2618240	29
E5	E5A	E5_number2	I18	9	18	3613719	37
E6	E6A	E6_number2	I13	9	13	3280450	45
E7	E7A	E7_number2	B14	2	14	3031770	53
E8	E8A	E8_number2	B12	2	12	2458514	61
E9	E9A	E9_number2	H10	8	10	2868329	69
F1	F1A	F1_number2	N4	14	4	2348207	6
F10	F10A	F10_number2	H8	8	8	3709583	78
F2	F2A	F2_number2	O8	15	8	2857223	14
F3	F3A	F3_number2	J8	10	8	2351456	22
F4	F4A	F4_number2	N11	14	11	1880078	30
F5	F5A	F5_number2	H19	8	19	5011902	38
F6	F6A	F6_number2	G14	7	14	3239895	46
F7	F7A	F7_number2	H13	8	13	2703144	54
F8	F8A	F8_number2	B11	2	11	2135699	62
F9	F9A	F9_number2	C8	3	8	2746487	70
G1	G1A	G1_number2	L4	12	4	1735235	7
G10	G10A	G10_number2	G8	7	8	4584938	79
G2	G2A	G2_number2	M8	13	8	2575517	15
G3	G3A	G3_number2	I7	9	7	2894954	23
G4	G4A	G4_number2	O12	15	12	3713423	31
G5	G5A	G5_number2	I21	9	21	2338608	39
G6	G6A	G6_number2	D16	4	16	4064623	47
G7	G7A	G7_number2	F13	6	13	4754439	55
G8	G8A	G8_number2	D11	4	11	3001637	63
G9	G9A	G9_number2	D7	4	7	2044244	71
H1	H1A	H1_number2	J4	10	4	2933711	8
H10	H10A	H10_number2	F7	6	7	4325467	80
H2	H2A	H2_number2	J6	10	6	2925591	16
H3	H3A	H3_number2	H8	8	8	2779330	24
H4	H4A	H4_number2	K11	11	11	2974273	32
H5	H5A	H5_number2	G20	7	20	2862710	40
H6	H6A	H6_number2	C16	3	16	2877161	48
H7	H7A	H7_number2	D13	4	13	3926537	56
H8	H8A	H8_number2	C10	3	10	2694749	64
H9	H9A	H9_number2	E6	5	6	1040889	72

## Sheet: T3
96_Plate_Position	Seq_Plate_Position	Well_ID	Grid_Coordinates	Spatial_1	Spatial_2	reads	Timeline
A2	A2B	A2_flower	G12	7	12	4340654	1
A3	A3B	A3_flower	J11	11	17	4191544	9
A4	A4B	A4_flower	I17	13	14	3886794	17
A5	A5B	A5_flower	I18	8	21	5349767	25
A6	A6B	A6_flower	I19	8	17	5087123	33
A7	A7B	A7_flower	I20	1	16	6244648	41
B2	B2B	B2_flower	K19	10	11	5817793	2
B3	B3B	B3_flower	L18	12	20	3502592	10
B4	B4B	B4_flower	K17	15	15	3948131	18
B5	B5B	B5_flower	L20	8	22	5760975	26
B6	B6B	B6_flower	N20	7	16	2486022	34
B7	B7B	B7_flower	P19	1	15	7839817	42
C2	C2B	C2_flower	P18	9	17	4023466	3
C3	C3B	C3_flower	O17	14	20	3498739	11
C4	C4B	C4_flower	M18	17	14	2645965	19
C5	C5B	C5_flower	L17	10	23	3706280	27
C6	C6B	C6_flower	M14	6	14	3008810	35
C7	C7B	C7_flower	O15	1	14	6667426	43
D2	D2B	D2_flower	Q14	9	18	4853768	4
D3	D3B	D3_flower	Q13	16	19	4292514	12
D4	D4B	D4_flower	P12	17	13	4909777	20
D5	D5B	D5_flower	O12	12	23	2891650	28
D6	D6B	D6_flower	N12	5	15	2830530	36
D7	D7B	D7_flower	L13	1	13	8038210	44
E2	E2B	E2_flower	H21	9	19	6490732	5
E3	E3B	E3_flower	H22	16	18	3739866	13
E4	E4B	E4_flower	J23	16	12	3127435	21
E5	E5B	E5_flower	L23	12	22	1949907	29
E6	E6B	E6_flower	L22	4	15	3868976	37
E7	E7B	E7_flower	K22	2	13	6260850	45
F2	F2B	F2_flower	L21	9	20	2632170	6
F3	F3B	F3_flower	K21	15	17	1637599	14
F4	F4B	F4_flower	H17	15	12	2511257	22
F5	F5B	F5_flower	G16	11	22	948878	30
F6	F6B	F6_flower	F14	3	16	7079375	38
F7	F7B	F7_flower	E15	4	13	6587640	46
G2	G2B	G2_flower	D15	11	19	3304087	7
G3	G3B	G3_flower	C16	13	18	3117215	15
G4	G4B	G4_flower	C17	14	12	1758946	23
G5	G5B	G5_flower	A17	12	21	1933872	31
G6	G6B	G6_flower	A16	3	17	1341560	39
G7	G7B	G7_flower	A15	1	12	4309544	47
H2	H2B	H2_flower	A14	12	18	3535091	8
H3	H3B	H3_flower	A13	12	17	1847288	16
H4	H4B	H4_flower	B13	12	13	1656009	24
H5	H5B	H5_flower	D13	11	21	2311205	32
H6	H6B	H6_flower	A12	1	17	2377685	40
H7	H7B	H7_flower	F13	6	13	9156189	48
