# Supplementary material for: Spatial transcriptomic and single-nucleus analysis reveals heterogeneity in a gigantic single-celled syncytium
Source: eLife. 2022 Feb 23;11:e69745. doi: 10.7554/eLife.69745 (PMC8865844; doi:10.7554/eLife.69745)
Supplement: Supplementary file 7. — Excel sheets containing cluster marker information and GOseq enrichments to explore the complete list of gene expression differences identified. Lists presented are sorted by the corresponding figure numbers. [file elife-69745-supp7.xlsx]

## Sheet: SM1-4_ClusterMarker_Fig2B
gene	p_val	avg_logFC	pct.1	pct.2	p_val_adj	cluster	UniProt_Acc	GOterm	Domain	ID	diff	plasmodium
Phypoly-transcript-07720	4.24868e-77	5.83426	1	0.98	6.42401e-73	0	TBAN_PHYPO	GO:0005525|GO:0005874|GO:0007017|GO:0003924|GO:0005525|GO:0006184|GO:0043234|GO:0051258	Tubulin subunits alpha, beta, and gamma signature.|Tubulin C-terminal domain	Phypoly-transcript-07720	0.02	SM1
Phypoly-transcript-11405	8.95667e-81	5.75971	0.97	0.416	1.35425e-76	0	CDK1_DICDI	GO:0004674|GO:0006468|GO:0005524|GO:0004672|GO:0005524|GO:0006468|GO:0004672|GO:0005524|GO:0006468	Serine/Threonine protein kinases active-site signature.|Protein kinases ATP-binding region signature.|Protein kinase domain profile.|Protein kinase domain	Phypoly-transcript-11405	0.554	SM1
Phypoly-transcript-20038	5.5046e-78	5.50572	0.97	0.523	8.32296e-74	0	DUT_SOLLC	GO:0016787|GO:0046080	1335	Phypoly-transcript-20038	0.447	SM1
Phypoly-transcript-06023	1.81434e-78	5.4313	0.97	0.509	2.74328e-74	0	CDC45_DICDI	GO:0006270	688	Phypoly-transcript-06023	0.461	SM1
Phypoly-transcript-13303	3.99528e-75	5.43042	0.98	0.841	6.04086e-71	0	PCNA_BRANA	GO:0003677|GO:0006275	3241	Phypoly-transcript-13303	0.139	SM1
Phypoly-transcript-09714	7.46387e-81	5.28166	0.964	0.387	1.12854e-76	0	PRI1_MOUSE	GO:0003896|GO:0006269	1469	Phypoly-transcript-09714	0.577	SM1
Phypoly-transcript-02804	4.02262e-88	5.22105	0.964	0.22	6.0822e-84	0	KIF3B_MOUSE	GO:0003777|GO:0005524|GO:0007018|GO:0008017|GO:0003777|GO:0005524|GO:0007018|GO:0008017	Kinesin motor domain profile.|Kinesin motor domain	Phypoly-transcript-02804	0.744	SM1
Phypoly-transcript-02453	1.37808e-89	5.19361	0.98	0.231	2.08366e-85	0	KIF10_DICDI	GO:0003777|GO:0005524|GO:0007018|GO:0008017|GO:0003777|GO:0005524|GO:0007018|GO:0003777|GO:0005524|GO:0007018|GO:0008017	Kinesin motor domain|Kinesin motor domain signature.|Kinesin motor domain profile.	Phypoly-transcript-02453	0.749	SM1
Phypoly-transcript-17205	2.9776e-76	5.19064	0.975	0.676	4.50214e-72	0	UBE2S_DICDI	GO:0016881|GO:0016881	Ubiquitin-conjugating enzymes family profile.|Ubiquitin-conjugating enzyme	Phypoly-transcript-17205	0.299	SM1
Phypoly-transcript-18475	6.88331e-82	5.09947	0.97	0.387	1.04076e-77	0	DAK_DICDI	GO:0005524|GO:0006139|GO:0016773	1044	Phypoly-transcript-18475	0.583	SM1
Phypoly-transcript-07983	8.41871e-77	5.087	0.97	0.584	1.27291e-72	0	PRI2_RAT	GO:0003896|GO:0006269	1470	Phypoly-transcript-07983	0.386	SM1
Phypoly-transcript-08739	2.05798e-92	5.01287	0.97	0.153	3.11166e-88	0	NUF2_NEUCR	GO:0000775|GO:0007067	2796	Phypoly-transcript-08739	0.817	SM1
Phypoly-transcript-07863	7.42152e-81	5.00255	0.98	0.454	1.12213e-76	0	AURAA_XENLA	GO:0004672|GO:0005524|GO:0006468|GO:0005524|GO:0004674|GO:0006468|GO:0004672|GO:0005524|GO:0006468	Protein kinase domain profile.|Protein kinases ATP-binding region signature.|Serine/Threonine protein kinases active-site signature.|Protein kinase domain	Phypoly-transcript-07863	0.526	SM1
Phypoly-transcript-08256	5.56229e-76	4.93444	0.975	0.61	8.41018e-72	0	CCNB_DICDI	GO:0005634	929	Phypoly-transcript-08256	0.365	SM1
Phypoly-transcript-06678	5.6555e-75	4.79219	0.995	0.919	8.55112e-71	0	TBB2_PHYPO	GO:0005525|GO:0005874|GO:0007017|GO:0003924|GO:0005525|GO:0006184|GO:0043234|GO:0051258	Tubulin subunits alpha, beta, and gamma signature.|Tubulin C-terminal domain	Phypoly-transcript-06678	0.076	SM1
Phypoly-transcript-01134	6.02623e-77	4.67406	0.975	0.665	9.11166e-73	0	SMC2_DICDI	GO:0005515|GO:0005524|GO:0005694|GO:0051276	4156	Phypoly-transcript-01134	0.31	SM1
Phypoly-transcript-06980	6.53595e-78	4.67039	0.975	0.54	9.88235e-74	0	DPOE2_DICDI	GO:0003677|GO:0003887|GO:0006260	1124	Phypoly-transcript-06980	0.435	SM1
Phypoly-transcript-03793	4.34079e-80	4.65927	0.97	0.422	6.56327e-76	0	MCM5_ORYSI	GO:0003677|GO:0005524|GO:0006260|GO:0003677|GO:0005524|GO:0006260|GO:0003677|GO:0005524|GO:0006260	MCM family domain profile.|MCM2/3/5 family|MCM family signature.	Phypoly-transcript-03793	0.548	SM1
Phypoly-transcript-00408	1.03166e-81	4.61427	0.975	0.402	1.55986e-77	0	KIF15_RAT	GO:0003777|GO:0005524|GO:0007018|GO:0008017|GO:0003777|GO:0005524|GO:0007018|GO:0008017|GO:0003777|GO:0005524|GO:0007018	Kinesin motor domain|Kinesin motor domain profile.|Kinesin motor domain signature.	Phypoly-transcript-00408	0.573	SM1
Phypoly-transcript-03486	2.25507e-87	4.60105	0.975	0.254	3.40966e-83	0	KIF22_DANRE	GO:0003777|GO:0005524|GO:0007018|GO:0008017|GO:0003777|GO:0005524|GO:0007018|GO:0003777|GO:0005524|GO:0007018|GO:0008017	Kinesin motor domain profile.|Kinesin motor domain signature.|Kinesin motor domain	Phypoly-transcript-03486	0.721	SM1
Phypoly-transcript-09951	1.59572e-73	4.59043	0.97	0.829	2.41273e-69	0	FEN1_BRAFL	GO:0004518|GO:0006281|GO:0016788|GO:0004518	XPG N-terminal domain|XPG protein signature 1.|XPG I-region	Phypoly-transcript-09951	0.141	SM1
Phypoly-transcript-05491	4.28344e-84	4.52826	0.985	0.373	6.47656e-80	0	noGene	GO:0005515	1605	Phypoly-transcript-05491	0.612	SM1
Phypoly-transcript-00261	4.50149e-82	4.52165	0.975	0.37	6.80626e-78	0	KI67_HUMAN	GO:0005515	1605	Phypoly-transcript-00261	0.605	SM1
Phypoly-transcript-07525	1.89057e-79	4.45483	0.99	0.59	2.85855e-75	0	TBB1_PHYPO	GO:0005525|GO:0005874|GO:0007017|GO:0003924|GO:0005525|GO:0006184|GO:0043234|GO:0051258	Tubulin subunits alpha, beta, and gamma signature.|Tubulin C-terminal domain	Phypoly-transcript-07525	0.4	SM1
Phypoly-transcript-00381	9.72765e-78	4.34342	0.97	0.512	1.47082e-73	0	TOP2_DICDI	GO:0003677|GO:0003918|GO:0005524|GO:0006265|GO:0005524|GO:0003677|GO:0003918|GO:0005524|GO:0006265|GO:0003677|GO:0003918|GO:0005524|GO:0006265	DNA gyrase/topoisomerase IV, subunit A|Histidine kinase-, DNA gyrase B-, and HSP90-like ATPase|DNA topoisomerase II signature.|DNA gyrase B	Phypoly-transcript-00381	0.458	SM1
Phypoly-transcript-00921	3.84997e-76	4.34205	0.98	0.725	5.82116e-72	0	SMC4_DICDI	GO:0005515|GO:0005524|GO:0005694|GO:0051276	4156	Phypoly-transcript-00921	0.255	SM1
Phypoly-transcript-11902	1.54424e-90	4.33686	0.975	0.197	2.33489e-86	0	HERC2_HUMAN	GO:0004725|GO:0016311|GO:0016791|GO:0016311|GO:0016791|GO:0008270|GO:0006470|GO:0008138|GO:0008270	Tyrosine specific protein phosphatases active site.|Tyrosine specific protein phosphatases family profile.|Zinc finger ZZ-type profile.|Dual specificity phosphatase, catalytic domain|Zinc finger, ZZ type	Phypoly-transcript-11902	0.778	SM1
Phypoly-transcript-01219	1.18097e-78	4.30304	0.985	0.575	1.78563e-74	0	DPOD1_DICDI	GO:0000166|GO:0003676|GO:0003887|GO:0006139|GO:0000166|GO:0003677|GO:0003887|GO:0006260	DNA polymerase family B signature.|DNA polymerase family B	Phypoly-transcript-01219	0.41	SM1
Phypoly-transcript-06985	9.94846e-77	4.29817	0.964	0.535	1.50421e-72	0	DPOD2_ARATH	GO:0003677|GO:0003887|GO:0006260	1124	Phypoly-transcript-06985	0.429	SM1
Phypoly-transcript-01188	2.38984e-78	4.26196	0.97	0.503	3.61343e-74	0	CNDG2_MOUSE	GO:0005634	853	Phypoly-transcript-01188	0.467	SM1
Phypoly-transcript-00675	8.86932e-76	4.25024	0.985	0.806	1.34104e-71	0	KIF2_DICDI	GO:0003777|GO:0005524|GO:0007018|GO:0008017|GO:0003777|GO:0005524|GO:0007018|GO:0008017	Kinesin motor domain|Kinesin motor domain profile.	Phypoly-transcript-00675	0.179	SM1
Phypoly-transcript-27931	1.17251e-79	4.22356	0.964	0.405	1.77283e-75	0	DPOE3_PONAB	GO:0005622|GO:0043565	2084	Phypoly-transcript-27931	0.559	SM1
Phypoly-transcript-06883	2.92829e-76	4.13241	0.97	0.566	4.42757e-72	0	IMA1_ARATH	GO:0005515|GO:0005634|GO:0005737|GO:0006606|GO:0008565|GO:0005515|GO:0005634|GO:0005737|GO:0006606|GO:0008565	Armadillo/plakoglobin ARM repeat profile.|Importin beta binding domain|Armadillo/beta-catenin-like repeat|IBB domain profile.	Phypoly-transcript-06883	0.404	SM1
Phypoly-transcript-12145	6.79756e-74	4.074	0.97	0.743	1.02779e-69	0	RIR2_DICDI	GO:0009186|GO:0055114|GO:0009186|GO:0055114	Ribonucleotide reductase, small chain|Ribonucleotide reductase small subunit signature.	Phypoly-transcript-12145	0.227	SM1
Phypoly-transcript-05637	3.62499e-76	4.02217	0.975	0.659	5.48099e-72	0	noGene	GO:0003676|GO:0003676	SAP domain|SAP motif profile.	Phypoly-transcript-05637	0.316	SM1
Phypoly-transcript-04037	5.68835e-77	4.01565	0.97	0.514	8.60079e-73	0	RAB1A_LYMST	GO:0005515|GO:0005525|GO:0007264	Ankyrin repeat profile.|Ras family	Phypoly-transcript-04037	0.456	SM1
Phypoly-transcript-09148	2.83249e-74	3.97965	0.985	0.884	4.28272e-70	0	noGene	GO:0003676	4012	Phypoly-transcript-09148	0.101	SM1
Phypoly-transcript-13030	1.10449e-73	3.93063	0.975	0.893	1.66999e-69	0	THY1_DICDI	GO:0006231|GO:0050660|GO:0050797|GO:0006231|GO:0050660|GO:0050797	Flavin-dependent thymidylate synthase (thyX) domain profile.|Thymidylate synthase complementing protein	Phypoly-transcript-13030	0.082	SM1
Phypoly-transcript-16516	1.24705e-80	3.92642	0.97	0.376	1.88554e-76	0	YPGQ_BACSU	GO:0008081|GO:0046872	1999	Phypoly-transcript-16516	0.594	SM1
Phypoly-transcript-16291	5.84355e-83	3.91835	0.964	0.272	8.83545e-79	0	KTHY_HUMAN	GO:0004798|GO:0005524|GO:0006233	4424	Phypoly-transcript-16291	0.692	SM1
Phypoly-transcript-12029	8.01305e-77	3.86787	0.975	0.61	1.21157e-72	0	noGene	GO:0005634|GO:0006974|GO:0007049|GO:0048478	3640	Phypoly-transcript-12029	0.365	SM1
Phypoly-transcript-15159	8.05109e-86	3.84448	0.964	0.246	1.21732e-81	0	noGene	GO:0003676|GO:0003676	SAP domain|SAP motif profile.	Phypoly-transcript-15159	0.718	SM1
Phypoly-transcript-08562	9.24261e-74	3.82568	0.97	0.777	1.39748e-69	0	TBAD_PHYPO	GO:0003924|GO:0005525|GO:0006184|GO:0043234|GO:0051258|GO:0005525|GO:0005874|GO:0007017	Tubulin C-terminal domain|Tubulin subunits alpha, beta, and gamma signature.	Phypoly-transcript-08562	0.193	SM1
Phypoly-transcript-00614	4.08e-85	3.76921	0.98	0.312	6.16895e-81	0	BUB1_ARATH	GO:0005524|GO:0004674|GO:0006468|GO:0004672|GO:0005524|GO:0006468|GO:0004672|GO:0005524|GO:0006468	Protein kinases ATP-binding region signature.|Serine/Threonine protein kinases active-site signature.|Protein kinase domain|Protein kinase domain profile.	Phypoly-transcript-00614	0.668	SM1
Phypoly-transcript-01158	2.12495e-82	3.71705	0.97	0.332	3.21292e-78	0	MPS1_DICDI	GO:0005524|GO:0004672|GO:0005524|GO:0006468|GO:0004674|GO:0006468|GO:0004672|GO:0005524|GO:0006468	Protein kinases ATP-binding region signature.|Protein kinase domain|Serine/Threonine protein kinases active-site signature.|Protein kinase domain profile.	Phypoly-transcript-01158	0.638	SM1
Phypoly-transcript-17752	1.10512e-87	3.70311	0.964	0.153	1.67095e-83	0	CDC20_DICDI	GO:0005515|GO:0005515|GO:0005515	Trp-Asp (WD) repeats profile.|WD domain, G-beta repeat|Trp-Asp (WD) repeats circular profile.	Phypoly-transcript-17752	0.811	SM1
Phypoly-transcript-03187	2.45846e-84	3.64052	0.98	0.327	3.71719e-80	0	CCR1_MAIZE	GO:0004672|GO:0005524|GO:0006468|GO:0005515|GO:0004674|GO:0006468|GO:0004672|GO:0005524|GO:0006468|GO:0005515|GO:0005524	Protein kinase domain profile.|POLO box duplicated region|Serine/Threonine protein kinases active-site signature.|Protein kinase domain|POLO box domain profile.|Protein kinases ATP-binding region signature.	Phypoly-transcript-03187	0.653	SM1
Phypoly-transcript-02937	2.3965e-93	3.63306	0.964	0.118	3.62351e-89	0	ATK4_ARATH	GO:0003777|GO:0005524|GO:0007018|GO:0003777|GO:0005524|GO:0007018|GO:0008017|GO:0003777|GO:0005524|GO:0007018|GO:0008017	Kinesin motor domain signature.|Kinesin motor domain profile.|Kinesin motor domain	Phypoly-transcript-02937	0.846	SM1
Phypoly-transcript-17230	2.98718e-87	3.61939	0.954	0.156	4.51661e-83	0	KITH_DICDI	GO:0004797|GO:0005524|GO:0004797|GO:0005524	Thymidine kinase|Thymidine kinase cellular-type signature.	Phypoly-transcript-17230	0.798	SM1
Phypoly-transcript-00395	5.51186e-73	3.59686	0.98	0.844	8.33393e-69	0	MCM6_DICDI	GO:0003677|GO:0005524|GO:0006260|GO:0003677|GO:0005524|GO:0006260|GO:0003677|GO:0005524|GO:0006260	MCM family domain profile.|MCM family signature.|MCM2/3/5 family	Phypoly-transcript-00395	0.136	SM1
Phypoly-transcript-01908	8.08585e-78	3.5956	0.98	0.512	1.22258e-73	0	DNLI1_DICDI	GO:0003909|GO:0051103|GO:0003910|GO:0006281|GO:0006310|GO:0003677|GO:0003910|GO:0006281|GO:0006310|GO:0003910|GO:0005524|GO:0006281|GO:0006310|GO:0003909|GO:0051103|GO:0003910|GO:0005524|GO:0006281|GO:0006310	ATP-dependent DNA ligase AMP-binding site.|ATP dependent DNA ligase C terminal region|DNA ligase N terminus|ATP dependent DNA ligase domain|ATP-dependent DNA ligase signature 2.|ATP-dependent DNA ligase family profile.	Phypoly-transcript-01908	0.468	SM1
Phypoly-transcript-04459	4.32888e-73	3.55595	0.964	0.867	6.54526e-69	0	RFA1A_ARATH	GO:0003676|GO:0003677|GO:0005634|GO:0006260	OB-fold nucleic acid binding domain|Replication factor-A protein 1, N-terminal domain	Phypoly-transcript-04459	0.097	SM1
Phypoly-transcript-14398	3.07529e-75	3.48414	0.97	0.61	4.64984e-71	0	ADRO_HUMAN	GO:0016787|GO:0046080	1335	Phypoly-transcript-14398	0.36	SM1
Phypoly-transcript-00135	3.58445e-83	3.47839	0.98	0.344	5.41969e-79	0	DPOE1_HUMAN	GO:0003887|GO:0005634|GO:0006260|GO:0008270|GO:0003887|GO:0006260|GO:0000166|GO:0003677|GO:0003887|GO:0006260	Domain of unknown function (DUF1744)|DNA polymerase family B, exonuclease domain|DNA polymerase family B	Phypoly-transcript-00135	0.636	SM1
Phypoly-transcript-01999	6.19504e-80	3.46254	0.975	0.413	9.3669e-76	0	MCM2_XENLA	GO:0003677|GO:0005524|GO:0006260|GO:0003677|GO:0005524|GO:0006260|GO:0003677|GO:0005524|GO:0006260|GO:0003677|GO:0003678|GO:0005524|GO:0005634|GO:0006270|GO:0042555	MCM2/3/5 family|MCM family signature.|MCM family domain profile.|Mini-chromosome maintenance protein 2	Phypoly-transcript-01999	0.562	SM1
Phypoly-transcript-13401	1.24978e-78	3.46147	0.954	0.327	1.88967e-74	0	RNH2B_XENLA	GO:0005634	4923	Phypoly-transcript-13401	0.627	SM1
Phypoly-transcript-05804	7.27543e-74	3.43523	0.964	0.688	1.10004e-69	0	APC7_DICDI	GO:0005515|GO:0005515|GO:0005515	TPR repeat profile.|Tetratricopeptide repeat|TPR repeat region circular profile.	Phypoly-transcript-05804	0.276	SM1
Phypoly-transcript-00976	5.81736e-83	3.42013	0.98	0.358	8.79584e-79	0	ATAD5_MOUSE	GO:0005524	426	Phypoly-transcript-00976	0.622	SM1
Phypoly-transcript-03384	1.58719e-73	3.41674	0.975	0.801	2.39983e-69	0	NAT_MYCTU	GO:0051260	553	Phypoly-transcript-03384	0.174	SM1
Phypoly-transcript-01484	9.77373e-85	3.35796	0.964	0.257	1.47779e-80	0	RQL5_ARATH	GO:0003676|GO:0004386|GO:0005524|GO:0003676|GO:0004386|GO:0005524|GO:0003676|GO:0005524|GO:0008026	Superfamilies 1 and 2 helicase C-terminal domain profile.|Helicase conserved C-terminal domain|DEAD/DEAH box helicase	Phypoly-transcript-01484	0.707	SM1
Phypoly-transcript-13407	3.26901e-77	3.35397	0.975	0.572	4.94274e-73	0	EB1C_ARATH	GO:0005515|GO:0005515|GO:0008017|GO:0008017	Calponin homology domain profile.|Calponin homology (CH) domain|EB1-like C-terminal motif|EB1-C terminal (EB1-C) domain profile.	Phypoly-transcript-13407	0.403	SM1
Phypoly-transcript-00494	1.8778e-73	3.34186	0.97	0.827	2.83923e-69	0	DPOLA_XENLA	GO:0000166|GO:0003676|GO:0003887|GO:0006139|GO:0003887|GO:0006260|GO:0001882|GO:0003887|GO:0006260|GO:0000166|GO:0003677|GO:0003887|GO:0006260	DNA polymerase family B signature.|DNA polymerase family B, exonuclease domain|DNA Polymerase alpha zinc finger|DNA polymerase family B	Phypoly-transcript-00494	0.143	SM1
Phypoly-transcript-26650	1.28585e-76	3.32949	0.975	0.636	1.94421e-72	0	noGene	GO:0003924|GO:0005525|GO:0003677|GO:0003677|GO:0003924|GO:0005525	Guanylate-binding protein, C-terminal domain|Thymopoietin protein|LEM-like domain profile.|Guanylate-binding protein, N-terminal domain	Phypoly-transcript-26650	0.339	SM1
Phypoly-transcript-07668	5.90613e-76	3.32736	0.97	0.457	8.93007e-72	0	NLRC3_HUMAN	GO:0005515	2337	Phypoly-transcript-07668	0.513	SM1
Phypoly-transcript-04975	4.19239e-88	3.32214	0.959	0.153	6.33889e-84	0	Y8646_DICDI	GO:0004672|GO:0005524|GO:0006468|GO:0004672|GO:0005524|GO:0006468	Protein kinase domain|Protein kinase domain profile.	Phypoly-transcript-04975	0.806	SM1
Phypoly-transcript-09051	8.28269e-75	3.31314	0.97	0.616	1.25234e-70	0	RFC4_DICDI	GO:0005524	426	Phypoly-transcript-09051	0.354	SM1
Phypoly-transcript-07599	9.17881e-77	3.27243	0.985	0.76	1.38784e-72	0	E2FB_ARATH	GO:0003700|GO:0005667|GO:0006355	1361	Phypoly-transcript-07599	0.225	SM1
Phypoly-transcript-01017	9.68745e-82	3.25817	0.97	0.298	1.46474e-77	0	ASPM_PONPY	GO:0005515|GO:0005515	IQ motif profile.|IQ calmodulin-binding motif	Phypoly-transcript-01017	0.672	SM1
Phypoly-transcript-03575	4.28616e-72	3.25566	0.97	0.809	6.48068e-68	0	MCM4_ARATH	GO:0003677|GO:0005524|GO:0006260|GO:0003677|GO:0005524|GO:0006260|GO:0003677|GO:0005524|GO:0006260	MCM family domain profile.|MCM family signature.|MCM2/3/5 family	Phypoly-transcript-03575	0.161	SM1
Phypoly-transcript-11601	2.85759e-81	3.2047	0.975	0.344	4.32068e-77	0	noGene	GO:0005634|GO:0006281	4909	Phypoly-transcript-11601	0.631	SM1
Phypoly-transcript-00797	1.05775e-75	3.1806	0.975	0.54	1.59931e-71	0	SMC3_ARATH	GO:0005515|GO:0005524|GO:0005694|GO:0051276|GO:0005524|GO:0016887	SMC proteins Flexible Hinge Domain|ABC transporters family signature.	Phypoly-transcript-00797	0.435	SM1
Phypoly-transcript-02289	1.03792e-73	3.16275	0.97	0.604	1.56934e-69	0	MSH2_DICDI	GO:0005524|GO:0006298|GO:0030983|GO:0005524|GO:0006298|GO:0030983|GO:0005524|GO:0006298|GO:0030983|GO:0005524|GO:0006298|GO:0030983|GO:0005524|GO:0006298|GO:0030983|GO:0005524|GO:0006298|GO:0030983	MutS domain I|MutS domain II|MutS family domain IV|MutS domain III|DNA mismatch repair proteins mutS family signature.|MutS domain V	Phypoly-transcript-02289	0.366	SM1
Phypoly-transcript-17984	2.21741e-73	3.15754	0.97	0.751	3.35273e-69	0	ASF1A_BOVIN	GO:0005634|GO:0006333	362	Phypoly-transcript-17984	0.219	SM1
Phypoly-transcript-00577	6.01414e-74	3.13572	0.97	0.676	9.09339e-70	0	RAD5_YARLI	GO:0003677|GO:0005524|GO:0005515|GO:0008270	SNF2 family N-terminal domain|Zinc finger RING-type profile.	Phypoly-transcript-00577	0.294	SM1
Phypoly-transcript-04858	1.61549e-77	3.11439	0.99	0.535	2.44262e-73	0	DUS9_HUMAN	GO:0006470|GO:0008138|GO:0004725|GO:0016311|GO:0016791|GO:0016311|GO:0016791|GO:0006470|GO:0008138	Dual specificity phosphatase, catalytic domain|Tyrosine specific protein phosphatases active site.|Tyrosine specific protein phosphatases family profile.|Dual specificity protein phosphatase family profile.	Phypoly-transcript-04858	0.455	SM1
Phypoly-transcript-17240	3.60431e-80	3.10615	0.97	0.358	5.44972e-76	0	noGene	GO:0005515|GO:0005515	Zinc finger PHD-type profile.|PHD-finger	Phypoly-transcript-17240	0.612	SM1
Phypoly-transcript-03446	1.67776e-78	3.08736	0.959	0.318	2.53678e-74	0	MIB2_HUMAN	GO:0005515|GO:0008270	4982	Phypoly-transcript-03446	0.641	SM1
Phypoly-transcript-18441	1.24155e-84	3.07931	0.929	0.098	1.87722e-80	0	FB293_ARATH	GO:0005515	1532	Phypoly-transcript-18441	0.831	SM1
Phypoly-transcript-02785	1.66448e-74	3.07384	0.975	0.592	2.5167e-70	0	noGene	GO:0005515|GO:0005515|GO:0005515	Tetratricopeptide repeat|TPR repeat profile.|TPR repeat region circular profile.	Phypoly-transcript-02785	0.383	SM1
Phypoly-transcript-02229	3.24265e-81	3.07367	0.975	0.324	4.90289e-77	0	PMS1_DICDI	GO:0005524|GO:0006298|GO:0005524|GO:0006298|GO:0030983	MutL C terminal dimerisation domain|DNA mismatch repair protein, C-terminal domain	Phypoly-transcript-02229	0.651	SM1
Phypoly-transcript-05308	1.30826e-73	3.05632	0.97	0.714	1.97809e-69	0	SPNA_DICDI	GO:0003824|GO:0004722|GO:0006470	Protein phosphatase 2C|Protein phosphatase 2C signature.	Phypoly-transcript-05308	0.256	SM1
Phypoly-transcript-02836	3.84049e-83	3.03487	0.985	0.312	5.80682e-79	0	KIF6_DICDI	GO:0003777|GO:0005524|GO:0007018|GO:0008017|GO:0005515|GO:0003777|GO:0005524|GO:0007018|GO:0008017|GO:0005515|GO:0003777|GO:0005524|GO:0007018	Kinesin motor domain profile.|SAM domain (Sterile alpha motif)|Kinesin motor domain|SAM domain profile.|Kinesin motor domain signature.	Phypoly-transcript-02836	0.673	SM1
Phypoly-transcript-02655	8.41069e-78	3.00351	0.98	0.402	1.2717e-73	0	RHP9_SCHPO	GO:0005515	1605	Phypoly-transcript-02655	0.578	SM1
Phypoly-transcript-09085	6.43339e-73	2.98212	0.964	0.639	9.72729e-69	0	XRCC4_DICDI	GO:0003677|GO:0005634|GO:0006302|GO:0006310	1108	Phypoly-transcript-09085	0.325	SM1
Phypoly-transcript-13257	2.65987e-76	2.97184	0.985	0.697	4.02172e-72	0	noGene	GO:0003677|GO:0006306|GO:0008168	562	Phypoly-transcript-13257	0.288	SM1
Phypoly-transcript-10357	4.1565e-77	2.96119	0.964	0.364	6.28462e-73	0	noGene	GO:0005515|GO:0005515|GO:0005515	WD domain, G-beta repeat|Trp-Asp (WD) repeats profile.|Trp-Asp (WD) repeats circular profile.	Phypoly-transcript-10357	0.6	SM1
Phypoly-transcript-13894	5.82457e-74	2.92898	0.99	0.757	8.80675e-70	0	CHRC1_HUMAN	GO:0005622|GO:0043565	2084	Phypoly-transcript-13894	0.233	SM1
Phypoly-transcript-23788	1.04722e-73	2.92587	0.98	0.777	1.5834e-69	0	noGene	GO:0005634|GO:0006260	1135	Phypoly-transcript-23788	0.203	SM1
Phypoly-transcript-08148	2.09209e-73	2.83594	0.98	0.607	3.16325e-69	0	HAT12_DICDI	GO:0008080|GO:0004402|GO:0016568	Acetyltransferase (GNAT) domain|Histone acetyl transferase HAT1 N-terminus	Phypoly-transcript-08148	0.373	SM1
Phypoly-transcript-15147	4.62632e-77	2.81176	0.934	0.173	6.99499e-73	0	noGene	GO:0004672|GO:0005524|GO:0006468	3265	Phypoly-transcript-15147	0.761	SM1
Phypoly-transcript-09868	2.63927e-72	2.75709	0.97	0.746	3.99057e-68	0	YL759_MIMIV	GO:0003677|GO:0003905|GO:0006284	2473	Phypoly-transcript-09868	0.224	SM1
Phypoly-transcript-00833	6.87478e-74	2.75097	0.975	0.604	1.03947e-69	0	SMC1A_MOUSE	GO:0005515|GO:0005524|GO:0005694|GO:0051276	4156	Phypoly-transcript-00833	0.371	SM1
Phypoly-transcript-12838	3.0843e-75	2.71792	0.975	0.416	4.66346e-71	0	AURK_DICDI	GO:0004672|GO:0005524|GO:0006468|GO:0004672|GO:0005524|GO:0006468|GO:0004674|GO:0006468|GO:0005524	Protein kinase domain profile.|Protein kinase domain|Serine/Threonine protein kinases active-site signature.|Protein kinases ATP-binding region signature.	Phypoly-transcript-12838	0.559	SM1
Phypoly-transcript-06666	4.06786e-59	2.70971	0.964	0.65	6.15061e-55	0	CDKA1_ORYSJ	GO:0005524|GO:0004674|GO:0006468|GO:0004672|GO:0005524|GO:0006468|GO:0004672|GO:0005524|GO:0006468	Protein kinases ATP-binding region signature.|Serine/Threonine protein kinases active-site signature.|Protein kinase domain profile.|Protein kinase domain	Phypoly-transcript-06666	0.314	SM1
Phypoly-transcript-00764	2.96941e-75	2.70949	0.964	0.364	4.48975e-71	0	ERC6L_BOVIN	GO:0003676|GO:0004386|GO:0005524|GO:0003677|GO:0005524|GO:0003676|GO:0004386|GO:0005524	Helicase conserved C-terminal domain|SNF2 family N-terminal domain|Superfamilies 1 and 2 helicase C-terminal domain profile.	Phypoly-transcript-00764	0.6	SM1
Phypoly-transcript-02073	2.40754e-70	2.69526	0.975	0.855	3.6402e-66	0	Y4695_DICDI	GO:0005515	4229	Phypoly-transcript-02073	0.12	SM1
Phypoly-transcript-01404	5.43457e-70	2.67119	0.975	0.934	8.21707e-66	0	IPO9_MOUSE	GO:0006886|GO:0008536|GO:0006886|GO:0008536	Importin-beta N-terminal domain|Importin-beta N-terminal domain profile.	Phypoly-transcript-01404	0.041	SM1
Phypoly-transcript-18509	1.44079e-73	2.60971	0.995	0.965	2.17847e-69	0	H2B4_CAEEL	GO:0003677	876	Phypoly-transcript-18509	0.03	SM1
Phypoly-transcript-04973	2.17697e-73	2.59752	0.995	0.815	3.29157e-69	0	PRC1_HUMAN	GO:0000226|GO:0000910|GO:0008017	2488	Phypoly-transcript-04973	0.18	SM1
Phypoly-transcript-02988	5.78862e-72	2.58301	0.98	0.526	8.7524e-68	0	MLH1_MOUSE	GO:0005524|GO:0006298|GO:0030983	1116	Phypoly-transcript-02988	0.454	SM1
Phypoly-transcript-16974	1.91468e-62	2.57076	0.904	0.344	2.895e-58	0	noGene	GO:0000775|GO:0005634|GO:0007049|GO:0007067	2502	Phypoly-transcript-16974	0.56	SM1
Phypoly-transcript-04731	7.47069e-71	2.55843	0.98	0.789	1.12957e-66	0	PRP2A_ORYSJ	GO:0003950|GO:0006471|GO:0003950|GO:0003950|GO:0003950|GO:0006471	PARP alpha-helical domain profile.|Poly(ADP-ribose) polymerase catalytic domain|PARP catalytic domain profile.|Poly(ADP-ribose) polymerase, regulatory domain	Phypoly-transcript-04731	0.191	SM1
Phypoly-transcript-00934	1.79328e-68	2.50661	0.949	0.425	2.71145e-64	0	RB_CHICK	GO:0005634|GO:0051726|GO:0005634|GO:0051726	Retinoblastoma-associated protein B domain|Retinoblastoma-associated protein A domain	Phypoly-transcript-00934	0.524	SM1
Phypoly-transcript-08362	7.27171e-68	2.50168	0.97	0.685	1.09948e-63	0	ENT8_ARATH	GO:0005337|GO:0006810|GO:0016021	2783	Phypoly-transcript-08362	0.285	SM1
Phypoly-transcript-09056	1.70446e-67	2.49624	0.97	0.734	2.57714e-63	0	NPHP3_DANRE	GO:0005515|GO:0005515	TPR repeat profile.|TPR repeat region circular profile.	Phypoly-transcript-09056	0.236	SM1
Phypoly-transcript-08916	3.33001e-72	2.48988	0.98	0.775	5.03497e-68	0	GLYC2_DICDI	GO:0004372|GO:0006544|GO:0006563|GO:0004372|GO:0006544|GO:0006563|GO:0030170	Serine hydroxymethyltransferase|Serine hydroxymethyltransferase pyridoxal-phosphate attachment site.	Phypoly-transcript-08916	0.205	SM1
Phypoly-transcript-00679	1.24256e-71	2.47543	0.98	0.827	1.87875e-67	0	RFC1_DICDI	GO:0005524|GO:0003689|GO:0005524|GO:0005663|GO:0006260	ATPase family associated with various cellular activities (AAA)|Replication factor RFC1 C terminal domain	Phypoly-transcript-00679	0.153	SM1
Phypoly-transcript-02670	5.99684e-70	2.46994	0.98	0.864	9.06722e-66	0	MCM3_ORYSJ	GO:0003677|GO:0005524|GO:0006260|GO:0003677|GO:0005524|GO:0006260|GO:0003677|GO:0005524|GO:0006260	MCM2/3/5 family|MCM family domain profile.|MCM family signature.	Phypoly-transcript-02670	0.116	SM1
Phypoly-transcript-04300	2.42276e-71	2.46679	0.944	0.341	3.66322e-67	0	APC4_ARATH	GO:0005515|GO:0005515	Trp-Asp (WD) repeats profile.|Trp-Asp (WD) repeats circular profile.	Phypoly-transcript-04300	0.603	SM1
Phypoly-transcript-00639	5.62607e-74	2.45872	0.995	0.89	8.50662e-70	0	K125_TOBAC	GO:0003777|GO:0005524|GO:0007018|GO:0008017|GO:0003777|GO:0005524|GO:0007018|GO:0003777|GO:0005524|GO:0007018|GO:0008017	Kinesin motor domain profile.|Kinesin motor domain signature.|Kinesin motor domain	Phypoly-transcript-00639	0.105	SM1
Phypoly-transcript-06944	1.17704e-68	2.45287	0.985	0.803	1.77968e-64	0	CANB1_DICDI	GO:0005509|GO:0005509|GO:0005509|GO:0005578|GO:0007165	EF-hand calcium-binding domain profile.|EF-hand domain|Secreted protein acidic and rich in cysteine Ca binding region	Phypoly-transcript-06944	0.182	SM1
Phypoly-transcript-02956	3.83129e-68	2.44775	0.985	0.908	5.79291e-64	0	STS1_SCHPO	GO:0016020|GO:0016628|GO:0055114|GO:0016628|GO:0055114	Ergosterol biosynthesis ERG4/ERG24 family|Sterol reductase family signature 2.|Sterol reductase family signature 1.	Phypoly-transcript-02956	0.077	SM1
Phypoly-transcript-01482	5.41773e-71	2.44399	0.975	0.864	8.1916e-67	0	CHD4_MOUSE	GO:0005515|GO:0005515	Zinc finger PHD-type profile.|PHD-finger	Phypoly-transcript-01482	0.111	SM1
Phypoly-transcript-07205	3.29803e-68	2.43266	0.97	0.749	4.98662e-64	0	BCS1B_DICDI	GO:0005524	426	Phypoly-transcript-07205	0.221	SM1
Phypoly-transcript-06839	1.10471e-66	2.42148	0.964	0.662	1.67031e-62	0	ORN_BOVIN	GO:0055085	4659	Phypoly-transcript-06839	0.302	SM1
Phypoly-transcript-10995	7.90094e-68	2.40667	0.975	0.766	1.19462e-63	0	RFC5_MOUSE	GO:0005524	426	Phypoly-transcript-10995	0.209	SM1
Phypoly-transcript-03498	1.4188e-68	2.40185	0.985	0.777	2.14523e-64	0	MCM7_ARATH	GO:0003677|GO:0005524|GO:0006260|GO:0003677|GO:0005524|GO:0006260|GO:0003677|GO:0005524|GO:0006260	MCM2/3/5 family|MCM family domain profile.|MCM family signature.	Phypoly-transcript-03498	0.208	SM1
Phypoly-transcript-00816	1.39275e-76	2.39816	0.975	0.329	2.10584e-72	0	SM3L2_ARATH	GO:0003676|GO:0004386|GO:0005524|GO:0005515|GO:0008270|GO:0003676|GO:0004386|GO:0005524|GO:0003677|GO:0005524	Superfamilies 1 and 2 helicase C-terminal domain profile.|Zinc finger RING-type profile.|Helicase conserved C-terminal domain|SNF2 family N-terminal domain	Phypoly-transcript-00816	0.646	SM1
Phypoly-transcript-09677	2.99262e-72	2.38615	0.98	0.803	4.52484e-68	0	CCNA_HYDVD	GO:0005634	929	Phypoly-transcript-09677	0.177	SM1
Phypoly-transcript-11156	3.76676e-72	2.37252	0.98	0.775	5.69535e-68	0	H2A_SIPNU	GO:0003677|GO:0000786|GO:0003677|GO:0005634|GO:0006334	Core histone H2A/H2B/H3/H4|Histone H2A signature.	Phypoly-transcript-11156	0.205	SM1
Phypoly-transcript-08036	5.76963e-65	2.3633	0.949	0.468	8.72367e-61	0	NTPES_BACSU	GO:0016787|GO:0009166|GO:0016787	Calcineurin-like phosphoesterase|5'-nucleotidase, C-terminal domain	Phypoly-transcript-08036	0.481	SM1
Phypoly-transcript-01463	1.03012e-66	2.3545	0.99	0.824	1.55754e-62	0	COIL_MOUSE	GO:0003677|GO:0008270|GO:0003677|GO:0008270	Poly(ADP-ribose) polymerase and DNA-Ligase Zn-finger region|Poly(ADP-ribose) polymerase zinc finger domain profile.	Phypoly-transcript-01463	0.166	SM1
Phypoly-transcript-02734	7.99838e-69	2.35279	0.964	0.575	1.20935e-64	0	TENX_HUMAN	GO:0005515|GO:0007154|GO:0016020	EGF-like domain profile.|DSL domain profile.	Phypoly-transcript-02734	0.389	SM1
Phypoly-transcript-03517	9.1361e-67	2.33226	0.954	0.298	1.38138e-62	0	DPOA2_MOUSE	GO:0003677|GO:0003887|GO:0006260	1124	Phypoly-transcript-03517	0.656	SM1
Phypoly-transcript-00559	1.68047e-67	2.32945	0.985	0.91	2.54087e-63	0	SPT16_DICDI	GO:0005097|GO:0032313|GO:0005097|GO:0032313	Rab-GTPase-TBC domain|TBC/rab GAP domain profile.	Phypoly-transcript-00559	0.075	SM1
Phypoly-transcript-03923	1.26722e-64	2.32371	0.959	0.642	1.91603e-60	0	CND2_ARATH	GO:0000796|GO:0007076	852	Phypoly-transcript-03923	0.317	SM1
Phypoly-transcript-05380	2.12538e-67	2.30864	0.964	0.775	3.21358e-63	0	noGene	GO:0005509|GO:0005509	EF-hand domain pair|EF-hand calcium-binding domain profile.	Phypoly-transcript-05380	0.189	SM1
Phypoly-transcript-01494	7.23137e-69	2.30606	0.99	0.769	1.09338e-64	0	SMRCD_XENTR	GO:0003677|GO:0005524|GO:0003676|GO:0004386|GO:0005524|GO:0003676|GO:0004386|GO:0005524	SNF2 family N-terminal domain|Superfamilies 1 and 2 helicase C-terminal domain profile.|Helicase conserved C-terminal domain	Phypoly-transcript-01494	0.221	SM1
Phypoly-transcript-01670	8.21954e-77	2.28992	0.959	0.231	1.24279e-72	0	CTF18_XENLA	GO:0005524	426	Phypoly-transcript-01670	0.728	SM1
Phypoly-transcript-04407	2.34551e-68	2.28785	0.944	0.338	3.54642e-64	0	GCP4_HUMAN	GO:0000226|GO:0000922|GO:0005815	4195	Phypoly-transcript-04407	0.606	SM1
Phypoly-transcript-04493	1.79237e-70	2.2859	0.98	0.855	2.71007e-66	0	NEK2_DICDI	GO:0004672|GO:0005524|GO:0006468|GO:0004674|GO:0006468|GO:0004672|GO:0005524|GO:0006468	Protein kinase domain|Serine/Threonine protein kinases active-site signature.|Protein kinase domain profile.	Phypoly-transcript-04493	0.125	SM1
Phypoly-transcript-11121	5.88512e-63	2.27	0.959	0.679	8.8983e-59	0	noGene	GO:0008270|GO:0008270	Zinc finger RanBP2 type profile.|Zinc finger RanBP2-type signature.	Phypoly-transcript-11121	0.28	SM1
Phypoly-transcript-04937	1.83027e-69	2.2677	0.98	0.867	2.76736e-65	0	TNNC_TACTR	GO:0005509|GO:0005509	EF-hand domain pair|EF-hand calcium-binding domain profile.	Phypoly-transcript-04937	0.113	SM1
Phypoly-transcript-09900	6.25816e-74	2.26252	0.975	0.266	9.46234e-70	0	TENX_HUMAN	GO:0005515	1382	Phypoly-transcript-09900	0.709	SM1
Phypoly-transcript-09397	3.35134e-53	2.24045	0.893	0.402	5.06723e-49	0	IMA1A_ORYSJ	GO:0005515|GO:0005515	Armadillo/beta-catenin-like repeat|Armadillo/plakoglobin ARM repeat profile.	Phypoly-transcript-09397	0.491	SM1
Phypoly-transcript-07027	6.04706e-69	2.23885	0.934	0.26	9.14316e-65	0	SPI1_SCHPO	GO:0003924|GO:0005525|GO:0006184|GO:0006886|GO:0006913|GO:0007165|GO:0005525|GO:0007264	small GTPase Ran family profile.|Ras family	Phypoly-transcript-07027	0.674	SM1
Phypoly-transcript-00789	1.9966e-63	2.23845	0.964	0.682	3.01886e-59	0	SMCA5_HUMAN	GO:0003676|GO:0005524|GO:0005634|GO:0006338|GO:0016818|GO:0003676|GO:0004386|GO:0005524|GO:0003677|GO:0005524|GO:0003676|GO:0004386|GO:0005524|GO:0016817	SLIDE|Helicase conserved C-terminal domain|SNF2 family N-terminal domain|Superfamilies 1 and 2 helicase C-terminal domain profile.|DNA-binding domain	Phypoly-transcript-00789	0.282	SM1
Phypoly-transcript-21486	4.59128e-60	2.2339	0.944	0.569	6.94202e-56	0	Y3031_YERPE	GO:0008080|GO:0008080	Gcn5-related N-acetyltransferase (GNAT) domain profile.|Acetyltransferase (GNAT) domain	Phypoly-transcript-21486	0.375	SM1
Phypoly-transcript-01379	5.26108e-72	2.21453	0.995	0.841	7.95475e-68	0	MCL1_SCHPO	GO:0005515|GO:0005515|GO:0005515	Trp-Asp (WD) repeats circular profile.|WD domain, G-beta repeat|Trp-Asp (WD) repeats profile.	Phypoly-transcript-01379	0.154	SM1
Phypoly-transcript-00858	9.04151e-67	2.21138	0.98	0.806	1.36708e-62	0	TRPM2_MOUSE	GO:0005216|GO:0006811|GO:0016020|GO:0055085	2221	Phypoly-transcript-00858	0.174	SM1
Phypoly-transcript-05966	4.9463e-66	2.20252	0.97	0.818	7.47881e-62	0	FZR2_ARATH	GO:0005515|GO:0005515|GO:0005515	Trp-Asp (WD) repeats circular profile.|Trp-Asp (WD) repeats profile.|WD domain, G-beta repeat	Phypoly-transcript-05966	0.152	SM1
Phypoly-transcript-17849	5.1051e-61	2.19791	0.954	0.477	7.71892e-57	0	H32_ENCAL	GO:0003677|GO:0000786|GO:0003677|GO:0006334|GO:0000786|GO:0003677|GO:0006334	Core histone H2A/H2B/H3/H4|Histone H3 signature 1.|Histone H3 signature 2.	Phypoly-transcript-17849	0.477	SM1
Phypoly-transcript-17168	4.48078e-69	2.19378	0.975	0.783	6.77493e-65	0	MSPD1_BOVIN	GO:0005198|GO:0005198	Major sperm protein (MSP) domain profile.|MSP (Major sperm protein) domain	Phypoly-transcript-17168	0.192	SM1
Phypoly-transcript-13604	8.91619e-67	2.1769	0.964	0.671	1.34813e-62	0	PE191_ARATH	GO:0005777	2973	Phypoly-transcript-13604	0.293	SM1
Phypoly-transcript-00168	7.64722e-65	2.17438	0.975	0.87	1.15626e-60	0	MRP1_MOUSE	GO:0005524|GO:0016887|GO:0005524|GO:0006810|GO:0016021|GO:0042626|GO:0055085|GO:0005524|GO:0006810|GO:0016021|GO:0042626|GO:0055085|GO:0005524|GO:0016887|GO:0005524|GO:0016887	ABC transporters family signature.|ABC transporter transmembrane region|ABC transporter integral membrane type-1 fused domain profile.|ATP-binding cassette, ABC transporter-type domain profile.|ABC transporter	Phypoly-transcript-00168	0.105	SM1
Phypoly-transcript-00914	9.15618e-64	2.17065	0.959	0.699	1.38441e-59	0	VILD_DICDI	GO:0003779|GO:0007010|GO:0003779|GO:0007010	Headpiece (HP) domain profile.|Villin headpiece domain	Phypoly-transcript-00914	0.26	SM1
Phypoly-transcript-06970	1.55027e-57	2.16696	0.939	0.598	2.34401e-53	0	S47A1_XENTR	GO:0006855|GO:0015238|GO:0015297|GO:0016020|GO:0055085	2424	Phypoly-transcript-06970	0.341	SM1
Phypoly-transcript-11277	3.07617e-66	2.16598	0.893	0.217	4.65117e-62	0	GPMA_CYTH3	GO:0003824|GO:0008152|GO:0003755|GO:0006457	Phosphoglycerate mutase family phosphohistidine signature.|Cyclophilin type peptidyl-prolyl cis-trans isomerase/CLD	Phypoly-transcript-11277	0.676	SM1
Phypoly-transcript-03337	7.32566e-67	2.15796	0.964	0.465	1.10764e-62	0	DNLI_HAEIN	GO:0003910|GO:0005524|GO:0006281|GO:0006310	383	Phypoly-transcript-03337	0.499	SM1
Phypoly-transcript-01435	4.05082e-63	2.15243	0.964	0.63	6.12484e-59	0	XPO2_ORENI	GO:0006886|GO:0008536|GO:0006886|GO:0008536|GO:0006886|GO:0005515	Importin-beta N-terminal domain profile.|Importin-beta N-terminal domain|Cse1|CAS/CSE protein, C-terminus	Phypoly-transcript-01435	0.334	SM1
Phypoly-transcript-05069	8.32535e-60	2.15003	0.939	0.494	1.25879e-55	0	GEM1_CRYNJ	GO:0005509|GO:0005525|GO:0007264|GO:0005525|GO:0005622|GO:0007264	EF-hand calcium-binding domain profile.|Ras family|Miro domain profilee.	Phypoly-transcript-05069	0.445	SM1
Phypoly-transcript-20731	1.20472e-63	2.1442	0.964	0.725	1.82154e-59	0	FKB59_DROME	GO:0006457|GO:0006457	FKBP-type peptidyl-prolyl cis-trans isomerase|FKBP-type peptidyl-prolyl cis-trans isomerase domain profile.	Phypoly-transcript-20731	0.239	SM1
Phypoly-transcript-17707	1.70165e-56	2.13305	0.929	0.523	2.5729e-52	0	SAT2_BOVIN	GO:0008080|GO:0008080	Gcn5-related N-acetyltransferase (GNAT) domain profile.|Acetyltransferase (GNAT) family	Phypoly-transcript-17707	0.406	SM1
Phypoly-transcript-04676	5.09072e-69	2.12832	0.975	0.488	7.69717e-65	0	TRB5_ARATH	GO:0003682	2599	Phypoly-transcript-04676	0.487	SM1
Phypoly-transcript-13929	2.8545e-58	2.11043	0.954	0.659	4.316e-54	0	YCP6_SCHPO	GO:0008152|GO:0016491	4110	Phypoly-transcript-13929	0.295	SM1
Phypoly-transcript-02059	1.3413e-60	2.10494	0.975	0.772	2.02804e-56	0	PARP1_BOVIN	GO:0003677|GO:0008270|GO:0003677|GO:0008270|GO:0003950|GO:0006471|GO:0003950|GO:0003950|GO:0003950|GO:0005634|GO:0003950|GO:0006471	Poly(ADP-ribose) polymerase and DNA-Ligase Zn-finger region|Poly(ADP-ribose) polymerase zinc finger domain profile.|Poly(ADP-ribose) polymerase, regulatory domain|Poly(ADP-ribose) polymerase catalytic domain|PARP catalytic domain profile.|PADR1 (NUC008) domain|PARP alpha-helical domain profile.	Phypoly-transcript-02059	0.203	SM1
Phypoly-transcript-10574	4.25622e-52	2.08499	0.888	0.422	6.4354e-48	0	ALLC_PSESM	GO:0000256|GO:0004037	220	Phypoly-transcript-10574	0.466	SM1
Phypoly-transcript-16245	5.7245e-66	2.07096	0.964	0.757	8.65544e-62	0	CALML_DICDI	GO:0005509|GO:0005509	EF-hand calcium-binding domain profile.|EF-hand domain pair	Phypoly-transcript-16245	0.207	SM1
Phypoly-transcript-23282	1.7142e-59	2.06864	0.944	0.549	2.59188e-55	0	YGU5_SCHPO	GO:0008270|GO:0008270	CHY zinc finger|Zinc finger CHY-type profile.	Phypoly-transcript-23282	0.395	SM1
Phypoly-transcript-01724	2.72565e-72	2.05302	0.959	0.301	4.12118e-68	0	CTDS_DICDI	GO:0005515|GO:0005515	NLI interacting factor-like phosphatase|FCP1 homology domain profile.	Phypoly-transcript-01724	0.658	SM1
Phypoly-transcript-02662	3.04598e-61	2.04553	0.964	0.714	4.60551e-57	0	FHKD_DICDI	GO:0005515|GO:0004672|GO:0005524|GO:0006468|GO:0004674|GO:0006468|GO:0005515|GO:0004672|GO:0005524|GO:0006468|GO:0005524	FHA domain|Protein kinase domain|Serine/Threonine protein kinases active-site signature.|Forkhead-associated (FHA) domain profile.|Protein kinase domain profile.|Protein kinases ATP-binding region signature.	Phypoly-transcript-02662	0.25	SM1
Phypoly-transcript-15269	1.57322e-51	2.04335	0.924	0.645	2.37871e-47	0	GLYR2_ARATH	GO:0004616|GO:0006098|GO:0055114|GO:0006573|GO:0008442|GO:0055114	NAD binding domain of 6-phosphogluconate dehydrogenase|3-hydroxyisobutyrate dehydrogenase signature.	Phypoly-transcript-15269	0.279	SM1
Phypoly-transcript-05191	3.30796e-68	2.038	0.99	0.916	5.00163e-64	0	SSRP1_DICDI	GO:0016787	253	Phypoly-transcript-05191	0.074	SM1
Phypoly-transcript-06052	4.15104e-66	2.02834	0.975	0.812	6.27637e-62	0	HUTH_HUMAN	GO:0009058|GO:0016841|GO:0016841	Aromatic amino acid lyase|Phenylalanine and histidine ammonia-lyases signature.	Phypoly-transcript-06052	0.163	SM1
Phypoly-transcript-15545	5.73641e-64	2.02674	0.878	0.162	8.67345e-60	0	BRPF1_HUMAN	GO:0005515	4975	Phypoly-transcript-15545	0.716	SM1
Phypoly-transcript-16185	2.14482e-57	2.0126	0.959	0.647	3.24296e-53	0	ING4_HUMAN	GO:0005515|GO:0005515	PHD-finger|Zinc finger PHD-type profile.	Phypoly-transcript-16185	0.312	SM1
Phypoly-transcript-07514	1.69165e-67	2.0044	0.99	0.882	2.55777e-63	0	PNKP_HUMAN	GO:0003676|GO:0003676	SAP domain|SAP motif profile.	Phypoly-transcript-07514	0.108	SM1
Phypoly-transcript-09459	5.86937e-60	2.00209	0.959	0.592	8.87449e-56	0	Y6398_DICDI	GO:0004674|GO:0006468|GO:0004672|GO:0005524|GO:0006468|GO:0004672|GO:0005524|GO:0006468|GO:0005524	Serine/Threonine protein kinases active-site signature.|Protein kinase domain|Protein kinase domain profile.|Protein kinases ATP-binding region signature.	Phypoly-transcript-09459	0.367	SM1
Phypoly-transcript-10518	7.89473e-62	1.99643	0.919	0.332	1.19368e-57	0	noGene	GO:0005515	1532	Phypoly-transcript-10518	0.587	SM1
Phypoly-transcript-04865	2.78931e-63	1.98116	0.98	0.824	4.21744e-59	0	PYRG_DICDI	GO:0003883|GO:0006221	900	Phypoly-transcript-04865	0.156	SM1
Phypoly-transcript-22341	3.03101e-57	1.98048	0.934	0.512	4.58288e-53	0	8ODP_RAT	GO:0016787|GO:0016787	Nudix hydrolase domain profile.|NUDIX domain	Phypoly-transcript-22341	0.422	SM1
Phypoly-transcript-11446	9.51726e-64	1.97946	0.97	0.72	1.43901e-59	0	RAD51_CHICK	GO:0003677|GO:0005524|GO:0006259|GO:0008094|GO:0003677|GO:0005524|GO:0006259|GO:0008094	RecA family profile 1.|RecA family profile 2.	Phypoly-transcript-11446	0.25	SM1
Phypoly-transcript-08810	5.07842e-67	1.96919	0.975	0.72	7.67857e-63	0	noGene	GO:0008080|GO:0008080	Acetyltransferase (GNAT) family|Gcn5-related N-acetyltransferase (GNAT) domain profile.	Phypoly-transcript-08810	0.255	SM1
Phypoly-transcript-10880	7.80887e-66	1.96438	0.98	0.792	1.1807e-61	0	ZDP_ARATH	GO:0003676|GO:0003676	SAP domain|SAP motif profile.	Phypoly-transcript-10880	0.188	SM1
Phypoly-transcript-03980	4.34845e-59	1.94948	0.975	0.798	6.57485e-55	0	TERF1_CRIGR	GO:0003682	2599	Phypoly-transcript-03980	0.177	SM1
Phypoly-transcript-27893	1.41357e-63	1.948	0.97	0.72	2.13732e-59	0	noGene	GO:0003924|GO:0005525	1972	Phypoly-transcript-27893	0.25	SM1
Phypoly-transcript-12370	7.98536e-65	1.94135	0.964	0.618	1.20739e-60	0	MUTYH_RAT	GO:0006284|GO:0003677	HhH-GPD superfamily base excision DNA repair protein|Helix-hairpin-helix motif	Phypoly-transcript-12370	0.346	SM1
Phypoly-transcript-03770	5.3691e-63	1.94025	0.914	0.298	8.11808e-59	0	DNLI_HAEIN	GO:0003910|GO:0005524|GO:0006281|GO:0006310|GO:0003909|GO:0051103|GO:0003910|GO:0005524|GO:0006281|GO:0006310	ATP dependent DNA ligase domain|ATP-dependent DNA ligase signature 2.|ATP-dependent DNA ligase family profile.	Phypoly-transcript-03770	0.616	SM1
Phypoly-transcript-07497	3.9715e-65	1.93257	0.985	0.789	6.00491e-61	0	RNB3L_HUMAN	GO:0005643|GO:0046907|GO:0046907	NUP50 (Nucleoporin 50 kDa)|Ran binding domain type 1 profile.|RanBP1 domain	Phypoly-transcript-07497	0.196	SM1
Phypoly-transcript-07074	2.44801e-54	1.92567	0.954	0.587	3.70138e-50	0	noGene	GO:0005515|GO:0005543|GO:0005938|GO:0032065	2448	Phypoly-transcript-07074	0.367	SM1
Phypoly-transcript-05487	1.85152e-63	1.92383	0.985	0.864	2.7995e-59	0	T2FA_DICDI	GO:0003677|GO:0005634|GO:0045893	4488	Phypoly-transcript-05487	0.121	SM1
Phypoly-transcript-02690	8.61487e-53	1.92314	0.944	0.688	1.30257e-48	0	DNLI_HAEIN	GO:0003910|GO:0005524|GO:0006281|GO:0006310|GO:0003910|GO:0005524|GO:0006281|GO:0006310	ATP-dependent DNA ligase family profile.|ATP dependent DNA ligase domain	Phypoly-transcript-02690	0.256	SM1
Phypoly-transcript-10981	1.94968e-57	1.92299	0.944	0.523	2.94791e-53	0	OPR1_ORYSJ	GO:0010181|GO:0016491|GO:0055114	2684	Phypoly-transcript-10981	0.421	SM1
Phypoly-transcript-11057	1.06669e-61	1.92274	0.934	0.367	1.61283e-57	0	ORC6_ARATH	GO:0003677|GO:0005664|GO:0006260	2828	Phypoly-transcript-11057	0.567	SM1
Phypoly-transcript-06998	6.92661e-72	1.92121	0.995	0.913	1.0473e-67	0	DEK_MOUSE	GO:0003676	4012	Phypoly-transcript-06998	0.082	SM1
Phypoly-transcript-12162	6.9433e-59	1.91764	0.954	0.483	1.04983e-54	0	MYBO_DICDI	GO:0003682	2599	Phypoly-transcript-12162	0.471	SM1
Phypoly-transcript-16825	6.5213e-66	1.91747	0.985	0.858	9.8602e-62	0	H33_TETPY	GO:0003677	876	Phypoly-transcript-16825	0.127	SM1
Phypoly-transcript-14740	1.21616e-59	1.91359	0.97	0.694	1.83884e-55	0	TBC8B_DANRE	GO:0005097|GO:0032313|GO:0005097|GO:0032313	TBC/rab GAP domain profile.|Rab-GTPase-TBC domain	Phypoly-transcript-14740	0.276	SM1
Phypoly-transcript-06175	1.59552e-55	1.90347	0.934	0.5	2.41243e-51	0	LRC40_CHICK	GO:0005515|GO:0005515	Leucine-rich repeat profile.|Leucine Rich Repeat	Phypoly-transcript-06175	0.434	SM1
Phypoly-transcript-01561	1.77661e-60	1.89986	0.975	0.855	2.68624e-56	0	MTMR2_BOVIN	GO:0016311|GO:0016791|GO:0016311|GO:0016791	Myotubularin-like phosphatase domain|Myotubularin phosphatase domain.	Phypoly-transcript-01561	0.12	SM1
Phypoly-transcript-03062	1.9629e-63	1.89832	0.985	0.832	2.96791e-59	0	FGD4_HUMAN	GO:0005085|GO:0035556|GO:0005089|GO:0035023|GO:0005089|GO:0035023	Dbl homology (DH) domain signature.|Dbl homology (DH) domain profile.|RhoGEF domain	Phypoly-transcript-03062	0.153	SM1
Phypoly-transcript-01929	1.79858e-55	1.89312	0.959	0.746	2.71945e-51	0	DNLI_HAEIN	GO:0003910|GO:0005524|GO:0006281|GO:0006310	383	Phypoly-transcript-01929	0.213	SM1
Phypoly-transcript-03079	1.64172e-52	1.88346	0.944	0.538	2.48229e-48	0	NEDD1_MOUSE	GO:0005515|GO:0005515|GO:0005515	Trp-Asp (WD) repeats profile.|Trp-Asp (WD) repeats circular profile.|WD domain, G-beta repeat	Phypoly-transcript-03079	0.406	SM1
Phypoly-transcript-10414	1.06504e-50	1.88208	0.888	0.41	1.61033e-46	0	RUFY2_MOUSE	GO:0046872	1700	Phypoly-transcript-10414	0.478	SM1
Phypoly-transcript-06745	1.83552e-62	1.88169	0.97	0.879	2.77531e-58	0	P2C80_ARATH	GO:0003824	4244	Phypoly-transcript-06745	0.091	SM1
Phypoly-transcript-00319	4.30202e-64	1.88096	0.964	0.598	6.50465e-60	0	YR883_MIMIV	GO:0005515|GO:0005515	Ankyrin repeat profile.|Ankyrin repeat	Phypoly-transcript-00319	0.366	SM1
Phypoly-transcript-02733	3.25547e-61	1.87947	0.954	0.488	4.92226e-57	0	PIF1_XENLA	GO:0003676|GO:0008270|GO:0000723|GO:0003678|GO:0006281|GO:0003676|GO:0008270	Zinc knuckle|PIF1-like helicase|Zinc finger CCHC-type profile.	Phypoly-transcript-02733	0.466	SM1
Phypoly-transcript-03437	2.10365e-63	1.87822	0.98	0.858	3.18072e-59	0	noGene	GO:0005515	1532	Phypoly-transcript-03437	0.122	SM1
Phypoly-transcript-02491	1.95601e-61	1.87703	0.975	0.777	2.95749e-57	0	ISN1_YARLI	GO:0000287|GO:0009117|GO:0016791	2170	Phypoly-transcript-02491	0.198	SM1
Phypoly-transcript-16057	5.3156e-67	1.87492	0.98	0.853	8.03719e-63	0	SM16_SCHMA	GO:0005509|GO:0005509|GO:0005509	EF-hand calcium-binding domain profile.|EF-hand domain|EF-hand domain pair	Phypoly-transcript-16057	0.127	SM1
Phypoly-transcript-16119	6.68583e-40	1.86205	0.685	0.165	1.0109e-35	0	noGene	GO:0005515	1648	Phypoly-transcript-16119	0.52	SM1
Phypoly-transcript-12653	2.20711e-48	1.86016	0.909	0.552	3.33715e-44	0	BUB3_PONAB	GO:0005515|GO:0005515|GO:0005515	Trp-Asp (WD) repeats circular profile.|Trp-Asp (WD) repeats profile.|WD domain, G-beta repeat	Phypoly-transcript-12653	0.357	SM1
Phypoly-transcript-03702	6.85999e-55	1.85251	0.949	0.569	1.03723e-50	0	SUT41_ARATH	GO:0008272|GO:0015116|GO:0016021	4284	Phypoly-transcript-03702	0.38	SM1
Phypoly-transcript-02210	2.94443e-61	1.84797	0.985	0.858	4.45198e-57	0	I5P2_MOUSE	GO:0007165|GO:0007165	RhoGAP domain|Rho GTPase-activating proteins domain profile.	Phypoly-transcript-02210	0.127	SM1
Phypoly-transcript-14841	3.93289e-63	1.84603	0.985	0.896	5.94654e-59	0	CCD25_XENTR	GO:0005515|GO:0005515	Ankyrin repeat profile.|Ankyrin repeat	Phypoly-transcript-14841	0.089	SM1
Phypoly-transcript-07002	1.59011e-56	1.84435	0.99	0.85	2.40425e-52	0	noGene	GO:0005509|GO:0005509	EF-hand domain pair|EF-hand calcium-binding domain profile.	Phypoly-transcript-07002	0.14	SM1
Phypoly-transcript-01988	1.20811e-60	1.84396	0.98	0.558	1.82666e-56	0	RQL3_ARATH	GO:0003676|GO:0004386|GO:0005524|GO:0003676|GO:0005524|GO:0008026|GO:0003676|GO:0004386|GO:0005524	Superfamilies 1 and 2 helicase C-terminal domain profile.|DEAD/DEAH box helicase|Helicase conserved C-terminal domain	Phypoly-transcript-01988	0.422	SM1
Phypoly-transcript-02224	8.611e-59	1.82809	0.98	0.728	1.30198e-54	0	DNLI_HAEIN	GO:0003910|GO:0005524|GO:0006281|GO:0006310	383	Phypoly-transcript-02224	0.252	SM1
Phypoly-transcript-13268	4.62282e-59	1.82708	0.964	0.584	6.9897e-55	0	noGene	GO:0008152|GO:0016491	4110	Phypoly-transcript-13268	0.38	SM1
Phypoly-transcript-08559	2.49239e-62	1.82589	0.97	0.832	3.7685e-58	0	TBG_PHYPA	GO:0003924|GO:0005525|GO:0006184|GO:0043234|GO:0051258|GO:0005525|GO:0005874|GO:0007017	Tubulin C-terminal domain|Tubulin subunits alpha, beta, and gamma signature.	Phypoly-transcript-08559	0.138	SM1
Phypoly-transcript-10810	4.25271e-60	1.81937	0.975	0.766	6.4301e-56	0	Y5521_DICDI	GO:0046872|GO:0005515|GO:0008270	Zinc finger, C3HC4 type (RING finger)|Zinc finger RING-type profile.	Phypoly-transcript-10810	0.209	SM1
Phypoly-transcript-01124	8.07275e-61	1.8131	0.975	0.772	1.2206e-56	0	EXOSX_HUMAN	GO:0003676|GO:0006139|GO:0008408|GO:0003676|GO:0005622|GO:0003676|GO:0005622|GO:0000176|GO:0006396	3'-5' exonuclease|HRDC domain profile.|HRDC domain|PMC2NT (NUC016) domain	Phypoly-transcript-01124	0.203	SM1
Phypoly-transcript-11889	6.23886e-49	1.80993	0.898	0.416	9.43316e-45	0	CAPTD_DICDI	GO:0008654|GO:0016020|GO:0016780|GO:0008654|GO:0016020|GO:0016780	CDP-alcohol phosphatidyltransferases signature.|CDP-alcohol phosphatidyltransferase	Phypoly-transcript-11889	0.482	SM1
Phypoly-transcript-08205	9.49577e-52	1.80856	0.949	0.665	1.43576e-47	0	WDR34_MOUSE	GO:0005515|GO:0005515|GO:0005515	Trp-Asp (WD) repeats circular profile.|Trp-Asp (WD) repeats profile.|WD domain, G-beta repeat	Phypoly-transcript-08205	0.284	SM1
Phypoly-transcript-02841	9.99881e-62	1.80844	0.98	0.913	1.51182e-57	0	noGene	GO:0005524|GO:0016887|GO:0016020|GO:0005524|GO:0016887|GO:0005524|GO:0016887	ATP-binding cassette, ABC transporter-type domain profile.|ABC-2 type transporter|ABC transporters family signature.|ABC transporter	Phypoly-transcript-02841	0.067	SM1
Phypoly-transcript-01437	3.42989e-61	1.79705	0.97	0.827	5.18599e-57	0	UBA6_HUMAN	GO:0003824|GO:0005524|GO:0006464|GO:0008641	ThiF family|Repeat in ubiquitin-activating (UBA) protein	Phypoly-transcript-01437	0.143	SM1
Phypoly-transcript-06801	1.09925e-62	1.78692	0.975	0.772	1.66206e-58	0	FGGY_HUMAN	GO:0005975|GO:0016773|GO:0005975|GO:0016773	FGGY family of carbohydrate kinases, C-terminal domain|FGGY family of carbohydrate kinases, N-terminal domain	Phypoly-transcript-06801	0.203	SM1
Phypoly-transcript-09653	3.70381e-57	1.77977	0.914	0.318	5.60016e-53	0	WRP73_HUMAN	GO:0005515	4874	Phypoly-transcript-09653	0.596	SM1
Phypoly-transcript-02472	4.05517e-59	1.77795	0.975	0.783	6.13142e-55	0	GBP1_CHLAE	GO:0003924|GO:0005525	1972	Phypoly-transcript-02472	0.192	SM1
Phypoly-transcript-01659	7.14301e-64	1.76962	0.985	0.801	1.08002e-59	0	Y2237_DICDI	GO:0005515|GO:0008270	4982	Phypoly-transcript-01659	0.184	SM1
Phypoly-transcript-27988	4.54614e-38	1.76841	0.914	0.462	6.87376e-34	0	noGene	GO:0005515	4454	Phypoly-transcript-27988	0.452	SM1
Phypoly-transcript-11820	5.17961e-50	1.76824	0.939	0.575	7.83156e-46	0	PUB11_ARATH	GO:0006886|GO:0016192|GO:0030117|GO:0005515	Adaptin N terminal region|Armadillo/plakoglobin ARM repeat profile.	Phypoly-transcript-11820	0.364	SM1
Phypoly-transcript-01264	3.36053e-64	1.76577	0.97	0.879	5.08112e-60	0	AGO2_RAT	GO:0005515|GO:0005515|GO:0005515|GO:0005515	Piwi domain|PAZ domain profile.|Piwi domain profile.|PAZ domain	Phypoly-transcript-01264	0.091	SM1
Phypoly-transcript-05212	5.43781e-56	1.76254	0.975	0.743	8.22197e-52	0	XRCC1_MOUSE	GO:0000012|GO:0003684|GO:0005634	4915	Phypoly-transcript-05212	0.232	SM1
Phypoly-transcript-13606	1.46258e-49	1.75733	0.929	0.633	2.21142e-45	0	SMBP2_MOUSE	GO:0003676|GO:0003676	R3H domain|R3H domain profile.	Phypoly-transcript-13606	0.296	SM1
Phypoly-transcript-06418	2.7213e-60	1.73708	0.98	0.838	4.11461e-56	0	PAKM_DROME	GO:0004672|GO:0005524|GO:0006468|GO:0004713|GO:0006468|GO:0003824|GO:0005524	Protein kinase domain profile.|Tyrosine protein kinases specific active-site signature.|RIO1 family	Phypoly-transcript-06418	0.142	SM1
Phypoly-transcript-02917	1.1285e-51	1.73619	0.964	0.777	1.7063e-47	0	PIF1_XENLA	GO:0000723|GO:0003678|GO:0006281	3092	Phypoly-transcript-02917	0.187	SM1
Phypoly-transcript-07306	1.62803e-45	1.73467	0.909	0.581	2.46158e-41	0	TNKS_DROME	GO:0003950|GO:0003950	Poly(ADP-ribose) polymerase catalytic domain|PARP catalytic domain profile.	Phypoly-transcript-07306	0.328	SM1
Phypoly-transcript-14689	5.88174e-49	1.72935	0.893	0.494	8.8932e-45	0	UHRF1_RAT	GO:0042393|GO:0042393	YDG domain profile.|SAD/SRA domain	Phypoly-transcript-14689	0.399	SM1
Phypoly-transcript-10893	3.88945e-52	1.72637	0.929	0.509	5.88086e-48	0	Y4757_DICDI	GO:0008270|GO:0008270|GO:0008270	Zn-finger in Ran binding protein and others|Zinc finger RanBP2 type profile.|Zinc finger RanBP2-type signature.	Phypoly-transcript-10893	0.42	SM1
Phypoly-transcript-01341	1.75667e-54	1.72452	0.964	0.855	2.65609e-50	0	noGene	GO:0003924|GO:0005525	1972	Phypoly-transcript-01341	0.109	SM1
Phypoly-transcript-15006	8.80567e-60	1.72345	0.919	0.286	1.33142e-55	0	NAA40_HUMAN	GO:0008080|GO:0008080	Acetyltransferase (GNAT) family|Gcn5-related N-acetyltransferase (GNAT) domain profile.	Phypoly-transcript-15006	0.633	SM1
Phypoly-transcript-03100	7.26593e-60	1.71004	0.975	0.882	1.09861e-55	0	YI7F_SCHPO	GO:0008289|GO:0008289|GO:0005096|GO:0005622|GO:0051056|GO:0005096|GO:0005622|GO:0051056	START domain|START domain profile.|GTPase-activator protein for Ras-like GTPase|Ras GTPase-activating proteins profile.	Phypoly-transcript-03100	0.093	SM1
Phypoly-transcript-00615	4.12166e-55	1.70345	0.954	0.63	6.23194e-51	0	MRP1_MACFA	GO:0005524|GO:0016887|GO:0005524|GO:0006810|GO:0016021|GO:0042626|GO:0055085|GO:0005524|GO:0006810|GO:0016021|GO:0042626|GO:0055085|GO:0005524|GO:0016887|GO:0005524|GO:0016887	ABC transporters family signature.|ABC transporter integral membrane type-1 fused domain profile.|ABC transporter transmembrane region|ATP-binding cassette, ABC transporter-type domain profile.|ABC transporter	Phypoly-transcript-00615	0.324	SM1
Phypoly-transcript-07349	4.79907e-54	1.70309	0.949	0.633	7.2562e-50	0	PMVK_BOVIN	GO:0000776|GO:0051382	708	Phypoly-transcript-07349	0.316	SM1
Phypoly-transcript-12643	3.36158e-56	1.70233	0.964	0.699	5.0827e-52	0	Y2239_MYCBO	GO:0003824|GO:0044237|GO:0050662	2657	Phypoly-transcript-12643	0.265	SM1
Phypoly-transcript-01866	1.26981e-49	1.6997	0.98	0.818	1.91995e-45	0	NU107_HUMAN	GO:0005643|GO:0006810	2766	Phypoly-transcript-01866	0.162	SM1
Phypoly-transcript-09169	6.4156e-58	1.69705	0.98	0.63	9.70039e-54	0	LBR_HUMAN	GO:0016020|GO:0016628|GO:0055114	Ergosterol biosynthesis ERG4/ERG24 family|Sterol reductase family signature 2.	Phypoly-transcript-09169	0.35	SM1
Phypoly-transcript-09857	6.23354e-54	1.69545	0.832	0.182	9.42512e-50	0	noGene	GO:0005515|GO:0005515	Bromodomain profile.|Bromodomain	Phypoly-transcript-09857	0.65	SM1
Phypoly-transcript-01916	2.48166e-56	1.69289	0.919	0.338	3.75227e-52	0	EXO1_ORYSJ	GO:0004518|GO:0006281|GO:0004518	XPG N-terminal domain|XPG I-region	Phypoly-transcript-01916	0.581	SM1
Phypoly-transcript-04803	1.29975e-63	1.68594	0.985	0.867	1.96523e-59	0	Y9955_DICDI	GO:0005524|GO:0016887|GO:0005524|GO:0016887|GO:0005524|GO:0006810|GO:0016021|GO:0042626|GO:0055085|GO:0005524|GO:0016887|GO:0005524|GO:0006810|GO:0016021|GO:0042626|GO:0055085	ABC transporter|ABC transporters family signature.|ABC transporter transmembrane region|ATP-binding cassette, ABC transporter-type domain profile.|ABC transporter integral membrane type-1 fused domain profile.	Phypoly-transcript-04803	0.118	SM1
Phypoly-transcript-05000	7.51284e-63	1.682	0.985	0.905	1.13594e-58	0	noGene	GO:0005515	4005	Phypoly-transcript-05000	0.08	SM1
Phypoly-transcript-11699	2.29907e-54	1.67527	0.954	0.587	3.4762e-50	0	D39U1_MOUSE	GO:0003824|GO:0044237|GO:0050662	2657	Phypoly-transcript-11699	0.367	SM1
Phypoly-transcript-14822	7.67123e-53	1.66876	0.964	0.662	1.15989e-48	0	LVR_LEIAQ	GO:0008152|GO:0016491|GO:0016491	short chain dehydrogenase|Short-chain dehydrogenases/reductases family signature.	Phypoly-transcript-14822	0.302	SM1
Phypoly-transcript-11472	8.32848e-55	1.66323	0.97	0.662	1.25927e-50	0	noGene	GO:0016021	4259	Phypoly-transcript-11472	0.308	SM1
Phypoly-transcript-13520	4.82576e-37	1.65742	0.701	0.22	7.29655e-33	0	RAF2A_ARATH	GO:0005525|GO:0007264	3588	Phypoly-transcript-13520	0.481	SM1
Phypoly-transcript-07775	1.73477e-49	1.65467	0.914	0.327	2.62297e-45	0	noGene	GO:0008270	4979	Phypoly-transcript-07775	0.587	SM1
Phypoly-transcript-16612	7.19294e-48	1.64708	0.944	0.61	1.08757e-43	0	NUDT2_ARATH	GO:0016787|GO:0016787|GO:0016787	NUDIX domain|Nudix box signature.|Nudix hydrolase domain profile.	Phypoly-transcript-16612	0.334	SM1
Phypoly-transcript-16979	5.62501e-50	1.64619	0.924	0.618	8.50502e-46	0	noGene	GO:0000723|GO:0000784|GO:0003677	4355	Phypoly-transcript-16979	0.306	SM1
Phypoly-transcript-05249	1.39911e-54	1.64551	0.954	0.405	2.11545e-50	0	noGene	GO:0004672|GO:0005524|GO:0006468|GO:0004672|GO:0005524|GO:0006468	Protein kinase domain profile.|Protein kinase domain	Phypoly-transcript-05249	0.549	SM1
Phypoly-transcript-11518	4.31611e-49	1.64344	0.959	0.725	6.52596e-45	0	noGene	GO:0003723|GO:0004525|GO:0006396	3693	Phypoly-transcript-11518	0.234	SM1
Phypoly-transcript-20628	2.66201e-59	1.64305	0.99	0.731	4.02496e-55	0	UBE2C_DICDI	GO:0016881|GO:0016881	Ubiquitin-conjugating enzyme|Ubiquitin-conjugating enzymes family profile.	Phypoly-transcript-20628	0.259	SM1
Phypoly-transcript-10954	1.77206e-41	1.64258	0.929	0.624	2.67936e-37	0	noGene	GO:0005515	1532	Phypoly-transcript-10954	0.305	SM1
Phypoly-transcript-09669	2.5668e-57	1.64206	0.99	0.931	3.881e-53	0	noGene	GO:0005921	2878	Phypoly-transcript-09669	0.059	SM1
Phypoly-transcript-09408	1.13466e-47	1.64199	0.959	0.702	1.7156e-43	0	UB2R2_RABIT	GO:0016881|GO:0016881	Ubiquitin-conjugating enzyme|Ubiquitin-conjugating enzymes family profile.	Phypoly-transcript-09408	0.257	SM1
Phypoly-transcript-00214	1.64789e-60	1.64082	1	0.986	2.49161e-56	0	TTC27_DICDI	GO:0003676|GO:0008270	4961	Phypoly-transcript-00214	0.014	SM1
Phypoly-transcript-10717	6.7509e-52	1.63573	0.97	0.772	1.02074e-47	0	SXL_DROME	GO:0003676|GO:0003676	Eukaryotic RNA Recognition Motif (RRM) profile.|RNA recognition motif. (a.k.a. RRM, RBD, or RNP domain)	Phypoly-transcript-10717	0.198	SM1
Phypoly-transcript-24358	1.51688e-53	1.63433	0.97	0.74	2.29352e-49	0	T2AG_ORYSJ	GO:0005672|GO:0006367|GO:0005672|GO:0006367	Transcription initiation factor IIA, gamma subunit, helical domain|Transcription initiation factor IIA, gamma subunit	Phypoly-transcript-24358	0.23	SM1
Phypoly-transcript-14380	7.34765e-45	1.62648	0.929	0.581	1.11096e-40	0	noGene	GO:0004553|GO:0005975	744	Phypoly-transcript-14380	0.348	SM1
Phypoly-transcript-02157	1.88351e-58	1.62313	0.878	0.22	2.84786e-54	0	RAD5_NEUCR	GO:0003676|GO:0004386|GO:0005524|GO:0003677|GO:0005524	Superfamilies 1 and 2 helicase C-terminal domain profile.|SNF2 family N-terminal domain	Phypoly-transcript-02157	0.658	SM1
Phypoly-transcript-04979	4.14825e-55	1.62064	0.914	0.387	6.27215e-51	0	MUS81_DICDI	GO:0003677|GO:0004518	1449	Phypoly-transcript-04979	0.527	SM1
Phypoly-transcript-12348	2.6158e-65	1.61337	0.985	0.801	3.95509e-61	0	SAP1_ARATH	GO:0008270|GO:0003677|GO:0008270|GO:0003677|GO:0008270|GO:0008270	Zinc finger AN1-type profile.|Zinc finger A20-type profile.|A20-like zinc finger|AN1-like Zinc finger	Phypoly-transcript-12348	0.184	SM1
Phypoly-transcript-17127	1.75197e-48	1.61298	0.975	0.806	2.64898e-44	0	noGene	GO:0005525	57	Phypoly-transcript-17127	0.169	SM1
Phypoly-transcript-07370	8.74821e-54	1.61145	0.964	0.731	1.32273e-49	0	DOT1_CANAL	GO:0018024|GO:0018024	Histone-lysine N-methyltransferase DOT1 (EC 2.1.1.43) domain profile.|Histone methylation protein DOT1	Phypoly-transcript-07370	0.233	SM1
Phypoly-transcript-13793	6.64588e-44	1.61116	0.919	0.494	1.00486e-39	0	U80B1_ARATH	GO:0008152|GO:0016758	4704	Phypoly-transcript-13793	0.425	SM1
Phypoly-transcript-05787	1.08368e-47	1.60581	0.964	0.642	1.63852e-43	0	UBC32_ARATH	GO:0016881|GO:0016881	Ubiquitin-conjugating enzymes family profile.|Ubiquitin-conjugating enzyme	Phypoly-transcript-05787	0.322	SM1
Phypoly-transcript-02909	4.01486e-48	1.60015	0.944	0.682	6.07047e-44	0	M3K7_MOUSE	GO:0005524|GO:0046872|GO:0003676|GO:0004519|GO:0004672|GO:0005524|GO:0006468|GO:0004672|GO:0005524|GO:0006468|GO:0004674|GO:0006468	Protein kinases ATP-binding region signature.|Zinc finger C3H1-type profile.|HNH endonuclease|Protein kinase domain|Protein kinase domain profile.|Serine/Threonine protein kinases active-site signature.	Phypoly-transcript-02909	0.262	SM1
Phypoly-transcript-03809	2.45107e-52	1.59573	0.98	0.798	3.70601e-48	0	VWA2_HUMAN	GO:0005525|GO:0007049	4062	Phypoly-transcript-03809	0.182	SM1
Phypoly-transcript-16586	2.32101e-38	1.59567	0.665	0.145	3.50936e-34	0	DGK_DICDI	GO:0005524|GO:0006139|GO:0016773	1044	Phypoly-transcript-16586	0.52	SM1
Phypoly-transcript-11620	1.76348e-52	1.59369	0.949	0.627	2.66638e-48	0	RHBL4_RAT	GO:0004252|GO:0016021	3683	Phypoly-transcript-11620	0.322	SM1
Phypoly-transcript-18477	6.73574e-35	1.59131	0.893	0.636	1.01844e-30	0	PHLP3_DICDI	GO:0045454	4408	Phypoly-transcript-18477	0.257	SM1
Phypoly-transcript-05505	6.24598e-47	1.58936	0.934	0.451	9.44392e-43	0	PSR2_YEAST	GO:0005515|GO:0005515	FCP1 homology domain profile.|NLI interacting factor-like phosphatase	Phypoly-transcript-05505	0.483	SM1
Phypoly-transcript-01515	9.92791e-54	1.58517	0.97	0.751	1.5011e-49	0	CPNE1_HUMAN	GO:0003723|GO:0003743|GO:0005737|GO:0006413	1479	Phypoly-transcript-01515	0.219	SM1
Phypoly-transcript-01632	8.66513e-58	1.58446	0.99	0.908	1.31017e-53	0	DNLI_HAEIN	GO:0003910|GO:0005524|GO:0006281|GO:0006310	383	Phypoly-transcript-01632	0.082	SM1
Phypoly-transcript-07435	5.46008e-46	1.58088	0.919	0.662	8.25564e-42	0	noGene	GO:0003676	1497	Phypoly-transcript-07435	0.257	SM1
Phypoly-transcript-15262	1.7252e-49	1.58082	0.97	0.668	2.6085e-45	0	RPIA_PIG	GO:0004751|GO:0009052	3706	Phypoly-transcript-15262	0.302	SM1
Phypoly-transcript-09402	2.46143e-44	1.58056	0.787	0.208	3.72169e-40	0	CHI3_CANAL	GO:0004553|GO:0005975|GO:0016998	Chitinases family 18 active site.|LysM domain	Phypoly-transcript-09402	0.579	SM1
Phypoly-transcript-20893	1.73184e-60	1.57847	0.98	0.54	2.61854e-56	0	noGene	GO:0007165|GO:0007165	Rho GTPase-activating proteins domain profile.|RhoGAP domain	Phypoly-transcript-20893	0.44	SM1
Phypoly-transcript-13313	2.82434e-44	1.577	0.863	0.347	4.2704e-40	0	ABCF4_DICDI	GO:0005524|GO:0016887|GO:0005524|GO:0016887|GO:0005524|GO:0016887	ABC transporter|ATP-binding cassette, ABC transporter-type domain profile.|ABC transporters family signature.	Phypoly-transcript-13313	0.516	SM1
Phypoly-transcript-04765	7.8086e-54	1.57247	0.98	0.786	1.18066e-49	0	DMPM_STRAD	GO:0008171	2805	Phypoly-transcript-04765	0.194	SM1
Phypoly-transcript-08526	1.53774e-63	1.57244	0.985	0.821	2.32506e-59	0	MSL2_DROME	GO:0046872	4959	Phypoly-transcript-08526	0.164	SM1
Phypoly-transcript-15797	1.06745e-52	1.57141	0.964	0.694	1.61398e-48	0	noGene	GO:0005515	1532	Phypoly-transcript-15797	0.27	SM1
Phypoly-transcript-19588	6.71823e-43	1.57087	0.924	0.555	1.0158e-38	0	CAP_DICDI	GO:0003779|GO:0007010	160	Phypoly-transcript-19588	0.369	SM1
Phypoly-transcript-29354	1.14255e-38	1.56945	0.731	0.211	1.72754e-34	0	noGene	GO:0004864|GO:0007165	3435	Phypoly-transcript-29354	0.52	SM1
Phypoly-transcript-21452	3.42915e-46	1.56589	0.964	0.769	5.18487e-42	0	ALR_RAT	GO:0016972|GO:0055114|GO:0016972|GO:0055114	Erv1 / Alr family|ERV/ALR sulfhydryl oxidase domain profile.	Phypoly-transcript-21452	0.195	SM1
Phypoly-transcript-13148	6.32076e-41	1.56443	0.868	0.422	9.55699e-37	0	TNKS2_MOUSE	GO:0005515|GO:0005515	Ankyrin repeat profile.|Ankyrin repeat	Phypoly-transcript-13148	0.446	SM1
Phypoly-transcript-05189	2.83379e-46	1.5635	0.964	0.61	4.28469e-42	0	TERZ_SERMA	GO:0005515|GO:0006950|GO:0005515	F-box domain profile.|TerD domain|F-box domain	Phypoly-transcript-05189	0.354	SM1
Phypoly-transcript-08319	3.18114e-52	1.56329	0.975	0.809	4.80989e-48	0	H17B6_BOVIN	GO:0016491|GO:0008152|GO:0016491	Short-chain dehydrogenases/reductases family signature.|short chain dehydrogenase	Phypoly-transcript-08319	0.166	SM1
Phypoly-transcript-03990	1.23998e-51	1.56229	0.97	0.737	1.87485e-47	0	GACY_DICDI	GO:0004672|GO:0005524|GO:0006468|GO:0007165|GO:0007165|GO:0004672|GO:0005524|GO:0006468	Protein kinase domain|RhoGAP domain|Rho GTPase-activating proteins domain profile.|Protein kinase domain profile.	Phypoly-transcript-03990	0.233	SM1
Phypoly-transcript-14285	5.6845e-55	1.55693	0.995	0.974	8.59496e-51	0	noGene	GO:0005089|GO:0035023|GO:0005089|GO:0035023	Dbl homology (DH) domain profile.|RhoGEF domain	Phypoly-transcript-14285	0.021	SM1
Phypoly-transcript-12853	2.25643e-38	1.55643	0.827	0.384	3.41172e-34	0	FMT_RAT	GO:0009058|GO:0016742|GO:0009058|GO:0016742	Formyl transferase|Formyl transferase, C-terminal domain	Phypoly-transcript-12853	0.443	SM1
Phypoly-transcript-00650	2.64735e-53	1.54904	0.964	0.867	4.0028e-49	0	NPHP3_DANRE	GO:0005515|GO:0005515|GO:0005515	Fibronectin type-III domain profile.|Fibronectin type III domain|TPR repeat region circular profile.	Phypoly-transcript-00650	0.097	SM1
Phypoly-transcript-14682	2.13098e-47	1.54762	0.944	0.659	3.22205e-43	0	noGene	GO:0005515|GO:0005515	F-box domain profile.|F-box domain	Phypoly-transcript-14682	0.285	SM1
Phypoly-transcript-04503	4.36058e-45	1.54494	0.934	0.572	6.5932e-41	0	KIF17_MOUSE	GO:0003777|GO:0005524|GO:0007018|GO:0003777|GO:0005524|GO:0007018|GO:0008017|GO:0003777|GO:0005524|GO:0007018|GO:0008017	Kinesin motor domain signature.|Kinesin motor domain profile.|Kinesin motor domain	Phypoly-transcript-04503	0.362	SM1
Phypoly-transcript-07814	4.20706e-48	1.54484	0.949	0.757	6.36108e-44	0	EGCSE_CYANO	GO:0004553|GO:0005975|GO:0004553|GO:0005975	Glycosyl hydrolases family 5 signature.|Cellulase (glycosyl hydrolase family 5)	Phypoly-transcript-07814	0.192	SM1
Phypoly-transcript-06795	7.33109e-48	1.54451	0.939	0.575	1.10846e-43	0	UBR7_DICDI	GO:0004842|GO:0008270|GO:0004842|GO:0008270	Putative zinc finger in N-recognin (UBR box)|Zinc finger UBR-type profile.	Phypoly-transcript-06795	0.364	SM1
Phypoly-transcript-07335	6.92063e-41	1.54366	0.863	0.402	1.0464e-36	0	RFT1_DICDI	GO:0005319|GO:0006869|GO:0016021	3672	Phypoly-transcript-07335	0.461	SM1
Phypoly-transcript-13715	2.61897e-50	1.54216	0.959	0.639	3.95989e-46	0	YHZ7_SCHPO	GO:0004553|GO:0005975	1864	Phypoly-transcript-13715	0.32	SM1
Phypoly-transcript-13938	3.51207e-42	1.53775	0.934	0.581	5.31025e-38	0	Y2030_MYCTU	GO:0009116	3066	Phypoly-transcript-13938	0.353	SM1
Phypoly-transcript-00195	1.02614e-63	1.53669	0.995	0.954	1.55153e-59	0	KIF4_DICDI	GO:0003777|GO:0005524|GO:0007018|GO:0008017|GO:0003777|GO:0005524|GO:0007018|GO:0003777|GO:0005524|GO:0007018|GO:0008017	Kinesin motor domain profile.|Kinesin motor domain signature.|Kinesin motor domain	Phypoly-transcript-00195	0.041	SM1
Phypoly-transcript-01548	3.47703e-51	1.53323	0.975	0.743	5.25727e-47	0	MANA_DICDI	GO:0004553|GO:0008270|GO:0006013|GO:0015923|GO:0004559|GO:0005975|GO:0005215|GO:0005737|GO:0006810|GO:0016021	Alpha mannosidase, middle domain|Glycosyl hydrolases family 38 C-terminal domain|Glycosyl hydrolases family 38 N-terminal domain|Cation-independent mannose-6-phosphate receptor repeat	Phypoly-transcript-01548	0.232	SM1
Phypoly-transcript-03870	3.59273e-48	1.53297	0.893	0.39	5.4322e-44	0	TBC31_HUMAN	GO:0005515|GO:0005097|GO:0032313|GO:0005097|GO:0032313	WD domain, G-beta repeat|TBC/rab GAP domain profile.|Rab-GTPase-TBC domain	Phypoly-transcript-03870	0.503	SM1
Phypoly-transcript-17456	2.83675e-36	1.52908	0.904	0.564	4.28917e-32	0	NU301_DROME	GO:0005515|GO:0005515	PHD-finger|Zinc finger PHD-type profile.	Phypoly-transcript-17456	0.34	SM1
Phypoly-transcript-16695	1.10395e-57	1.52812	0.98	0.829	1.66917e-53	0	RSU1_HUMAN	GO:0005515|GO:0005515	Leucine-rich repeat profile.|Leucine Rich Repeat	Phypoly-transcript-16695	0.151	SM1
Phypoly-transcript-02602	7.57184e-53	1.52384	0.98	0.812	1.14486e-48	0	LIN9_MOUSE	GO:0006351|GO:0007049|GO:0017053	1097	Phypoly-transcript-02602	0.168	SM1
Phypoly-transcript-06412	2.58007e-60	1.52367	0.975	0.777	3.90106e-56	0	HETE1_PODAS	GO:0005515|GO:0005515|GO:0005515|GO:0005515	Trp-Asp (WD) repeats profile.|Trp-Asp (WD) repeats circular profile.|WD domain, G-beta repeat|F-box domain profile.	Phypoly-transcript-06412	0.198	SM1
Phypoly-transcript-05187	5.99579e-48	1.51608	0.939	0.581	9.06564e-44	0	GEFJ_DICDI	GO:0005515|GO:0005515|GO:0005085|GO:0005622|GO:0007264|GO:0005085|GO:0005622|GO:0007264	F-box domain profile.|F-box domain|Ras guanine-nucleotide exchange factors catalytic domain profile.|RasGEF domain	Phypoly-transcript-05187	0.358	SM1
Phypoly-transcript-03480	9.91699e-56	1.51477	0.985	0.812	1.49945e-51	0	CALM_SCHPO	GO:0005509|GO:0006952|GO:0016021|GO:0005509	EF-hand calcium-binding domain profile.|Mlo family|EF-hand domain pair	Phypoly-transcript-03480	0.173	SM1
Phypoly-transcript-08525	4.42396e-51	1.5048	0.98	0.905	6.68903e-47	0	094L_FRG3G	GO:0000012|GO:0003684|GO:0005634	4915	Phypoly-transcript-08525	0.075	SM1
Phypoly-transcript-15454	3.04717e-42	1.50442	0.929	0.564	4.60731e-38	0	TNKS_DROME	GO:0005515	295	Phypoly-transcript-15454	0.365	SM1
Phypoly-transcript-05587	7.95528e-51	1.49899	0.98	0.777	1.20284e-46	0	NWD1_MOUSE	GO:0005515|GO:0005515|GO:0005515|GO:0005515|GO:0005515	Trp-Asp (WD) repeats circular profile.|C2 domain|C2 domain profile.|WD domain, G-beta repeat|Trp-Asp (WD) repeats profile.	Phypoly-transcript-05587	0.203	SM1
Phypoly-transcript-00722	3.98613e-57	1.49759	0.975	0.85	6.02703e-53	0	SM3L2_ARATH	GO:0003676|GO:0004386|GO:0005524|GO:0046872|GO:0005515|GO:0008270|GO:0003677|GO:0005524|GO:0003676|GO:0004386|GO:0005524	Superfamilies 1 and 2 helicase C-terminal domain profile.|Zinc finger, C3HC4 type (RING finger)|Zinc finger RING-type profile.|SNF2 family N-terminal domain|Helicase conserved C-terminal domain	Phypoly-transcript-00722	0.125	SM1
Phypoly-transcript-06271	4.68346e-40	1.49473	0.807	0.315	7.08139e-36	0	HEMN_AQUAE	GO:0003824|GO:0051536	3570	Phypoly-transcript-06271	0.492	SM1
Phypoly-transcript-15849	1.72824e-45	1.49087	0.959	0.569	2.61311e-41	0	H4_PHYPO	GO:0000786|GO:0003677|GO:0005634|GO:0006334|GO:0003677	Histone H4 signature.|Core histone H2A/H2B/H3/H4	Phypoly-transcript-15849	0.39	SM1
Phypoly-transcript-10444	3.45083e-49	1.49044	0.97	0.757	5.21765e-45	0	SDH_GLUOY	GO:0016614|GO:0055114|GO:0016614|GO:0050660|GO:0055114|GO:0016614|GO:0050660|GO:0055114|GO:0016614|GO:0050660|GO:0055114	GMC oxidoreductase|GMC oxidoreductases signature 2.|GMC oxidoreductases signature 1.	Phypoly-transcript-10444	0.213	SM1
Phypoly-transcript-16821	2.10126e-58	1.48694	0.975	0.737	3.1771e-54	0	EBP_DICDI	GO:0005783|GO:0016021|GO:0016125|GO:0047750	1413	Phypoly-transcript-16821	0.238	SM1
Phypoly-transcript-14642	1.56403e-44	1.48691	0.939	0.587	2.36482e-40	0	AMID_ECOLI	GO:0008745|GO:0009253	2629	Phypoly-transcript-14642	0.352	SM1
Phypoly-transcript-07797	2.65908e-44	1.48509	0.904	0.39	4.02053e-40	0	PARP2_ARATH	GO:0003950	3137	Phypoly-transcript-07797	0.514	SM1
Phypoly-transcript-22531	2.98105e-42	1.48255	0.929	0.636	4.50735e-38	0	noGene	GO:0005515|GO:0005515	C2 domain profile.|C2 domain	Phypoly-transcript-22531	0.293	SM1
Phypoly-transcript-16453	3.02571e-35	1.48055	0.853	0.448	4.57488e-31	0	DUS19_HUMAN	GO:0004725|GO:0016311|GO:0016791|GO:0006470|GO:0008138|GO:0006470|GO:0008138|GO:0016311|GO:0016791	Tyrosine specific protein phosphatases active site.|Dual specificity phosphatase, catalytic domain|Dual specificity protein phosphatase family profile.|Tyrosine specific protein phosphatases family profile.	Phypoly-transcript-16453	0.405	SM1
Phypoly-transcript-07228	3.25454e-38	1.47814	0.858	0.497	4.92087e-34	0	HEXA1_DICDI	GO:0004553|GO:0005975	1840	Phypoly-transcript-07228	0.361	SM1
Phypoly-transcript-04805	9.12906e-48	1.47769	0.939	0.578	1.38031e-43	0	TNKS2_HUMAN	GO:0003950|GO:0003950	Poly(ADP-ribose) polymerase catalytic domain|PARP catalytic domain profile.	Phypoly-transcript-04805	0.361	SM1
Phypoly-transcript-15968	7.8818e-45	1.47554	0.909	0.5	1.19173e-40	0	PNCA_ECOLI	GO:0003824|GO:0008152	2238	Phypoly-transcript-15968	0.409	SM1
Phypoly-transcript-13714	5.32714e-50	1.47481	0.959	0.679	8.05464e-46	0	PRDX1_GECJA	GO:0051920|GO:0055114|GO:0016209|GO:0016491|GO:0055114	C-terminal domain of 1-Cys peroxiredoxin|AhpC/TSA family	Phypoly-transcript-13714	0.28	SM1
Phypoly-transcript-13210	1.136e-49	1.47348	0.975	0.763	1.71764e-45	0	noGene	GO:0005515	1532	Phypoly-transcript-13210	0.212	SM1
Phypoly-transcript-05619	3.47326e-28	1.47239	0.904	0.616	5.25156e-24	0	CP4FC_HUMAN	GO:0016705|GO:0055114|GO:0005506|GO:0016705|GO:0020037|GO:0055114	Cytochrome P450 cysteine heme-iron ligand signature.|Cytochrome P450	Phypoly-transcript-05619	0.288	SM1
Phypoly-transcript-11505	9.50251e-43	1.46961	0.964	0.659	1.43678e-38	0	THA2_ARATH	GO:0006520|GO:0016829	489	Phypoly-transcript-11505	0.305	SM1
Phypoly-transcript-10011	3.83493e-40	1.46708	0.924	0.65	5.79841e-36	0	AK1_DICDI	GO:0008060|GO:0008270|GO:0032312|GO:0008060|GO:0008270|GO:0032312	Putative GTPase activating protein for Arf|ARF GTPase-activating proteins domain profile.	Phypoly-transcript-10011	0.274	SM1
Phypoly-transcript-24628	4.3904e-47	1.46415	0.97	0.694	6.63828e-43	0	CYB5_RHIST	GO:0020037|GO:0020037	Cytochrome b5 family, heme-binding domain profile.|Cytochrome b5-like Heme/Steroid binding domain	Phypoly-transcript-24628	0.276	SM1
Phypoly-transcript-06070	3.95296e-55	1.46295	0.975	0.855	5.97688e-51	0	AK3_ARATH	GO:0004072|GO:0008652	371	Phypoly-transcript-06070	0.12	SM1
Phypoly-transcript-04454	3.73088e-55	1.46273	0.98	0.844	5.64109e-51	0	RNF26_MOUSE	GO:0005515|GO:0008270	4982	Phypoly-transcript-04454	0.136	SM1
Phypoly-transcript-03617	9.00808e-54	1.46243	0.97	0.751	1.36202e-49	0	DNLI_HAEIN	GO:0003910|GO:0005524|GO:0006281|GO:0006310|GO:0003909|GO:0051103	ATP dependent DNA ligase domain|ATP-dependent DNA ligase signature 2.	Phypoly-transcript-03617	0.219	SM1
Phypoly-transcript-02203	2.98837e-50	1.46239	0.97	0.87	4.51841e-46	0	ALKB_SALTY	GO:0005515|GO:0005515	CUE domain profile.|CUE domain	Phypoly-transcript-02203	0.1	SM1
Phypoly-transcript-09479	7.93856e-48	1.4615	0.98	0.728	1.20031e-43	0	APMAP_RAT	GO:0009058|GO:0016844	4266	Phypoly-transcript-09479	0.252	SM1
Phypoly-transcript-02737	2.75943e-56	1.45853	0.975	0.789	4.17226e-52	0	HIS3_ARATH	GO:0003924|GO:0005525	1342	Phypoly-transcript-02737	0.186	SM1
Phypoly-transcript-08675	9.86247e-52	1.45782	0.964	0.783	1.4912e-47	0	PTEN_XENLA	GO:0006470|GO:0008138|GO:0004725|GO:0016311|GO:0016791|GO:0005515|GO:0005515|GO:0005515	Dual specificity phosphatase, catalytic domain|Tyrosine specific protein phosphatases active site.|Phosphatase tensin-type domain profile.|C2 domain of PTEN tumour-suppressor protein|C2 tensin-type domain profile.	Phypoly-transcript-08675	0.181	SM1
Phypoly-transcript-06402	1.35189e-52	1.45373	0.98	0.818	2.04406e-48	0	AMY_BACME	GO:0003824|GO:0005975|GO:0043169	224	Phypoly-transcript-06402	0.162	SM1
Phypoly-transcript-02031	1.18319e-49	1.45342	0.97	0.861	1.78899e-45	0	RABD1_ARATH	GO:0005525|GO:0007264	3588	Phypoly-transcript-02031	0.109	SM1
Phypoly-transcript-13423	4.63597e-51	1.45078	0.97	0.827	7.00959e-47	0	YDAA_SCHPO	GO:0020037|GO:0020037	Cytochrome b5-like Heme/Steroid binding domain|Cytochrome b5 family, heme-binding domain profile.	Phypoly-transcript-13423	0.143	SM1
Phypoly-transcript-01058	1.45015e-55	1.44945	0.959	0.491	2.19263e-51	0	HELQ_HUMAN	GO:0003676|GO:0004386|GO:0005524|GO:0003676|GO:0004386|GO:0005524|GO:0003676|GO:0005524|GO:0008026	Superfamilies 1 and 2 helicase C-terminal domain profile.|Helicase conserved C-terminal domain|DEAD/DEAH box helicase	Phypoly-transcript-01058	0.468	SM1
Phypoly-transcript-02780	9.04571e-40	1.44509	0.939	0.792	1.36771e-35	0	KCTD9_HUMAN	GO:0051260	553	Phypoly-transcript-02780	0.147	SM1
Phypoly-transcript-00100	7.35411e-58	1.445	0.98	0.402	1.11194e-53	0	BIMB_EMENI	GO:0005634|GO:0006508|GO:0008233	2932	Phypoly-transcript-00100	0.578	SM1
Phypoly-transcript-07220	8.71479e-52	1.44484	0.975	0.818	1.31768e-47	0	NHP6_SCHPO	GO:0005515	4006	Phypoly-transcript-07220	0.157	SM1
Phypoly-transcript-12879	8.1041e-42	1.44452	0.929	0.566	1.22534e-37	0	SYHC_TAKRU	GO:0004812|GO:0006418	258	Phypoly-transcript-12879	0.363	SM1
Phypoly-transcript-18931	3.59892e-55	1.44436	0.995	0.85	5.44157e-51	0	H2AV1_ORYSJ	GO:0000786|GO:0003677|GO:0005634|GO:0006334|GO:0003677	Histone H2A signature.|Core histone H2A/H2B/H3/H4	Phypoly-transcript-18931	0.145	SM1
Phypoly-transcript-29018	3.7142e-33	1.44358	0.543	0.081	5.61587e-29	0	CWC27_MACFA	GO:0003755|GO:0006457	932	Phypoly-transcript-29018	0.462	SM1
Phypoly-transcript-00760	1.08898e-47	1.44328	0.97	0.754	1.64654e-43	0	DNLI3_HUMAN	GO:0003677|GO:0003910|GO:0006281|GO:0006310|GO:0003910|GO:0005524|GO:0006281|GO:0006310|GO:0003910|GO:0006281|GO:0006310|GO:0003909|GO:0051103|GO:0003910|GO:0005524|GO:0006281|GO:0006310|GO:0003909|GO:0051103	DNA ligase N terminus|ATP dependent DNA ligase domain|ATP dependent DNA ligase C terminal region|ATP-dependent DNA ligase AMP-binding site.|ATP-dependent DNA ligase family profile.|ATP-dependent DNA ligase signature 2.	Phypoly-transcript-00760	0.216	SM1
Phypoly-transcript-05374	2.31543e-49	1.44196	0.934	0.439	3.50093e-45	0	noGene	GO:0005515|GO:0005515	Forkhead-associated (FHA) domain profile.|FHA domain	Phypoly-transcript-05374	0.495	SM1
Phypoly-transcript-01310	5.92107e-51	1.44036	0.98	0.757	8.95265e-47	0	MSH6_SCHPO	GO:0005524|GO:0006298|GO:0030983|GO:0005524|GO:0006298|GO:0030983|GO:0005524|GO:0006298|GO:0030983|GO:0005524|GO:0006298|GO:0030983|GO:0005524|GO:0006298|GO:0030983|GO:0005524|GO:0006298|GO:0030983	MutS domain II|DNA mismatch repair proteins mutS family signature.|MutS domain III|MutS domain V|MutS domain I|MutS family domain IV	Phypoly-transcript-01310	0.223	SM1
Phypoly-transcript-09411	1.27531e-45	1.44024	0.909	0.532	1.92827e-41	0	FCY1_YEAST	GO:0008270|GO:0016787	945	Phypoly-transcript-09411	0.377	SM1
Phypoly-transcript-00771	4.18179e-49	1.43949	0.985	0.806	6.32287e-45	0	MSH6_DICDI	GO:0005524|GO:0006298|GO:0030983|GO:0005524|GO:0006298|GO:0030983|GO:0005524|GO:0006298|GO:0030983|GO:0005524|GO:0006298|GO:0030983	MutS domain II|MutS family domain IV|MutS domain III|MutS domain I	Phypoly-transcript-00771	0.179	SM1
Phypoly-transcript-00713	2.01414e-50	1.43331	0.959	0.728	3.04538e-46	0	KLDC3_HUMAN	GO:0005515	2261	Phypoly-transcript-00713	0.231	SM1
Phypoly-transcript-02934	2.31646e-63	1.42944	0.98	0.358	3.50248e-59	0	RAD5_SCHPO	GO:0003677|GO:0005524|GO:0003676|GO:0004386|GO:0005524|GO:0003676|GO:0004386|GO:0005524	SNF2 family N-terminal domain|Superfamilies 1 and 2 helicase C-terminal domain profile.|Helicase conserved C-terminal domain	Phypoly-transcript-02934	0.622	SM1
Phypoly-transcript-13332	3.26322e-50	1.42941	0.97	0.775	4.93398e-46	0	Y4MH_RHISN	GO:0003824|GO:0008152	252	Phypoly-transcript-13332	0.195	SM1
Phypoly-transcript-09061	8.2567e-40	1.42861	0.954	0.723	1.24841e-35	0	S35B3_PONAB	GO:0055085	4659	Phypoly-transcript-09061	0.231	SM1
Phypoly-transcript-13074	1.69359e-51	1.42591	0.98	0.829	2.5607e-47	0	GLRX3_XENTR	GO:0009055|GO:0015035|GO:0045454|GO:0009055|GO:0015035|GO:0045454|GO:0045454	Glutaredoxin domain profile.|Glutaredoxin|Thioredoxin	Phypoly-transcript-13074	0.151	SM1
Phypoly-transcript-15134	0.00976172	1.42491	0.305	0.205	1	0	RON_HUMAN	GO:0005515	2223	Phypoly-transcript-15134	0.1	SM1
Phypoly-transcript-04425	6.65986e-42	1.42223	0.944	0.705	1.00697e-37	0	BRCA1_RAT	GO:0005515|GO:0008270	4982	Phypoly-transcript-04425	0.239	SM1
Phypoly-transcript-20418	9.22544e-32	1.42058	0.975	0.76	1.39489e-27	0	H2B_COCIM	GO:0000786|GO:0003677|GO:0005634|GO:0006334|GO:0003677	Histone H2B signature.|Core histone H2A/H2B/H3/H4	Phypoly-transcript-20418	0.215	SM1
Phypoly-transcript-12198	1.3132e-47	1.41887	0.97	0.812	1.98556e-43	0	DENR_XENTR	GO:0003743|GO:0006413|GO:0003743|GO:0006413	Translation initiation factor SUI1 family profile.|Translation initiation factor SUI1	Phypoly-transcript-12198	0.158	SM1
Phypoly-transcript-00574	4.77929e-53	1.4134	0.98	0.59	7.22628e-49	0	GCP6_HUMAN	GO:0000226|GO:0000922|GO:0005815	4195	Phypoly-transcript-00574	0.39	SM1
Phypoly-transcript-17557	2.36533e-48	1.41231	0.98	0.783	3.57638e-44	0	MSRA_METTH	GO:0008113|GO:0055114	2957	Phypoly-transcript-17557	0.197	SM1
Phypoly-transcript-07730	9.05443e-37	1.41172	0.878	0.491	1.36903e-32	0	MEPCE_DANRE	GO:0008168|GO:0008168	Bin3-type S-adenosyl-L-methionine (SAM) domain profile.|Bicoid-interacting protein 3 (Bin3)	Phypoly-transcript-07730	0.387	SM1
Phypoly-transcript-12627	1.95819e-38	1.41142	0.914	0.561	2.96079e-34	0	noGene	GO:0000786|GO:0003677|GO:0005634|GO:0006334|GO:0000786|GO:0003677|GO:0005634|GO:0006334	Linker histone H1/H5 globular (H15) domain profile.|linker histone H1 and H5 family	Phypoly-transcript-12627	0.353	SM1
Phypoly-transcript-13632	1.63044e-30	1.40715	0.838	0.448	2.46522e-26	0	CENPA_DANRE	GO:0000786|GO:0003677|GO:0006334|GO:0003677	Histone H3 signature 2.|Core histone H2A/H2B/H3/H4	Phypoly-transcript-13632	0.39	SM1
Phypoly-transcript-09075	2.51485e-55	1.40609	0.97	0.772	3.80245e-51	0	noGene	GO:0003676	4012	Phypoly-transcript-09075	0.198	SM1
Phypoly-transcript-00759	2.99438e-52	1.40475	0.98	0.798	4.52751e-48	0	TRPM7_HUMAN	GO:0005216|GO:0006811|GO:0016020|GO:0055085	2221	Phypoly-transcript-00759	0.182	SM1
Phypoly-transcript-00563	6.63112e-55	1.39765	0.97	0.931	1.00263e-50	0	NPHP3_XENLA	GO:0005515|GO:0005515	TPR repeat region circular profile.|TPR repeat profile.	Phypoly-transcript-00563	0.039	SM1
Phypoly-transcript-02977	1.95262e-56	1.39621	0.98	0.893	2.95237e-52	0	FDHC_METTF	GO:0005215|GO:0006810|GO:0016020	1656	Phypoly-transcript-02977	0.087	SM1
Phypoly-transcript-00390	2.45115e-43	1.3956	0.914	0.558	3.70613e-39	0	MYOH_DICDI	GO:0005515|GO:0003774|GO:0005524|GO:0016459	IQ motif profile.|Myosin head (motor domain)	Phypoly-transcript-00390	0.356	SM1
Phypoly-transcript-01126	4.46663e-50	1.39312	0.975	0.896	6.75354e-46	0	IF4G1_ORYSJ	GO:0003723|GO:0005515	2493	Phypoly-transcript-01126	0.079	SM1
Phypoly-transcript-18797	1.62852e-36	1.38826	0.944	0.676	2.46233e-32	0	ADXL_DANRE	GO:0009055|GO:0051536|GO:0009055|GO:0051536|GO:0009055|GO:0051537	2Fe-2S ferredoxin-type iron-sulfur binding domain profile.|2Fe-2S iron-sulfur cluster binding domain|Adrenodoxin family, iron-sulfur binding region signature.	Phypoly-transcript-18797	0.268	SM1
Phypoly-transcript-02865	1.01404e-41	1.38231	0.924	0.659	1.53323e-37	0	noGene	GO:0005198|GO:0007155|GO:0015629	4832	Phypoly-transcript-02865	0.265	SM1
Phypoly-transcript-03221	4.71856e-43	1.38227	0.919	0.454	7.13447e-39	0	MFS11_XENTR	GO:0016021|GO:0055085	2392	Phypoly-transcript-03221	0.465	SM1
Phypoly-transcript-05883	1.71507e-42	1.38221	0.934	0.587	2.59319e-38	0	SUOX_HUMAN	GO:0043546|GO:0055114|GO:0020037|GO:0009055|GO:0055114|GO:0016491|GO:0030151|GO:0055114|GO:0020037	Eukaryotic molybdopterin oxidoreductases signature.|Cytochrome b5 family, heme-binding domain profile.|Oxidoreductase molybdopterin binding domain|Mo-co oxidoreductase dimerisation domain|Cytochrome b5-like Heme/Steroid binding domain	Phypoly-transcript-05883	0.347	SM1
Phypoly-transcript-12221	4.73759e-40	1.38209	0.944	0.702	7.16323e-36	0	CJ011_MOUSE	GO:0005515	2337	Phypoly-transcript-12221	0.242	SM1
Phypoly-transcript-02173	1.86405e-49	1.37887	0.98	0.806	2.81844e-45	0	7TMK2_DICDI	GO:0004674|GO:0006468|GO:0004672|GO:0005524|GO:0006468|GO:0004672|GO:0005524|GO:0006468	Serine/Threonine protein kinases active-site signature.|Protein kinase domain|Protein kinase domain profile.	Phypoly-transcript-02173	0.174	SM1
Phypoly-transcript-05430	1.062e-60	1.37712	0.99	0.905	1.60574e-56	0	NUD14_ARATH	GO:0005509|GO:0005509	EF-hand domain pair|EF-hand calcium-binding domain profile.	Phypoly-transcript-05430	0.085	SM1
Phypoly-transcript-20756	1.77842e-51	1.37639	0.985	0.983	2.68896e-47	0	CP1A2_RAT	GO:0016705|GO:0055114|GO:0005506|GO:0016705|GO:0020037|GO:0055114	Cytochrome P450 cysteine heme-iron ligand signature.|Cytochrome P450	Phypoly-transcript-20756	0.002	SM1
Phypoly-transcript-06511	1.40367e-40	1.37623	0.939	0.604	2.12235e-36	0	SDCS_STAS1	GO:0005215|GO:0006814|GO:0016020|GO:0055085	4181	Phypoly-transcript-06511	0.335	SM1
Phypoly-transcript-18669	2.66441e-45	1.37224	0.97	0.673	4.02859e-41	0	REDB_DICDI	GO:0016491|GO:0055114	1540	Phypoly-transcript-18669	0.297	SM1
Phypoly-transcript-04972	4.90139e-54	1.36961	0.985	0.934	7.4109e-50	0	U652_DICDI	GO:0005622|GO:0008270|GO:0005622|GO:0008270	B-box zinc finger|Zinc finger B-box type profile.	Phypoly-transcript-04972	0.051	SM1
Phypoly-transcript-06468	3.38623e-41	1.36702	0.914	0.532	5.11998e-37	0	SIR1_ARATH	GO:0070403	4131	Phypoly-transcript-06468	0.382	SM1
Phypoly-transcript-12802	1.35994e-45	1.36689	0.964	0.723	2.05623e-41	0	URED_ARATH	GO:0006807|GO:0016151	4784	Phypoly-transcript-12802	0.241	SM1
Phypoly-transcript-03402	6.92938e-46	1.36545	0.959	0.653	1.04772e-41	0	KIFC3_MOUSE	GO:0003777|GO:0005524|GO:0007018|GO:0008017|GO:0003777|GO:0005524|GO:0007018|GO:0003777|GO:0005524|GO:0007018|GO:0008017	Kinesin motor domain|Kinesin motor domain signature.|Kinesin motor domain profile.	Phypoly-transcript-03402	0.306	SM1
Phypoly-transcript-11583	1.20253e-59	1.36535	0.975	0.757	1.81822e-55	0	TRXB_DICDI	GO:0016491|GO:0055114|GO:0016491|GO:0050660|GO:0055114|GO:0016491|GO:0055114	Pyridine nucleotide-disulphide oxidoreductases class-II active site.|Pyridine nucleotide-disulphide oxidoreductase|Pyridine nucleotide-disulphide oxidoreductase	Phypoly-transcript-11583	0.218	SM1
Phypoly-transcript-07717	2.89354e-36	1.36371	0.919	0.584	4.37504e-32	0	UD3A1_MOUSE	GO:0008152|GO:0016758	4704	Phypoly-transcript-07717	0.335	SM1
Phypoly-transcript-06104	1.06737e-47	1.35984	0.985	0.757	1.61387e-43	0	P4KG6_ARATH	GO:0016773	3006	Phypoly-transcript-06104	0.228	SM1
Phypoly-transcript-20345	1.22318e-38	1.35649	0.924	0.569	1.84945e-34	0	NAA50_DANRE	GO:0008080|GO:0008080	Acetyltransferase (GNAT) family|Gcn5-related N-acetyltransferase (GNAT) domain profile.	Phypoly-transcript-20345	0.355	SM1
Phypoly-transcript-09570	1.32861e-10	1.35587	0.563	0.263	2.00886e-06	0	XLNR_ASPTN	GO:0000981|GO:0005634|GO:0006355|GO:0008270|GO:0000981|GO:0005634|GO:0006355|GO:0008270|GO:0000981|GO:0005634|GO:0006355|GO:0008270	Fungal Zn(2)-Cys(6) binuclear cluster domain|Zn(2)-C6 fungal-type DNA-binding domain signature.|Zn(2)-C6 fungal-type DNA-binding domain profile.	Phypoly-transcript-09570	0.3	SM1
Phypoly-transcript-17450	3.45988e-30	1.35156	0.807	0.393	5.23134e-26	0	GSTF1_ARATH	GO:0005515|GO:0005515	Soluble glutathione S-transferase N-terminal domain profile.|Glutathione S-transferase, N-terminal domain	Phypoly-transcript-17450	0.414	SM1
Phypoly-transcript-08368	3.82169e-37	1.35067	0.934	0.653	5.77839e-33	0	MCFC_DICDI	GO:0005509|GO:0005509	EF-hand calcium-binding domain profile.|EF-hand domain pair	Phypoly-transcript-08368	0.281	SM1
Phypoly-transcript-11165	6.8027e-59	1.3497	0.98	0.803	1.02857e-54	0	ANX12_HYDVU	GO:0005509|GO:0005544|GO:0005509|GO:0005544	Annexins repeated domain signature.|Annexin	Phypoly-transcript-11165	0.177	SM1
Phypoly-transcript-05448	9.74983e-46	1.34919	0.99	0.882	1.47417e-41	0	PLCD3_MOUSE	GO:0004435|GO:0006629|GO:0007165|GO:0035556|GO:0005515|GO:0004435|GO:0006629|GO:0007165|GO:0035556|GO:0005509|GO:0005509|GO:0005515	Phosphatidylinositol-specific phospholipase Y-box domain profile.|C2 domain|Phosphatidylinositol-specific phospholipase C, Y domain|EF-hand calcium-binding domain profile.|EF-hand domain pair|C2 domain profile.	Phypoly-transcript-05448	0.108	SM1
Phypoly-transcript-27544	4.47669e-19	1.34729	0.492	0.15	6.76876e-15	0	VIP2_HUMAN	GO:0003993	2067	Phypoly-transcript-27544	0.342	SM1
Phypoly-transcript-17020	9.43119e-48	1.34646	0.97	0.714	1.426e-43	0	CBX5_MOUSE	GO:0005634	767	Phypoly-transcript-17020	0.256	SM1
Phypoly-transcript-00853	2.24075e-44	1.34458	0.949	0.699	3.38802e-40	0	UVR8_ARATH	GO:0005515|GO:0005515|GO:0007165|GO:0005515|GO:0007165	Ankyrin repeat profile.|TIR domain profile.|TIR domain	Phypoly-transcript-00853	0.25	SM1
Phypoly-transcript-19112	4.41523e-30	1.34408	0.817	0.431	6.67582e-26	0	SENP8_HUMAN	GO:0006508|GO:0008234|GO:0006508|GO:0008234	Ubiquitin-like protease family profile.|Ulp1 protease family, C-terminal catalytic domain	Phypoly-transcript-19112	0.386	SM1
Phypoly-transcript-08298	7.22156e-51	1.34257	0.98	0.844	1.0919e-46	0	P2C34_ORYSJ	GO:0003824|GO:0004722|GO:0006470	Protein phosphatase 2C|Protein phosphatase 2C signature.	Phypoly-transcript-08298	0.136	SM1
Phypoly-transcript-01082	7.56088e-40	1.34181	0.964	0.757	1.1432e-35	0	DNLI_HAEIN	GO:0003910|GO:0005524|GO:0006281|GO:0006310|GO:0003909|GO:0051103	ATP dependent DNA ligase domain|ATP-dependent DNA ligase signature 2.	Phypoly-transcript-01082	0.207	SM1
Phypoly-transcript-02806	3.85253e-49	1.34128	0.964	0.572	5.82503e-45	0	YR831_MIMIV	GO:0004713|GO:0006468|GO:0004672|GO:0005524|GO:0006468|GO:0004672|GO:0006468|GO:0005524	Tyrosine protein kinases specific active-site signature.|Protein kinase domain profile.|Protein tyrosine kinase|Protein kinases ATP-binding region signature.	Phypoly-transcript-02806	0.392	SM1
Phypoly-transcript-03873	2.97423e-45	1.33678	0.944	0.65	4.49704e-41	0	PSD3_SCHPO	GO:0005515|GO:0005509|GO:0004609|GO:0008654|GO:0005515	C2 domain|EF-hand calcium-binding domain profile.|Phosphatidylserine decarboxylase|C2 domain profile.	Phypoly-transcript-03873	0.294	SM1
Phypoly-transcript-00619	7.9834e-48	1.33652	0.99	0.887	1.20709e-43	0	NOS2_CHICK	GO:0016491|GO:0055114|GO:0004517|GO:0006809|GO:0055114|GO:0010181|GO:0016491|GO:0016491|GO:0055114|GO:0016491|GO:0055114|GO:0010181|GO:0016491	Oxidoreductase NAD-binding domain|Nitric oxide synthase, oxygenase domain|Flavodoxin|Ferredoxin reductase-type FAD binding domain profile.|FAD binding domain|Flavodoxin-like domain profile.	Phypoly-transcript-00619	0.103	SM1
Phypoly-transcript-00241	2.45188e-48	1.33554	0.99	0.962	3.70724e-44	0	MVPA_DICDI	GO:0003909|GO:0051103|GO:0003910|GO:0005524|GO:0006281|GO:0006310	ATP-dependent DNA ligase signature 2.|ATP dependent DNA ligase domain	Phypoly-transcript-00241	0.028	SM1
Phypoly-transcript-05655	3.59133e-40	1.33518	0.964	0.769	5.43009e-36	0	BETA_PSEPK	GO:0016614|GO:0055114|GO:0016614|GO:0050660|GO:0055114	1913	Phypoly-transcript-05655	0.195	SM1
Phypoly-transcript-10243	7.79529e-44	1.33364	0.97	0.749	1.17865e-39	0	AROG_SCHPO	GO:0009058	1003	Phypoly-transcript-10243	0.221	SM1
Phypoly-transcript-16992	2.11866e-46	1.33025	0.964	0.708	3.20342e-42	0	GSTA3_RAT	GO:0005515|GO:0005515	Soluble glutathione S-transferase N-terminal domain profile.|Glutathione S-transferase, N-terminal domain	Phypoly-transcript-16992	0.256	SM1
Phypoly-transcript-01385	2.26539e-62	1.32997	0.99	0.988	3.42527e-58	0	noGene	GO:0005096|GO:0005622|GO:0051056|GO:0005096|GO:0005622|GO:0051056	GTPase-activator protein for Ras-like GTPase|Ras GTPase-activating proteins profile.	Phypoly-transcript-01385	0.002	SM1
Phypoly-transcript-03112	5.99851e-49	1.32952	0.98	0.861	9.06974e-45	0	RAP1_CAEEL	GO:0005525|GO:0007264	3588	Phypoly-transcript-03112	0.119	SM1
Phypoly-transcript-23119	1.50706e-27	1.32515	0.832	0.491	2.27868e-23	0	FUCM_HUMAN	GO:0005996|GO:0016853|GO:0048029	3601	Phypoly-transcript-23119	0.341	SM1
Phypoly-transcript-01030	5.58927e-52	1.32302	0.919	0.332	8.45098e-48	0	YF2C_SCHPO	GO:0003676|GO:0004386|GO:0005524|GO:0003677|GO:0005524|GO:0006457|GO:0006457|GO:0003676|GO:0004386|GO:0005524|GO:0003677|GO:0006355	Superfamilies 1 and 2 helicase C-terminal domain profile.|SNF2 family N-terminal domain|FKBP-type peptidyl-prolyl cis-trans isomerase domain profile.|FKBP-type peptidyl-prolyl cis-trans isomerase|Helicase conserved C-terminal domain|'Cold-shock' DNA-binding domain	Phypoly-transcript-01030	0.587	SM1
Phypoly-transcript-07325	3.49613e-51	1.32128	0.985	0.884	5.28614e-47	0	noGene	GO:0005515|GO:0005737|GO:0005515|GO:0005515|GO:0005737|GO:0005515	BAR domain|SH3 domain|BAR domain profile.|Src homology 3 (SH3) domain profile.	Phypoly-transcript-07325	0.101	SM1
Phypoly-transcript-02816	5.19564e-37	1.32096	0.944	0.786	7.85581e-33	0	YC52_SCHPO	GO:0006508|GO:0008233	2940	Phypoly-transcript-02816	0.158	SM1
Phypoly-transcript-19225	1.2554e-41	1.3194	0.929	0.509	1.89817e-37	0	noGene	GO:0008152|GO:0016787	244	Phypoly-transcript-19225	0.42	SM1
Phypoly-transcript-06868	1.29846e-45	1.31932	0.985	0.803	1.96328e-41	0	XYLB_MOUSE	GO:0005975|GO:0016773|GO:0005975|GO:0016773	FGGY family of carbohydrate kinases, N-terminal domain|FGGY family of carbohydrate kinases, C-terminal domain	Phypoly-transcript-06868	0.182	SM1
Phypoly-transcript-14877	1.03656e-37	1.31898	0.929	0.633	1.56727e-33	0	RAB35_RAT	GO:0005525|GO:0007264	3588	Phypoly-transcript-14877	0.296	SM1
Phypoly-transcript-05567	2.83732e-37	1.31788	0.964	0.806	4.29003e-33	0	ABCB1_DICDI	GO:0005524|GO:0006810|GO:0016021|GO:0042626|GO:0055085|GO:0005524|GO:0016887|GO:0005524|GO:0016887|GO:0005524|GO:0006810|GO:0016021|GO:0042626|GO:0055085|GO:0005524|GO:0016887	ABC transporter integral membrane type-1 fused domain profile.|ABC transporter|ATP-binding cassette, ABC transporter-type domain profile.|ABC transporter transmembrane region|ABC transporters family signature.	Phypoly-transcript-05567	0.158	SM1
Phypoly-transcript-06719	6.67061e-52	1.31694	0.985	0.697	1.0086e-47	0	SHKD_DICDI	GO:0004674|GO:0006468|GO:0005515|GO:0005515|GO:0005524|GO:0004672|GO:0005524|GO:0006468|GO:0004672|GO:0006468	Serine/Threonine protein kinases active-site signature.|SH2 domain|Src homology 2 (SH2) domain profile.|Protein kinases ATP-binding region signature.|Protein kinase domain profile.|Protein tyrosine kinase	Phypoly-transcript-06719	0.288	SM1
Phypoly-transcript-06009	4.24999e-38	1.31568	0.964	0.757	6.42598e-34	0	noGene	GO:0004252|GO:0006508	4269	Phypoly-transcript-06009	0.207	SM1
Phypoly-transcript-20733	2.15203e-49	1.31558	0.975	0.792	3.25388e-45	0	noGene	GO:0005515|GO:0005525|GO:0007264|GO:0005515|GO:0005525|GO:0005622|GO:0007264	BTB domain profile.|Ras family|BTB/POZ domain|small GTPase Rho family profile.	Phypoly-transcript-20733	0.183	SM1
Phypoly-transcript-13492	1.27773e-35	1.31423	0.975	0.711	1.93193e-31	0	ROC1_SPIOL	GO:0003676|GO:0003676	RNA recognition motif. (a.k.a. RRM, RBD, or RNP domain)|Eukaryotic RNA Recognition Motif (RRM) profile.	Phypoly-transcript-13492	0.264	SM1
Phypoly-transcript-05095	1.82404e-45	1.30828	0.97	0.792	2.75794e-41	0	CP4E2_DROME	GO:0005506|GO:0016705|GO:0020037|GO:0055114|GO:0016705|GO:0055114	Cytochrome P450|Cytochrome P450 cysteine heme-iron ligand signature.	Phypoly-transcript-05095	0.178	SM1
Phypoly-transcript-06921	4.42356e-48	1.30813	0.975	0.824	6.68842e-44	0	FAD5A_DICDI	GO:0020037|GO:0020037|GO:0006629	Cytochrome b5 family, heme-binding domain profile.|Cytochrome b5-like Heme/Steroid binding domain|Fatty acid desaturase	Phypoly-transcript-06921	0.151	SM1
Phypoly-transcript-05381	3.31393e-41	1.30628	0.848	0.329	5.01066e-37	0	OGFD2_HUMAN	GO:0005089|GO:0035023|GO:0016491|GO:0016706|GO:0055114|GO:0005089|GO:0035023|GO:0005515|GO:0016491|GO:0016706|GO:0055114	Dbl homology (DH) domain profile.|Fe(2+) 2-oxoglutarate dioxygenase domain profile.|RhoGEF domain|F-box domain profile.|2OG-Fe(II) oxygenase superfamily	Phypoly-transcript-05381	0.519	SM1
Phypoly-transcript-09711	1.10746e-27	1.30502	0.883	0.621	1.67448e-23	0	QKI_RAT	GO:0003723	2267	Phypoly-transcript-09711	0.262	SM1
Phypoly-transcript-03776	3.04686e-37	1.30432	0.924	0.601	4.60685e-33	0	SC24A_BOVIN	GO:0006886|GO:0006888|GO:0030127|GO:0006886|GO:0006888|GO:0008270|GO:0030127|GO:0006886|GO:0006888|GO:0030127	Sec23/Sec24 trunk domain|Sec23/Sec24 zinc finger|Sec23/Sec24 helical domain	Phypoly-transcript-03776	0.323	SM1
Phypoly-transcript-26166	1.71127e-39	1.29846	0.934	0.59	2.58744e-35	0	H33_VITVI	GO:0003677|GO:0000786|GO:0003677|GO:0006334|GO:0000786|GO:0003677|GO:0006334	Core histone H2A/H2B/H3/H4|Histone H3 signature 1.|Histone H3 signature 2.	Phypoly-transcript-26166	0.344	SM1
Phypoly-transcript-19206	6.78385e-36	1.29833	0.909	0.526	1.02572e-31	0	RAN_XENLA	GO:0003924|GO:0005525|GO:0006184|GO:0006886|GO:0006913|GO:0007165|GO:0005525|GO:0007264	small GTPase Ran family profile.|Ras family	Phypoly-transcript-19206	0.383	SM1
Phypoly-transcript-04813	2.73406e-37	1.29367	0.944	0.621	4.13391e-33	0	TBC24_MOUSE	GO:0005097|GO:0032313|GO:0005097|GO:0032313	Rab-GTPase-TBC domain|TBC/rab GAP domain profile.	Phypoly-transcript-04813	0.323	SM1
Phypoly-transcript-19964	1.10546e-29	1.29263	0.883	0.604	1.67145e-25	0	FKBP1_DICDI	GO:0006457|GO:0006457	FKBP-type peptidyl-prolyl cis-trans isomerase|FKBP-type peptidyl-prolyl cis-trans isomerase domain profile.	Phypoly-transcript-19964	0.279	SM1
Phypoly-transcript-16641	2.44174e-38	1.28954	0.954	0.766	3.69191e-34	0	YL281_MIMIV	GO:0008152|GO:0016846	1820	Phypoly-transcript-16641	0.188	SM1
Phypoly-transcript-15409	9.79195e-50	1.28836	0.975	0.789	1.48054e-45	0	noGene	GO:0005515|GO:0008270|GO:0005515|GO:0008270	Ring finger domain|Zinc finger RING-type profile.	Phypoly-transcript-15409	0.186	SM1
Phypoly-transcript-11373	4.00841e-40	1.28444	0.924	0.604	6.06072e-36	0	RAB18_CHICK	GO:0005515|GO:0005525|GO:0007264	F-box domain profile.|Ras family	Phypoly-transcript-11373	0.32	SM1
Phypoly-transcript-08354	4.36549e-46	1.28381	0.97	0.812	6.60062e-42	0	ALKMO_MOUSE	GO:0005506|GO:0006633|GO:0016491|GO:0055114	1573	Phypoly-transcript-08354	0.158	SM1
Phypoly-transcript-06156	7.31232e-47	1.28369	0.97	0.734	1.10562e-42	0	SLX8_SCHPO	GO:0005515|GO:0005515|GO:0008270	Armadillo/plakoglobin ARM repeat profile.|Zinc finger RING-type profile.	Phypoly-transcript-06156	0.236	SM1
Phypoly-transcript-05100	5.94934e-31	1.28291	0.868	0.54	8.9954e-27	0	MGP2_DICDI	GO:0007165|GO:0007165	RhoGAP domain|Rho GTPase-activating proteins domain profile.	Phypoly-transcript-05100	0.328	SM1
Phypoly-transcript-09972	2.35589e-42	1.28203	0.975	0.642	3.56211e-38	0	SERA_DICDI	GO:0008152|GO:0016597|GO:0008152|GO:0016616|GO:0051287|GO:0055114|GO:0016616|GO:0048037|GO:0055114|GO:0016616|GO:0048037|GO:0055114|GO:0016616|GO:0048037|GO:0055114	ACT domain profile.|D-isomer specific 2-hydroxyacid dehydrogenase, catalytic domain|D-isomer specific 2-hydroxyacid dehydrogenases signature 3.|D-isomer specific 2-hydroxyacid dehydrogenases NAD-binding signature.|D-isomer specific 2-hydroxyacid dehydrogenase, NAD binding domain	Phypoly-transcript-09972	0.333	SM1
Phypoly-transcript-02887	1.77959e-59	1.28187	0.99	0.913	2.69074e-55	0	UN13C_HUMAN	GO:0005515|GO:0005515	C2 domain|C2 domain profile.	Phypoly-transcript-02887	0.077	SM1
Phypoly-transcript-02242	5.37033e-45	1.28018	0.949	0.442	8.11993e-41	0	CDC27_HUMAN	GO:0005515|GO:0005515|GO:0005515	TPR repeat region circular profile.|TPR repeat profile.|Tetratricopeptide repeat	Phypoly-transcript-02242	0.507	SM1
Phypoly-transcript-15253	2.46237e-22	1.27764	0.726	0.384	3.7231e-18	0	MICA3_MOUSE	GO:0005515|GO:0005515	Calponin homology (CH) domain|Calponin homology domain profile.	Phypoly-transcript-15253	0.342	SM1
Phypoly-transcript-08262	4.04894e-39	1.27729	0.924	0.488	6.122e-35	0	FBXW7_DROME	GO:0005515|GO:0005515|GO:0005515|GO:0005515	WD domain, G-beta repeat|Trp-Asp (WD) repeats profile.|Trp-Asp (WD) repeats circular profile.|F-box domain	Phypoly-transcript-08262	0.436	SM1
Phypoly-transcript-03048	1.4197e-37	1.27665	0.822	0.35	2.14659e-33	0	WDR78_MOUSE	GO:0005515|GO:0005515|GO:0005515	Trp-Asp (WD) repeats circular profile.|Trp-Asp (WD) repeats profile.|WD domain, G-beta repeat	Phypoly-transcript-03048	0.472	SM1
Phypoly-transcript-05512	1.9732e-46	1.27602	0.975	0.853	2.98347e-42	0	PK4_DICDI	GO:0004672|GO:0005524|GO:0006468|GO:0004674|GO:0006468|GO:0004672|GO:0005524|GO:0006468	Protein kinase domain profile.|Serine/Threonine protein kinases active-site signature.|Protein kinase domain	Phypoly-transcript-05512	0.122	SM1
Phypoly-transcript-12147	3.34064e-33	1.27504	0.787	0.321	5.05105e-29	0	noGene	GO:0004649|GO:0005975	3130	Phypoly-transcript-12147	0.466	SM1
Phypoly-transcript-02803	7.50276e-41	1.27434	0.959	0.725	1.13442e-36	0	YR617_MIMIV	GO:0016491|GO:0016706|GO:0055114	1580	Phypoly-transcript-02803	0.234	SM1
Phypoly-transcript-08654	2.96686e-43	1.27378	0.975	0.803	4.48589e-39	0	MYST1_ARATH	GO:0005634|GO:0006355|GO:0016747	2562	Phypoly-transcript-08654	0.172	SM1
Phypoly-transcript-02833	1.09542e-46	1.27299	0.975	0.824	1.65628e-42	0	PHG2_DICDI	GO:0007165|GO:0005524|GO:0004672|GO:0005524|GO:0006468|GO:0004672|GO:0006468|GO:0007165|GO:0004674|GO:0006468	Ras-associating (RA) domain profile.|Protein kinases ATP-binding region signature.|Protein kinase domain profile.|Protein tyrosine kinase|Ras association (RalGDS/AF-6) domain|Serine/Threonine protein kinases active-site signature.	Phypoly-transcript-02833	0.151	SM1
Phypoly-transcript-22459	5.31452e-28	1.27114	0.893	0.659	8.03556e-24	0	VANX_ENTFA	GO:0005618|GO:0006508|GO:0008237|GO:0016805	987	Phypoly-transcript-22459	0.234	SM1
Phypoly-transcript-05397	2.22424e-43	1.27108	0.959	0.665	3.36305e-39	0	Y1628_METJA	GO:0005515	2261	Phypoly-transcript-05397	0.294	SM1
Phypoly-transcript-08267	1.85239e-55	1.26473	0.985	0.893	2.80081e-51	0	GPA1_DICDI	GO:0003924|GO:0004871|GO:0007186|GO:0019001|GO:0031683	1706	Phypoly-transcript-08267	0.092	SM1
Phypoly-transcript-00903	1.35762e-49	1.26341	0.99	0.951	2.05272e-45	0	YQEH_BACSU	GO:0005525	57	Phypoly-transcript-00903	0.039	SM1
Phypoly-transcript-02408	4.18074e-42	1.25926	0.944	0.578	6.32129e-38	0	TF3B_MOUSE	GO:0017025	4478	Phypoly-transcript-02408	0.366	SM1
Phypoly-transcript-15782	4.7692e-39	1.2589	0.949	0.624	7.21103e-35	0	noGene	GO:0005515|GO:0007154|GO:0035091|GO:0005515|GO:0007154|GO:0035091	PX domain profile.|PX domain	Phypoly-transcript-15782	0.325	SM1
Phypoly-transcript-14951	1.31853e-24	1.25856	0.843	0.52	1.99362e-20	0	DCPS_ASCSU	GO:0000290|GO:0016787	4024	Phypoly-transcript-14951	0.323	SM1
Phypoly-transcript-09715	2.06346e-45	1.25771	0.98	0.809	3.11995e-41	0	ATG18_DICDI	GO:0005515	4874	Phypoly-transcript-09715	0.171	SM1
Phypoly-transcript-13873	4.31848e-44	1.25653	0.964	0.786	6.52954e-40	0	Y4781_DICDI	GO:0005509|GO:0005509|GO:0005509	EF-hand calcium-binding domain profile.|EF-hand domain pair|EF hand	Phypoly-transcript-13873	0.178	SM1
Phypoly-transcript-08742	1.39396e-53	1.25625	0.99	0.916	2.10766e-49	0	MTS1_SELML	GO:0000287|GO:0010333|GO:0016829	4359	Phypoly-transcript-08742	0.074	SM1
Phypoly-transcript-11113	4.08383e-42	1.25437	0.975	0.737	6.17475e-38	0	2NPD_STAAW	GO:0018580|GO:0055114	2721	Phypoly-transcript-11113	0.238	SM1
Phypoly-transcript-10448	7.2304e-35	1.25426	0.853	0.448	1.09324e-30	0	PARP2_MOUSE	GO:0003950|GO:0006471|GO:0003950|GO:0006471|GO:0003956|GO:0006471	PARP alpha-helical domain profile.|Poly(ADP-ribose) polymerase, regulatory domain|NAD:arginine ADP-ribosyltransferase	Phypoly-transcript-10448	0.405	SM1
Phypoly-transcript-08721	1.14676e-35	1.25385	0.914	0.624	1.7339e-31	0	SYN3_HUMAN	GO:0007269|GO:0008021	4319	Phypoly-transcript-08721	0.29	SM1
Phypoly-transcript-17194	9.63114e-32	1.25243	0.934	0.691	1.45623e-27	0	TNNC2_DROME	GO:0005509|GO:0005509	EF-hand calcium-binding domain profile.|EF-hand domain pair	Phypoly-transcript-17194	0.243	SM1
Phypoly-transcript-17830	9.2249e-32	1.25181	0.888	0.604	1.39481e-27	0	UTP11_RAT	GO:0006364|GO:0032040	4794	Phypoly-transcript-17830	0.284	SM1
Phypoly-transcript-09502	5.22436e-38	1.25111	0.944	0.668	7.89923e-34	0	PIRL5_ORYSJ	GO:0005515|GO:0004672|GO:0005524|GO:0006468|GO:0004672|GO:0005524|GO:0006468|GO:0005524	Leucine-rich repeat profile.|Protein kinase domain|Protein kinase domain profile.|Protein kinases ATP-binding region signature.	Phypoly-transcript-09502	0.276	SM1
Phypoly-transcript-02433	5.50655e-44	1.25043	0.959	0.792	8.3259e-40	0	LYAG_RAT	GO:0004553|GO:0005975	1872	Phypoly-transcript-02433	0.167	SM1
Phypoly-transcript-12860	7.3695e-33	1.24917	0.898	0.561	1.11427e-28	0	ATG26_YARLI	GO:0005975|GO:0016758|GO:0030259	1904	Phypoly-transcript-12860	0.337	SM1
Phypoly-transcript-04224	1.29817e-52	1.24768	0.99	0.864	1.96283e-48	0	CALM_SCHPO	GO:0005509|GO:0005509	EF-hand calcium-binding domain profile.|EF-hand domain pair	Phypoly-transcript-04224	0.126	SM1
Phypoly-transcript-04853	5.70992e-39	1.24701	0.975	0.861	8.63339e-35	0	BCS1_YEAST	GO:0005524	426	Phypoly-transcript-04853	0.114	SM1
Phypoly-transcript-03397	1.25143e-41	1.24674	0.97	0.72	1.89216e-37	0	DNLI_HAEIN	GO:0003910|GO:0005524|GO:0006281|GO:0006310	383	Phypoly-transcript-03397	0.25	SM1
Phypoly-transcript-08603	2.49106e-45	1.24655	0.98	0.827	3.76648e-41	0	PKNX2_HUMAN	GO:0003677|GO:0006355|GO:0003700|GO:0006355|GO:0043565	Homeobox KN domain|'Homeobox' domain profile.	Phypoly-transcript-08603	0.153	SM1
Phypoly-transcript-19444	3.34002e-51	1.24472	0.98	0.795	5.05012e-47	0	MBF1C_ARATH	GO:0043565|GO:0043565	Helix-turn-helix|Cro/C1-type HTH domain profile.	Phypoly-transcript-19444	0.185	SM1
Phypoly-transcript-01013	1.4656e-39	1.2441	0.959	0.815	2.21598e-35	0	ASH2L_MOUSE	GO:0005515|GO:0005515	SPRY domain|PHD-finger	Phypoly-transcript-01013	0.144	SM1
Phypoly-transcript-07302	2.72534e-37	1.24265	0.944	0.647	4.12071e-33	0	ODP2_RICBR	GO:0008152|GO:0016746|GO:0008152|GO:0016746	e3 binding domain|2-oxoacid dehydrogenases acyltransferase (catalytic domain)	Phypoly-transcript-07302	0.297	SM1
Phypoly-transcript-00902	9.08357e-44	1.24176	0.939	0.645	1.37344e-39	0	DNLI_HAEIN	GO:0003910|GO:0005524|GO:0006281|GO:0006310	383	Phypoly-transcript-00902	0.294	SM1
Phypoly-transcript-24647	1.76717e-39	1.24116	0.964	0.697	2.67197e-35	0	NDUS4_DICDI	GO:0016651|GO:0022900	1465	Phypoly-transcript-24647	0.267	SM1
Phypoly-transcript-13374	3.14866e-27	1.24083	0.787	0.413	4.76077e-23	0	TERZ_SERMA	GO:0006950|GO:0005515|GO:0005515	TerD domain|C2 domain|C2 domain profile.	Phypoly-transcript-13374	0.374	SM1
Phypoly-transcript-01010	4.30147e-40	1.24067	0.929	0.639	6.50383e-36	0	DNLI_HAEIN	GO:0003910|GO:0005524|GO:0006281|GO:0006310|GO:0003910|GO:0005524|GO:0006281|GO:0006310|GO:0003909|GO:0051103	ATP dependent DNA ligase domain|ATP-dependent DNA ligase family profile.|ATP-dependent DNA ligase signature 2.	Phypoly-transcript-01010	0.29	SM1
Phypoly-transcript-01605	1.02347e-38	1.23786	0.97	0.844	1.54749e-34	0	FRMA_DICDI	GO:0005856	1583	Phypoly-transcript-01605	0.126	SM1
Phypoly-transcript-16411	2.90348e-38	1.23733	0.944	0.645	4.39006e-34	0	PSME3_CHICK	GO:0008537|GO:0008537	Proteasome activator pa28 alpha subunit|Proteasome activator pa28 beta subunit	Phypoly-transcript-16411	0.299	SM1
Phypoly-transcript-13104	3.09437e-33	1.23674	0.904	0.61	4.67869e-29	0	RAP1_PHYPO	GO:0003924|GO:0005525|GO:0006184|GO:0007165|GO:0016020|GO:0005525|GO:0007264	small GTPase Ras family profile.|Ras family	Phypoly-transcript-13104	0.294	SM1
Phypoly-transcript-21527	1.6707e-28	1.23658	0.782	0.355	2.5261e-24	0	noGene	GO:0005524|GO:0044267	4346	Phypoly-transcript-21527	0.427	SM1
Phypoly-transcript-01706	2.01835e-37	1.2363	0.939	0.647	3.05175e-33	0	DNLI_HAEIN	GO:0003910|GO:0005524|GO:0006281|GO:0006310|GO:0003909|GO:0051103	ATP dependent DNA ligase domain|ATP-dependent DNA ligase signature 2.	Phypoly-transcript-01706	0.292	SM1
Phypoly-transcript-02244	2.9341e-41	1.23603	0.964	0.798	4.43636e-37	0	DARA_DICDI	GO:0005515|GO:0005515	Armadillo/beta-catenin-like repeat|Armadillo/plakoglobin ARM repeat profile.	Phypoly-transcript-02244	0.166	SM1
Phypoly-transcript-02751	1.30214e-32	1.23425	0.909	0.645	1.96883e-28	0	SGTA_BOVIN	GO:0005515|GO:0005515	TPR repeat region circular profile.|TPR repeat profile.	Phypoly-transcript-02751	0.264	SM1
Phypoly-transcript-07311	6.10943e-33	1.23204	0.863	0.512	9.23746e-29	0	noGene	GO:0005741|GO:0055085	1487	Phypoly-transcript-07311	0.351	SM1
Phypoly-transcript-12696	8.93818e-47	1.2319	0.975	0.789	1.35145e-42	0	RACH_DICDI	GO:0005525|GO:0007264|GO:0005525|GO:0005622|GO:0007264	Ras family|small GTPase Rho family profile.	Phypoly-transcript-12696	0.186	SM1
Phypoly-transcript-23360	5.46908e-44	1.22997	0.964	0.685	8.26925e-40	0	RL44_CANTR	GO:0003735|GO:0005622|GO:0005840|GO:0006412	3774	Phypoly-transcript-23360	0.279	SM1
Phypoly-transcript-06455	5.65459e-39	1.22757	0.959	0.731	8.54974e-35	0	GPAT3_RAT	GO:0008152|GO:0016746	145	Phypoly-transcript-06455	0.228	SM1
Phypoly-transcript-07617	3.16098e-35	1.22692	0.893	0.512	4.7794e-31	0	TUB4_AGRVI	GO:0016021|GO:0055085	2392	Phypoly-transcript-07617	0.381	SM1
Phypoly-transcript-08691	3.36949e-48	1.22616	0.975	0.803	5.09467e-44	0	COP1_PEA	GO:0046872|GO:0005515|GO:0008270	Zinc finger, C3HC4 type (RING finger)|Zinc finger RING-type profile.	Phypoly-transcript-08691	0.172	SM1
Phypoly-transcript-19573	1.43137e-40	1.22612	0.954	0.789	2.16424e-36	0	YGV8_SCHPO	GO:0016020	1301	Phypoly-transcript-19573	0.165	SM1
Phypoly-transcript-06606	1.21056e-46	1.2232	0.985	0.786	1.83036e-42	0	SIR7_BOVIN	GO:0070403	4131	Phypoly-transcript-06606	0.199	SM1
Phypoly-transcript-25659	7.85676e-46	1.22127	0.878	0.376	1.18794e-41	0	noGene	GO:0005085|GO:0005622|GO:0007264|GO:0005085|GO:0005622|GO:0007264|GO:0005085|GO:0005622|GO:0051056|GO:0005085|GO:0005622|GO:0051056	Ras guanine-nucleotide exchange factors catalytic domain profile.|RasGEF domain|Ras guanine-nucleotide exchange factors N-terminal domain profile.|RasGEF N-terminal motif	Phypoly-transcript-25659	0.502	SM1
Phypoly-transcript-17375	4.84532e-35	1.22009	0.868	0.454	7.32612e-31	0	noGene	GO:0005525	57	Phypoly-transcript-17375	0.414	SM1
Phypoly-transcript-08154	2.73581e-40	1.21993	0.959	0.607	4.13654e-36	0	IMA_SOLLC	GO:0005515|GO:0005515	Armadillo/plakoglobin ARM repeat profile.|Armadillo/beta-catenin-like repeat	Phypoly-transcript-08154	0.352	SM1
Phypoly-transcript-28653	3.69567e-31	1.21975	0.888	0.546	5.58786e-27	0	noGene	GO:0008152|GO:0008168	2474	Phypoly-transcript-28653	0.342	SM1
Phypoly-transcript-01116	2.69362e-45	1.21838	0.98	0.766	4.07276e-41	0	ANR52_CHICK	GO:0005515|GO:0005515	Ankyrin repeat profile.|Ankyrin repeat	Phypoly-transcript-01116	0.214	SM1
Phypoly-transcript-09170	4.81227e-39	1.21817	0.944	0.659	7.27616e-35	0	YEXA_SCHPO	GO:0003824	4399	Phypoly-transcript-09170	0.285	SM1
Phypoly-transcript-18687	4.45414e-40	1.21811	0.964	0.723	6.73465e-36	0	noGene	GO:0003712|GO:0006355	2285	Phypoly-transcript-18687	0.241	SM1
Phypoly-transcript-21449	6.91909e-47	1.21623	0.975	0.754	1.04617e-42	0	YOCC_SCHPO	GO:0008270|GO:0008270|GO:0008270	LIM domain profile.|LIM zinc-binding domain signature.|LIM domain	Phypoly-transcript-21449	0.221	SM1
Phypoly-transcript-08766	1.47332e-38	1.21506	0.939	0.697	2.22766e-34	0	PTPA2_DICDI	GO:0019211	3079	Phypoly-transcript-08766	0.242	SM1
Phypoly-transcript-03785	3.20446e-32	1.21243	0.883	0.529	4.84514e-28	0	DNLI_HAEIN	GO:0003910|GO:0005524|GO:0006281|GO:0006310	383	Phypoly-transcript-03785	0.354	SM1
Phypoly-transcript-16748	1.51113e-35	1.20871	0.934	0.639	2.28483e-31	0	YC8E_SCHPO	GO:0008060|GO:0008270|GO:0032312|GO:0008060|GO:0008270|GO:0032312	Putative GTPase activating protein for Arf|ARF GTPase-activating proteins domain profile.	Phypoly-transcript-16748	0.295	SM1
Phypoly-transcript-10136	6.93789e-29	1.20716	0.817	0.431	1.04901e-24	0	OYEC_SCHPO	GO:0010181|GO:0016491|GO:0055114	2684	Phypoly-transcript-10136	0.386	SM1
Phypoly-transcript-12476	1.46684e-34	1.204	0.949	0.743	2.21786e-30	0	NADK2_ARATH	GO:0003951|GO:0006741|GO:0008152	420	Phypoly-transcript-12476	0.206	SM1
Phypoly-transcript-09068	2.6783e-39	1.20372	0.914	0.538	4.04959e-35	0	SIR1_ORYSI	GO:0008270|GO:0070403|GO:0008270	Zn-finger in ubiquitin-hydrolases and other protein|Sir2 family|Zinc finger UBP-type profile.	Phypoly-transcript-09068	0.376	SM1
Phypoly-transcript-16632	2.50012e-41	1.19747	0.964	0.751	3.78019e-37	0	LVR_LEIAQ	GO:0008152|GO:0016491|GO:0016491	short chain dehydrogenase|Short-chain dehydrogenases/reductases family signature.	Phypoly-transcript-16632	0.213	SM1
Phypoly-transcript-03941	1.48106e-43	1.19552	0.98	0.838	2.23936e-39	0	STI1_SCHPO	GO:0005515|GO:0005515|GO:0005515|GO:0005515	TPR repeat region circular profile.|SET domain profile.|TPR repeat profile.|SET domain	Phypoly-transcript-03941	0.142	SM1
Phypoly-transcript-07050	6.87693e-42	1.19522	0.975	0.749	1.03979e-37	0	BZPF_DICDI	GO:0003700|GO:0006355|GO:0043565|GO:0003700|GO:0006355|GO:0043565	bZIP transcription factor|Basic-leucine zipper (bZIP) domain profile.	Phypoly-transcript-07050	0.226	SM1
Phypoly-transcript-17504	1.58938e-30	1.19358	0.904	0.621	2.40314e-26	0	RAB1_THEPA	GO:0005525|GO:0007264	3588	Phypoly-transcript-17504	0.283	SM1
Phypoly-transcript-12349	2.00781e-50	1.19355	0.985	0.777	3.03581e-46	0	YHA8_YEAST	GO:0005215|GO:0006810|GO:0016020	1656	Phypoly-transcript-12349	0.208	SM1
Phypoly-transcript-26692	3.53864e-30	1.19318	0.909	0.645	5.35043e-26	0	DYL1_DROME	GO:0005875|GO:0007017|GO:0005875|GO:0007017	Dynein light chain type 1|Dynein light chain type 1 signature.	Phypoly-transcript-26692	0.264	SM1
Phypoly-transcript-02252	4.86163e-49	1.19176	0.97	0.841	7.35078e-45	0	KPYK_DICDI	GO:0004743|GO:0006096|GO:0000287|GO:0004743|GO:0006096|GO:0030955	Pyruvate kinase active site signature.|Pyruvate kinase, barrel domain	Phypoly-transcript-02252	0.129	SM1
Phypoly-transcript-11810	8.39227e-35	1.19136	0.848	0.35	1.26891e-30	0	noGene	GO:0005524|GO:0044267	4346	Phypoly-transcript-11810	0.498	SM1
Phypoly-transcript-03408	7.39102e-53	1.18774	0.98	0.803	1.11752e-48	0	ABCD2_RAT	GO:0005524|GO:0016887|GO:0005524|GO:0016887|GO:0005524|GO:0006810|GO:0016021|GO:0042626|GO:0055085|GO:0005524|GO:0016887|GO:0006810|GO:0016020	ATP-binding cassette, ABC transporter-type domain profile.|ABC transporter|ABC transporter integral membrane type-1 fused domain profile.|ABC transporters family signature.|ABC transporter transmembrane region 2	Phypoly-transcript-03408	0.177	SM1
Phypoly-transcript-02793	2.16032e-41	1.1877	0.975	0.754	3.2664e-37	0	CENPI_CHICK	GO:0000776|GO:0034508	2503	Phypoly-transcript-02793	0.221	SM1
Phypoly-transcript-12179	1.27387e-51	1.18617	0.975	0.772	1.92609e-47	0	YXEI_BACSU	GO:0016787	2345	Phypoly-transcript-12179	0.203	SM1
Phypoly-transcript-00888	1.08565e-40	1.18411	0.949	0.746	1.6415e-36	0	RAD5_SCHPO	GO:0003677|GO:0005524|GO:0003676|GO:0004386|GO:0005524|GO:0003676|GO:0004386|GO:0005524	SNF2 family N-terminal domain|Superfamilies 1 and 2 helicase C-terminal domain profile.|Helicase conserved C-terminal domain	Phypoly-transcript-00888	0.203	SM1
Phypoly-transcript-04081	5.68623e-30	1.18398	0.949	0.717	8.59759e-26	0	TF3B_MOUSE	GO:0017025|GO:0005634|GO:0008270|GO:0045893	Transcription factor TFIIB repeat|Brf1-like TBP-binding domain	Phypoly-transcript-04081	0.232	SM1
Phypoly-transcript-05190	2.53333e-42	1.18225	0.975	0.665	3.8304e-38	0	CALM_CHLRE	GO:0005509|GO:0005509|GO:0016021|GO:0055085	EF-hand calcium-binding domain profile.|EF-hand domain pair|Sodium/calcium exchanger protein	Phypoly-transcript-05190	0.31	SM1
Phypoly-transcript-04889	4.20637e-46	1.18116	0.97	0.835	6.36003e-42	0	FTSH_CAUCN	GO:0004222|GO:0005524|GO:0006508|GO:0005524|GO:0005524	Peptidase family M41|ATPase family associated with various cellular activities (AAA)|AAA-protein family signature.	Phypoly-transcript-04889	0.135	SM1
Phypoly-transcript-07214	7.09524e-38	1.18081	0.964	0.697	1.0728e-33	0	LRC40_XENTR	GO:0005515|GO:0004725|GO:0016311|GO:0016791|GO:0006470|GO:0008138|GO:0006470|GO:0008138|GO:0016311|GO:0016791|GO:0005515	Leucine-rich repeat profile.|Tyrosine specific protein phosphatases active site.|Dual specificity protein phosphatase family profile.|Dual specificity phosphatase, catalytic domain|Tyrosine specific protein phosphatases family profile.|Leucine Rich Repeat	Phypoly-transcript-07214	0.267	SM1
Phypoly-transcript-13491	1.74353e-29	1.18066	0.949	0.665	2.63621e-25	0	YOUD_CAEEL	GO:0005515|GO:0008270|GO:0005515|GO:0008270	Ring finger domain|Zinc finger RING-type profile.	Phypoly-transcript-13491	0.284	SM1
Phypoly-transcript-00555	1.58502e-43	1.17993	0.975	0.853	2.39655e-39	0	SNF21_SCHPO	GO:0003677|GO:0005524|GO:0005515|GO:0003676|GO:0004386|GO:0005524|GO:0005515|GO:0005524|GO:0005634|GO:0006355|GO:0016818|GO:0003676|GO:0004386|GO:0005524|GO:0005524|GO:0005634|GO:0006355|GO:0016818	SNF2 family N-terminal domain|Bromodomain profile.|Superfamilies 1 and 2 helicase C-terminal domain profile.|Bromodomain|QLQ domain profile.|Helicase conserved C-terminal domain|QLQ	Phypoly-transcript-00555	0.122	SM1
Phypoly-transcript-01161	1.90452e-40	1.17891	0.924	0.535	2.87963e-36	0	CAR_MYCMM	GO:0003824|GO:0008152|GO:0008270	AMP-binding enzyme|Zinc finger, ZZ type	Phypoly-transcript-01161	0.389	SM1
Phypoly-transcript-01225	8.30194e-40	1.17855	0.954	0.728	1.25525e-35	0	TRPM2_MOUSE	GO:0005216|GO:0006811|GO:0016020|GO:0055085	2221	Phypoly-transcript-01225	0.226	SM1
Phypoly-transcript-25585	1.08675e-37	1.17574	0.782	0.246	1.64317e-33	0	noGene	GO:0007154|GO:0016020|GO:0005515|GO:0007154|GO:0016020	DSL domain profile.|EGF-like domain profile.|Delta serrate ligand	Phypoly-transcript-25585	0.536	SM1
Phypoly-transcript-22190	1.23326e-41	1.17551	0.97	0.682	1.86469e-37	0	RPB7_DICDI	GO:0003899|GO:0006351|GO:0003723	SHS2 domain found in N terminus of Rpb7p/Rpc25p/MJ0397|S1 RNA binding domain	Phypoly-transcript-22190	0.288	SM1
Phypoly-transcript-11739	1.16096e-36	1.17484	0.949	0.699	1.75537e-32	0	NPD2_BRADU	GO:0070403	4131	Phypoly-transcript-11739	0.25	SM1
Phypoly-transcript-08911	2.89456e-33	1.17392	0.939	0.714	4.37657e-29	0	UMPS_MOUSE	GO:0009116|GO:0004590|GO:0006207	Phosphoribosyl transferase domain|Orotidine 5'-phosphate decarboxylase / HUMPS family	Phypoly-transcript-08911	0.225	SM1
Phypoly-transcript-02755	4.92952e-38	1.1726	0.98	0.876	7.45343e-34	0	TPP1_MACFA	GO:0004252|GO:0006508	4269	Phypoly-transcript-02755	0.104	SM1
Phypoly-transcript-21916	3.65903e-24	1.17208	0.706	0.295	5.53246e-20	0	ACTP_ACACA	GO:0003779|GO:0005622|GO:0003779|GO:0005622	ADF-H domain profile.|Cofilin/tropomyosin-type actin-binding protein	Phypoly-transcript-21916	0.411	SM1
Phypoly-transcript-14839	2.3525e-32	1.17168	0.898	0.613	3.55698e-28	0	RM47_BOVIN	GO:0003735|GO:0005761|GO:0006412	2508	Phypoly-transcript-14839	0.285	SM1
Phypoly-transcript-04939	8.4599e-35	1.17023	0.919	0.621	1.27914e-30	0	CALM_RENRE	GO:0005509|GO:0005509	EF-hand calcium-binding domain profile.|EF-hand domain pair	Phypoly-transcript-04939	0.298	SM1
Phypoly-transcript-06240	3.03276e-27	1.16835	0.888	0.59	4.58553e-23	0	HEXB_FELCA	GO:0004553|GO:0005975	1840	Phypoly-transcript-06240	0.298	SM1
Phypoly-transcript-09545	3.59026e-25	1.16834	0.848	0.546	5.42848e-21	0	FEN1_TRIAD	GO:0003676|GO:0003676|GO:0004518|GO:0004518|GO:0006281	R3H domain profile.|R3H domain|XPG I-region|XPG N-terminal domain	Phypoly-transcript-09545	0.302	SM1
Phypoly-transcript-03700	6.90659e-49	1.1682	0.98	0.841	1.04428e-44	0	U652_DICDI	GO:0005622|GO:0008270	4955	Phypoly-transcript-03700	0.139	SM1
Phypoly-transcript-16567	7.99378e-38	1.16586	0.944	0.587	1.20866e-33	0	PIWL1_MOUSE	GO:0005515|GO:0005515|GO:0005515|GO:0005515	Piwi domain profile.|PAZ domain profile.|PAZ domain|Piwi domain	Phypoly-transcript-16567	0.357	SM1
Phypoly-transcript-25726	1.05509e-43	1.16518	0.964	0.737	1.59529e-39	0	PRPB_VIBCH	GO:0003824|GO:0008152	2241	Phypoly-transcript-25726	0.227	SM1
Phypoly-transcript-07943	1.0528e-33	1.16488	0.985	0.835	1.59183e-29	0	NUD14_ARATH	GO:0005509|GO:0005509	EF-hand calcium-binding domain profile.|EF-hand domain pair	Phypoly-transcript-07943	0.15	SM1
Phypoly-transcript-00786	4.74199e-40	1.1647	0.964	0.705	7.16989e-36	0	ABCCC_DICDI	GO:0005524|GO:0016887|GO:0005524|GO:0016887|GO:0005524|GO:0006810|GO:0016021|GO:0042626|GO:0055085|GO:0005524|GO:0006810|GO:0016021|GO:0042626|GO:0055085|GO:0005524|GO:0016887	ATP-binding cassette, ABC transporter-type domain profile.|ABC transporters family signature.|ABC transporter integral membrane type-1 fused domain profile.|ABC transporter transmembrane region|ABC transporter	Phypoly-transcript-00786	0.259	SM1
Phypoly-transcript-18753	1.10626e-26	1.16269	0.807	0.439	1.67266e-22	0	UBP44_XENTR	GO:0004221|GO:0006511|GO:0008270|GO:0008270	Ubiquitin carboxyl-terminal hydrolase|Zn-finger in ubiquitin-hydrolases and other protein|Zinc finger UBP-type profile.	Phypoly-transcript-18753	0.368	SM1
Phypoly-transcript-04040	4.94424e-40	1.16241	0.975	0.751	7.4757e-36	0	APMAP_RAT	GO:0009058|GO:0016844	4266	Phypoly-transcript-04040	0.224	SM1
Phypoly-transcript-02601	1.89804e-36	1.16215	0.954	0.72	2.86984e-32	0	NUP62_HUMAN	GO:0005643|GO:0017056	2754	Phypoly-transcript-02601	0.234	SM1
Phypoly-transcript-06127	1.05751e-43	1.16209	0.975	0.841	1.59895e-39	0	GLS3_CAEEL	GO:0005515|GO:0004359|GO:0006541|GO:0005509	Ankyrin repeat profile.|Glutaminase|EF-hand calcium-binding domain profile.	Phypoly-transcript-06127	0.134	SM1
Phypoly-transcript-03891	1.43654e-32	1.16199	0.873	0.512	2.17204e-28	0	Y3800_DICDI	GO:0005515|GO:0005515|GO:0005515|GO:0005515	Ankyrin repeat profile.|Ankyrin repeat|BTB/POZ domain|BTB domain profile.	Phypoly-transcript-03891	0.361	SM1
Phypoly-transcript-01398	1.32067e-43	1.16168	0.985	0.873	1.99686e-39	0	DNLI_HAEIN	GO:0003910|GO:0005524|GO:0006281|GO:0006310|GO:0003910|GO:0005524|GO:0006281|GO:0006310|GO:0003909|GO:0051103	ATP-dependent DNA ligase family profile.|ATP dependent DNA ligase domain|ATP-dependent DNA ligase signature 2.	Phypoly-transcript-01398	0.112	SM1
Phypoly-transcript-04904	8.64815e-45	1.16104	0.98	0.803	1.3076e-40	0	NONO_PONAB	GO:0003676|GO:0003676	RNA recognition motif. (a.k.a. RRM, RBD, or RNP domain)|Eukaryotic RNA Recognition Motif (RRM) profile.	Phypoly-transcript-04904	0.177	SM1
Phypoly-transcript-01288	2.40381e-37	1.16063	0.97	0.801	3.63456e-33	0	GXCDD_DICDI	GO:0005089|GO:0035023|GO:0005515|GO:0005089|GO:0035023	RhoGEF domain|Armadillo/plakoglobin ARM repeat profile.|Dbl homology (DH) domain profile.	Phypoly-transcript-01288	0.169	SM1
Phypoly-transcript-00588	1.44695e-41	1.15993	0.97	0.925	2.1878e-37	0	GEFA_DICDI	GO:0005085|GO:0005622|GO:0051056|GO:0005085|GO:0005622|GO:0051056|GO:0005085|GO:0005622|GO:0007264|GO:0005085|GO:0005622|GO:0007264	Ras guanine-nucleotide exchange factors N-terminal domain profile.|RasGEF N-terminal motif|RasGEF domain|Ras guanine-nucleotide exchange factors catalytic domain profile.	Phypoly-transcript-00588	0.045	SM1
Phypoly-transcript-16125	2.2975e-39	1.15974	0.97	0.717	3.47382e-35	0	noGene	GO:0003677	2032	Phypoly-transcript-16125	0.253	SM1
Phypoly-transcript-05520	2.26121e-38	1.15959	0.949	0.642	3.41896e-34	0	SPPA1_ARATH	GO:0006508|GO:0008233	2948	Phypoly-transcript-05520	0.307	SM1
Phypoly-transcript-03465	2.3591e-38	1.15753	0.944	0.517	3.56696e-34	0	CDK7_DICDI	GO:0005524|GO:0004672|GO:0005524|GO:0006468|GO:0004672|GO:0005524|GO:0006468|GO:0004674|GO:0006468	Protein kinases ATP-binding region signature.|Protein kinase domain|Protein kinase domain profile.|Serine/Threonine protein kinases active-site signature.	Phypoly-transcript-03465	0.427	SM1
Phypoly-transcript-02439	9.40965e-45	1.15651	0.985	0.844	1.42274e-40	0	Y3800_DICDI	GO:0005515|GO:0005515|GO:0005515|GO:0005515|GO:0005515	Bromodomain profile.|Ankyrin repeat profile.|BTB/POZ domain|Bromodomain|BTB domain profile.	Phypoly-transcript-02439	0.141	SM1
Phypoly-transcript-20618	8.8281e-24	1.15648	0.65	0.211	1.33481e-19	0	Y1344_THEON	GO:0003676|GO:0005524|GO:0008026	1028	Phypoly-transcript-20618	0.439	SM1
Phypoly-transcript-10148	6.38928e-40	1.15386	0.964	0.694	9.66059e-36	0	noGene	GO:0004553|GO:0005975|GO:0004553|GO:0005975	Chitinases family 18 active site.|Glycosyl hydrolases family 18	Phypoly-transcript-10148	0.27	SM1
Phypoly-transcript-03042	2.0881e-43	1.15375	0.98	0.829	3.15721e-39	0	DNLI_HAEIN	GO:0003909|GO:0051103|GO:0003910|GO:0005524|GO:0006281|GO:0006310	ATP-dependent DNA ligase signature 2.|ATP dependent DNA ligase domain	Phypoly-transcript-03042	0.151	SM1
Phypoly-transcript-05127	1.18474e-35	1.15335	0.959	0.751	1.79132e-31	0	ODP2_DICDI	GO:0008152|GO:0016746|GO:0008152|GO:0016746	2-oxoacid dehydrogenases acyltransferase (catalytic domain)|e3 binding domain	Phypoly-transcript-05127	0.208	SM1
Phypoly-transcript-19217	3.7943e-32	1.15334	0.817	0.413	5.73699e-28	0	noGene	GO:0008152|GO:0016491	4110	Phypoly-transcript-19217	0.404	SM1
Phypoly-transcript-20249	5.44268e-16	1.15328	0.569	0.269	8.22933e-12	0	NUDT5_HUMAN	GO:0016787|GO:0016787	Nudix hydrolase domain profile.|NUDIX domain	Phypoly-transcript-20249	0.3	SM1
Phypoly-transcript-05786	8.12201e-38	1.15084	0.964	0.734	1.22805e-33	0	TBCD5_HUMAN	GO:0005097|GO:0032313|GO:0005097|GO:0032313	TBC/rab GAP domain profile.|Rab-GTPase-TBC domain	Phypoly-transcript-05786	0.23	SM1
Phypoly-transcript-04192	2.94756e-44	1.14887	0.98	0.867	4.45671e-40	0	BGLB_CLOTH	GO:0004553|GO:0005975|GO:0004553|GO:0005975	Glycosyl hydrolase family 3 C-terminal domain|Glycosyl hydrolase family 3 N terminal domain	Phypoly-transcript-04192	0.113	SM1
Phypoly-transcript-10919	2.34768e-41	1.14766	0.975	0.85	3.54969e-37	0	FDHC_METTF	GO:0005215|GO:0006810|GO:0016020	1656	Phypoly-transcript-10919	0.125	SM1
Phypoly-transcript-00510	5.78054e-42	1.1453	0.97	0.841	8.74018e-38	0	FRMA_DICDI	GO:0005856	1583	Phypoly-transcript-00510	0.129	SM1
Phypoly-transcript-02555	1.55806e-37	1.14471	0.919	0.578	2.35578e-33	0	DNLI_HAEIN	GO:0003909|GO:0051103	415	Phypoly-transcript-02555	0.341	SM1
Phypoly-transcript-16592	6.51094e-38	1.14432	0.954	0.731	9.84454e-34	0	DJ1D_ARATH	GO:0016798	2978	Phypoly-transcript-16592	0.223	SM1
Phypoly-transcript-11604	3.62947e-34	1.14391	0.939	0.65	5.48777e-30	0	Y9865_DICDI	GO:0004672|GO:0005524|GO:0006468|GO:0004672|GO:0005524|GO:0006468	Protein kinase domain|Protein kinase domain profile.	Phypoly-transcript-11604	0.289	SM1
Phypoly-transcript-05080	1.27778e-38	1.14375	0.959	0.656	1.93201e-34	0	DYHC_NEUCR	GO:0016616|GO:0048037|GO:0055114	993	Phypoly-transcript-05080	0.303	SM1
Phypoly-transcript-17076	1.02017e-48	1.14343	0.98	0.772	1.5425e-44	0	CNBP_CHICK	GO:0003676|GO:0008270|GO:0003676|GO:0008270	Zinc knuckle|Zinc finger CCHC-type profile.	Phypoly-transcript-17076	0.208	SM1
Phypoly-transcript-25499	4.77782e-45	1.14234	0.98	0.884	7.22407e-41	0	noGene	GO:0016433	3494	Phypoly-transcript-25499	0.096	SM1
Phypoly-transcript-00248	1.17089e-45	1.14169	0.99	0.948	1.77038e-41	0	GCP2_MOUSE	GO:0003677|GO:0005524|GO:0003676|GO:0004386|GO:0005524|GO:0003676|GO:0004386|GO:0005524	SNF2 family N-terminal domain|Helicase conserved C-terminal domain|Superfamilies 1 and 2 helicase C-terminal domain profile.	Phypoly-transcript-00248	0.042	SM1
Phypoly-transcript-02992	1.0496e-41	1.14075	0.98	0.76	1.58699e-37	0	noGene	GO:0003676|GO:0003676	Eukaryotic RNA Recognition Motif (RRM) profile.|RNA recognition motif. (a.k.a. RRM, RBD, or RNP domain)	Phypoly-transcript-02992	0.22	SM1
Phypoly-transcript-00164	3.46191e-49	1.1391	0.985	0.91	5.2344e-45	0	ALKB_ECOLI	GO:0005515	1382	Phypoly-transcript-00164	0.075	SM1
Phypoly-transcript-12146	2.57078e-43	1.1383	0.964	0.682	3.88702e-39	0	GRHPR_HUMAN	GO:0016616|GO:0048037|GO:0055114|GO:0008152|GO:0016616|GO:0051287|GO:0055114|GO:0016616|GO:0048037|GO:0055114|GO:0016616|GO:0048037|GO:0055114	D-isomer specific 2-hydroxyacid dehydrogenases signature 3.|D-isomer specific 2-hydroxyacid dehydrogenase, catalytic domain|D-isomer specific 2-hydroxyacid dehydrogenase, NAD binding domain|D-isomer specific 2-hydroxyacid dehydrogenases signature 2.	Phypoly-transcript-12146	0.282	SM1
Phypoly-transcript-08888	2.66324e-43	1.13761	0.964	0.87	4.02682e-39	0	PPA16_ARATH	GO:0008654|GO:0016020|GO:0016780|GO:0008654|GO:0016020|GO:0016780	CDP-alcohol phosphatidyltransferases signature.|CDP-alcohol phosphatidyltransferase	Phypoly-transcript-08888	0.094	SM1
Phypoly-transcript-13036	5.83461e-41	1.1373	0.975	0.734	8.82193e-37	0	ELAV2_PONAB	GO:0003676|GO:0003676	Eukaryotic RNA Recognition Motif (RRM) profile.|RNA recognition motif. (a.k.a. RRM, RBD, or RNP domain)	Phypoly-transcript-13036	0.241	SM1
Phypoly-transcript-27971	8.89641e-34	1.13664	0.939	0.685	1.34514e-29	0	XLNR_EMENI	GO:0000981|GO:0005634|GO:0006355|GO:0008270|GO:0000981|GO:0005634|GO:0006355|GO:0008270	Zn(2)-C6 fungal-type DNA-binding domain profile.|Fungal Zn(2)-Cys(6) binuclear cluster domain	Phypoly-transcript-27971	0.254	SM1
Phypoly-transcript-12722	3.01598e-40	1.13467	0.964	0.757	4.56016e-36	0	Y1225_METJA	GO:0030554|GO:0030554	CBS domain profile.|CBS domain	Phypoly-transcript-12722	0.207	SM1
Phypoly-transcript-20383	1.74122e-28	1.13115	0.883	0.555	2.63272e-24	0	DUS23_MOUSE	GO:0016311|GO:0016791|GO:0004725|GO:0016311|GO:0016791|GO:0006470|GO:0008138	Tyrosine specific protein phosphatases family profile.|Tyrosine specific protein phosphatases active site.|Dual specificity phosphatase, catalytic domain	Phypoly-transcript-20383	0.328	SM1
Phypoly-transcript-02409	5.13049e-35	1.13074	0.909	0.581	7.75731e-31	0	DNLI_HAEIN	GO:0003910|GO:0005524|GO:0006281|GO:0006310|GO:0003909|GO:0051103	ATP dependent DNA ligase domain|ATP-dependent DNA ligase signature 2.	Phypoly-transcript-02409	0.328	SM1
Phypoly-transcript-20629	2.14474e-42	1.13066	0.97	0.725	3.24285e-38	0	C516B_DICDI	GO:0016705|GO:0055114|GO:0005506|GO:0016705|GO:0020037|GO:0055114	Cytochrome P450 cysteine heme-iron ligand signature.|Cytochrome P450	Phypoly-transcript-20629	0.245	SM1
Phypoly-transcript-11817	5.61048e-28	1.12851	0.914	0.671	8.48304e-24	0	MED6_DICDI	GO:0001104|GO:0006357|GO:0016592	2437	Phypoly-transcript-11817	0.243	SM1
Phypoly-transcript-06495	2.68628e-37	1.1281	0.929	0.601	4.06166e-33	0	PTR36_ARATH	GO:0016021|GO:0055085	2392	Phypoly-transcript-06495	0.328	SM1
Phypoly-transcript-04309	4.15285e-38	1.12792	0.939	0.613	6.2791e-34	0	DNLI_HAEIN	GO:0003910|GO:0005524|GO:0006281|GO:0006310|GO:0003909|GO:0051103	ATP dependent DNA ligase domain|ATP-dependent DNA ligase signature 2.	Phypoly-transcript-04309	0.326	SM1
Phypoly-transcript-14212	3.96841e-35	1.12737	0.949	0.688	6.00024e-31	0	STX8B_DICDI	GO:0005515|GO:0005515	t-SNARE coiled-coil homology domain profile.|SNARE domain	Phypoly-transcript-14212	0.261	SM1
Phypoly-transcript-12591	1.7021e-31	1.12703	0.964	0.821	2.57358e-27	0	URIC_DICDI	GO:0004846|GO:0006144|GO:0055114	4787	Phypoly-transcript-12591	0.143	SM1
Phypoly-transcript-08717	2.59427e-35	1.12568	0.949	0.697	3.92254e-31	0	ACDB_BACSU	GO:0003995|GO:0055114|GO:0008152|GO:0016627|GO:0050660|GO:0055114|GO:0016627|GO:0055114	Acyl-CoA dehydrogenase, middle domain|Acyl-CoA dehydrogenase, N-terminal domain|Acyl-CoA dehydrogenase, C-terminal domain	Phypoly-transcript-08717	0.252	SM1
Phypoly-transcript-10501	3.81627e-44	1.12524	0.939	0.584	5.77021e-40	0	DNLI_HAEIN	GO:0003910|GO:0005524|GO:0006281|GO:0006310|GO:0003910|GO:0005524|GO:0006281|GO:0006310	ATP dependent DNA ligase domain|ATP-dependent DNA ligase family profile.	Phypoly-transcript-10501	0.355	SM1
Phypoly-transcript-05766	4.23355e-19	1.12469	0.716	0.332	6.40113e-15	0	YD156_PHANO	GO:0005515	4874	Phypoly-transcript-05766	0.384	SM1
Phypoly-transcript-05167	1.53295e-38	1.12386	0.975	0.76	2.31782e-34	0	SENP1_HUMAN	GO:0006508|GO:0008234|GO:0006508|GO:0008234	Ubiquitin-like protease family profile.|Ulp1 protease family, C-terminal catalytic domain	Phypoly-transcript-05167	0.215	SM1
Phypoly-transcript-14851	3.82187e-29	1.12373	0.914	0.584	5.77866e-25	0	KCTD7_DANRE	GO:0005515|GO:0051260	BTB domain profile.|BTB/POZ domain	Phypoly-transcript-14851	0.33	SM1
Phypoly-transcript-00593	1.03103e-42	1.12203	0.975	0.867	1.55892e-38	0	MYOF_XENTR	GO:0005515|GO:0005515	C2 domain profile.|C2 domain	Phypoly-transcript-00593	0.108	SM1
Phypoly-transcript-24937	1.87718e-18	1.12108	0.33	0.049	2.83829e-14	0	Y8013_DICDI	GO:0004672|GO:0005524|GO:0006468|GO:0004672|GO:0005524|GO:0006468	Protein kinase domain|Protein kinase domain profile.	Phypoly-transcript-24937	0.281	SM1
Phypoly-transcript-02017	1.11883e-37	1.11918	0.924	0.532	1.69167e-33	0	DNLI_HAEIN	GO:0003910|GO:0005524|GO:0006281|GO:0006310|GO:0003909|GO:0051103	ATP dependent DNA ligase domain|ATP-dependent DNA ligase signature 2.	Phypoly-transcript-02017	0.392	SM1
Phypoly-transcript-07907	4.27255e-47	1.11901	0.97	0.754	6.46009e-43	0	IDHP_PIG	GO:0016616|GO:0055114|GO:0000287|GO:0016616|GO:0051287|GO:0055114	Isocitrate/isopropylmalate dehydrogenase|Isocitrate and isopropylmalate dehydrogenases signature.	Phypoly-transcript-07907	0.216	SM1
Phypoly-transcript-10025	2.86455e-34	1.11744	0.954	0.749	4.3312e-30	0	noGene	GO:0006950|GO:0005515|GO:0005515|GO:0008270	TerD domain|Ubiquitin domain profile.|Zinc finger RING-type profile.	Phypoly-transcript-10025	0.205	SM1
Phypoly-transcript-06457	1.46093e-36	1.11735	0.954	0.653	2.20892e-32	0	PIGT_HUMAN	GO:0016255|GO:0042765	1936	Phypoly-transcript-06457	0.301	SM1
Phypoly-transcript-19711	3.2476e-32	1.11644	0.949	0.679	4.91037e-28	0	GCVR_SHIFL	GO:0008152|GO:0016597	117	Phypoly-transcript-19711	0.27	SM1
Phypoly-transcript-00546	1.14603e-37	1.11457	0.975	0.855	1.7328e-33	0	NU133_MOUSE	GO:0016787|GO:0016787	NUDIX domain|Nudix hydrolase domain profile.	Phypoly-transcript-00546	0.12	SM1
Phypoly-transcript-01936	3.37077e-33	1.11153	0.893	0.5	5.09661e-29	0	DNLI_HAEIN	GO:0003909|GO:0051103|GO:0003910|GO:0005524|GO:0006281|GO:0006310	ATP-dependent DNA ligase signature 2.|ATP dependent DNA ligase domain	Phypoly-transcript-01936	0.393	SM1
Phypoly-transcript-16444	1.75459e-21	1.11079	0.65	0.263	2.65294e-17	0	RASW_DICDI	GO:0003924|GO:0005525|GO:0006184|GO:0007165|GO:0016020|GO:0005525|GO:0007264	small GTPase Ras family profile.|Ras family	Phypoly-transcript-16444	0.387	SM1
Phypoly-transcript-00150	1.03554e-41	1.1085	0.98	0.855	1.56574e-37	0	PARP4_HUMAN	GO:0003950|GO:0003950|GO:0003950|GO:0006471|GO:0003950|GO:0006471	PARP catalytic domain profile.|Poly(ADP-ribose) polymerase catalytic domain|Poly(ADP-ribose) polymerase, regulatory domain|PARP alpha-helical domain profile.	Phypoly-transcript-00150	0.125	SM1
Phypoly-transcript-04569	3.52582e-35	1.10818	0.98	0.783	5.33104e-31	0	ACBP4_ARATH	GO:0051260	553	Phypoly-transcript-04569	0.197	SM1
Phypoly-transcript-05669	3.6131e-39	1.10195	0.883	0.454	5.46301e-35	0	CDC48_ENCCU	GO:0005524|GO:0005524	AAA-protein family signature.|ATPase family associated with various cellular activities (AAA)	Phypoly-transcript-05669	0.429	SM1
Phypoly-transcript-06508	2.64998e-56	1.10172	0.995	0.824	4.00677e-52	0	TBC8B_DANRE	GO:0005622|GO:0008270|GO:0005622|GO:0008270|GO:0005097|GO:0032313|GO:0005097|GO:0032313	B-box zinc finger|Zinc finger B-box type profile.|TBC/rab GAP domain profile.|Rab-GTPase-TBC domain	Phypoly-transcript-06508	0.171	SM1
Phypoly-transcript-18448	5.63903e-18	1.10024	0.797	0.488	8.52621e-14	0	RAB1B_DICDI	GO:0005525|GO:0007264	3588	Phypoly-transcript-18448	0.309	SM1
Phypoly-transcript-04373	3.31357e-40	1.09738	0.934	0.526	5.01012e-36	0	SPXS5_DICDI	GO:0016021|GO:0016021	EXS family|EXS domain profile.	Phypoly-transcript-04373	0.408	SM1
Phypoly-transcript-10103	8.56416e-36	1.09723	0.939	0.645	1.2949e-31	0	CADH3_ARATH	GO:0008270|GO:0016491|GO:0055114	5000	Phypoly-transcript-10103	0.294	SM1
Phypoly-transcript-04160	2.3497e-32	1.09599	0.924	0.63	3.55274e-28	0	MAL13_YEAST	GO:0000981|GO:0005634|GO:0006355|GO:0008270|GO:0000981|GO:0005634|GO:0006355|GO:0008270|GO:0000981|GO:0005634|GO:0006355|GO:0008270	Zn(2)-C6 fungal-type DNA-binding domain profile.|Fungal Zn(2)-Cys(6) binuclear cluster domain|Zn(2)-C6 fungal-type DNA-binding domain signature.	Phypoly-transcript-04160	0.294	SM1
Phypoly-transcript-08939	3.5505e-42	1.09569	0.975	0.853	5.36836e-38	0	LIS1_POLPA	GO:0005515|GO:0005515|GO:0005515|GO:0005515	Trp-Asp (WD) repeats profile.|WD domain, G-beta repeat|Trp-Asp (WD) repeats circular profile.|LIS1 homology (LisH) motif profile.	Phypoly-transcript-08939	0.122	SM1
Phypoly-transcript-21631	3.2531e-19	1.09558	0.685	0.347	4.91868e-15	0	YIDE_SCHPO	GO:0005524|GO:0008152|GO:0016301	3073	Phypoly-transcript-21631	0.338	SM1
Phypoly-transcript-12390	4.63879e-36	1.09518	0.964	0.688	7.01385e-32	0	LYPA2_HUMAN	GO:0016787	3056	Phypoly-transcript-12390	0.276	SM1
Phypoly-transcript-07004	8.6036e-40	1.09116	0.98	0.864	1.30087e-35	0	TUB4_AGRVI	GO:0016021|GO:0055085	2392	Phypoly-transcript-07004	0.116	SM1
Phypoly-transcript-11841	2.50758e-41	1.09113	0.873	0.324	3.79146e-37	0	noGene	GO:0016491|GO:0016706|GO:0055114	1580	Phypoly-transcript-11841	0.549	SM1
Phypoly-transcript-29502	5.31716e-34	1.08997	0.924	0.621	8.03955e-30	0	noGene	GO:0005525|GO:0007264	3588	Phypoly-transcript-29502	0.303	SM1
Phypoly-transcript-09929	7.10068e-42	1.08914	0.98	0.821	1.07362e-37	0	YDG7_SCHPO	GO:0016491|GO:0055114|GO:0016491|GO:0055114	Aldo/keto reductase family signature 1.|Aldo/keto reductase family signature 2.	Phypoly-transcript-09929	0.159	SM1
Phypoly-transcript-07998	1.60539e-37	1.08859	0.964	0.743	2.42735e-33	0	IOD3_HUMAN	GO:0004800|GO:0055114	2218	Phypoly-transcript-07998	0.221	SM1
Phypoly-transcript-03944	3.76216e-35	1.08828	0.98	0.815	5.68839e-31	0	TBC13_MOUSE	GO:0005097|GO:0032313|GO:0005097|GO:0032313	Rab-GTPase-TBC domain|TBC/rab GAP domain profile.	Phypoly-transcript-03944	0.165	SM1
Phypoly-transcript-09995	1.68295e-31	1.08719	0.761	0.312	2.54462e-27	0	LRC23_XENTR	GO:0005515	2337	Phypoly-transcript-09995	0.449	SM1
Phypoly-transcript-16780	2.9095e-40	1.08641	0.975	0.806	4.39916e-36	0	RAC1A_DICDI	GO:0005525|GO:0005622|GO:0007264|GO:0005525|GO:0007264	small GTPase Rho family profile.|Ras family	Phypoly-transcript-16780	0.169	SM1
Phypoly-transcript-08076	6.97912e-36	1.08583	0.949	0.699	1.05524e-31	0	AMPX_VIBPR	GO:0006508|GO:0008233	2940	Phypoly-transcript-08076	0.25	SM1
Phypoly-transcript-06094	8.30027e-39	1.08529	0.975	0.835	1.255e-34	0	SHKD_DICDI	GO:0004672|GO:0006468|GO:0004672|GO:0005524|GO:0006468|GO:0004674|GO:0006468|GO:0005515|GO:0005515|GO:0005524	Protein tyrosine kinase|Protein kinase domain profile.|Serine/Threonine protein kinases active-site signature.|Src homology 2 (SH2) domain profile.|SH2 domain|Protein kinases ATP-binding region signature.	Phypoly-transcript-06094	0.14	SM1
Phypoly-transcript-13050	2.5772e-24	1.08426	0.802	0.428	3.89672e-20	0	noGene	GO:0003676|GO:0003676	Eukaryotic RNA Recognition Motif (RRM) profile.|RNA recognition motif. (a.k.a. RRM, RBD, or RNP domain)	Phypoly-transcript-13050	0.374	SM1
Phypoly-transcript-00078	1.63707e-44	1.08408	0.99	0.968	2.47525e-40	0	UPL3_ARATH	GO:0004842|GO:0004842	HECT domain profile.|HECT-domain (ubiquitin-transferase)	Phypoly-transcript-00078	0.022	SM1
Phypoly-transcript-18201	5.00015e-45	1.08116	0.97	0.697	7.56023e-41	0	RL7_MOOTA	GO:0003735|GO:0005622|GO:0005840|GO:0006412	3780	Phypoly-transcript-18201	0.273	SM1
Phypoly-transcript-04866	8.85749e-35	1.08083	0.985	0.853	1.33925e-30	0	GCKR_XENLA	GO:0005975|GO:0030246	4135	Phypoly-transcript-04866	0.132	SM1
Phypoly-transcript-04132	5.45856e-39	1.08048	0.97	0.829	8.25334e-35	0	NDRD_DICDI	GO:0005524|GO:0004672|GO:0005524|GO:0006468|GO:0004672|GO:0005524|GO:0006468|GO:0004674|GO:0006468|GO:0004674|GO:0005524|GO:0006468	Protein kinases ATP-binding region signature.|Protein kinase domain|Protein kinase domain profile.|Serine/Threonine protein kinases active-site signature.|AGC-kinase C-terminal domain profile.	Phypoly-transcript-04132	0.141	SM1
Phypoly-transcript-17982	3.08196e-44	1.0787	0.98	0.789	4.65992e-40	0	noGene	GO:0005681|GO:0008380	3453	Phypoly-transcript-17982	0.191	SM1
Phypoly-transcript-03565	3.59313e-39	1.0772	0.98	0.916	5.43281e-35	0	CCI1_ARATH	GO:0008080|GO:0008080	Gcn5-related N-acetyltransferase (GNAT) domain profile.|Acetyltransferase (GNAT) family	Phypoly-transcript-03565	0.064	SM1
Phypoly-transcript-10868	1.10485e-29	1.07533	0.919	0.636	1.67054e-25	0	ATG5_BOVIN	GO:0005737|GO:0006914	432	Phypoly-transcript-10868	0.283	SM1
Phypoly-transcript-04907	1.20422e-31	1.07212	0.959	0.743	1.82077e-27	0	RPGP2_HUMAN	GO:0005096|GO:0051056|GO:0005096|GO:0051056	Rap/ran-GAP|Rap GTPase activating proteins domain profile.	Phypoly-transcript-04907	0.216	SM1
Phypoly-transcript-23979	1.38799e-31	1.07148	0.934	0.647	2.09863e-27	0	ZMAT5_MOUSE	GO:0046872|GO:0008270|GO:0046872	Zinc finger C3H1-type profile.|U1 zinc finger|Zinc finger C-x8-C-x5-C-x3-H type (and similar)	Phypoly-transcript-23979	0.287	SM1
Phypoly-transcript-02087	5.78425e-40	1.0708	0.949	0.564	8.74579e-36	0	P2R3A_HUMAN	GO:0004553|GO:0005576|GO:0005975|GO:0030248	1691	Phypoly-transcript-02087	0.385	SM1
Phypoly-transcript-18620	5.89987e-26	1.07037	0.924	0.662	8.9206e-22	0	GSTK1_HUMAN	GO:0015035	1322	Phypoly-transcript-18620	0.262	SM1
Phypoly-transcript-11175	2.39327e-31	1.07027	0.944	0.636	3.61862e-27	0	RBM23_HUMAN	GO:0003676	1497	Phypoly-transcript-11175	0.308	SM1
Phypoly-transcript-07137	1.42469e-34	1.06816	0.959	0.728	2.15413e-30	0	ARI3B_HUMAN	GO:0003677|GO:0005622|GO:0003677|GO:0005622	ARID domain profile.|ARID/BRIGHT DNA binding domain	Phypoly-transcript-07137	0.231	SM1
Phypoly-transcript-03399	6.79513e-33	1.06661	0.929	0.61	1.02742e-28	0	DLPC_DICDI	GO:0003924|GO:0005525	1342	Phypoly-transcript-03399	0.319	SM1
Phypoly-transcript-05045	4.77185e-40	1.06543	0.98	0.786	7.21504e-36	0	TRI23_MOUSE	GO:0046872|GO:0005622|GO:0008270|GO:0005622|GO:0008270|GO:0005515|GO:0008270	Zinc finger, C3HC4 type (RING finger)|Zinc finger B-box type profile.|B-box zinc finger|Zinc finger RING-type profile.	Phypoly-transcript-05045	0.194	SM1
Phypoly-transcript-06816	3.19802e-35	1.06454	0.97	0.754	4.83541e-31	0	DMAP1_HUMAN	GO:0005634|GO:0045892	1115	Phypoly-transcript-06816	0.216	SM1
Phypoly-transcript-18625	1.41263e-39	1.06323	0.919	0.457	2.13589e-35	0	DSK1_CYLFU	GO:0003777|GO:0005524|GO:0007018|GO:0008017|GO:0003777|GO:0005524|GO:0007018|GO:0008017	Kinesin motor domain|Kinesin motor domain profile.	Phypoly-transcript-18625	0.462	SM1
Phypoly-transcript-09573	1.82029e-38	1.06304	0.975	0.783	2.75227e-34	0	STAR_DANRE	GO:0008289|GO:0008289	START domain|START domain profile.	Phypoly-transcript-09573	0.192	SM1
Phypoly-transcript-30952	2.38611e-43	1.06215	0.97	0.699	3.6078e-39	0	TM14C_HUMAN	GO:0016020	4539	Phypoly-transcript-30952	0.271	SM1
Phypoly-transcript-10361	5.65785e-30	1.06186	0.909	0.592	8.55467e-26	0	TFB1M_VERVE	GO:0000154|GO:0000179|GO:0008649|GO:0000154|GO:0000179|GO:0008649	Ribosomal RNA adenine dimethylase|Ribosomal RNA adenine dimethylases signature.	Phypoly-transcript-10361	0.317	SM1
Phypoly-transcript-06715	6.10773e-40	1.06186	0.964	0.864	9.23489e-36	0	IMDH_DICDI	GO:0030554|GO:0003824|GO:0055114|GO:0030554|GO:0016491|GO:0055114	CBS domain profile.|IMP dehydrogenase / GMP reductase domain|CBS domain|IMP dehydrogenase / GMP reductase signature.	Phypoly-transcript-06715	0.1	SM1
Phypoly-transcript-16379	2.66482e-34	1.0617	0.949	0.697	4.0292e-30	0	MTCA2_MYCTU	GO:0004089|GO:0008270	636	Phypoly-transcript-16379	0.252	SM1
Phypoly-transcript-24097	1.52507e-16	1.06146	0.437	0.139	2.3059e-12	0	NOXA_DICDI	GO:0016491|GO:0055114	1591	Phypoly-transcript-24097	0.298	SM1
Phypoly-transcript-15332	1.70637e-42	1.06119	0.97	0.754	2.58003e-38	0	STX2_HUMAN	GO:0005515|GO:0016020|GO:0005515	t-SNARE coiled-coil homology domain profile.|Syntaxin|SNARE domain	Phypoly-transcript-15332	0.216	SM1
Phypoly-transcript-11924	8.84915e-46	1.06105	0.975	0.766	1.33799e-41	0	CYB52_SCHPO	GO:0043231|GO:0051537|GO:0020037|GO:0020037|GO:0020037	Iron-binding zinc finger CDGSH type|Cytochrome b5 family, heme-binding domain signature.|Cytochrome b5-like Heme/Steroid binding domain|Cytochrome b5 family, heme-binding domain profile.	Phypoly-transcript-11924	0.209	SM1
Phypoly-transcript-08449	9.08778e-43	1.05915	0.975	0.864	1.37407e-38	0	GCN2_ARATH	GO:0005524|GO:0004672|GO:0005524|GO:0006468|GO:0004672|GO:0005524|GO:0006468	Protein kinases ATP-binding region signature.|Protein kinase domain profile.|Protein kinase domain	Phypoly-transcript-08449	0.111	SM1
Phypoly-transcript-12571	1.01212e-34	1.05828	0.975	0.829	1.53033e-30	0	OGFR_MOUSE	GO:0009058|GO:0016740	4227	Phypoly-transcript-12571	0.146	SM1
Phypoly-transcript-27313	4.4356e-35	1.058	0.99	0.853	6.70663e-31	0	CDK5_DICDI	GO:0004672|GO:0005524|GO:0006468|GO:0004672|GO:0005524|GO:0006468|GO:0005524|GO:0004674|GO:0006468	Protein kinase domain|Protein kinase domain profile.|Protein kinases ATP-binding region signature.|Serine/Threonine protein kinases active-site signature.	Phypoly-transcript-27313	0.137	SM1
Phypoly-transcript-03656	2.69732e-41	1.05728	0.944	0.488	4.07835e-37	0	KMT2C_MOUSE	GO:0005634|GO:0005634|GO:0005634|GO:0005515|GO:0005515|GO:0005634	F/Y rich C-terminus|FYR domain FYRN motif profile.|F/Y-rich N-terminus|SET domain profile.|SET domain|FYR domain FYRC motif profile.	Phypoly-transcript-03656	0.456	SM1
Phypoly-transcript-11039	2.23535e-34	1.05716	0.954	0.783	3.37985e-30	0	AGD13_ARATH	GO:0005515|GO:0005515	C2 domain profile.|C2 domain	Phypoly-transcript-11039	0.171	SM1
Phypoly-transcript-04746	5.09799e-35	1.05642	0.888	0.535	7.70816e-31	0	ACSF4_HUMAN	GO:0003824|GO:0008152	277	Phypoly-transcript-04746	0.353	SM1
Phypoly-transcript-05178	2.6154e-30	1.05613	0.898	0.512	3.95448e-26	0	KCNT2_HUMAN	GO:0006813|GO:0015269|GO:0016020	599	Phypoly-transcript-05178	0.386	SM1
Phypoly-transcript-11238	3.13643e-39	1.05528	0.898	0.428	4.74229e-35	0	DUS2L_MOUSE	GO:0008033|GO:0017150|GO:0050660|GO:0055114|GO:0008033|GO:0017150|GO:0050660|GO:0055114	Dihydrouridine synthase (Dus)|Uncharacterized protein family UPF0034 signature.	Phypoly-transcript-11238	0.47	SM1
Phypoly-transcript-04610	1.10971e-38	1.05471	0.99	0.925	1.67788e-34	0	SYHC_DICDI	GO:0005525	57	Phypoly-transcript-04610	0.065	SM1
Phypoly-transcript-19125	1.15368e-40	1.05341	0.98	0.809	1.74436e-36	0	SM16_SCHMA	GO:0005509|GO:0005509|GO:0005509	EF-hand calcium-binding domain profile.|EF hand|EF-hand domain pair	Phypoly-transcript-19125	0.171	SM1
Phypoly-transcript-16403	6.0482e-28	1.05335	0.822	0.474	9.14488e-24	0	NEK3_DICDI	GO:0004672|GO:0005524|GO:0006468|GO:0004674|GO:0006468|GO:0004672|GO:0005524|GO:0006468	Protein kinase domain profile.|Serine/Threonine protein kinases active-site signature.|Protein kinase domain	Phypoly-transcript-16403	0.348	SM1
Phypoly-transcript-18861	1.1348e-34	1.05319	0.949	0.671	1.71582e-30	0	ARL2_MOUSE	GO:0005525|GO:0005525|GO:0005622|GO:0007264	ADP-ribosylation factor family|small GTPase Arf family profile.	Phypoly-transcript-18861	0.278	SM1
Phypoly-transcript-22307	7.97328e-39	1.05291	0.97	0.777	1.20556e-34	0	Y1101_SYNY3	GO:0006950	4772	Phypoly-transcript-22307	0.193	SM1
Phypoly-transcript-09247	2.11648e-38	1.05266	0.975	0.743	3.20012e-34	0	RL20_EHRRW	GO:0003735|GO:0005622|GO:0005840|GO:0006412|GO:0019843	3746	Phypoly-transcript-09247	0.232	SM1
Phypoly-transcript-21996	1.17189e-17	1.05022	0.777	0.503	1.77191e-13	0	RS30_PLAF7	GO:0003735|GO:0005622|GO:0005840|GO:0006412	3816	Phypoly-transcript-21996	0.274	SM1
Phypoly-transcript-03367	5.97849e-36	1.04882	0.985	0.775	9.03948e-32	0	ACSM3_RAT	GO:0003824|GO:0008152	277	Phypoly-transcript-03367	0.21	SM1
Phypoly-transcript-02166	1.29396e-35	1.04809	0.975	0.783	1.95646e-31	0	KXCB_DICDI	GO:0004674|GO:0006468|GO:0004672|GO:0005524|GO:0006468|GO:0005524|GO:0004672|GO:0005524|GO:0006468	Serine/Threonine protein kinases active-site signature.|Protein kinase domain|Protein kinases ATP-binding region signature.|Protein kinase domain profile.	Phypoly-transcript-02166	0.192	SM1
Phypoly-transcript-05130	3.22761e-36	1.04653	0.954	0.78	4.88015e-32	0	FOL1_DICDI	GO:0003848|GO:0009396|GO:0042558|GO:0003848|GO:0009396|GO:0004150|GO:0006760|GO:0042558|GO:0042558|GO:0042558	7,8-dihydro-6-hydroxymethylpterin-pyrophosphokinase signature.|Pterin-binding domain profile.|7,8-dihydro-6-hydroxymethylpterin-pyrophosphokinase (HPPK)|Dihydroneopterin aldolase|Dihydropteroate synthase signature 1.|Pterin binding enzyme|Dihydropteroate synthase signature 2.	Phypoly-transcript-05130	0.174	SM1
Phypoly-transcript-19030	5.76339e-33	1.04426	0.934	0.618	8.71425e-29	0	RF298_ARATH	GO:0005515|GO:0008270	4982	Phypoly-transcript-19030	0.316	SM1
Phypoly-transcript-30440	4.41868e-29	1.04389	0.954	0.72	6.68105e-25	0	noGene	GO:0046872	4959	Phypoly-transcript-30440	0.234	SM1
Phypoly-transcript-03974	7.09499e-40	1.04192	0.99	0.971	1.07276e-35	0	S15A1_RAT	GO:0005215|GO:0006810|GO:0016020|GO:0005215|GO:0006857|GO:0016020	POT family|PTR2 family proton/oligopeptide symporters signature 1.	Phypoly-transcript-03974	0.019	SM1
Phypoly-transcript-13464	6.81561e-32	1.04012	0.944	0.711	1.03052e-27	0	GRPE_DICDI	GO:0000774|GO:0006457|GO:0042803|GO:0051087|GO:0000774|GO:0006457|GO:0042803|GO:0051087	grpE protein signature.|GrpE	Phypoly-transcript-13464	0.233	SM1
Phypoly-transcript-13514	6.84001e-30	1.04012	0.949	0.653	1.03421e-25	0	VTI1A_HUMAN	GO:0006886|GO:0016020	4826	Phypoly-transcript-13514	0.296	SM1
Phypoly-transcript-09331	3.26269e-45	1.03948	0.98	0.841	4.93319e-41	0	GTAI_DICDI	GO:0003700|GO:0006355|GO:0008270|GO:0043565|GO:0003700|GO:0006355|GO:0008270|GO:0043565|GO:0003700|GO:0006355|GO:0008270|GO:0043565	GATA zinc finger|GATA-type zinc finger domain profile.|GATA-type zinc finger domain.	Phypoly-transcript-09331	0.139	SM1
Phypoly-transcript-02452	3.00988e-38	1.03915	0.97	0.841	4.55094e-34	0	EXOC3_DICDI	GO:0000145|GO:0006887	1514	Phypoly-transcript-02452	0.129	SM1
Phypoly-transcript-00805	3.10987e-36	1.03908	0.954	0.757	4.70213e-32	0	CCR4E_ARATH	GO:0003910|GO:0005524|GO:0006281|GO:0006310	383	Phypoly-transcript-00805	0.197	SM1
Phypoly-transcript-04013	6.20388e-31	1.03907	0.914	0.714	9.38027e-27	0	DNLI_HAEIN	GO:0003910|GO:0005524|GO:0006281|GO:0006310	383	Phypoly-transcript-04013	0.2	SM1
Phypoly-transcript-12157	1.44616e-32	1.0379	0.964	0.723	2.18659e-28	0	MED4_DICDI	GO:0001104|GO:0006357|GO:0016592	4839	Phypoly-transcript-12157	0.241	SM1
Phypoly-transcript-01531	5.28984e-38	1.03754	0.985	0.835	7.99824e-34	0	XPO1_HUMAN	GO:0006886|GO:0008536|GO:0006886|GO:0008536	Importin-beta N-terminal domain|Importin-beta N-terminal domain profile.	Phypoly-transcript-01531	0.15	SM1
Phypoly-transcript-06950	1.67945e-32	1.03581	0.959	0.74	2.53933e-28	0	FBX21_PONAB	GO:0005515|GO:0003677	F-box domain profile.|Hemimethylated DNA-binding protein YccV like	Phypoly-transcript-06950	0.219	SM1
Phypoly-transcript-01365	8.51876e-39	1.03557	0.995	0.902	1.28804e-34	0	CCD1_ONCHC	GO:0003924|GO:0005525	1972	Phypoly-transcript-01365	0.093	SM1
Phypoly-transcript-17278	3.09675e-37	1.03525	0.964	0.711	4.68228e-33	0	RU2B_HUMAN	GO:0003676|GO:0003676	RNA recognition motif. (a.k.a. RRM, RBD, or RNP domain)|Eukaryotic RNA Recognition Motif (RRM) profile.	Phypoly-transcript-17278	0.253	SM1
Phypoly-transcript-11406	5.65578e-21	1.03353	0.726	0.379	8.55153e-17	0	LRRK2_MOUSE	GO:0005525|GO:0007264	3588	Phypoly-transcript-11406	0.347	SM1
Phypoly-transcript-00704	2.78785e-41	1.03324	0.98	0.899	4.21523e-37	0	NCPR_CAVPO	GO:0016491|GO:0055114|GO:0010181|GO:0016491|GO:0016491|GO:0055114|GO:0010181|GO:0016491|GO:0016491|GO:0055114	Ferredoxin reductase-type FAD binding domain profile.|Flavodoxin-like domain profile.|FAD binding domain|Flavodoxin|Oxidoreductase NAD-binding domain	Phypoly-transcript-00704	0.081	SM1
Phypoly-transcript-11796	6.74457e-36	1.03248	0.97	0.769	1.01978e-31	0	noGene	GO:0016021	1921	Phypoly-transcript-11796	0.201	SM1
Phypoly-transcript-01739	1.22777e-29	1.03197	0.929	0.717	1.85638e-25	0	NAPEP_HUMAN	GO:0005515|GO:0005515	Forkhead-associated (FHA) domain profile.|FHA domain	Phypoly-transcript-01739	0.212	SM1
Phypoly-transcript-16383	1.36848e-32	1.02969	0.964	0.783	2.06915e-28	0	CALM4_MOUSE	GO:0005509|GO:0005509	EF-hand calcium-binding domain profile.|EF-hand domain pair	Phypoly-transcript-16383	0.181	SM1
Phypoly-transcript-21165	1.69204e-23	1.02943	0.721	0.35	2.55836e-19	0	DUS6_BOVIN	GO:0016311|GO:0016791|GO:0006470|GO:0008138|GO:0006470|GO:0008138|GO:0004725|GO:0016311|GO:0016791	Tyrosine specific protein phosphatases family profile.|Dual specificity protein phosphatase family profile.|Dual specificity phosphatase, catalytic domain|Tyrosine specific protein phosphatases active site.	Phypoly-transcript-21165	0.371	SM1
Phypoly-transcript-13694	1.8971e-18	1.02806	0.711	0.399	2.86841e-14	0	RL22_RHORT	GO:0003735|GO:0005840|GO:0006412|GO:0003735|GO:0005622|GO:0005840|GO:0006412	Ribosomal protein L22p/L17e|Ribosomal protein L22 signature.	Phypoly-transcript-13694	0.312	SM1
Phypoly-transcript-09413	7.78342e-33	1.02767	0.964	0.772	1.17685e-28	0	MGT4B_DANRE	GO:0005975|GO:0016020|GO:0016758	2628	Phypoly-transcript-09413	0.192	SM1
Phypoly-transcript-25424	2.44541e-11	1.02694	0.462	0.211	3.69746e-07	0	EFCB2_MOUSE	GO:0005509	1376	Phypoly-transcript-25424	0.251	SM1
Phypoly-transcript-13647	1.77235e-34	1.02641	0.959	0.653	2.6798e-30	0	STX16_HUMAN	GO:0005515|GO:0016020|GO:0005484|GO:0006886|GO:0016020|GO:0005515	SNARE domain|Syntaxin|Syntaxin / epimorphin family signature.|t-SNARE coiled-coil homology domain profile.	Phypoly-transcript-13647	0.306	SM1
Phypoly-transcript-15324	1.03281e-32	1.02575	0.954	0.679	1.56161e-28	0	noGene	GO:0003712|GO:0006355	2285	Phypoly-transcript-15324	0.275	SM1
Phypoly-transcript-05231	3.5785e-34	1.02569	0.934	0.662	5.4107e-30	0	noGene	GO:0008270	4989	Phypoly-transcript-05231	0.272	SM1
Phypoly-transcript-08962	4.91072e-34	1.02498	0.944	0.65	7.425e-30	0	RAN_CAEEL	GO:0005525|GO:0007264	3588	Phypoly-transcript-08962	0.294	SM1
Phypoly-transcript-16239	6.85554e-21	1.02497	0.746	0.382	1.03656e-16	0	RIPK4_MOUSE	GO:0005515	295	Phypoly-transcript-16239	0.364	SM1
Phypoly-transcript-03039	8.28094e-40	1.02441	0.985	0.882	1.25208e-35	0	GACC_DICDI	GO:0016757	1894	Phypoly-transcript-03039	0.103	SM1
Phypoly-transcript-03121	2.78925e-31	1.02409	0.934	0.725	4.21734e-27	0	noGene	GO:0003676|GO:0003676|GO:0003676|GO:0003676	R3H domain profile.|R3H domain|G-patch domain profile.|G-patch domain	Phypoly-transcript-03121	0.209	SM1
Phypoly-transcript-28614	2.60027e-12	1.02288	0.477	0.214	3.93161e-08	0	BGLD_ASPNC	GO:0004553|GO:0005975	1843	Phypoly-transcript-28614	0.263	SM1
Phypoly-transcript-15389	1.47741e-25	1.02204	0.751	0.341	2.23385e-21	0	NADD_STAES	GO:0003824|GO:0009058	947	Phypoly-transcript-15389	0.41	SM1
Phypoly-transcript-02109	9.27246e-35	1.02118	0.949	0.789	1.402e-30	0	FH20_ARATH	GO:0003779|GO:0016043|GO:0003779|GO:0017048|GO:0030036	Diaphanous FH3 Domain|Diaphanous GTPase-binding Domain	Phypoly-transcript-02109	0.16	SM1
Phypoly-transcript-06845	3.40102e-36	1.02107	0.964	0.882	5.14235e-32	0	EXD2_HUMAN	GO:0003676|GO:0006139|GO:0008408	39	Phypoly-transcript-06845	0.082	SM1
Phypoly-transcript-10138	8.85958e-43	1.01987	0.99	0.873	1.33957e-38	0	PRP18_DANRE	GO:0005681|GO:0008380	3453	Phypoly-transcript-10138	0.117	SM1
Phypoly-transcript-11008	1.15718e-30	1.01942	0.949	0.72	1.74965e-26	0	GSTP_ONCVO	GO:0005515|GO:0005515	Glutathione S-transferase, N-terminal domain|Soluble glutathione S-transferase N-terminal domain profile.	Phypoly-transcript-11008	0.229	SM1
Phypoly-transcript-07442	1.39811e-38	1.01882	0.98	0.821	2.11394e-34	0	DUSPR_DICDI	GO:0006470|GO:0008138|GO:0004725|GO:0016311|GO:0016791|GO:0006470|GO:0008138|GO:0016311|GO:0016791	Dual specificity phosphatase, catalytic domain|Tyrosine specific protein phosphatases active site.|Dual specificity protein phosphatase family profile.|Tyrosine specific protein phosphatases family profile.	Phypoly-transcript-07442	0.159	SM1
Phypoly-transcript-07136	2.41614e-32	1.0186	0.964	0.763	3.6532e-28	0	noGene	GO:0016021	2372	Phypoly-transcript-07136	0.201	SM1
Phypoly-transcript-08996	4.10683e-28	1.01824	0.843	0.477	6.20953e-24	0	ATXR2_ARATH	GO:0005515|GO:0005515	SET domain|SET domain profile.	Phypoly-transcript-08996	0.366	SM1
Phypoly-transcript-02375	0.00063454	1.01782	1	0.991	1	0	ACDA_BACSU	GO:0003995|GO:0055114|GO:0016627|GO:0055114|GO:0008152|GO:0016627|GO:0050660|GO:0055114|GO:0020037|GO:0003995|GO:0055114|GO:0020037|GO:0020037	Acyl-CoA dehydrogenases signature 1.|Acyl-CoA dehydrogenase, C-terminal domain|Acyl-CoA dehydrogenase, N-terminal domain|Cytochrome b5 family, heme-binding domain signature.|Acyl-CoA dehydrogenase, middle domain|Cytochrome b5-like Heme/Steroid binding domain|Cytochrome b5 family, heme-binding domain profile.	Phypoly-transcript-02375	0.009	SM1
Phypoly-transcript-06432	4.29107e-32	1.01745	0.954	0.659	6.48809e-28	0	DJ1B_ARATH	GO:0001104|GO:0006357|GO:0016592	2436	Phypoly-transcript-06432	0.295	SM1
Phypoly-transcript-07606	1.52505e-32	1.01732	0.959	0.743	2.30588e-28	0	RS5_IDILO	GO:0003723|GO:0003735|GO:0005840|GO:0006412|GO:0003723|GO:0003735|GO:0005840|GO:0006412	Ribosomal protein S5, N-terminal domain|S5 double stranded RNA-binding domain profile.	Phypoly-transcript-07606	0.216	SM1
Phypoly-transcript-05222	2.98111e-33	1.01707	0.964	0.798	4.50744e-29	0	TRAF7_HUMAN	GO:0005515|GO:0005515|GO:0005515	Trp-Asp (WD) repeats profile.|Trp-Asp (WD) repeats circular profile.|WD domain, G-beta repeat	Phypoly-transcript-05222	0.166	SM1
Phypoly-transcript-00986	1.4792e-30	1.01629	0.98	0.962	2.23655e-26	0	PUM12_ARATH	GO:0003723|GO:0046872|GO:0003723|GO:0003723|GO:0046872	Pumilio RNA-binding repeat profile.|Zinc finger C-x8-C-x5-C-x3-H type (and similar)|Pumilio-family RNA binding repeat|Pumilio homology domain (PUM-HD) profile.|Zinc finger C3H1-type profile.	Phypoly-transcript-00986	0.018	SM1
Phypoly-transcript-03231	5.08196e-34	1.01583	0.97	0.835	7.68392e-30	0	PEX5_DICDI	GO:0005515|GO:0005515|GO:0005515	TPR repeat profile.|Tetratricopeptide repeat|TPR repeat region circular profile.	Phypoly-transcript-03231	0.135	SM1
Phypoly-transcript-12205	5.15279e-36	1.01473	0.964	0.775	7.79102e-32	0	noGene	GO:0005515	1532	Phypoly-transcript-12205	0.189	SM1
Phypoly-transcript-07323	2.09017e-34	1.01423	0.975	0.783	3.16034e-30	0	FNBP4_MOUSE	GO:0005515|GO:0005515	WW/rsp5/WWP domain profile.|WW domain	Phypoly-transcript-07323	0.192	SM1
Phypoly-transcript-03090	2.33679e-31	1.01405	0.954	0.705	3.53322e-27	0	noGene	GO:0005515|GO:0005515|GO:0007165	SAM domain profile.|TIR domain	Phypoly-transcript-03090	0.249	SM1
Phypoly-transcript-01208	3.86541e-29	1.01343	0.98	0.861	5.8445e-25	0	STRUM_DICDI	GO:0071203	2047	Phypoly-transcript-01208	0.119	SM1
Phypoly-transcript-07245	1.15892e-31	1.01223	0.954	0.749	1.75229e-27	0	SHKD_DICDI	GO:0004674|GO:0006468|GO:0004672|GO:0006468|GO:0005515|GO:0005524|GO:0005515|GO:0004672|GO:0005524|GO:0006468	Serine/Threonine protein kinases active-site signature.|Protein tyrosine kinase|Src homology 2 (SH2) domain profile.|Protein kinases ATP-binding region signature.|SH2 domain|Protein kinase domain profile.	Phypoly-transcript-07245	0.205	SM1
Phypoly-transcript-10911	8.58552e-27	1.01029	0.878	0.581	1.29813e-22	0	RF2_SHIFL	GO:0003747|GO:0006415|GO:0005737|GO:0006415|GO:0016149|GO:0003747|GO:0006415	RF-1 domain|PCRF domain|Prokaryotic-type class I peptide chain release factors signature.	Phypoly-transcript-10911	0.297	SM1
Phypoly-transcript-22262	8.53171e-12	1.00986	0.599	0.318	1.28999e-07	0	PPSA_STAMF	GO:0005524|GO:0016301|GO:0016310	3541	Phypoly-transcript-22262	0.281	SM1
Phypoly-transcript-10703	4.62906e-39	1.00974	0.975	0.728	6.99914e-35	0	TPIS_TAESO	GO:0004807|GO:0008152|GO:0004807|GO:0008152|GO:0004807	Triosephosphate isomerase|Triosephosphate isomerase (TIM) family profile.|Triosephosphate isomerase active site.	Phypoly-transcript-10703	0.247	SM1
Phypoly-transcript-29219	0.00364416	1.00896	0.127	0.058	1	0	noGene	GO:0046872	4960	Phypoly-transcript-29219	0.069	SM1
Phypoly-transcript-22797	2.1747e-26	1.00783	0.909	0.607	3.28815e-22	0	COAA_DICDI	GO:0003779|GO:0005622	170	Phypoly-transcript-22797	0.302	SM1
Phypoly-transcript-19767	6.97059e-22	1.00736	0.838	0.564	1.05395e-17	0	GSTA_ECOLI	GO:0005515|GO:0005515	Glutathione S-transferase, N-terminal domain|Soluble glutathione S-transferase N-terminal domain profile.	Phypoly-transcript-19767	0.274	SM1
Phypoly-transcript-22220	1.28174e-34	1.00694	0.97	0.861	1.938e-30	0	noGene	GO:0005515|GO:0006351|GO:0006351|GO:0005515	Zinc finger PHD-type profile.|Transcription factor S-II (TFIIS), central domain|TFIIS central domain profile.|PHD-finger	Phypoly-transcript-22220	0.109	SM1
Phypoly-transcript-02463	1.25305e-35	1.00675	0.985	0.801	1.8946e-31	0	WDR5B_MOUSE	GO:0005515|GO:0005515|GO:0005515|GO:0005515	Leucine-rich repeat profile.|WD domain, G-beta repeat|Trp-Asp (WD) repeats profile.|Trp-Asp (WD) repeats circular profile.	Phypoly-transcript-02463	0.184	SM1
Phypoly-transcript-02275	4.49308e-34	1.00613	0.975	0.85	6.79354e-30	0	L2HDH_NEMVE	GO:0005515|GO:0005509|GO:0005515|GO:0005509	C2 domain|EF-hand calcium-binding domain profile.|C2 domain profile.|EF-hand domain pair	Phypoly-transcript-02275	0.125	SM1
Phypoly-transcript-02894	2.42179e-34	1.00576	0.975	0.783	3.66174e-30	0	SUT41_ARATH	GO:0008272|GO:0015116|GO:0016021	4284	Phypoly-transcript-02894	0.192	SM1
Phypoly-transcript-27534	2.35446e-20	1.00529	0.827	0.595	3.55995e-16	0	TGS1_HUMAN	GO:0001510|GO:0008168|GO:0009452	3883	Phypoly-transcript-27534	0.232	SM1
Phypoly-transcript-07393	9.23515e-28	1.00435	0.883	0.532	1.39635e-23	0	ZDHC6_DICDI	GO:0008270|GO:0005515|GO:0008270|GO:0005515	Zinc finger DHHC-type profile.|Ankyrin repeat profile.|DHHC palmitoyltransferase|Ankyrin repeat	Phypoly-transcript-07393	0.351	SM1
Phypoly-transcript-04022	1.43538e-34	1.00358	0.964	0.832	2.17029e-30	0	ARMC8_BOVIN	GO:0005515	349	Phypoly-transcript-04022	0.132	SM1
Phypoly-transcript-13556	2.18837e-27	1.00306	0.909	0.613	3.30882e-23	0	DAAA_LISIN	GO:0003824|GO:0008152|GO:0003824|GO:0008152	Aminotransferases class-IV signature.|Aminotransferase class IV	Phypoly-transcript-13556	0.296	SM1
Phypoly-transcript-11360	1.29257e-34	1.00207	0.954	0.711	1.95436e-30	0	noGene	GO:0005515	2899	Phypoly-transcript-11360	0.243	SM1
Phypoly-transcript-14633	4.89069e-31	1.00084	0.949	0.673	7.39472e-27	0	H2B_ACRFO	GO:0000786|GO:0003677|GO:0005634|GO:0006334|GO:0003677	Histone H2B signature.|Core histone H2A/H2B/H3/H4	Phypoly-transcript-14633	0.276	SM1
Phypoly-transcript-22446	2.0028e-27	1.00062	0.858	0.497	3.02824e-23	0	YFMJ_BACSU	GO:0008270|GO:0016491|GO:0055114	5000	Phypoly-transcript-22446	0.361	SM1
Phypoly-transcript-08023	3.2038e-27	1.00028	0.954	0.757	4.84415e-23	0	PATL6_ARATH	GO:0006810|GO:0016021	1923	Phypoly-transcript-08023	0.197	SM1
Phypoly-transcript-12394	9.89932e-34	0.999522	0.975	0.734	1.49678e-29	0	ZDHC1_DICDI	GO:0008270|GO:0008270	Zinc finger DHHC-type profile.|DHHC palmitoyltransferase	Phypoly-transcript-12394	0.241	SM1
Phypoly-transcript-19372	6.81989e-35	0.999255	0.964	0.714	1.03117e-30	0	SNX3_RAT	GO:0005515|GO:0007154|GO:0035091|GO:0005515|GO:0007154|GO:0035091	PX domain profile.|PX domain	Phypoly-transcript-19372	0.25	SM1
Phypoly-transcript-16032	3.40361e-35	0.998901	0.97	0.78	5.14627e-31	0	EIF3J_XENLA	GO:0003743|GO:0005737|GO:0005852	4515	Phypoly-transcript-16032	0.19	SM1
Phypoly-transcript-12224	9.56454e-36	0.998414	0.964	0.702	1.44616e-31	0	TDH_MOUSE	GO:0003824|GO:0044237|GO:0050662	2657	Phypoly-transcript-12224	0.262	SM1
Phypoly-transcript-15658	7.75103e-23	0.997728	0.863	0.581	1.17196e-18	0	QUEE_HALS3	GO:0003824|GO:0051536	3570	Phypoly-transcript-15658	0.282	SM1
Phypoly-transcript-19169	1.76879e-26	0.996616	0.939	0.647	2.6744e-22	0	CNBL9_ORYSJ	GO:0005509|GO:0005509	EF-hand domain pair|EF-hand calcium-binding domain profile.	Phypoly-transcript-19169	0.292	SM1
Phypoly-transcript-08644	3.80916e-35	0.99577	0.97	0.694	5.75945e-31	0	CHAC2_DANRE	GO:0003723|GO:0003723	PUA domain|PUA domain profile.	Phypoly-transcript-08644	0.276	SM1
Phypoly-transcript-10971	3.56124e-27	0.995478	0.909	0.682	5.38459e-23	0	ELP4_DICDI	GO:0006357|GO:0033588	2896	Phypoly-transcript-10971	0.227	SM1
Phypoly-transcript-02489	1.56521e-27	0.995202	0.914	0.645	2.3666e-23	0	DNLI_HAEIN	GO:0003909|GO:0051103|GO:0003910|GO:0005524|GO:0006281|GO:0006310	ATP-dependent DNA ligase signature 2.|ATP dependent DNA ligase domain	Phypoly-transcript-02489	0.269	SM1
Phypoly-transcript-07420	6.9479e-34	0.993925	0.975	0.723	1.05052e-29	0	C516B_DICDI	GO:0005506|GO:0016705|GO:0020037|GO:0055114|GO:0016705|GO:0055114	Cytochrome P450|Cytochrome P450 cysteine heme-iron ligand signature.	Phypoly-transcript-07420	0.252	SM1
Phypoly-transcript-02048	1.65822e-30	0.99313	0.944	0.682	2.50723e-26	0	DNLI_HAEIN	GO:0003910|GO:0005524|GO:0006281|GO:0006310|GO:0003910|GO:0005524|GO:0006281|GO:0006310	ATP dependent DNA ligase domain|ATP-dependent DNA ligase family profile.	Phypoly-transcript-02048	0.262	SM1
Phypoly-transcript-05785	1.1234e-28	0.992113	0.954	0.662	1.69858e-24	0	SPX5_ORYSJ	GO:0005515|GO:0008270	4982	Phypoly-transcript-05785	0.292	SM1
Phypoly-transcript-03703	3.0829e-26	0.991437	0.878	0.535	4.66134e-22	0	DNLI_HAEIN	GO:0003910|GO:0005524|GO:0006281|GO:0006310	383	Phypoly-transcript-03703	0.343	SM1
Phypoly-transcript-27029	1.25233e-31	0.991221	0.975	0.714	1.89353e-27	0	GLRX_SOLLC	GO:0009055|GO:0015035|GO:0045454|GO:0009055|GO:0015035|GO:0045454|GO:0009055|GO:0045454	Glutaredoxin domain profile.|Glutaredoxin|Glutaredoxin active site.	Phypoly-transcript-27029	0.261	SM1
Phypoly-transcript-04077	2.58679e-31	0.989714	0.964	0.777	3.91122e-27	0	MRKC_DICDI	GO:0004672|GO:0005524|GO:0006468|GO:0004674|GO:0006468|GO:0005524|GO:0004672|GO:0005524|GO:0006468	Protein kinase domain|Serine/Threonine protein kinases active-site signature.|Protein kinases ATP-binding region signature.|Protein kinase domain profile.	Phypoly-transcript-04077	0.187	SM1
Phypoly-transcript-06972	9.09725e-36	0.989391	0.975	0.899	1.3755e-31	0	ANR52_DANRE	GO:0005515|GO:0005515|GO:0008270	Ankyrin repeat profile.|Zinc finger RING-type profile.	Phypoly-transcript-06972	0.076	SM1
Phypoly-transcript-14216	1.88134e-27	0.988557	0.934	0.671	2.84459e-23	0	GCH1_DICDI	GO:0003934|GO:0005737|GO:0046654|GO:0003934|GO:0005737|GO:0046654	GTP cyclohydrolase I signature 1.|GTP cyclohydrolase I signature 2.	Phypoly-transcript-14216	0.263	SM1
Phypoly-transcript-02914	1.26284e-29	0.988399	0.939	0.728	1.90942e-25	0	DNLI_HAEIN	GO:0003909|GO:0051103|GO:0003910|GO:0005524|GO:0006281|GO:0006310	ATP-dependent DNA ligase signature 2.|ATP dependent DNA ligase domain	Phypoly-transcript-02914	0.211	SM1
Phypoly-transcript-08420	3.70138e-32	0.988118	0.934	0.702	5.59648e-28	0	NLRC3_HUMAN	GO:0005515	2337	Phypoly-transcript-08420	0.232	SM1
Phypoly-transcript-21995	5.56128e-21	0.986422	0.878	0.61	8.40866e-17	0	MSRB2_ARATH	GO:0033743|GO:0055114	4052	Phypoly-transcript-21995	0.268	SM1
Phypoly-transcript-11215	2.5725e-32	0.98616	0.843	0.39	3.88962e-28	0	PP2C2_CAEEL	GO:0003824|GO:0004722|GO:0006470	Protein phosphatase 2C|Protein phosphatase 2C signature.	Phypoly-transcript-11215	0.453	SM1
Phypoly-transcript-05105	1.4533e-36	0.986125	0.98	0.746	2.19739e-32	0	CATIN_DANRE	GO:0005515	592	Phypoly-transcript-05105	0.234	SM1
Phypoly-transcript-07099	3.23201e-32	0.985663	0.97	0.754	4.8868e-28	0	EDA2_ARATH	GO:0006508|GO:0008236|GO:0005515	Serine carboxypeptidase S28|EGF-like domain profile.	Phypoly-transcript-07099	0.216	SM1
Phypoly-transcript-00132	1.70732e-41	0.985638	0.99	0.919	2.58147e-37	0	GEFJ_DICDI	GO:0005085|GO:0005622|GO:0007264|GO:0005085|GO:0007264|GO:0005085|GO:0005622|GO:0007264|GO:0005085|GO:0005622|GO:0051056|GO:0005085|GO:0005622|GO:0051056	RasGEF domain|Ras Guanine-nucleotide exchange factors domain signature.|Ras guanine-nucleotide exchange factors catalytic domain profile.|Ras guanine-nucleotide exchange factors N-terminal domain profile.|RasGEF N-terminal motif	Phypoly-transcript-00132	0.071	SM1
Phypoly-transcript-02075	2.2928e-31	0.985202	0.939	0.708	3.46671e-27	0	PHYSA_PHYPO	GO:0008236	3225	Phypoly-transcript-02075	0.231	SM1
Phypoly-transcript-13745	1.30235e-20	0.984564	0.721	0.35	1.96915e-16	0	YHDF_BACSU	GO:0016491	4111	Phypoly-transcript-13745	0.371	SM1
Phypoly-transcript-14972	2.59528e-25	0.984254	0.863	0.558	3.92407e-21	0	UBQ8_ARATH	GO:0005515|GO:0005515|GO:0005515	Ubiquitin family|Ubiquitin domain profile.|SAM domain profile.	Phypoly-transcript-14972	0.305	SM1
Phypoly-transcript-01472	2.35611e-30	0.984205	0.929	0.717	3.56244e-26	0	YL509_MIMIV	GO:0003909|GO:0051103	415	Phypoly-transcript-01472	0.212	SM1
Phypoly-transcript-20032	1.7587e-26	0.983205	0.914	0.717	2.65915e-22	0	EFHD2_DROME	GO:0005509	1376	Phypoly-transcript-20032	0.197	SM1
Phypoly-transcript-12921	5.38846e-38	0.982939	0.975	0.916	8.14735e-34	0	STAR_DANRE	GO:0003885|GO:0016020|GO:0055114	990	Phypoly-transcript-12921	0.059	SM1
Phypoly-transcript-08193	1.56952e-25	0.98244	0.888	0.621	2.37311e-21	0	noGene	GO:0005515|GO:0005515|GO:0005515	TPR repeat region circular profile.|Tetratricopeptide repeat|TPR repeat profile.	Phypoly-transcript-08193	0.267	SM1
Phypoly-transcript-15213	1.36828e-36	0.982437	0.975	0.734	2.06883e-32	0	NDUS1_RECAM	GO:0008137|GO:0016020|GO:0042773|GO:0055114|GO:0016491|GO:0055114|GO:0009055|GO:0051536|GO:0008137|GO:0016020|GO:0042773|GO:0055114|GO:0008137|GO:0016020|GO:0042773|GO:0055114	Respiratory-chain NADH dehydrogenase 75 Kd subunit signature 2.|NADH-ubiquinone oxidoreductase-G iron-sulfur binding region|2Fe-2S ferredoxin-type iron-sulfur binding domain profile.|Respiratory-chain NADH dehydrogenase 75 Kd subunit signature 1.|Respiratory-chain NADH dehydrogenase 75 Kd subunit signature 3.	Phypoly-transcript-15213	0.241	SM1
Phypoly-transcript-01588	1.60552e-32	0.981374	0.975	0.835	2.42755e-28	0	BRD9_XENTR	GO:0005515|GO:0005515	Bromodomain|Bromodomain profile.	Phypoly-transcript-01588	0.14	SM1
Phypoly-transcript-11012	1.89335e-20	0.981224	0.832	0.5	2.86275e-16	0	SUA5_PYRAB	GO:0003725|GO:0003725	YrdC-like domain profile.|Telomere recombination	Phypoly-transcript-11012	0.332	SM1
Phypoly-transcript-08279	2.45027e-38	0.980972	0.98	0.893	3.70482e-34	0	AP3M_DICDI	GO:0003910|GO:0005524|GO:0006281|GO:0006310|GO:0003909|GO:0051103|GO:0003677|GO:0003910|GO:0006281|GO:0006310|GO:0003909|GO:0051103|GO:0003910|GO:0003910|GO:0006281|GO:0006310|GO:0003910|GO:0005524|GO:0006281|GO:0006310	ATP dependent DNA ligase domain|ATP-dependent DNA ligase signature 2.|DNA ligase N terminus|ATP-dependent DNA ligase AMP-binding site.|DNA ligase IV|ATP dependent DNA ligase C terminal region|ATP-dependent DNA ligase family profile.	Phypoly-transcript-08279	0.087	SM1
Phypoly-transcript-04682	9.40484e-32	0.979486	0.954	0.74	1.42201e-27	0	RED_RAT	GO:0005634	3614	Phypoly-transcript-04682	0.214	SM1
Phypoly-transcript-02142	2.53021e-39	0.979216	0.975	0.838	3.82568e-35	0	COP1_ARATH	GO:0005515|GO:0005515|GO:0005515|GO:0005515|GO:0008270	Trp-Asp (WD) repeats circular profile.|Trp-Asp (WD) repeats profile.|WD domain, G-beta repeat|Zinc finger RING-type profile.	Phypoly-transcript-02142	0.137	SM1
Phypoly-transcript-01933	9.55317e-28	0.97907	0.944	0.749	1.44444e-23	0	DNLI_HAEIN	GO:0003910|GO:0005524|GO:0006281|GO:0006310|GO:0003910|GO:0005524|GO:0006281|GO:0006310|GO:0003909|GO:0051103	ATP dependent DNA ligase domain|ATP-dependent DNA ligase family profile.|ATP-dependent DNA ligase signature 2.	Phypoly-transcript-01933	0.195	SM1
Phypoly-transcript-00617	1.32832e-35	0.978396	0.975	0.798	2.00843e-31	0	MRP3_MOUSE	GO:0005524|GO:0016887|GO:0005524|GO:0016887|GO:0005524|GO:0016887|GO:0005524|GO:0006810|GO:0016021|GO:0042626|GO:0055085|GO:0005524|GO:0006810|GO:0016021|GO:0042626|GO:0055085	ABC transporters family signature.|ATP-binding cassette, ABC transporter-type domain profile.|ABC transporter|ABC transporter transmembrane region|ABC transporter integral membrane type-1 fused domain profile.	Phypoly-transcript-00617	0.177	SM1
Phypoly-transcript-20661	1.20238e-21	0.978314	0.807	0.48	1.818e-17	0	CC14B_MOUSE	GO:0006470|GO:0008138|GO:0016311|GO:0016791|GO:0006470|GO:0008138|GO:0004725|GO:0016311|GO:0016791	Dual specificity protein phosphatase family profile.|Tyrosine specific protein phosphatases family profile.|Dual specificity phosphatase, catalytic domain|Tyrosine specific protein phosphatases active site.	Phypoly-transcript-20661	0.327	SM1
Phypoly-transcript-04021	1.73458e-26	0.977989	0.848	0.465	2.62269e-22	0	RDR1_ORYSJ	GO:0003968	3884	Phypoly-transcript-04021	0.383	SM1
Phypoly-transcript-16669	7.01483e-27	0.977914	0.939	0.604	1.06064e-22	0	YR636_MIMIV	GO:0016884	249	Phypoly-transcript-16669	0.335	SM1
Phypoly-transcript-06286	1.41523e-33	0.976687	0.97	0.798	2.13983e-29	0	DSC1_SCHPO	GO:0005515|GO:0008270|GO:0005515|GO:0008270	Ring finger domain|Zinc finger RING-type profile.	Phypoly-transcript-06286	0.172	SM1
Phypoly-transcript-21510	1.47958e-37	0.976601	0.97	0.711	2.23713e-33	0	CBP_SACER	GO:0005509|GO:0005509	EF-hand calcium-binding domain profile.|EF-hand domain pair	Phypoly-transcript-21510	0.259	SM1
Phypoly-transcript-15392	1.63964e-30	0.976527	0.924	0.65	2.47913e-26	0	noGene	GO:0004725|GO:0016311|GO:0016791	4648	Phypoly-transcript-15392	0.274	SM1
Phypoly-transcript-10338	1.22932e-41	0.976096	0.975	0.783	1.85872e-37	0	CPNE9_HUMAN	GO:0005515	577	Phypoly-transcript-10338	0.192	SM1
Phypoly-transcript-29531	1.48101e-48	0.976009	0.97	0.717	2.23928e-44	0	HMP_BORPE	GO:0016491|GO:0055114	2848	Phypoly-transcript-29531	0.253	SM1
Phypoly-transcript-14176	4.03026e-37	0.975657	0.949	0.708	6.09375e-33	0	PEP12_YEAST	GO:0005515|GO:0005515	t-SNARE coiled-coil homology domain profile.|SNARE domain	Phypoly-transcript-14176	0.241	SM1
Phypoly-transcript-04851	4.08628e-31	0.975521	0.975	0.789	6.17845e-27	0	SRP72_DICDI	GO:0005515|GO:0006614|GO:0008312|GO:0048500	TPR repeat profile.|SRP72 RNA-binding domain	Phypoly-transcript-04851	0.186	SM1
Phypoly-transcript-06699	8.44825e-31	0.974983	0.954	0.711	1.27737e-26	0	noGene	GO:0016757	3394	Phypoly-transcript-06699	0.243	SM1
Phypoly-transcript-19809	6.47492e-33	0.974344	0.959	0.746	9.79007e-29	0	noGene	GO:0003824	4399	Phypoly-transcript-19809	0.213	SM1
Phypoly-transcript-16880	3.65556e-23	0.973952	0.878	0.584	5.52721e-19	0	SDR1_ARATH	GO:0008152|GO:0016491	4110	Phypoly-transcript-16880	0.294	SM1
Phypoly-transcript-02864	6.85762e-33	0.973838	0.919	0.63	1.03687e-28	0	PARP1_RAT	GO:0003950|GO:0003950|GO:0006471|GO:0003950|GO:0003950|GO:0006471	PARP catalytic domain profile.|PARP alpha-helical domain profile.|Poly(ADP-ribose) polymerase catalytic domain|Poly(ADP-ribose) polymerase, regulatory domain	Phypoly-transcript-02864	0.289	SM1
Phypoly-transcript-07129	2.6568e-33	0.972962	0.985	0.815	4.01708e-29	0	KINX_DICDI	GO:0004672|GO:0006468|GO:0005524|GO:0004674|GO:0006468|GO:0004672|GO:0005524|GO:0006468	Protein tyrosine kinase|Protein kinases ATP-binding region signature.|Serine/Threonine protein kinases active-site signature.|Protein kinase domain profile.	Phypoly-transcript-07129	0.17	SM1
Phypoly-transcript-07471	6.60068e-37	0.972638	0.985	0.815	9.98023e-33	0	Y3800_DICDI	GO:0005515|GO:0005515	Bromodomain|Bromodomain profile.	Phypoly-transcript-07471	0.17	SM1
Phypoly-transcript-06309	2.67361e-31	0.972518	0.954	0.691	4.0425e-27	0	RESA_BACCR	GO:0016787|GO:0016209|GO:0016491|GO:0055114	Putative phosphatase (DUF442)|AhpC/TSA family	Phypoly-transcript-06309	0.263	SM1
Phypoly-transcript-02330	1.33518e-51	0.972323	0.995	0.96	2.01879e-47	0	RIR1_DICDI	GO:0004748|GO:0005524|GO:0006260|GO:0055114|GO:0006260|GO:0055114	Ribonucleotide reductase, all-alpha domain|Ribonucleotide reductase, barrel domain	Phypoly-transcript-02330	0.035	SM1
Phypoly-transcript-21773	1.61019e-39	0.972012	0.97	0.801	2.43461e-35	0	FIBP_CHLAE	GO:0017134	110	Phypoly-transcript-21773	0.169	SM1
Phypoly-transcript-15431	2.10854e-34	0.971318	0.975	0.751	3.18812e-30	0	MAF1_DICDI	GO:0016480	2386	Phypoly-transcript-15431	0.224	SM1
Phypoly-transcript-00463	1.05935e-38	0.970743	0.98	0.913	1.60173e-34	0	MCTP1_HUMAN	GO:0005515|GO:0005515	C2 domain profile.|C2 domain	Phypoly-transcript-00463	0.067	SM1
Phypoly-transcript-00612	4.49445e-40	0.970368	0.985	0.931	6.7956e-36	0	RBP9X_DROME	GO:0005509|GO:0005515|GO:0005515|GO:0007165|GO:0005515	EF-hand calcium-binding domain profile.|SPRY domain|TIR domain|SAM domain profile.	Phypoly-transcript-00612	0.054	SM1
Phypoly-transcript-05126	5.22549e-34	0.969749	0.964	0.789	7.90094e-30	0	PYR1_DICDI	GO:0006520|GO:0016597|GO:0016743|GO:0006520|GO:0016597|GO:0016743|GO:0006520|GO:0016743	Aspartate and ornithine carbamoyltransferases signature.|Aspartate/ornithine carbamoyltransferase, Asp/Orn binding domain|Aspartate/ornithine carbamoyltransferase, carbamoyl-P binding domain	Phypoly-transcript-05126	0.175	SM1
Phypoly-transcript-03802	5.45297e-37	0.969681	0.99	0.87	8.24489e-33	0	WDR12_DICDI	GO:0005515|GO:0005515|GO:0005515	Trp-Asp (WD) repeats profile.|Trp-Asp (WD) repeats circular profile.|WD domain, G-beta repeat	Phypoly-transcript-03802	0.12	SM1
Phypoly-transcript-17475	2.24157e-37	0.968829	0.97	0.731	3.38926e-33	0	CDO1_DANRE	GO:0005506|GO:0017172|GO:0046439|GO:0055114	937	Phypoly-transcript-17475	0.239	SM1
Phypoly-transcript-06682	9.14203e-41	0.968151	0.98	0.847	1.38228e-36	0	PP2AB_DICDI	GO:0016787|GO:0016787	Serine/threonine specific protein phosphatases signature.|Calcineurin-like phosphoesterase	Phypoly-transcript-06682	0.133	SM1
Phypoly-transcript-11746	2.87398e-20	0.967432	0.802	0.488	4.34546e-16	0	NIT2_DICDI	GO:0006807|GO:0016810|GO:0006807|GO:0016810	Carbon-nitrogen hydrolase|Carbon-nitrogen hydrolase domain profile.	Phypoly-transcript-11746	0.314	SM1
Phypoly-transcript-15232	3.02e-26	0.966875	0.579	0.145	4.56623e-22	0	EME1_PONAB	GO:0003677|GO:0004518	1449	Phypoly-transcript-15232	0.434	SM1
Phypoly-transcript-13649	1.034e-32	0.96663	0.975	0.841	1.5634e-28	0	PGAM_DICDI	GO:0003824|GO:0008152	3045	Phypoly-transcript-13649	0.134	SM1
Phypoly-transcript-04157	2.47475e-34	0.966276	0.97	0.746	3.74182e-30	0	HIBCH_CHICK	GO:0003824|GO:0008152	1436	Phypoly-transcript-04157	0.224	SM1
Phypoly-transcript-27561	2.63302e-27	0.96507	0.959	0.679	3.98112e-23	0	noGene	GO:0016020	4539	Phypoly-transcript-27561	0.28	SM1
Phypoly-transcript-18402	2.58875e-30	0.964382	0.964	0.743	3.91419e-26	0	noGene	GO:0016020	2458	Phypoly-transcript-18402	0.221	SM1
Phypoly-transcript-04903	2.14425e-26	0.964183	0.909	0.676	3.24211e-22	0	ALG12_DROME	GO:0016757	214	Phypoly-transcript-04903	0.233	SM1
Phypoly-transcript-02378	3.4464e-36	0.963901	0.985	0.879	5.21096e-32	0	IMB1_HUMAN	GO:0006886|GO:0008536|GO:0006886|GO:0008536|GO:0005515	Importin-beta N-terminal domain profile.|Importin-beta N-terminal domain|HEAT repeat	Phypoly-transcript-02378	0.106	SM1
Phypoly-transcript-14426	4.37133e-37	0.962536	0.98	0.853	6.60945e-33	0	PEX11_DICDI	GO:0005779|GO:0016559	2968	Phypoly-transcript-14426	0.127	SM1
Phypoly-transcript-08307	1.8501e-24	0.962382	0.909	0.621	2.79735e-20	0	ARK73_HUMAN	GO:0016881|GO:0016881	Ubiquitin-conjugating enzyme|Ubiquitin-conjugating enzymes family profile.	Phypoly-transcript-08307	0.288	SM1
Phypoly-transcript-09961	1.24505e-32	0.962002	0.97	0.725	1.88251e-28	0	BZPN_DICDI	GO:0003700|GO:0006355|GO:0043565|GO:0003700|GO:0006355|GO:0043565	Basic-leucine zipper (bZIP) domain profile.|Basic region leucine zipper	Phypoly-transcript-09961	0.245	SM1
Phypoly-transcript-03960	1.48521e-25	0.961772	0.939	0.763	2.24564e-21	0	MYOC_DICDI	GO:0003774|GO:0005524|GO:0016459|GO:0003774|GO:0016459|GO:0005515|GO:0005515	Myosin head (motor domain)|Myosin tail|SH3 domain|Src homology 3 (SH3) domain profile.	Phypoly-transcript-03960	0.176	SM1
Phypoly-transcript-15637	1.88154e-26	0.961628	0.949	0.697	2.84489e-22	0	YE31_SCHPO	GO:0005524|GO:0016887|GO:0005524|GO:0016887	ABC transporter|ATP-binding cassette, ABC transporter-type domain profile.	Phypoly-transcript-15637	0.252	SM1
Phypoly-transcript-04291	3.12812e-36	0.96104	0.98	0.893	4.72972e-32	0	CNNM4_HUMAN	GO:0005515	2337	Phypoly-transcript-04291	0.087	SM1
Phypoly-transcript-01544	7.39675e-31	0.961004	0.975	0.775	1.11839e-26	0	HERC4_MOUSE	GO:0004842|GO:0004842	HECT domain profile.|HECT-domain (ubiquitin-transferase)	Phypoly-transcript-01544	0.2	SM1
Phypoly-transcript-11629	1.4039e-29	0.960194	0.939	0.717	2.12269e-25	0	PIGS_BOVIN	GO:0016255|GO:0042765	3017	Phypoly-transcript-11629	0.222	SM1
Phypoly-transcript-12084	2.49999e-33	0.959203	0.964	0.76	3.77998e-29	0	KCC1A_HUMAN	GO:0004672|GO:0005524|GO:0006468|GO:0004674|GO:0006468|GO:0004672|GO:0005524|GO:0006468|GO:0005524	Protein kinase domain profile.|Serine/Threonine protein kinases active-site signature.|Protein kinase domain|Protein kinases ATP-binding region signature.	Phypoly-transcript-12084	0.204	SM1
Phypoly-transcript-13350	1.67026e-24	0.958523	0.924	0.685	2.52543e-20	0	RAB1_THEPA	GO:0005525|GO:0007264	3588	Phypoly-transcript-13350	0.239	SM1
Phypoly-transcript-04696	4.14391e-33	0.958359	0.964	0.789	6.26559e-29	0	AB3F_ARATH	GO:0005524|GO:0016887|GO:0005524|GO:0016887|GO:0005524|GO:0016887	ABC transporter|ATP-binding cassette, ABC transporter-type domain profile.|ABC transporters family signature.	Phypoly-transcript-04696	0.175	SM1
Phypoly-transcript-07877	1.60778e-32	0.958275	0.939	0.569	2.43097e-28	0	GPT2_YEAST	GO:0008152|GO:0016746	145	Phypoly-transcript-07877	0.37	SM1
Phypoly-transcript-15858	3.19217e-34	0.957953	0.975	0.754	4.82657e-30	0	CHMP5_DICDI	GO:0015031	4171	Phypoly-transcript-15858	0.221	SM1
Phypoly-transcript-12260	2.3742e-37	0.957546	0.975	0.803	3.58979e-33	0	Y3989_DICDI	GO:0005515	1667	Phypoly-transcript-12260	0.172	SM1
Phypoly-transcript-01897	5.70998e-35	0.95745	0.985	0.815	8.63348e-31	0	UBP2_YEAST	GO:0004221|GO:0006511|GO:0004221|GO:0006511|GO:0004221|GO:0006511|GO:0004221|GO:0006511	Ubiquitin carboxyl-terminal hydrolases family 2 signature 1.|Ubiquitin carboxyl-terminal hydrolases family 2 signature 2.|Ubiquitin carboxyl-terminal hydrolases family 2 profile.|Ubiquitin carboxyl-terminal hydrolase	Phypoly-transcript-01897	0.17	SM1
Phypoly-transcript-23813	2.54244e-13	0.957115	0.584	0.28	3.84418e-09	0	NEUFC_DROPS	GO:0020037	955	Phypoly-transcript-23813	0.304	SM1
Phypoly-transcript-15510	3.73686e-21	0.955985	0.827	0.592	5.65013e-17	0	ABCH2_DICDI	GO:0005524|GO:0016887|GO:0005524|GO:0016887|GO:0005524|GO:0016887	ABC transporters family signature.|ABC transporter|ATP-binding cassette, ABC transporter-type domain profile.	Phypoly-transcript-15510	0.235	SM1
Phypoly-transcript-08537	5.03222e-34	0.955984	0.97	0.858	7.60872e-30	0	YODQ_BACSU	GO:0008152|GO:0016787	2938	Phypoly-transcript-08537	0.112	SM1
Phypoly-transcript-16281	8.11643e-28	0.955705	0.924	0.688	1.2272e-23	0	RBM42_XENTR	GO:0003676|GO:0003676	RNA recognition motif. (a.k.a. RRM, RBD, or RNP domain)|Eukaryotic RNA Recognition Motif (RRM) profile.	Phypoly-transcript-16281	0.236	SM1
Phypoly-transcript-04449	9.3675e-35	0.954813	0.98	0.812	1.41637e-30	0	GEFR_DICDI	GO:0005085|GO:0005622|GO:0051056|GO:0005085|GO:0005622|GO:0007264|GO:0005085|GO:0005622|GO:0051056|GO:0005085|GO:0005622|GO:0007264	RasGEF N-terminal motif|RasGEF domain|Ras guanine-nucleotide exchange factors N-terminal domain profile.|Ras guanine-nucleotide exchange factors catalytic domain profile.	Phypoly-transcript-04449	0.168	SM1
Phypoly-transcript-13735	9.31237e-28	0.95464	0.873	0.604	1.40803e-23	0	MARC1_XENLA	GO:0003824|GO:0030151|GO:0030170|GO:0003824|GO:0030151|GO:0030170	MOSC domain|MOSC domain profile.	Phypoly-transcript-13735	0.269	SM1
Phypoly-transcript-01840	3.37099e-37	0.954146	0.949	0.679	5.09693e-33	0	SGTB_HUMAN	GO:0005515|GO:0005515	TPR repeat profile.|TPR repeat region circular profile.	Phypoly-transcript-01840	0.27	SM1
Phypoly-transcript-07999	1.83222e-30	0.952947	0.665	0.165	2.77032e-26	0	TF3C2_HUMAN	GO:0005515	4874	Phypoly-transcript-07999	0.5	SM1
Phypoly-transcript-23346	6.46603e-36	0.951415	0.959	0.705	9.77663e-32	0	TM14C_HUMAN	GO:0016020	4539	Phypoly-transcript-23346	0.254	SM1
Phypoly-transcript-26488	8.10104e-22	0.95125	0.624	0.246	1.22488e-17	0	DNAL4_PIG	GO:0005875|GO:0007017	1350	Phypoly-transcript-26488	0.378	SM1
Phypoly-transcript-06509	1.39132e-33	0.950853	0.98	0.829	2.10367e-29	0	LIMB_DICDI	GO:0008270|GO:0008270|GO:0008270	LIM zinc-binding domain signature.|LIM domain profile.|LIM domain	Phypoly-transcript-06509	0.151	SM1
Phypoly-transcript-14746	2.23998e-42	0.949626	0.985	0.827	3.38685e-38	0	RAN_BRUMA	GO:0003924|GO:0005525|GO:0006184|GO:0006886|GO:0006913|GO:0007165|GO:0005525|GO:0007264	small GTPase Ran family profile.|Ras family	Phypoly-transcript-14746	0.158	SM1
Phypoly-transcript-05048	1.14869e-34	0.949465	0.97	0.78	1.73682e-30	0	NCB5R_DICDI	GO:0016491|GO:0055114|GO:0016491|GO:0055114	Ferredoxin reductase-type FAD binding domain profile.|Oxidoreductase NAD-binding domain	Phypoly-transcript-05048	0.19	SM1
Phypoly-transcript-23233	2.32532e-11	0.948977	0.416	0.176	3.51589e-07	0	AP1S1_DICDI	GO:0006886|GO:0016192|GO:0030117	790	Phypoly-transcript-23233	0.24	SM1
Phypoly-transcript-02308	2.28029e-32	0.948864	0.985	0.939	3.44779e-28	0	MAL13_YEAST	GO:0000981|GO:0005634|GO:0006355|GO:0008270|GO:0000981|GO:0005634|GO:0006355|GO:0008270|GO:0000981|GO:0005634|GO:0006355|GO:0008270	Zn(2)-C6 fungal-type DNA-binding domain signature.|Fungal Zn(2)-Cys(6) binuclear cluster domain|Zn(2)-C6 fungal-type DNA-binding domain profile.	Phypoly-transcript-02308	0.046	SM1
Phypoly-transcript-07203	6.60018e-33	0.948343	0.975	0.769	9.97947e-29	0	AIFM1_DICDI	GO:0016491|GO:0050660|GO:0055114|GO:0016491|GO:0055114	3521	Phypoly-transcript-07203	0.206	SM1
Phypoly-transcript-12846	1.54462e-30	0.948073	0.954	0.72	2.33547e-26	0	ANR54_MOUSE	GO:0005515|GO:0007165|GO:0007165|GO:0005856	Ankyrin repeat profile.|Ras-associating (RA) domain profile.|Ras association (RalGDS/AF-6) domain|FERM domain profile.	Phypoly-transcript-12846	0.234	SM1
Phypoly-transcript-05952	3.05155e-23	0.947418	0.853	0.61	4.61394e-19	0	DCDA_METTH	GO:0003824|GO:0003824	Pyridoxal-dependent decarboxylase, pyridoxal binding domain|Pyridoxal-dependent decarboxylase, C-terminal sheet domain	Phypoly-transcript-05952	0.243	SM1
Phypoly-transcript-01346	5.37649e-30	0.947256	0.949	0.734	8.12926e-26	0	TDCB_STAAW	GO:0005509	1376	Phypoly-transcript-01346	0.215	SM1
Phypoly-transcript-05471	2.88865e-31	0.94706	0.98	0.801	4.36765e-27	0	Y5279_ARATH	GO:0030554|GO:0030554	CBS domain profile.|CBS domain	Phypoly-transcript-05471	0.179	SM1
Phypoly-transcript-14203	7.03606e-27	0.947019	0.934	0.769	1.06385e-22	0	noGene	GO:0003676|GO:0008270	4961	Phypoly-transcript-14203	0.165	SM1
Phypoly-transcript-09428	2.26726e-31	0.946166	0.964	0.743	3.4281e-27	0	AFR_ENSAD	GO:0016491|GO:0008152|GO:0016491|GO:0055114	Oxidoreductase family, NAD-binding Rossmann fold|Oxidoreductase family, C-terminal alpha/beta domain	Phypoly-transcript-09428	0.221	SM1
Phypoly-transcript-06364	7.19284e-38	0.946094	0.985	0.844	1.08756e-33	0	NGAP_DICDI	GO:0005096|GO:0005622|GO:0051056|GO:0005096|GO:0005622|GO:0051056	GTPase-activator protein for Ras-like GTPase|Ras GTPase-activating proteins profile.	Phypoly-transcript-06364	0.141	SM1
Phypoly-transcript-08566	1.92996e-34	0.945808	0.97	0.728	2.91809e-30	0	CP4F8_HUMAN	GO:0016705|GO:0055114|GO:0005506|GO:0016705|GO:0020037|GO:0055114	Cytochrome P450 cysteine heme-iron ligand signature.|Cytochrome P450	Phypoly-transcript-08566	0.242	SM1
Phypoly-transcript-00456	3.42217e-34	0.945712	0.985	0.913	5.17432e-30	0	PATS1_DICDI	GO:0005515|GO:0005515|GO:0016311|GO:0016791|GO:0007165|GO:0016311|GO:0016791|GO:0007165	Leucine-rich repeat profile.|Leucine Rich Repeat|Myotubularin phosphatase domain.|RhoGAP domain|Myotubularin-like phosphatase domain|Rho GTPase-activating proteins domain profile.	Phypoly-transcript-00456	0.072	SM1
Phypoly-transcript-11704	2.13646e-30	0.945459	0.975	0.754	3.23033e-26	0	TF2AA_DICDI	GO:0005672|GO:0006367	4470	Phypoly-transcript-11704	0.221	SM1
Phypoly-transcript-01575	2.27876e-24	0.944504	0.909	0.746	3.44548e-20	0	DNLI_HAEIN	GO:0003909|GO:0051103|GO:0003910|GO:0005524|GO:0006281|GO:0006310|GO:0003910|GO:0005524|GO:0006281|GO:0006310	ATP-dependent DNA ligase signature 2.|ATP-dependent DNA ligase family profile.|ATP dependent DNA ligase domain	Phypoly-transcript-01575	0.163	SM1
Phypoly-transcript-13455	4.7072e-22	0.944312	0.888	0.601	7.11729e-18	0	SUF4_ARATH	GO:0046872	4959	Phypoly-transcript-13455	0.287	SM1
Phypoly-transcript-07886	6.43138e-26	0.9443	0.777	0.332	9.72424e-22	0	AGAL_COFAR	GO:0004553|GO:0005975	2449	Phypoly-transcript-07886	0.445	SM1
Phypoly-transcript-05018	5.25363e-31	0.944156	0.878	0.488	7.94349e-27	0	noGene	GO:0005515	2225	Phypoly-transcript-05018	0.39	SM1
Phypoly-transcript-31429	6.16766e-05	0.943865	0.132	0.04	0.93255	0	FDC1_YEAST	GO:0005886|GO:0006744|GO:0016831	33	Phypoly-transcript-31429	0.092	SM1
Phypoly-transcript-19062	5.695e-32	0.943772	0.97	0.711	8.61084e-28	0	PR2E2_ORYSJ	GO:0016491	3615	Phypoly-transcript-19062	0.259	SM1
Phypoly-transcript-10527	1.96799e-38	0.942624	0.985	0.829	2.9756e-34	0	noGene	GO:0004553|GO:0005975	1864	Phypoly-transcript-10527	0.156	SM1
Phypoly-transcript-03251	3.62121e-34	0.94244	0.985	0.922	5.47527e-30	0	MYOJ_DICDI	GO:0005515	1092	Phypoly-transcript-03251	0.063	SM1
Phypoly-transcript-09337	6.7358e-19	0.941948	0.832	0.613	1.01845e-14	0	SETD3_XENTR	GO:0005515|GO:0005515	SET domain profile.|SET domain	Phypoly-transcript-09337	0.219	SM1
Phypoly-transcript-20309	3.5058e-24	0.941837	0.919	0.691	5.30077e-20	0	PPIL1_RHIO9	GO:0003755|GO:0006457|GO:0003755|GO:0006457|GO:0003755|GO:0006457	Cyclophilin-type peptidyl-prolyl cis-trans isomerase domain profile.|Cyclophilin-type peptidyl-prolyl cis-trans isomerase signature.|Cyclophilin type peptidyl-prolyl cis-trans isomerase/CLD	Phypoly-transcript-20309	0.228	SM1
Phypoly-transcript-22344	2.38502e-34	0.941836	0.97	0.702	3.60614e-30	0	UBCX_DICDI	GO:0016881|GO:0016881	Ubiquitin-conjugating enzyme|Ubiquitin-conjugating enzymes family profile.	Phypoly-transcript-22344	0.268	SM1
Phypoly-transcript-09964	6.045e-30	0.94157	0.97	0.815	9.14005e-26	0	LIAS_DANRE	GO:0003824|GO:0051536	3570	Phypoly-transcript-09964	0.155	SM1
Phypoly-transcript-00673	3.40449e-30	0.941258	0.975	0.861	5.14759e-26	0	XDH_DICDI	GO:0051537|GO:0003824|GO:0016614|GO:0050660|GO:0055114|GO:0016491|GO:0055114|GO:0009055|GO:0051536|GO:0009055|GO:0051536|GO:0016491|GO:0055114|GO:0016491|GO:0046872|GO:0055114	2Fe-2S ferredoxin-type iron-sulfur binding region signature.|PCMH-type FAD-binding domain profile.|Molybdopterin-binding domain of aldehyde dehydrogenase|2Fe-2S ferredoxin-type iron-sulfur binding domain profile.|2Fe-2S iron-sulfur cluster binding domain|FAD binding domain in molybdopterin dehydrogenase|[2Fe-2S] binding domain	Phypoly-transcript-00673	0.114	SM1
Phypoly-transcript-02646	2.35953e-34	0.940644	0.985	0.841	3.56761e-30	0	STATA_DICDI	GO:0005515|GO:0005515	SH2 domain|Src homology 2 (SH2) domain profile.	Phypoly-transcript-02646	0.144	SM1
Phypoly-transcript-14134	1.54462e-29	0.940153	0.949	0.737	2.33547e-25	0	RL4_RHOCS	GO:0003735|GO:0005840|GO:0006412	3773	Phypoly-transcript-14134	0.212	SM1
Phypoly-transcript-08968	5.86464e-21	0.93993	0.766	0.439	8.86733e-17	0	SQRD_HUMAN	GO:0016491|GO:0055114	3521	Phypoly-transcript-08968	0.327	SM1
Phypoly-transcript-23939	9.99315e-10	0.939597	0.563	0.344	1.51096e-05	0	TOIPA_ONCMY	GO:0005515	577	Phypoly-transcript-23939	0.219	SM1
Phypoly-transcript-08259	2.38063e-14	0.93927	0.706	0.46	3.59951e-10	0	B3GT6_MOUSE	GO:0006486|GO:0008378|GO:0016020	1730	Phypoly-transcript-08259	0.246	SM1
Phypoly-transcript-12831	1.65861e-21	0.938869	0.873	0.61	2.50782e-17	0	ALRA_DICDI	GO:0016491|GO:0055114|GO:0016491|GO:0055114	Aldo/keto reductase family signature 2.|Aldo/keto reductase family signature 1.	Phypoly-transcript-12831	0.263	SM1
Phypoly-transcript-21784	7.54652e-18	0.937612	0.741	0.436	1.14103e-13	0	MMAD_GECJA	GO:0005739|GO:0009235	4750	Phypoly-transcript-21784	0.305	SM1
Phypoly-transcript-09120	3.61204e-37	0.937008	0.98	0.879	5.46141e-33	0	FTSZA_DICDI	GO:0005525|GO:0005737|GO:0005525|GO:0005737	FtsZ protein signature 1.|FtsZ protein signature 2.	Phypoly-transcript-09120	0.101	SM1
Phypoly-transcript-11131	9.96912e-28	0.935943	0.954	0.731	1.50733e-23	0	QTRD1_DANRE	GO:0006400|GO:0008479|GO:0008616	3545	Phypoly-transcript-11131	0.223	SM1
Phypoly-transcript-10296	4.81106e-26	0.9358	0.97	0.754	7.27433e-22	0	KCTD3_HUMAN	GO:0005515|GO:0051260	BTB domain profile.|BTB/POZ domain	Phypoly-transcript-10296	0.216	SM1
Phypoly-transcript-01481	2.96407e-35	0.93574	0.975	0.757	4.48167e-31	0	GLUD2_DICDI	GO:0006520|GO:0016491|GO:0055114	1801	Phypoly-transcript-01481	0.218	SM1
Phypoly-transcript-03046	2.20018e-30	0.934771	0.964	0.717	3.32668e-26	0	Y9871_DICDI	GO:0005515|GO:0004672|GO:0005524|GO:0006468|GO:0004672|GO:0005524|GO:0006468|GO:0005515|GO:0004672|GO:0006468|GO:0004674|GO:0006468	Forkhead-associated (FHA) domain profile.|Protein kinase domain profile.|Protein kinase domain|FHA domain|Protein tyrosine kinase|Serine/Threonine protein kinases active-site signature.	Phypoly-transcript-03046	0.247	SM1
Phypoly-transcript-16594	1.82706e-20	0.934689	0.873	0.639	2.76252e-16	0	RPA12_MOUSE	GO:0003676|GO:0006351|GO:0008270|GO:0003676|GO:0006351|GO:0008270	Transcription factor S-II (TFIIS)|Zinc finger TFIIS-type profile.	Phypoly-transcript-16594	0.234	SM1
Phypoly-transcript-16709	5.42212e-19	0.934603	0.802	0.494	8.19824e-15	0	GSTT2_HUMAN	GO:0005515|GO:0005515	Glutathione S-transferase, N-terminal domain|Soluble glutathione S-transferase N-terminal domain profile.	Phypoly-transcript-16709	0.308	SM1
Phypoly-transcript-01864	3.80358e-29	0.933757	0.985	0.855	5.75101e-25	0	STIP1_BOVIN	GO:0005515|GO:0005515	TPR repeat profile.|TPR repeat region circular profile.	Phypoly-transcript-01864	0.13	SM1
Phypoly-transcript-20306	3.79087e-30	0.933689	0.975	0.786	5.7318e-26	0	GLRXL_DICDI	GO:0009055|GO:0015035|GO:0045454|GO:0009055|GO:0015035|GO:0045454	Glutaredoxin|Glutaredoxin domain profile.	Phypoly-transcript-20306	0.189	SM1
Phypoly-transcript-13141	2.90327e-20	0.933022	0.848	0.592	4.38975e-16	0	HSDD2_ARATH	GO:0003854|GO:0006694|GO:0016616|GO:0055114	26	Phypoly-transcript-13141	0.256	SM1
Phypoly-transcript-04501	7.56674e-34	0.933003	0.99	0.821	1.14409e-29	0	DPF6_CAEEL	GO:0006508|GO:0008236|GO:0004252|GO:0070008	Prolyl oligopeptidase family|Prolyl oligopeptidase, N-terminal beta-propeller domain	Phypoly-transcript-04501	0.169	SM1
Phypoly-transcript-03599	4.0942e-25	0.932376	0.934	0.801	6.19043e-21	0	CTSL2_DICDI	GO:0005515|GO:0005515	FCP1 homology domain profile.|NLI interacting factor-like phosphatase	Phypoly-transcript-03599	0.133	SM1
Phypoly-transcript-22151	1.95916e-27	0.932302	0.985	0.864	2.96224e-23	0	noGene	GO:0005740|GO:0005750|GO:0006122	4671	Phypoly-transcript-22151	0.121	SM1
Phypoly-transcript-06043	3.94443e-27	0.931532	0.919	0.624	5.96398e-23	0	NELFD_HUMAN	GO:0005634|GO:0045892	4384	Phypoly-transcript-06043	0.295	SM1
Phypoly-transcript-07084	1.18185e-35	0.931405	0.975	0.801	1.78695e-31	0	EIF3E_NEMVE	GO:0005515	2903	Phypoly-transcript-07084	0.174	SM1
Phypoly-transcript-02238	1.51266e-36	0.931129	0.975	0.89	2.28715e-32	0	SRE1_DICDI	GO:0016021	1921	Phypoly-transcript-02238	0.085	SM1
Phypoly-transcript-00601	8.72264e-31	0.930108	0.97	0.85	1.31886e-26	0	RPC1_DICDI	GO:0003677|GO:0003899|GO:0006351|GO:0003677|GO:0003899|GO:0006351|GO:0003677|GO:0003899|GO:0006351|GO:0003677|GO:0003899|GO:0006351|GO:0003677|GO:0003899|GO:0006351	RNA polymerase Rpb1, domain 3|RNA polymerase Rpb1, domain 4|RNA polymerase Rpb1, domain 1|RNA polymerase Rpb1, domain 5|RNA polymerase Rpb1, domain 2	Phypoly-transcript-00601	0.12	SM1
Phypoly-transcript-22507	2.32928e-23	0.929023	0.838	0.514	3.52187e-19	0	NUD18_RAT	GO:0016787|GO:0016787|GO:0016787	NUDIX domain|Nudix hydrolase domain profile.|Nudix box signature.	Phypoly-transcript-22507	0.324	SM1
Phypoly-transcript-02490	1.89586e-27	0.927249	0.944	0.734	2.86654e-23	0	MYOA_DICDI	GO:0003774|GO:0005524|GO:0016459	2608	Phypoly-transcript-02490	0.21	SM1
Phypoly-transcript-01693	9.44578e-35	0.926652	0.98	0.899	1.4282e-30	0	SPNA_DICDI	GO:0003924|GO:0004871|GO:0007186|GO:0019001|GO:0031683|GO:0003824|GO:0004722|GO:0006470	G-protein alpha subunit|Protein phosphatase 2C|Protein phosphatase 2C signature.	Phypoly-transcript-01693	0.081	SM1
Phypoly-transcript-15197	1.50989e-34	0.926266	0.98	0.798	2.28295e-30	0	SPEE_DICDI	GO:0003824|GO:0003824|GO:0003824	Spermine/spermidine synthase|Spermidine/spermine synthases family profile.|Spermidine/spermine synthases family signature.	Phypoly-transcript-15197	0.182	SM1
Phypoly-transcript-14946	1.77631e-26	0.925561	0.863	0.474	2.68579e-22	0	GRLE_DICDI	GO:0004930|GO:0007186|GO:0016021|GO:0004930|GO:0007186|GO:0016021	7 transmembrane sweet-taste receptor of 3 GCPR|G-protein coupled receptors family 3 profile.	Phypoly-transcript-14946	0.389	SM1
Phypoly-transcript-04249	2.9264e-33	0.925388	0.98	0.858	4.42471e-29	0	GYP2_EMENI	GO:0005097|GO:0032313|GO:0005509|GO:0005097|GO:0032313|GO:0005509	TBC/rab GAP domain profile.|EF-hand domain|Rab-GTPase-TBC domain|EF-hand calcium-binding domain profile.	Phypoly-transcript-04249	0.122	SM1
Phypoly-transcript-06367	9.67817e-41	0.924483	0.929	0.39	1.46334e-36	0	noGene	GO:0005634|GO:0006260|GO:0006281|GO:0017108|GO:0033557	4146	Phypoly-transcript-06367	0.539	SM1
Phypoly-transcript-06368	2.16359e-31	0.924375	0.959	0.772	3.27134e-27	0	TF2H3_DICDI	GO:0000439|GO:0006289|GO:0006355	4477	Phypoly-transcript-06368	0.187	SM1
Phypoly-transcript-07334	1.9914e-31	0.924209	0.964	0.792	3.011e-27	0	AGAL_COFAR	GO:0004553|GO:0005975|GO:0004553|GO:0005975	Alpha-galactosidase signature.|Melibiase	Phypoly-transcript-07334	0.172	SM1
Phypoly-transcript-02315	1.18159e-31	0.923083	0.985	0.806	1.78657e-27	0	PSA_MOUSE	GO:0008237|GO:0008270	2936	Phypoly-transcript-02315	0.179	SM1
Phypoly-transcript-12299	4.02138e-31	0.922132	0.975	0.769	6.08033e-27	0	BST1_MOUSE	GO:0003953	174	Phypoly-transcript-12299	0.206	SM1
Phypoly-transcript-05709	2.78943e-26	0.922042	0.914	0.665	4.21762e-22	0	WDR13_MOUSE	GO:0005515|GO:0005515|GO:0005515	Trp-Asp (WD) repeats profile.|Trp-Asp (WD) repeats circular profile.|WD domain, G-beta repeat	Phypoly-transcript-05709	0.249	SM1
Phypoly-transcript-07689	1.687e-30	0.92202	0.975	0.705	2.55074e-26	0	noGene	GO:0005515|GO:0005515	CUE domain profile.|CUE domain	Phypoly-transcript-07689	0.27	SM1
Phypoly-transcript-19440	2.13089e-22	0.92196	0.893	0.642	3.22191e-18	0	HPCL1_RAT	GO:0005509|GO:0005509	EF-hand domain pair|EF-hand calcium-binding domain profile.	Phypoly-transcript-19440	0.251	SM1
Phypoly-transcript-17423	6.98586e-27	0.921564	0.939	0.697	1.05626e-22	0	noGene	GO:0008080|GO:0008080	Gcn5-related N-acetyltransferase (GNAT) domain profile.|Acetyltransferase (GNAT) family	Phypoly-transcript-17423	0.242	SM1
Phypoly-transcript-16463	4.78252e-31	0.921467	0.964	0.697	7.23117e-27	0	TV23A_DICDI	GO:0016021	1491	Phypoly-transcript-16463	0.267	SM1
Phypoly-transcript-22926	2.04252e-12	0.921291	0.655	0.39	3.08829e-08	0	noGene	GO:0003830|GO:0006487|GO:0016020	1901	Phypoly-transcript-22926	0.265	SM1
Phypoly-transcript-19586	1.13974e-21	0.921223	0.68	0.318	1.72329e-17	0	noGene	GO:0016491|GO:0016706|GO:0055114|GO:0016491|GO:0016706|GO:0055114	Fe(2+) 2-oxoglutarate dioxygenase domain profile.|2OG-Fe(II) oxygenase superfamily	Phypoly-transcript-19586	0.362	SM1
Phypoly-transcript-08760	1.56326e-36	0.921084	0.98	0.942	2.36364e-32	0	SMS2_HUMAN	GO:0005085|GO:0005622|GO:0051056|GO:0005085|GO:0005622|GO:0007264|GO:0005085|GO:0005622|GO:0051056|GO:0005085|GO:0005622|GO:0007264	Ras guanine-nucleotide exchange factors N-terminal domain profile.|Ras guanine-nucleotide exchange factors catalytic domain profile.|RasGEF N-terminal motif|RasGEF domain	Phypoly-transcript-08760	0.038	SM1
Phypoly-transcript-11829	3.43919e-30	0.920657	0.97	0.711	5.20005e-26	0	LPAI_ARATH	GO:0006629	2894	Phypoly-transcript-11829	0.259	SM1
Phypoly-transcript-04633	4.46582e-39	0.920343	0.99	0.876	6.75231e-35	0	WDR26_XENTR	GO:0005515|GO:0005515|GO:0005515|GO:0005515	LIS1 homology (LisH) motif profile.|WD domain, G-beta repeat|Trp-Asp (WD) repeats profile.|Trp-Asp (WD) repeats circular profile.	Phypoly-transcript-04633	0.114	SM1
Phypoly-transcript-09916	1.13109e-29	0.919976	0.964	0.737	1.71021e-25	0	ANK3_HUMAN	GO:0005515|GO:0005515	Ankyrin repeat profile.|Ankyrin repeat	Phypoly-transcript-09916	0.227	SM1
Phypoly-transcript-17007	3.11312e-21	0.91987	0.924	0.749	4.70703e-17	0	PERQ_SEDLI	GO:0016209|GO:0016491|GO:0055114	184	Phypoly-transcript-17007	0.175	SM1
Phypoly-transcript-15027	2.38924e-36	0.919819	0.975	0.798	3.61254e-32	0	noGene	GO:0005515	1611	Phypoly-transcript-15027	0.177	SM1
Phypoly-transcript-02822	7.73614e-28	0.919198	0.924	0.714	1.1697e-23	0	WEE1B_XENLA	GO:0004672|GO:0005524|GO:0006468|GO:0005524|GO:0004672|GO:0005524|GO:0006468|GO:0004674|GO:0006468	Protein kinase domain profile.|Protein kinases ATP-binding region signature.|Protein kinase domain|Serine/Threonine protein kinases active-site signature.	Phypoly-transcript-02822	0.21	SM1
Phypoly-transcript-09157	2.26596e-27	0.919092	0.929	0.679	3.42613e-23	0	BTBD9_HUMAN	GO:0005515|GO:0005515	BTB domain profile.|BTB/POZ domain	Phypoly-transcript-09157	0.25	SM1
Phypoly-transcript-07263	9.57173e-31	0.918702	0.949	0.737	1.44725e-26	0	CHMP7_DANRE	GO:0015031	4171	Phypoly-transcript-07263	0.212	SM1
Phypoly-transcript-03359	1.30601e-26	0.918389	0.949	0.702	1.97468e-22	0	GCY8E_DROME	GO:0006355|GO:0009190|GO:0016849|GO:0035556|GO:0009190|GO:0016849|GO:0035556	PAS fold|Guanylate cyclase domain profile.|Adenylate and Guanylate cyclase catalytic domain	Phypoly-transcript-03359	0.247	SM1
Phypoly-transcript-11349	2.29597e-30	0.918228	0.964	0.769	3.4715e-26	0	AGUA_MYCCT	GO:0004668|GO:0009446	3158	Phypoly-transcript-11349	0.195	SM1
Phypoly-transcript-20537	1.08512e-25	0.918141	0.959	0.725	1.6407e-21	0	UBCB_DICDI	GO:0016881|GO:0016881	Ubiquitin-conjugating enzymes family profile.|Ubiquitin-conjugating enzyme	Phypoly-transcript-20537	0.234	SM1
Phypoly-transcript-06837	3.03142e-36	0.917563	0.985	0.867	4.5835e-32	0	NHAAB_MONBE	GO:0003824|GO:0006807|GO:0046914|GO:0018822	Nitrile hydratase, alpha chain|Nitrile hydratase beta subunit	Phypoly-transcript-06837	0.118	SM1
Phypoly-transcript-07164	1.07751e-20	0.916839	0.848	0.549	1.62919e-16	0	RBBP5_MOUSE	GO:0005515|GO:0005515|GO:0005515	Trp-Asp (WD) repeats circular profile.|WD domain, G-beta repeat|Trp-Asp (WD) repeats profile.	Phypoly-transcript-07164	0.299	SM1
Phypoly-transcript-03548	1.58026e-32	0.915713	0.97	0.815	2.38935e-28	0	ZN143_BOVIN	GO:0046872|GO:0046872|GO:0005515	Zinc finger C2H2 type domain signature.|Zinc finger C2H2 type domain profile.|LIS1 homology (LisH) motif profile.	Phypoly-transcript-03548	0.155	SM1
Phypoly-transcript-01187	1.18111e-34	0.914797	0.975	0.887	1.78584e-30	0	TTL12_HUMAN	GO:0006464|GO:0006464	TTL domain profile.|Tubulin-tyrosine ligase family	Phypoly-transcript-01187	0.088	SM1
Phypoly-transcript-08560	1.5472e-26	0.914761	0.914	0.633	2.33937e-22	0	RUSD2_MOUSE	GO:0001522|GO:0003723|GO:0009451|GO:0009982|GO:0001522|GO:0003723|GO:0009451|GO:0009982	RNA pseudouridylate synthase|Rlu family of pseudouridine synthase signature.	Phypoly-transcript-08560	0.281	SM1
Phypoly-transcript-22265	1.74043e-24	0.912994	0.898	0.639	2.63153e-20	0	SAN_DROME	GO:0008080|GO:0008080	Gcn5-related N-acetyltransferase (GNAT) domain profile.|Acetyltransferase (GNAT) family	Phypoly-transcript-22265	0.259	SM1
Phypoly-transcript-11836	1.54222e-25	0.912451	0.898	0.59	2.33184e-21	0	CBPP_DICDI	GO:0005509|GO:0005509	EF-hand calcium-binding domain profile.|EF-hand domain pair	Phypoly-transcript-11836	0.308	SM1
Phypoly-transcript-08414	9.65275e-36	0.912417	0.975	0.795	1.4595e-31	0	PAO4_ARATH	GO:0016491|GO:0055114	1626	Phypoly-transcript-08414	0.18	SM1
Phypoly-transcript-21941	3.30409e-32	0.912355	0.975	0.74	4.99579e-28	0	MTPN_DICDI	GO:0005515	295	Phypoly-transcript-21941	0.235	SM1
Phypoly-transcript-15349	5.9566e-39	0.912154	0.98	0.772	9.00637e-35	0	STCC_EMENI	GO:0004601|GO:0004601	Peroxidase, family 2|Heme haloperoxidase family profile.	Phypoly-transcript-15349	0.208	SM1
Phypoly-transcript-16550	1.52273e-28	0.912062	0.929	0.676	2.30236e-24	0	BCP_BACSU	GO:0016209|GO:0016491|GO:0055114	184	Phypoly-transcript-16550	0.253	SM1
Phypoly-transcript-11873	6.02946e-33	0.911854	0.97	0.855	9.11655e-29	0	PRPSA_DICDI	GO:0000287|GO:0004749|GO:0009156|GO:0044249|GO:0000287|GO:0004749|GO:0009165	Phosphoribosyl pyrophosphate synthase signature.|Phosphoribosyl synthetase-associated domain	Phypoly-transcript-11873	0.115	SM1
Phypoly-transcript-13977	8.48073e-29	0.910891	0.904	0.607	1.28229e-24	0	YFJP_BACSU	GO:0006284	2052	Phypoly-transcript-13977	0.297	SM1
Phypoly-transcript-09065	4.08944e-25	0.910792	0.858	0.514	6.18324e-21	0	GLNA_LUPLU	GO:0004356|GO:0006807|GO:0004356|GO:0006542|GO:0006807	Glutamine synthetase, catalytic domain|Glutamine synthetase, beta-Grasp domain	Phypoly-transcript-09065	0.344	SM1
Phypoly-transcript-02384	1.04738e-26	0.910131	0.893	0.627	1.58364e-22	0	DNLI_HAEIN	GO:0003909|GO:0051103|GO:0003910|GO:0005524|GO:0006281|GO:0006310	ATP-dependent DNA ligase signature 2.|ATP dependent DNA ligase domain	Phypoly-transcript-02384	0.266	SM1
Phypoly-transcript-02916	3.59436e-23	0.909939	0.772	0.379	5.43468e-19	0	EFCB1_XENLA	GO:0005515	4661	Phypoly-transcript-02916	0.393	SM1
Phypoly-transcript-13314	1.6945e-27	0.909503	0.949	0.688	2.56209e-23	0	PTPA1_DICDI	GO:0019211	3079	Phypoly-transcript-13314	0.261	SM1
Phypoly-transcript-09675	4.08023e-39	0.909375	0.985	0.783	6.1693e-35	0	YPT1_PHYIN	GO:0005525|GO:0007264	3588	Phypoly-transcript-09675	0.202	SM1
Phypoly-transcript-16978	1.69826e-27	0.909201	0.914	0.65	2.56776e-23	0	TRMB_DICDI	GO:0006400|GO:0008176	3493	Phypoly-transcript-16978	0.264	SM1
Phypoly-transcript-09848	8.23168e-24	0.909125	0.909	0.688	1.24463e-19	0	GLPQ_BACSU	GO:0006071|GO:0008889	1826	Phypoly-transcript-09848	0.221	SM1
Phypoly-transcript-10494	1.05466e-28	0.908841	0.964	0.723	1.59465e-24	0	FADH_PSEAE	GO:0008270|GO:0016491|GO:0055114|GO:0016491|GO:0055114|GO:0008270|GO:0016491|GO:0055114	Zinc-containing alcohol dehydrogenases signature.|Alcohol dehydrogenase GroES-like domain|Zinc-binding dehydrogenase	Phypoly-transcript-10494	0.241	SM1
Phypoly-transcript-08532	2.66289e-36	0.908717	0.98	0.731	4.02629e-32	0	SYSC_DICDI	GO:0004812|GO:0006418|GO:0000166|GO:0004828|GO:0005524|GO:0005737|GO:0006434|GO:0000166|GO:0004812|GO:0005524|GO:0006418	Aminoacyl-transfer RNA synthetases class-II family profile.|Seryl-tRNA synthetase N-terminal domain|tRNA synthetase class II core domain (G, H, P, S and T)	Phypoly-transcript-08532	0.249	SM1
Phypoly-transcript-16742	4.47436e-31	0.908574	0.888	0.503	6.76524e-27	0	YG42_SCHPO	GO:0003677|GO:0005524|GO:0003676|GO:0004386|GO:0005524	SNF2 family N-terminal domain|Superfamilies 1 and 2 helicase C-terminal domain profile.	Phypoly-transcript-16742	0.385	SM1
Phypoly-transcript-12325	7.20292e-20	0.9075	0.888	0.659	1.08908e-15	0	ZDH15_XENLA	GO:0008270|GO:0008270	Zinc finger DHHC-type profile.|DHHC palmitoyltransferase	Phypoly-transcript-12325	0.229	SM1
Phypoly-transcript-10182	1.78759e-29	0.907285	0.939	0.702	2.70284e-25	0	VAC8_KLULA	GO:0005515	349	Phypoly-transcript-10182	0.237	SM1
Phypoly-transcript-06386	8.26539e-24	0.906521	0.888	0.581	1.24973e-19	0	RAC1_RAT	GO:0005525|GO:0007264|GO:0005515|GO:0005525|GO:0005622|GO:0007264	Ras family|F-box domain profile.|small GTPase Rho family profile.	Phypoly-transcript-06386	0.307	SM1
Phypoly-transcript-11573	4.16725e-28	0.906241	0.924	0.595	6.30088e-24	0	ANK2_MOUSE	GO:0005515|GO:0005515	Ankyrin repeat profile.|Ankyrin repeat	Phypoly-transcript-11573	0.329	SM1
Phypoly-transcript-12069	1.74945e-20	0.906072	0.893	0.63	2.64516e-16	0	YFMJ_BACSU	GO:0008270|GO:0016491|GO:0055114	5000	Phypoly-transcript-12069	0.263	SM1
Phypoly-transcript-11182	3.01261e-31	0.90477	0.98	0.734	4.55506e-27	0	TWF_DICDI	GO:0003779|GO:0005622|GO:0003779|GO:0005622	ADF-H domain profile.|Cofilin/tropomyosin-type actin-binding protein	Phypoly-transcript-11182	0.246	SM1
Phypoly-transcript-09762	3.71132e-32	0.904393	0.97	0.824	5.61152e-28	0	TBP_ACACA	GO:0003677|GO:0006352|GO:0003677|GO:0006352	Transcription factor TFIID repeat signature.|Transcription factor TFIID (or TATA-binding protein, TBP)	Phypoly-transcript-09762	0.146	SM1
Phypoly-transcript-00184	2.32486e-30	0.903942	0.99	0.922	3.51518e-26	0	HBLA_BACCE	GO:0009405|GO:0016020	451	Phypoly-transcript-00184	0.068	SM1
Phypoly-transcript-03658	2.32625e-34	0.903593	0.98	0.749	3.51729e-30	0	RLMD_NITOC	GO:0006396|GO:0008173|GO:0006396|GO:0008173|GO:0006396|GO:0008173	RNA methyltransferase trmA family signature 1.|tRNA (Uracil-5-)-methyltransferase|RNA methyltransferase trmA family signature 2.	Phypoly-transcript-03658	0.231	SM1
Phypoly-transcript-10393	5.77417e-24	0.902977	0.914	0.653	8.73055e-20	0	noGene	GO:0003676	3552	Phypoly-transcript-10393	0.261	SM1
Phypoly-transcript-04764	1.98246e-29	0.902912	0.954	0.827	2.99749e-25	0	GTPB1_RAT	GO:0005525|GO:0003924|GO:0005525|GO:0005525	Elongation factor Tu C-terminal domain|Elongation factor Tu GTP binding domain|Elongation factor Tu domain 2	Phypoly-transcript-04764	0.127	SM1
Phypoly-transcript-04538	6.84732e-32	0.902859	0.99	0.847	1.03531e-27	0	UBP27_ARATH	GO:0004221|GO:0006511|GO:0004221|GO:0006511|GO:0004221|GO:0006511|GO:0004221|GO:0006511	Ubiquitin carboxyl-terminal hydrolases family 2 signature 2.|Ubiquitin carboxyl-terminal hydrolases family 2 signature 1.|Ubiquitin carboxyl-terminal hydrolase|Ubiquitin carboxyl-terminal hydrolases family 2 profile.	Phypoly-transcript-04538	0.143	SM1
Phypoly-transcript-14136	2.47073e-19	0.902841	0.843	0.59	3.73574e-15	0	ZFAN1_MOUSE	GO:0008270|GO:0008270	Zinc finger AN1-type profile.|AN1-like Zinc finger	Phypoly-transcript-14136	0.253	SM1
Phypoly-transcript-07544	3.69599e-35	0.90276	0.97	0.777	5.58834e-31	0	Y2354_DICDI	GO:0004672|GO:0005524|GO:0006468|GO:0004672|GO:0005524|GO:0006468|GO:0005524	Protein kinase domain|Protein kinase domain profile.|Protein kinases ATP-binding region signature.	Phypoly-transcript-07544	0.193	SM1
Phypoly-transcript-10169	2.92763e-31	0.902352	0.949	0.714	4.42657e-27	0	APGM1_METTH	GO:0003824|GO:0046872|GO:0003824|GO:0046872	Metalloenzyme superfamily|2,3-bisphosphoglycerate-independent phosphoglycerate mutase	Phypoly-transcript-10169	0.235	SM1
Phypoly-transcript-09400	4.82235e-35	0.901558	0.98	0.853	7.2914e-31	0	CTDS1_HUMAN	GO:0005515|GO:0005515	FCP1 homology domain profile.|NLI interacting factor-like phosphatase	Phypoly-transcript-09400	0.127	SM1
Phypoly-transcript-17606	9.19678e-29	0.901195	0.975	0.763	1.39055e-24	0	CPAS1_DICDI	GO:0003924|GO:0005525|GO:0006184|GO:0007165|GO:0016020|GO:0005525|GO:0007264	small GTPase Ras family profile.|Ras family	Phypoly-transcript-17606	0.212	SM1
Phypoly-transcript-06000	7.50652e-20	0.900334	0.848	0.601	1.13499e-15	0	SGT2_USTMA	GO:0005515|GO:0005515|GO:0005515|GO:0005515|GO:0005515	SET domain profile.|TPR repeat profile.|Tetratricopeptide repeat|TPR repeat region circular profile.|SET domain	Phypoly-transcript-06000	0.247	SM1
Phypoly-transcript-01502	1.4213e-28	0.900265	0.97	0.884	2.149e-24	0	MANG_DICDI	GO:0006013|GO:0015923|GO:0004559|GO:0005975|GO:0004553|GO:0008270	Glycosyl hydrolases family 38 C-terminal domain|Glycosyl hydrolases family 38 N-terminal domain|Alpha mannosidase, middle domain	Phypoly-transcript-01502	0.086	SM1
Phypoly-transcript-16118	1.97342e-32	0.899997	0.975	0.72	2.98382e-28	0	CENPK_HUMAN	GO:0005634	710	Phypoly-transcript-16118	0.255	SM1
Phypoly-transcript-11897	5.95202e-30	0.899211	0.975	0.786	8.99945e-26	0	UBIE_GEOSM	GO:0008152|GO:0008168	2474	Phypoly-transcript-11897	0.189	SM1
Phypoly-transcript-02362	7.61088e-35	0.898871	0.985	0.89	1.15076e-30	0	YR831_MIMIV	GO:0004672|GO:0006468|GO:0009190|GO:0016849|GO:0035556|GO:0004674|GO:0006468|GO:0004672|GO:0005524|GO:0006468|GO:0005524|GO:0009190|GO:0016849|GO:0035556	Protein tyrosine kinase|Adenylate and Guanylate cyclase catalytic domain|Serine/Threonine protein kinases active-site signature.|Protein kinase domain profile.|Protein kinases ATP-binding region signature.|Guanylate cyclase domain profile.	Phypoly-transcript-02362	0.095	SM1
Phypoly-transcript-05363	1.76334e-31	0.897871	0.99	0.939	2.66617e-27	0	UVRAG_HUMAN	GO:0010508	4799	Phypoly-transcript-05363	0.051	SM1
Phypoly-transcript-02508	7.77163e-24	0.897312	0.873	0.584	1.17507e-19	0	PARP1_CRIGR	GO:0003950|GO:0003950|GO:0006471|GO:0003950|GO:0003950|GO:0006471	Poly(ADP-ribose) polymerase catalytic domain|Poly(ADP-ribose) polymerase, regulatory domain|PARP catalytic domain profile.|PARP alpha-helical domain profile.	Phypoly-transcript-02508	0.289	SM1
Phypoly-transcript-01654	4.91373e-34	0.897115	0.975	0.847	7.42956e-30	0	IVD_HUMAN	GO:0020037|GO:0020037|GO:0003995|GO:0055114|GO:0008152|GO:0016627|GO:0050660|GO:0055114|GO:0016627|GO:0055114	Cytochrome b5 family, heme-binding domain profile.|Cytochrome b5-like Heme/Steroid binding domain|Acyl-CoA dehydrogenase, middle domain|Acyl-CoA dehydrogenase, N-terminal domain|Acyl-CoA dehydrogenase, C-terminal domain	Phypoly-transcript-01654	0.128	SM1
Phypoly-transcript-02863	5.60391e-31	0.897036	0.985	0.945	8.47312e-27	0	STATC_DICDI	GO:0005515|GO:0005515	Src homology 2 (SH2) domain profile.|SH2 domain	Phypoly-transcript-02863	0.04	SM1
Phypoly-transcript-03329	1.01418e-29	0.896775	0.98	0.922	1.53344e-25	0	ACO1_AJECA	GO:0006629|GO:0020037|GO:0020037|GO:0020037|GO:0004768|GO:0005506|GO:0005783|GO:0006633|GO:0016020|GO:0055114	Fatty acid desaturase|Cytochrome b5 family, heme-binding domain signature.|Cytochrome b5 family, heme-binding domain profile.|Cytochrome b5-like Heme/Steroid binding domain|Fatty acid desaturases family 1 signature.	Phypoly-transcript-03329	0.058	SM1
Phypoly-transcript-05913	5.55667e-28	0.89675	0.949	0.751	8.40169e-24	0	noGene	GO:0003677|GO:0005634|GO:0006351|GO:0003677|GO:0005634|GO:0006351	TFIIS N-terminal domain profile.|TFIIS helical bundle-like domain	Phypoly-transcript-05913	0.198	SM1
Phypoly-transcript-02148	4.97441e-32	0.895661	0.98	0.896	7.5213e-28	0	Y5521_DICDI	GO:0005515|GO:0008270|GO:0046872|GO:0008270	Zinc finger RING-type profile.|Zinc finger, C3HC4 type (RING finger)|IBR domain	Phypoly-transcript-02148	0.084	SM1
Phypoly-transcript-11983	1.11588e-27	0.895447	0.97	0.731	1.68721e-23	0	noGene	GO:0004733|GO:0010181|GO:0055114	3529	Phypoly-transcript-11983	0.239	SM1
Phypoly-transcript-08058	1.23943e-36	0.89504	0.975	0.783	1.87403e-32	0	GLCM_MOUSE	GO:0004348|GO:0006665	2804	Phypoly-transcript-08058	0.192	SM1
Phypoly-transcript-12650	8.72361e-28	0.894782	0.964	0.746	1.31901e-23	0	RBM48_DANRE	GO:0003676	1497	Phypoly-transcript-12650	0.218	SM1
Phypoly-transcript-00925	8.70477e-39	0.894649	0.812	0.199	1.31616e-34	0	ASPM_FELCA	GO:0005515|GO:0005515|GO:0005515|GO:0005515	IQ motif profile.|Calponin homology domain profile.|Calponin homology (CH) domain|IQ calmodulin-binding motif	Phypoly-transcript-00925	0.613	SM1
Phypoly-transcript-29600	1.11413e-27	0.894607	0.97	0.714	1.68457e-23	0	ATOX1_DICDI	GO:0030001|GO:0046872|GO:0030001|GO:0046872	Heavy-metal-associated domain|Heavy-metal-associated domain profile.	Phypoly-transcript-29600	0.256	SM1
Phypoly-transcript-01318	6.29702e-32	0.894291	0.959	0.809	9.5211e-28	0	UBP37_HUMAN	GO:0004221|GO:0006511|GO:0004221|GO:0006511|GO:0004221|GO:0006511	Ubiquitin carboxyl-terminal hydrolases family 2 signature 2.|Ubiquitin carboxyl-terminal hydrolases family 2 profile.|Ubiquitin carboxyl-terminal hydrolase	Phypoly-transcript-01318	0.15	SM1
Phypoly-transcript-10657	1.19272e-33	0.893918	0.975	0.757	1.80339e-29	0	DST4_DICDI	GO:0004672|GO:0005524|GO:0006468|GO:0004672|GO:0005524|GO:0006468|GO:0005524|GO:0004674|GO:0006468	Protein kinase domain profile.|Protein kinase domain|Protein kinases ATP-binding region signature.|Serine/Threonine protein kinases active-site signature.	Phypoly-transcript-10657	0.218	SM1
Phypoly-transcript-12156	6.63738e-23	0.893292	0.883	0.532	1.00357e-18	0	YY46_NOSS1	GO:0005515|GO:0005515|GO:0005515	Trp-Asp (WD) repeats profile.|Trp-Asp (WD) repeats circular profile.|WD domain, G-beta repeat	Phypoly-transcript-12156	0.351	SM1
Phypoly-transcript-09471	7.60901e-31	0.89207	0.98	0.699	1.15048e-26	0	DNAJ_CALS8	GO:0031072|GO:0051082|GO:0031072|GO:0051082	Zinc finger CR-type profile.|DnaJ central domain	Phypoly-transcript-09471	0.281	SM1
Phypoly-transcript-12079	1.46389e-29	0.891896	0.959	0.737	2.2134e-25	0	PRMC_RHORT	GO:0003676|GO:0008168|GO:0032259	2624	Phypoly-transcript-12079	0.222	SM1
Phypoly-transcript-05241	1.44109e-29	0.891831	0.954	0.746	2.17893e-25	0	PPA20_ARATH	GO:0016787	597	Phypoly-transcript-05241	0.208	SM1
Phypoly-transcript-25733	6.32071e-24	0.891739	0.939	0.673	9.55691e-20	0	PFD5_DICDI	GO:0006457|GO:0016272|GO:0051082	3208	Phypoly-transcript-25733	0.266	SM1
Phypoly-transcript-19085	8.96136e-34	0.891582	0.97	0.743	1.35496e-29	0	TMEDB_DICDI	GO:0006810|GO:0016021|GO:0006810|GO:0016021	emp24/gp25L/p24 family/GOLD|GOLD domain profile.	Phypoly-transcript-19085	0.227	SM1
Phypoly-transcript-06297	6.24314e-29	0.891448	0.97	0.809	9.43963e-25	0	RS15_NITSB	GO:0003735|GO:0005622|GO:0005840|GO:0006412	3795	Phypoly-transcript-06297	0.161	SM1
Phypoly-transcript-08638	6.59946e-23	0.891372	0.766	0.39	9.97838e-19	0	FBXW7_HUMAN	GO:0005515|GO:0005515|GO:0005515|GO:0005515	Trp-Asp (WD) repeats profile.|F-box domain profile.|WD domain, G-beta repeat|Trp-Asp (WD) repeats circular profile.	Phypoly-transcript-08638	0.376	SM1
Phypoly-transcript-03821	5.13567e-28	0.891258	0.97	0.902	7.76514e-24	0	UBP3_ARATH	GO:0004221|GO:0006511|GO:0004221|GO:0006511|GO:0004221|GO:0006511|GO:0004221|GO:0006511	Ubiquitin carboxyl-terminal hydrolases family 2 signature 1.|Ubiquitin carboxyl-terminal hydrolases family 2 signature 2.|Ubiquitin carboxyl-terminal hydrolase|Ubiquitin carboxyl-terminal hydrolases family 2 profile.	Phypoly-transcript-03821	0.068	SM1
Phypoly-transcript-06532	1.73316e-32	0.890906	0.98	0.835	2.62053e-28	0	RHLG_PSEAE	GO:0008152|GO:0016491	4110	Phypoly-transcript-06532	0.145	SM1
Phypoly-transcript-12869	6.05941e-31	0.890558	0.964	0.801	9.16184e-27	0	noGene	GO:0006807|GO:0016810|GO:0006807|GO:0016810	Carbon-nitrogen hydrolase domain profile.|Carbon-nitrogen hydrolase	Phypoly-transcript-12869	0.163	SM1
Phypoly-transcript-01460	1.11178e-28	0.890494	0.939	0.775	1.68101e-24	0	DNLI_HAEIN	GO:0003910|GO:0005524|GO:0006281|GO:0006310|GO:0003910|GO:0005524|GO:0006281|GO:0006310|GO:0003909|GO:0051103	ATP dependent DNA ligase domain|ATP-dependent DNA ligase family profile.|ATP-dependent DNA ligase signature 2.	Phypoly-transcript-01460	0.164	SM1
Phypoly-transcript-02112	4.62415e-28	0.890245	0.944	0.676	6.99172e-24	0	RAP1B_DANRE	GO:0005622|GO:0008270|GO:0005525|GO:0007264|GO:0004672|GO:0005524|GO:0006468|GO:0003924|GO:0005525|GO:0006184|GO:0007165|GO:0016020|GO:0004672|GO:0005524|GO:0006468	Zinc finger B-box type profile.|Ras family|Protein kinase domain profile.|small GTPase Ras family profile.|Protein kinase domain	Phypoly-transcript-02112	0.268	SM1
Phypoly-transcript-02220	8.35935e-28	0.88969	0.868	0.486	1.26393e-23	0	GSK3_DICDI	GO:0004674|GO:0006468|GO:0004672|GO:0005524|GO:0006468|GO:0004672|GO:0005524|GO:0006468	Serine/Threonine protein kinases active-site signature.|Protein kinase domain|Protein kinase domain profile.	Phypoly-transcript-02220	0.382	SM1
Phypoly-transcript-24590	2.00348e-23	0.889321	0.888	0.584	3.02926e-19	0	SPCS1_DICDI	GO:0005787|GO:0006465|GO:0008233|GO:0016021	2485	Phypoly-transcript-24590	0.304	SM1
Phypoly-transcript-14210	8.7563e-42	0.888968	0.975	0.737	1.32395e-37	0	APO1_COPRA	GO:0004601|GO:0004601	Peroxidase, family 2|Heme haloperoxidase family profile.	Phypoly-transcript-14210	0.238	SM1
Phypoly-transcript-10603	3.98129e-25	0.888941	0.934	0.673	6.01971e-21	0	noGene	GO:0005515	4187	Phypoly-transcript-10603	0.261	SM1
Phypoly-transcript-14200	5.11425e-28	0.888808	0.97	0.795	7.73274e-24	0	CACL1_MOUSE	GO:0006511|GO:0031461|GO:0031625	907	Phypoly-transcript-14200	0.175	SM1
Phypoly-transcript-04665	5.96575e-34	0.888497	0.98	0.902	9.02022e-30	0	GLO2_DANRE	GO:0003735|GO:0005622|GO:0005840|GO:0006412	3739	Phypoly-transcript-04665	0.078	SM1
Phypoly-transcript-10513	4.35834e-28	0.888341	0.939	0.665	6.58981e-24	0	SOX_BOVIN	GO:0016491|GO:0055114	1543	Phypoly-transcript-10513	0.274	SM1
Phypoly-transcript-03949	1.63521e-34	0.886625	0.98	0.864	2.47244e-30	0	NDRA_DICDI	GO:0004672|GO:0005524|GO:0006468|GO:0005524|GO:0004674|GO:0005524|GO:0006468|GO:0004672|GO:0005524|GO:0006468|GO:0004674|GO:0005524|GO:0006468|GO:0004674|GO:0006468	Protein kinase domain profile.|Protein kinases ATP-binding region signature.|AGC-kinase C-terminal domain profile.|Protein kinase domain|Protein kinase C terminal domain|Serine/Threonine protein kinases active-site signature.	Phypoly-transcript-03949	0.116	SM1
Phypoly-transcript-15243	5.51002e-35	0.886029	0.975	0.786	8.33116e-31	0	ARI4_ARATH	GO:0008270|GO:0005515|GO:0008270	IBR domain|Zinc finger RING-type profile.	Phypoly-transcript-15243	0.189	SM1
Phypoly-transcript-10526	6.69086e-31	0.885146	0.975	0.827	1.01166e-26	0	CALM_TRYCR	GO:0005509|GO:0005509	EF-hand calcium-binding domain profile.|EF-hand domain pair	Phypoly-transcript-10526	0.148	SM1
Phypoly-transcript-03571	5.34789e-27	0.884953	0.934	0.746	8.08601e-23	0	KLH28_MOUSE	GO:0005515|GO:0005515	BTB domain profile.|BTB/POZ domain	Phypoly-transcript-03571	0.188	SM1
Phypoly-transcript-00201	1.26815e-31	0.884838	0.99	0.991	1.91744e-27	0	VPS52_CANFA	GO:0005524|GO:0016301|GO:0016310	3541	Phypoly-transcript-00201	-0.001	SM1
Phypoly-transcript-07260	2.94165e-22	0.884296	0.929	0.688	4.44778e-18	0	FBX11_RAT	GO:0004842|GO:0008270|GO:0005515|GO:0004842|GO:0008270	Putative zinc finger in N-recognin (UBR box)|F-box domain profile.|Zinc finger UBR-type profile.	Phypoly-transcript-07260	0.241	SM1
Phypoly-transcript-07777	2.14635e-34	0.88343	0.97	0.821	3.24529e-30	0	noGene	GO:0003950	3137	Phypoly-transcript-07777	0.149	SM1
Phypoly-transcript-06243	6.26865e-26	0.883245	0.939	0.728	9.4782e-22	0	GSK3_DICDI	GO:0004672|GO:0005524|GO:0006468|GO:0004672|GO:0005524|GO:0006468|GO:0004674|GO:0006468|GO:0005524	Protein kinase domain profile.|Protein kinase domain|Serine/Threonine protein kinases active-site signature.|Protein kinases ATP-binding region signature.	Phypoly-transcript-06243	0.211	SM1
Phypoly-transcript-05603	1.18561e-36	0.882103	0.97	0.855	1.79265e-32	0	ACDA_BACSU	GO:0016627|GO:0055114|GO:0003995|GO:0055114|GO:0020037|GO:0008152|GO:0016627|GO:0050660|GO:0055114|GO:0020037	Acyl-CoA dehydrogenase, C-terminal domain|Acyl-CoA dehydrogenase, middle domain|Cytochrome b5 family, heme-binding domain profile.|Acyl-CoA dehydrogenase, N-terminal domain|Cytochrome b5-like Heme/Steroid binding domain	Phypoly-transcript-05603	0.115	SM1
Phypoly-transcript-02527	2.4543e-28	0.881771	0.929	0.699	3.7109e-24	0	EPSJ_BACSU	GO:0009058	1897	Phypoly-transcript-02527	0.23	SM1
Phypoly-transcript-07742	5.27468e-33	0.880486	0.97	0.829	7.97532e-29	0	Y2070_DICDI	GO:0005524|GO:0004672|GO:0005524|GO:0006468|GO:0004674|GO:0006468|GO:0004674|GO:0005524|GO:0006468|GO:0004672|GO:0005524|GO:0006468|GO:0004674|GO:0005524|GO:0006468	Protein kinases ATP-binding region signature.|Protein kinase domain profile.|Serine/Threonine protein kinases active-site signature.|AGC-kinase C-terminal domain profile.|Protein kinase domain|Protein kinase C terminal domain	Phypoly-transcript-07742	0.141	SM1
Phypoly-transcript-01889	5.82033e-35	0.880387	0.975	0.896	8.80034e-31	0	CUL3_DICDI	GO:0006511|GO:0031461|GO:0031625|GO:0006511|GO:0031461|GO:0031625|GO:0006511|GO:0031461|GO:0031625	Cullin family profile.|Cullin family|Cullin protein neddylation domain	Phypoly-transcript-01889	0.079	SM1
Phypoly-transcript-13706	6.04654e-25	0.880259	0.883	0.517	9.14236e-21	0	SWET1_MOUSE	GO:0016021	4276	Phypoly-transcript-13706	0.366	SM1
Phypoly-transcript-29008	3.82818e-21	0.880233	0.843	0.517	5.78822e-17	0	noGene	GO:0003924|GO:0005525	3422	Phypoly-transcript-29008	0.326	SM1
Phypoly-transcript-04058	5.65435e-32	0.879995	0.97	0.806	8.54937e-28	0	RPC3_DICDI	GO:0003677|GO:0003899|GO:0006351	3900	Phypoly-transcript-04058	0.164	SM1
Phypoly-transcript-03810	3.36892e-30	0.879528	0.975	0.829	5.09381e-26	0	SAC1_XENLA	GO:0042578|GO:0042578	SacI homology domain|Sac phosphatase domain profile.	Phypoly-transcript-03810	0.146	SM1
Phypoly-transcript-20915	2.27082e-30	0.879432	0.975	0.795	3.43348e-26	0	noGene	GO:0006812|GO:0008324|GO:0016021|GO:0055085	667	Phypoly-transcript-20915	0.18	SM1
Phypoly-transcript-09944	4.26182e-24	0.879229	0.929	0.714	6.44387e-20	0	PEX2_DICDI	GO:0005515|GO:0008270	4982	Phypoly-transcript-09944	0.215	SM1
Phypoly-transcript-10258	1.68331e-25	0.879078	0.893	0.578	2.54517e-21	0	DR111_ARATH	GO:0003676|GO:0003676	G-patch domain profile.|G-patch domain	Phypoly-transcript-10258	0.315	SM1
Phypoly-transcript-26413	6.66414e-18	0.879035	0.797	0.46	1.00762e-13	0	NC2B_DICDI	GO:0005622|GO:0043565	2084	Phypoly-transcript-26413	0.337	SM1
Phypoly-transcript-16504	2.64638e-27	0.878678	0.949	0.697	4.00133e-23	0	GST2_SCHPO	GO:0005515|GO:0005515	Glutathione S-transferase, N-terminal domain|Soluble glutathione S-transferase N-terminal domain profile.	Phypoly-transcript-16504	0.252	SM1
Phypoly-transcript-00728	5.10744e-29	0.878209	0.975	0.896	7.72245e-25	0	UBP47_XENLA	GO:0004221|GO:0006511|GO:0004221|GO:0006511|GO:0004221|GO:0006511|GO:0004221|GO:0006511	Ubiquitin carboxyl-terminal hydrolases family 2 profile.|Ubiquitin carboxyl-terminal hydrolases family 2 signature 1.|Ubiquitin carboxyl-terminal hydrolase|Ubiquitin carboxyl-terminal hydrolases family 2 signature 2.	Phypoly-transcript-00728	0.079	SM1
Phypoly-transcript-31663	2.96007e-30	0.878179	0.964	0.708	4.47563e-26	0	SH3L2_BOVIN	GO:0009055|GO:0015035|GO:0045454	1815	Phypoly-transcript-31663	0.256	SM1
Phypoly-transcript-04246	1.23821e-26	0.878139	0.919	0.572	1.87218e-22	0	KCND1_HUMAN	GO:0005515|GO:0016491|GO:0016706|GO:0055114|GO:0051260|GO:0016491|GO:0016706|GO:0055114	BTB domain profile.|Fe(2+) 2-oxoglutarate dioxygenase domain profile.|BTB/POZ domain|2OG-Fe(II) oxygenase superfamily	Phypoly-transcript-04246	0.347	SM1
Phypoly-transcript-00604	1.47254e-33	0.877853	0.97	0.832	2.22648e-29	0	P_PIG	GO:0016021|GO:0055085	782	Phypoly-transcript-00604	0.138	SM1
Phypoly-transcript-05563	6.825e-31	0.877625	0.97	0.723	1.03194e-26	0	GBP5_HUMAN	GO:0003924|GO:0005525|GO:0003924|GO:0005525	Guanylate-binding protein, N-terminal domain|Guanylate-binding protein, C-terminal domain	Phypoly-transcript-05563	0.247	SM1
Phypoly-transcript-00822	6.2741e-33	0.877369	0.985	0.867	9.48644e-29	0	UBP48_CHICK	GO:0004221|GO:0006511|GO:0004221|GO:0005515|GO:0004221|GO:0006511|GO:0004221|GO:0006511|GO:0005515|GO:0004221|GO:0006511	Ubiquitin carboxyl-terminal hydrolases family 2 profile.|DUSP domain profile.|Ubiquitin domain profile.|Ubiquitin carboxyl-terminal hydrolase|Ubiquitin carboxyl-terminal hydrolases family 2 signature 2.|Ubiquitin family|Ubiquitin carboxyl-terminal hydrolases family 2 signature 1.	Phypoly-transcript-00822	0.118	SM1
Phypoly-transcript-12747	2.83978e-30	0.87646	0.959	0.665	4.29375e-26	0	P4H_MIMIV	GO:0016491|GO:0016706|GO:0055114|GO:0016491|GO:0016706|GO:0055114	2OG-Fe(II) oxygenase superfamily|Fe(2+) 2-oxoglutarate dioxygenase domain profile.	Phypoly-transcript-12747	0.294	SM1
Phypoly-transcript-07208	2.58689e-29	0.875271	0.959	0.708	3.91137e-25	0	noGene	GO:0003824	3081	Phypoly-transcript-07208	0.251	SM1
Phypoly-transcript-02127	9.03197e-32	0.875233	0.99	0.922	1.36563e-27	0	YL615_MIMIV	GO:0016773|GO:0016773|GO:0016773|GO:0046872|GO:0006511	Phosphatidylinositol 3- and 4-kinase|Phosphatidylinositol 3- and 4-kinases signature 2.|Phosphatidylinositol 3- and 4-kinases family profile.|FYVE zinc finger|Skp1 family, dimerisation domain	Phypoly-transcript-02127	0.068	SM1
Phypoly-transcript-03579	3.28044e-37	0.874991	0.98	0.809	4.96003e-33	0	PRPC_SALTY	GO:0044262|GO:0046912|GO:0006099|GO:0046912	Citrate synthase|Citrate synthase signature.	Phypoly-transcript-03579	0.171	SM1
Phypoly-transcript-10210	3.87381e-41	0.874384	0.98	0.76	5.85721e-37	0	METB_HELPX	GO:0030170	935	Phypoly-transcript-10210	0.22	SM1
Phypoly-transcript-23533	7.80094e-18	0.874338	0.675	0.332	1.1795e-13	0	UXT_DICDI	GO:0006457|GO:0016272|GO:0051082	3208	Phypoly-transcript-23533	0.343	SM1
Phypoly-transcript-09564	1.319e-23	0.874083	0.944	0.691	1.99432e-19	0	POMT2_MOUSE	GO:0016020|GO:0016020	MIR domain profile.|MIR domain	Phypoly-transcript-09564	0.253	SM1
Phypoly-transcript-03819	2.9168e-25	0.874051	0.934	0.746	4.4102e-21	0	DNLI_HAEIN	GO:0003909|GO:0051103|GO:0003910|GO:0005524|GO:0006281|GO:0006310	ATP-dependent DNA ligase signature 2.|ATP dependent DNA ligase domain	Phypoly-transcript-03819	0.188	SM1
Phypoly-transcript-06878	5.16455e-22	0.873564	0.873	0.61	7.80879e-18	0	MAEL_XENTR	GO:0003676|GO:0003676	RNA recognition motif. (a.k.a. RRM, RBD, or RNP domain)|Eukaryotic RNA Recognition Motif (RRM) profile.	Phypoly-transcript-06878	0.263	SM1
Phypoly-transcript-04595	1.84467e-29	0.87303	0.97	0.835	2.78914e-25	0	noGene	GO:0003779|GO:0017048|GO:0030036	1064	Phypoly-transcript-04595	0.135	SM1
Phypoly-transcript-18082	7.9163e-29	0.872774	0.97	0.78	1.19694e-24	0	CHMP3_DICDI	GO:0015031	4171	Phypoly-transcript-18082	0.19	SM1
Phypoly-transcript-05855	9.26628e-33	0.872772	0.99	0.812	1.40106e-28	0	GBP4_MOUSE	GO:0003924|GO:0005525	1972	Phypoly-transcript-05855	0.178	SM1
Phypoly-transcript-08728	2.90081e-23	0.87239	0.924	0.798	4.38602e-19	0	YWBD_BACSU	GO:0008168	3987	Phypoly-transcript-08728	0.126	SM1
Phypoly-transcript-11439	3.54428e-21	0.872365	0.863	0.659	5.35895e-17	0	UBIG_AGRT5	GO:0008152|GO:0008168	2474	Phypoly-transcript-11439	0.204	SM1
Phypoly-transcript-07627	4.12163e-28	0.871859	0.98	0.783	6.23191e-24	0	PSD3_SCHPO	GO:0004609|GO:0008654	3023	Phypoly-transcript-07627	0.197	SM1
Phypoly-transcript-12236	1.95952e-33	0.871644	0.985	0.832	2.9628e-29	0	PP2C1_SCHPO	GO:0003824|GO:0004722|GO:0006470	Protein phosphatase 2C|Protein phosphatase 2C signature.	Phypoly-transcript-12236	0.153	SM1
Phypoly-transcript-19525	1.99235e-28	0.871499	0.985	0.803	3.01244e-24	0	MYLKA_DICDI	GO:0004672|GO:0005524|GO:0006468|GO:0004672|GO:0005524|GO:0006468	Protein kinase domain|Protein kinase domain profile.	Phypoly-transcript-19525	0.182	SM1
Phypoly-transcript-10184	1.60572e-21	0.871242	0.883	0.633	2.42785e-17	0	noGene	GO:0006629	1571	Phypoly-transcript-10184	0.25	SM1
Phypoly-transcript-07407	1.3505e-21	0.871054	0.873	0.61	2.04196e-17	0	AMPL_DICDI	GO:0004177|GO:0005622|GO:0006508|GO:0004177|GO:0005622|GO:0006508|GO:0004177|GO:0005622|GO:0006508	Cytosol aminopeptidase family, catalytic domain|Cytosol aminopeptidase signature.|Cytosol aminopeptidase family, N-terminal domain	Phypoly-transcript-07407	0.263	SM1
Phypoly-transcript-05711	3.27192e-29	0.870993	0.843	0.382	4.94714e-25	0	DNLI_HAEIN	GO:0003910|GO:0005524|GO:0006281|GO:0006310	383	Phypoly-transcript-05711	0.461	SM1
Phypoly-transcript-00624	5.32126e-33	0.870857	0.97	0.824	8.04574e-29	0	MYBH_DICDI	GO:0005515|GO:0003682|GO:0005515	SWIRM domain profile.|Myb-like DNA-binding domain|SWIRM domain	Phypoly-transcript-00624	0.146	SM1
Phypoly-transcript-20860	1.47445e-17	0.870721	0.751	0.445	2.22937e-13	0	ASPGA_ARATH	GO:0016787	363	Phypoly-transcript-20860	0.306	SM1
Phypoly-transcript-06088	1.09079e-30	0.870685	0.975	0.691	1.64928e-26	0	FBXW7_DROME	GO:0005515|GO:0005515|GO:0051260|GO:0005515	Trp-Asp (WD) repeats profile.|Trp-Asp (WD) repeats circular profile.|BTB/POZ domain|WD domain, G-beta repeat	Phypoly-transcript-06088	0.284	SM1
Phypoly-transcript-06200	1.18562e-23	0.870157	0.914	0.63	1.79266e-19	0	UFOG4_MANES	GO:0008152|GO:0016758|GO:0008152|GO:0016758	UDP-glucoronosyl and UDP-glucosyl transferase|UDP-glycosyltransferases signature.	Phypoly-transcript-06200	0.284	SM1
Phypoly-transcript-25387	0.000186324	0.869567	0.193	0.09	1	0	noGene	GO:0007010|GO:0008017	2609	Phypoly-transcript-25387	0.103	SM1
Phypoly-transcript-00892	2.06667e-33	0.868701	0.975	0.936	3.1248e-29	0	ULK3_HUMAN	GO:0004674|GO:0006468|GO:0004672|GO:0005524|GO:0006468|GO:0005524|GO:0004672|GO:0005524|GO:0006468	Serine/Threonine protein kinases active-site signature.|Protein kinase domain|Protein kinases ATP-binding region signature.|Protein kinase domain profile.	Phypoly-transcript-00892	0.039	SM1
Phypoly-transcript-05352	7.84095e-33	0.868512	0.975	0.85	1.18555e-28	0	FBXW7_HUMAN	GO:0005515|GO:0005515|GO:0005515|GO:0005515	Trp-Asp (WD) repeats profile.|Trp-Asp (WD) repeats circular profile.|WD domain, G-beta repeat|F-box domain profile.	Phypoly-transcript-05352	0.125	SM1
Phypoly-transcript-05377	1.42829e-29	0.868325	0.98	0.824	2.15958e-25	0	YOL4_SCHPO	GO:0008152|GO:0016746	145	Phypoly-transcript-05377	0.156	SM1
Phypoly-transcript-05723	4.59844e-25	0.868172	0.914	0.65	6.95284e-21	0	Y0019_DICDI	GO:0005515|GO:0005515|GO:0004672|GO:0006468|GO:0005524|GO:0004672|GO:0005524|GO:0006468|GO:0004713|GO:0006468	F-box domain profile.|Ankyrin repeat profile.|Protein tyrosine kinase|Protein kinases ATP-binding region signature.|Protein kinase domain profile.|Tyrosine protein kinases specific active-site signature.	Phypoly-transcript-05723	0.264	SM1
Phypoly-transcript-16293	7.49768e-28	0.867951	0.934	0.734	1.13365e-23	0	TUP1_DICDI	GO:0005515|GO:0005515|GO:0005515	Trp-Asp (WD) repeats profile.|Trp-Asp (WD) repeats circular profile.|WD domain, G-beta repeat	Phypoly-transcript-16293	0.2	SM1
Phypoly-transcript-12929	6.80953e-21	0.86734	0.711	0.321	1.0296e-16	0	GALM_BOVIN	GO:0005975|GO:0016853	210	Phypoly-transcript-12929	0.39	SM1
Phypoly-transcript-10819	2.05663e-21	0.867336	0.878	0.676	3.10962e-17	0	HIBCH_XENLA	GO:0003824|GO:0008152	1436	Phypoly-transcript-10819	0.202	SM1
Phypoly-transcript-03099	2.89666e-23	0.866377	0.832	0.445	4.37975e-19	0	YAY3_SCHPO	GO:0004553|GO:0005976	1863	Phypoly-transcript-03099	0.387	SM1
Phypoly-transcript-07147	1.21114e-28	0.866339	0.964	0.792	1.83125e-24	0	UN933_ARATH	GO:0016021|GO:0055085	2392	Phypoly-transcript-07147	0.172	SM1
Phypoly-transcript-01599	4.84632e-32	0.866062	1	0.991	7.32763e-28	0	RBBP6_MOUSE	GO:0006886|GO:0008536|GO:0006886|GO:0008536|GO:0006886	Importin-beta N-terminal domain|Importin-beta N-terminal domain profile.|Cse1	Phypoly-transcript-01599	0.009	SM1
Phypoly-transcript-13475	2.92255e-17	0.865604	0.858	0.627	4.41889e-13	0	SPEE_VIBVY	GO:0003824	4202	Phypoly-transcript-13475	0.231	SM1
Phypoly-transcript-03689	1.45026e-30	0.86556	0.98	0.844	2.19279e-26	0	Y1055_METJA	GO:0003824|GO:0044237|GO:0050662	2657	Phypoly-transcript-03689	0.136	SM1
Phypoly-transcript-06882	1.42447e-31	0.865546	0.98	0.783	2.1538e-27	0	RANB9_XENTR	GO:0005515|GO:0005515	LIS1 homology (LisH) motif profile.|SPRY domain	Phypoly-transcript-06882	0.197	SM1
Phypoly-transcript-04344	2.41929e-29	0.864535	0.959	0.795	3.65796e-25	0	TM10A_RAT	GO:0005515|GO:0005515	NLI interacting factor-like phosphatase|FCP1 homology domain profile.	Phypoly-transcript-04344	0.164	SM1
Phypoly-transcript-03488	5.22359e-31	0.864446	0.944	0.746	7.89807e-27	0	DNLI_HAEIN	GO:0003910|GO:0005524|GO:0006281|GO:0006310	383	Phypoly-transcript-03488	0.198	SM1
Phypoly-transcript-02596	4.3082e-36	0.864281	0.975	0.832	6.514e-32	0	VAC8_ASHGO	GO:0005515|GO:0005515|GO:0006886|GO:0016192|GO:0030117	Armadillo/beta-catenin-like repeat|Armadillo/plakoglobin ARM repeat profile.|Adaptin N terminal region	Phypoly-transcript-02596	0.143	SM1
Phypoly-transcript-01962	1.01149e-23	0.864118	0.959	0.844	1.52937e-19	0	VPS54_DROME	GO:0042147	4858	Phypoly-transcript-01962	0.115	SM1
Phypoly-transcript-08351	4.95476e-36	0.863491	0.99	0.887	7.4916e-32	0	OAS3_HUMAN	GO:0003723|GO:0005524|GO:0006955|GO:0016740|GO:0016779	2'-5'-oligoadenylate synthase N-terminal region profile.|Nucleotidyltransferase domain	Phypoly-transcript-08351	0.103	SM1
Phypoly-transcript-12216	9.25287e-36	0.861805	0.949	0.546	1.39903e-31	0	NHLC2_BOVIN	GO:0005515	2703	Phypoly-transcript-12216	0.403	SM1
Phypoly-transcript-13909	2.1125e-23	0.86145	0.934	0.717	3.1941e-19	0	MAT2B_BOVIN	GO:0008831|GO:0045226	3874	Phypoly-transcript-13909	0.217	SM1
Phypoly-transcript-04667	3.65832e-32	0.861333	0.985	0.916	5.53138e-28	0	TPTE2_MACFA	GO:0005216|GO:0006811|GO:0016020|GO:0055085|GO:0005515|GO:0005515|GO:0005515|GO:0006470|GO:0008138|GO:0004725|GO:0016311|GO:0016791	Ion transport protein|C2 tensin-type domain profile.|C2 domain of PTEN tumour-suppressor protein|Phosphatase tensin-type domain profile.|Dual specificity phosphatase, catalytic domain|Tyrosine specific protein phosphatases active site.	Phypoly-transcript-04667	0.069	SM1
Phypoly-transcript-05300	3.41175e-28	0.861187	0.858	0.468	5.15857e-24	0	ANK1_HUMAN	GO:0005515	295	Phypoly-transcript-05300	0.39	SM1
Phypoly-transcript-20369	2.37446e-19	0.861049	0.736	0.39	3.59018e-15	0	NUD23_ARATH	GO:0016787|GO:0016787|GO:0016787	Nudix box signature.|Nudix hydrolase domain profile.|NUDIX domain	Phypoly-transcript-20369	0.346	SM1
Phypoly-transcript-12413	3.55588e-43	0.861024	0.98	0.766	5.3765e-39	0	IF4E_DICDI	GO:0003723|GO:0003743|GO:0005737|GO:0006413	1479	Phypoly-transcript-12413	0.214	SM1
Phypoly-transcript-03197	1.03918e-26	0.860931	0.959	0.746	1.57124e-22	0	APBLA_ARATH	GO:0006886|GO:0016192|GO:0030131|GO:0006886|GO:0016192|GO:0030117	Beta2-adaptin appendage, C-terminal sub-domain|Adaptin N terminal region	Phypoly-transcript-03197	0.213	SM1
Phypoly-transcript-05439	5.10574e-27	0.860846	0.909	0.578	7.71987e-23	0	GNO_GLUOX	GO:0005515|GO:0008270|GO:0008270	Ankyrin repeat profile.|DHHC palmitoyltransferase|Zinc finger DHHC-type profile.	Phypoly-transcript-05439	0.331	SM1
Phypoly-transcript-02857	1.75186e-23	0.860812	0.893	0.694	2.64882e-19	0	TSUA_DICDI	GO:0004672|GO:0005524|GO:0006468|GO:0004672|GO:0005524|GO:0006468	Protein kinase domain profile.|Protein kinase domain	Phypoly-transcript-02857	0.199	SM1
Phypoly-transcript-17831	5.99796e-16	0.860512	0.736	0.419	9.06892e-12	0	SPT17_HUMAN	GO:0005515|GO:0005515	IQ calmodulin-binding motif|IQ motif profile.	Phypoly-transcript-17831	0.317	SM1
Phypoly-transcript-02829	5.35009e-24	0.860254	0.939	0.743	8.08934e-20	0	TRI59_CHICK	GO:0005622|GO:0008270|GO:0005515|GO:0008270	B-box zinc finger|Zinc finger RING-type profile.	Phypoly-transcript-02829	0.196	SM1
Phypoly-transcript-04231	1.23459e-26	0.860168	0.807	0.422	1.86669e-22	0	ABAP1_ARATH	GO:0002161|GO:0005515|GO:0005515	Aminoacyl-tRNA editing domain|BTB/POZ domain|BTB domain profile.	Phypoly-transcript-04231	0.385	SM1
Phypoly-transcript-04043	1.29752e-28	0.859218	0.975	0.806	1.96185e-24	0	KAPC_DICDI	GO:0004674|GO:0005524|GO:0006468|GO:0004672|GO:0005524|GO:0006468|GO:0004672|GO:0005524|GO:0006468|GO:0005524|GO:0004674|GO:0006468	AGC-kinase C-terminal domain profile.|Protein kinase domain|Protein kinase domain profile.|Protein kinases ATP-binding region signature.|Serine/Threonine protein kinases active-site signature.	Phypoly-transcript-04043	0.169	SM1
Phypoly-transcript-12209	4.07058e-17	0.858067	0.782	0.471	6.15472e-13	0	Y7151_DICDI	GO:0003824|GO:0016020	2880	Phypoly-transcript-12209	0.311	SM1
Phypoly-transcript-05414	6.15773e-28	0.857811	0.99	0.832	9.31049e-24	0	AL221_ARATH	GO:0008152|GO:0016491|GO:0055114|GO:0008152|GO:0016491|GO:0055114	Aldehyde dehydrogenases glutamic acid active site.|Aldehyde dehydrogenase family	Phypoly-transcript-05414	0.158	SM1
Phypoly-transcript-01349	5.57228e-39	0.856595	0.843	0.309	8.42528e-35	0	DNLI_HAEIN	GO:0003909|GO:0051103|GO:0003910|GO:0005524|GO:0006281|GO:0006310	ATP-dependent DNA ligase signature 2.|ATP dependent DNA ligase domain	Phypoly-transcript-01349	0.534	SM1
Phypoly-transcript-20550	2.02659e-23	0.856534	0.929	0.679	3.0642e-19	0	CML16_ARATH	GO:0005509|GO:0005509|GO:0005509	EF-hand calcium-binding domain profile.|EF hand|EF-hand domain pair	Phypoly-transcript-20550	0.25	SM1
Phypoly-transcript-21087	1.3594e-25	0.855558	0.959	0.711	2.05541e-21	0	FKBP3_HUMAN	GO:0006457|GO:0006457	FKBP-type peptidyl-prolyl cis-trans isomerase|FKBP-type peptidyl-prolyl cis-trans isomerase domain profile.	Phypoly-transcript-21087	0.248	SM1
Phypoly-transcript-18799	2.49298e-26	0.855552	0.975	0.746	3.76939e-22	0	SODF_BORPE	GO:0004784|GO:0006801|GO:0046872|GO:0055114|GO:0004784|GO:0006801|GO:0046872|GO:0055114|GO:0004784|GO:0006801|GO:0046872|GO:0055114	Iron/manganese superoxide dismutases, C-terminal domain|Iron/manganese superoxide dismutases, alpha-hairpin domain|Manganese and iron superoxide dismutases signature.	Phypoly-transcript-18799	0.229	SM1
Phypoly-transcript-06963	2.76475e-23	0.854787	0.838	0.48	4.1803e-19	0	noGene	GO:0016020	1366	Phypoly-transcript-06963	0.358	SM1
Phypoly-transcript-08282	1.13616e-33	0.854366	0.98	0.754	1.71787e-29	0	PPP5_MOUSE	GO:0005515|GO:0016787|GO:0005515|GO:0005515	TPR repeat profile.|Calcineurin-like phosphoesterase|Tetratricopeptide repeat|TPR repeat region circular profile.	Phypoly-transcript-08282	0.226	SM1
Phypoly-transcript-04149	5.03961e-31	0.854317	0.964	0.835	7.61989e-27	0	HUTU_DICDI	GO:0016153|GO:0016153	Urocanase|Urocanase signature.	Phypoly-transcript-04149	0.129	SM1
Phypoly-transcript-12403	1.05302e-18	0.853884	0.701	0.376	1.59216e-14	0	APTX_CIOIN	GO:0003824	2087	Phypoly-transcript-12403	0.325	SM1
Phypoly-transcript-05792	1.81577e-29	0.853392	0.924	0.694	2.74544e-25	0	YOBN_BACSU	GO:0016491|GO:0055114	1626	Phypoly-transcript-05792	0.23	SM1
Phypoly-transcript-26521	3.79765e-31	0.853172	0.975	0.789	5.74204e-27	0	noGene	GO:0005525|GO:0007264	3588	Phypoly-transcript-26521	0.186	SM1
Phypoly-transcript-18209	2.50382e-28	0.852993	0.873	0.471	3.78577e-24	0	094L_FRG3G	GO:0003909|GO:0051103|GO:0003910|GO:0005524|GO:0006281|GO:0006310|GO:0003910|GO:0005524|GO:0006281|GO:0006310	ATP-dependent DNA ligase signature 2.|ATP dependent DNA ligase domain|ATP-dependent DNA ligase family profile.	Phypoly-transcript-18209	0.402	SM1
Phypoly-transcript-01499	1.98072e-27	0.852485	0.939	0.636	2.99485e-23	0	CYAD_DICDI	GO:0005524|GO:0009190|GO:0016849|GO:0035556|GO:0000156|GO:0000160|GO:0006355|GO:0000156|GO:0000160|GO:0006355|GO:0005515|GO:0005515|GO:0009190|GO:0016849|GO:0035556	Histidine kinase-, DNA gyrase B-, and HSP90-like ATPase|Adenylate and Guanylate cyclase catalytic domain|Response regulatory domain profile.|Response regulator receiver domain|TPR repeat region circular profile.|TPR repeat profile.|Guanylate cyclase domain profile.	Phypoly-transcript-01499	0.303	SM1
Phypoly-transcript-13354	5.95111e-29	0.851772	0.954	0.757	8.99809e-25	0	YFCG_ECOLI	GO:0005515|GO:0005515	Soluble glutathione S-transferase N-terminal domain profile.|Glutathione S-transferase, N-terminal domain	Phypoly-transcript-13354	0.197	SM1
Phypoly-transcript-13930	5.36053e-44	0.85167	0.97	0.749	8.10513e-40	0	MTAP_CHLAA	GO:0003824|GO:0009116	3074	Phypoly-transcript-13930	0.221	SM1
Phypoly-transcript-08306	3.41836e-26	0.851432	0.919	0.65	5.16857e-22	0	YJHC_ECOLI	GO:0016491|GO:0008152|GO:0016491|GO:0055114	Oxidoreductase family, NAD-binding Rossmann fold|Oxidoreductase family, C-terminal alpha/beta domain	Phypoly-transcript-08306	0.269	SM1
Phypoly-transcript-07315	5.15686e-34	0.851182	0.97	0.775	7.79717e-30	0	AL3A2_MOUSE	GO:0008152|GO:0016491|GO:0055114|GO:0008152|GO:0016491|GO:0055114	Aldehyde dehydrogenases glutamic acid active site.|Aldehyde dehydrogenase family	Phypoly-transcript-07315	0.195	SM1
Phypoly-transcript-02902	1.13972e-28	0.850677	0.975	0.902	1.72325e-24	0	TRIP4_MOUSE	GO:0005634|GO:0006355|GO:0008270	3512	Phypoly-transcript-02902	0.073	SM1
Phypoly-transcript-07316	6.33519e-06	0.850676	0.695	0.566	0.0957881	0	ESRP1_MOUSE	GO:0003676	1497	Phypoly-transcript-07316	0.129	SM1
Phypoly-transcript-03393	1.21029e-30	0.850496	0.985	0.879	1.82995e-26	0	PERQ_SEDLI	GO:0016491|GO:0016706|GO:0055114|GO:0016491|GO:0016706|GO:0055114	Fe(2+) 2-oxoglutarate dioxygenase domain profile.|2OG-Fe(II) oxygenase superfamily	Phypoly-transcript-03393	0.106	SM1
Phypoly-transcript-03727	1.35176e-23	0.850116	0.787	0.39	2.04386e-19	0	PTRB_MORLA	GO:0004252|GO:0070008|GO:0006508|GO:0008236	Prolyl oligopeptidase, N-terminal beta-propeller domain|Prolyl oligopeptidase family	Phypoly-transcript-03727	0.397	SM1
Phypoly-transcript-05326	3.00794e-33	0.849917	0.99	0.905	4.54801e-29	0	GRTP1_HUMAN	GO:0005097|GO:0032313|GO:0005509|GO:0005509|GO:0005097|GO:0032313	TBC/rab GAP domain profile.|EF-hand calcium-binding domain profile.|EF-hand domain|Rab-GTPase-TBC domain	Phypoly-transcript-05326	0.085	SM1
Phypoly-transcript-21303	2.04053e-28	0.849755	0.934	0.572	3.08528e-24	0	noGene	GO:0005515|GO:0005515|GO:0005515	PAZ domain|Piwi domain|Piwi domain profile.	Phypoly-transcript-21303	0.362	SM1
Phypoly-transcript-02058	5.60626e-33	0.848942	0.99	0.913	8.47666e-29	0	GEFM_DICDI	GO:0005085|GO:0005622|GO:0051056|GO:0005085|GO:0005622|GO:0007264|GO:0005085|GO:0005622|GO:0007264|GO:0005085|GO:0005622|GO:0051056	RasGEF N-terminal motif|RasGEF domain|Ras guanine-nucleotide exchange factors catalytic domain profile.|Ras guanine-nucleotide exchange factors N-terminal domain profile.	Phypoly-transcript-02058	0.077	SM1
Phypoly-transcript-01111	7.05311e-25	0.848785	0.98	0.934	1.06643e-20	0	RPB2_DICDI	GO:0003677|GO:0003899|GO:0006351|GO:0003677|GO:0003899|GO:0006351|GO:0003677|GO:0003899|GO:0006351|GO:0003677|GO:0003899|GO:0006351|GO:0003677|GO:0003899|GO:0006351|GO:0003677|GO:0003899|GO:0006351|GO:0003677|GO:0003899|GO:0006351|GO:0003677|GO:0003899|GO:0006351	RNA polymerase Rpb2, domain 3|RNA polymerase Rpb2, domain 7|RNA polymerase Rpb2, domain 6|RNA polymerase Rpb2, domain 4|RNA polymerases beta chain signature.|RNA polymerase beta subunit|RNA polymerase Rpb2, domain 5|RNA polymerase Rpb2, domain 2	Phypoly-transcript-01111	0.046	SM1
Phypoly-transcript-08967	1.42635e-30	0.848188	0.97	0.694	2.15665e-26	0	WDR4_DICDI	GO:0005515|GO:0005515|GO:0005515	Trp-Asp (WD) repeats circular profile.|Trp-Asp (WD) repeats profile.|WD domain, G-beta repeat	Phypoly-transcript-08967	0.276	SM1
Phypoly-transcript-12223	7.83048e-32	0.848009	0.975	0.786	1.18397e-27	0	noGene	GO:0046872|GO:0046872	Zinc finger C2H2 type domain profile.|Zinc finger C2H2 type domain signature.	Phypoly-transcript-12223	0.189	SM1
Phypoly-transcript-07247	1.22451e-29	0.847626	0.964	0.76	1.85146e-25	0	GRLE_DICDI	GO:0008061|GO:0004930|GO:0007186|GO:0016021|GO:0004930|GO:0007186|GO:0016021	Chitin-binding type-1 domain profile.|G-protein coupled receptors family 3 profile.|7 transmembrane sweet-taste receptor of 3 GCPR	Phypoly-transcript-07247	0.204	SM1
Phypoly-transcript-18253	8.32154e-24	0.847575	0.914	0.676	1.25822e-19	0	LIMD2_BOVIN	GO:0008270|GO:0008270	LIM domain profile.|LIM domain	Phypoly-transcript-18253	0.238	SM1
Phypoly-transcript-12052	1.60687e-29	0.846934	0.975	0.763	2.42959e-25	0	ATPF2_HUMAN	GO:0043461	425	Phypoly-transcript-12052	0.212	SM1
Phypoly-transcript-14266	1.14759e-28	0.846577	0.97	0.838	1.73515e-24	0	COPE1_ARATH	GO:0005198|GO:0006890	817	Phypoly-transcript-14266	0.132	SM1
Phypoly-transcript-04402	1.98783e-32	0.84646	0.975	0.78	3.0056e-28	0	UPL2_ARATH	GO:0004842|GO:0004842	HECT domain profile.|HECT-domain (ubiquitin-transferase)	Phypoly-transcript-04402	0.195	SM1
Phypoly-transcript-02794	2.0396e-24	0.846193	0.98	0.922	3.08387e-20	0	GPTC1_BOVIN	GO:0003676|GO:0003676	G-patch domain|G-patch domain profile.	Phypoly-transcript-02794	0.058	SM1
Phypoly-transcript-00302	1.6785e-28	0.845987	0.995	0.957	2.53789e-24	0	NWD1_HUMAN	GO:0005515|GO:0005515|GO:0005515	Trp-Asp (WD) repeats circular profile.|Trp-Asp (WD) repeats profile.|WD domain, G-beta repeat	Phypoly-transcript-00302	0.038	SM1
Phypoly-transcript-24812	2.98384e-23	0.845914	0.883	0.607	4.51156e-19	0	noGene	GO:0006508|GO:0008237|GO:0008152|GO:0016787	ArgE / dapE / ACY1 / CPG2 / yscS family signature 1.|Peptidase family M20/M25/M40	Phypoly-transcript-24812	0.276	SM1
Phypoly-transcript-00681	8.54822e-26	0.845843	0.975	0.861	1.29249e-21	0	MHCKC_DICDI	GO:0003676|GO:0003676|GO:0004674|GO:0005524|GO:0006468|GO:0004674|GO:0005524|GO:0006468	Eukaryotic RNA Recognition Motif (RRM) profile.|RNA recognition motif. (a.k.a. RRM, RBD, or RNP domain)|Alpha-type protein kinase domain profile.|Alpha-kinase family	Phypoly-transcript-00681	0.114	SM1
Phypoly-transcript-04612	2.57947e-25	0.84557	0.954	0.772	3.90016e-21	0	GYP1_SCHPO	GO:0005097|GO:0032313|GO:0005097|GO:0032313	TBC/rab GAP domain profile.|Rab-GTPase-TBC domain	Phypoly-transcript-04612	0.182	SM1
Phypoly-transcript-18472	1.84185e-24	0.845021	0.914	0.621	2.78488e-20	0	SCP1_BRALA	GO:0005509|GO:0005509	EF-hand calcium-binding domain profile.|EF-hand domain pair	Phypoly-transcript-18472	0.293	SM1
Phypoly-transcript-04248	8.39742e-22	0.844485	0.853	0.552	1.26969e-17	0	DYRK2_DICDI	GO:0004674|GO:0006468|GO:0004672|GO:0005524|GO:0006468|GO:0004672|GO:0005524|GO:0006468	Serine/Threonine protein kinases active-site signature.|Protein kinase domain|Protein kinase domain profile.	Phypoly-transcript-04248	0.301	SM1
Phypoly-transcript-17339	1.86198e-08	0.844422	0.36	0.162	0.000281532	0	RAB7A_DICDI	GO:0005525|GO:0007264	3588	Phypoly-transcript-17339	0.198	SM1
Phypoly-transcript-17596	3.33096e-36	0.844338	0.98	0.725	5.03641e-32	0	CYB5B_ARATH	GO:0020037|GO:0020037	Cytochrome b5-like Heme/Steroid binding domain|Cytochrome b5 family, heme-binding domain profile.	Phypoly-transcript-17596	0.255	SM1
Phypoly-transcript-05265	3.42335e-27	0.843889	0.959	0.772	5.1761e-23	0	SIR2_DANRE	GO:0070403|GO:0008270|GO:0008270	Sir2 family|Zinc finger UBP-type profile.|Zn-finger in ubiquitin-hydrolases and other protein	Phypoly-transcript-05265	0.187	SM1
Phypoly-transcript-13469	1.66141e-21	0.84369	0.888	0.561	2.51206e-17	0	MAT1_MARGL	GO:0005634|GO:0007049|GO:0005515|GO:0008270	CDK-activating kinase assembly factor MAT1|Zinc finger RING-type profile.	Phypoly-transcript-13469	0.327	SM1
Phypoly-transcript-04264	1.67337e-32	0.843425	0.985	0.754	2.53013e-28	0	GALC_DANRE	GO:0004336|GO:0006683	1847	Phypoly-transcript-04264	0.231	SM1
Phypoly-transcript-28967	8.49954e-35	0.843424	0.98	0.737	1.28513e-30	0	COX6B_DICDI	GO:0004129|GO:0005739	973	Phypoly-transcript-28967	0.243	SM1
Phypoly-transcript-11731	2.0002e-37	0.843404	0.98	0.775	3.02431e-33	0	LIP_RHIMI	GO:0005515|GO:0005515|GO:0004806|GO:0006629	Fibronectin type-III domain profile.|Fibronectin type III domain|Lipase (class 3)	Phypoly-transcript-11731	0.205	SM1
Phypoly-transcript-04447	1.46152e-39	0.842431	0.954	0.676	2.20982e-35	0	NF1_MOUSE	GO:0005096|GO:0005622|GO:0051056|GO:0005096|GO:0005622|GO:0051056	GTPase-activator protein for Ras-like GTPase|Ras GTPase-activating proteins profile.	Phypoly-transcript-04447	0.278	SM1
Phypoly-transcript-11899	2.2373e-23	0.842411	0.898	0.578	3.3828e-19	0	RA51B_HUMAN	GO:0003677|GO:0005524|GO:0006259|GO:0008094	3608	Phypoly-transcript-11899	0.32	SM1
Phypoly-transcript-08129	1.20115e-26	0.841942	0.954	0.694	1.81614e-22	0	SEC31_USTMA	GO:0005515|GO:0005515|GO:0005515|GO:0005515	Trp-Asp (WD) repeats circular profile.|WD domain, G-beta repeat|F-box domain profile.|Trp-Asp (WD) repeats profile.	Phypoly-transcript-08129	0.26	SM1
Phypoly-transcript-01711	4.07738e-28	0.841863	0.99	0.855	6.16499e-24	0	VPS18_DANRE	GO:0006886|GO:0016192|GO:0006886|GO:0016192	Region in Clathrin and VPS|Clathrin heavy-chain (CHCR) repeat profile.	Phypoly-transcript-01711	0.135	SM1
Phypoly-transcript-10048	3.77732e-26	0.841694	0.934	0.636	5.71131e-22	0	LACE1_RAT	GO:0005524	180	Phypoly-transcript-10048	0.298	SM1
Phypoly-transcript-16759	1.40493e-20	0.841654	0.792	0.434	2.12425e-16	0	UN13C_MOUSE	GO:0005515|GO:0005515	C2 domain profile.|C2 domain	Phypoly-transcript-16759	0.358	SM1
Phypoly-transcript-11284	1.33303e-26	0.841575	0.964	0.743	2.01554e-22	0	MTNA_CROS8	GO:0044237	2182	Phypoly-transcript-11284	0.221	SM1
Phypoly-transcript-12387	5.42641e-25	0.841247	0.964	0.801	8.20474e-21	0	URM1_DICDI	GO:0005737|GO:0034227	4788	Phypoly-transcript-12387	0.163	SM1
Phypoly-transcript-11716	4.23354e-19	0.840876	0.914	0.691	6.40111e-15	0	SPOP_XENTR	GO:0005515|GO:0005515	BTB/POZ domain|BTB domain profile.	Phypoly-transcript-11716	0.223	SM1
Phypoly-transcript-17014	4.15523e-28	0.840859	0.975	0.803	6.2827e-24	0	Y1621_SYNY3	GO:0016491	3615	Phypoly-transcript-17014	0.172	SM1
Phypoly-transcript-04737	9.78173e-27	0.840504	0.954	0.743	1.479e-22	0	THOP1_HUMAN	GO:0004222|GO:0006508	2941	Phypoly-transcript-04737	0.211	SM1
Phypoly-transcript-28605	0.000784128	0.840444	0.127	0.049	1	0	noGene	GO:0005515	1532	Phypoly-transcript-28605	0.078	SM1
Phypoly-transcript-11374	3.87914e-25	0.840005	0.954	0.731	5.86527e-21	0	KCND3_RABIT	GO:0051260	553	Phypoly-transcript-11374	0.223	SM1
Phypoly-transcript-03459	3.04597e-24	0.839516	0.98	0.838	4.6055e-20	0	GTAP_DICDI	GO:0003700|GO:0006355|GO:0008270|GO:0043565|GO:0003700|GO:0006355|GO:0008270|GO:0043565|GO:0003700|GO:0006355|GO:0008270|GO:0043565	GATA zinc finger|GATA-type zinc finger domain.|GATA-type zinc finger domain profile.	Phypoly-transcript-03459	0.142	SM1
Phypoly-transcript-10967	5.88358e-24	0.83914	0.934	0.751	8.89597e-20	0	UNG_PECCP	GO:0006281|GO:0016799|GO:0003676|GO:0003676	Uracil-DNA glycosylase signature.|SAP domain|SAP motif profile.	Phypoly-transcript-10967	0.183	SM1
Phypoly-transcript-04872	2.6285e-32	0.838752	0.985	0.954	3.9743e-28	0	Y9043_DICDI	GO:0005515	295	Phypoly-transcript-04872	0.031	SM1
Phypoly-transcript-22590	2.64008e-26	0.838196	0.959	0.711	3.9918e-22	0	SUGT1_DICDI	GO:0005515|GO:0005515	TPR repeat profile.|TPR repeat region circular profile.	Phypoly-transcript-22590	0.248	SM1
Phypoly-transcript-02608	1.15689e-28	0.83759	0.975	0.806	1.74921e-24	0	DCLY_HAFAL	GO:0003824|GO:0003824|GO:0003824|GO:0016831	Orn/Lys/Arg decarboxylases family 1 pyridoxal-P attachment site.|Orn/Lys/Arg decarboxylase, major domain|Orn/Lys/Arg decarboxylase, C-terminal domain|Orn/Lys/Arg decarboxylase, N-terminal domain	Phypoly-transcript-02608	0.169	SM1
Phypoly-transcript-07280	1.43115e-30	0.837325	0.98	0.835	2.1639e-26	0	KRAC_DICDI	GO:0004674|GO:0005524|GO:0006468|GO:0005524|GO:0004674|GO:0006468|GO:0004674|GO:0005524|GO:0006468|GO:0004672|GO:0005524|GO:0006468|GO:0004672|GO:0005524|GO:0006468	AGC-kinase C-terminal domain profile.|Protein kinases ATP-binding region signature.|Serine/Threonine protein kinases active-site signature.|Protein kinase C terminal domain|Protein kinase domain profile.|Protein kinase domain	Phypoly-transcript-07280	0.145	SM1
Phypoly-transcript-03452	5.18207e-28	0.837129	0.975	0.798	7.83529e-24	0	NNTM_HUMAN	GO:0016491|GO:0055114|GO:0016491|GO:0055114|GO:0008750|GO:0016021|GO:0050661|GO:0055114	Alanine dehydrogenase & pyridine nucleotide transhydrogenase signature 2.|Alanine dehydrogenase & pyridine nucleotide transhydrogenase signature 1.|NAD(P) transhydrogenase beta subunit	Phypoly-transcript-03452	0.177	SM1
Phypoly-transcript-09879	4.20291e-34	0.837026	0.98	0.858	6.3548e-30	0	YL509_MIMIV	GO:0005509|GO:0005509	EF-hand calcium-binding domain profile.|EF-hand domain pair	Phypoly-transcript-09879	0.122	SM1
Phypoly-transcript-08448	1.268e-25	0.836974	0.98	0.855	1.91722e-21	0	DUS7_RAT	GO:0006470|GO:0008138|GO:0016311|GO:0016791|GO:0004725|GO:0016311|GO:0016791|GO:0006470|GO:0008138	Dual specificity protein phosphatase family profile.|Tyrosine specific protein phosphatases family profile.|Tyrosine specific protein phosphatases active site.|Dual specificity phosphatase, catalytic domain	Phypoly-transcript-08448	0.125	SM1
Phypoly-transcript-14316	8.05538e-32	0.83664	0.97	0.746	1.21797e-27	0	noGene	GO:0005515	1609	Phypoly-transcript-14316	0.224	SM1
Phypoly-transcript-12056	1.5922e-31	0.836274	0.98	0.829	2.40741e-27	0	PSD10_DICDI	GO:0005515|GO:0005515	Ankyrin repeat|Ankyrin repeat profile.	Phypoly-transcript-12056	0.151	SM1
Phypoly-transcript-23779	1.71624e-29	0.836256	0.975	0.884	2.59495e-25	0	S5A1_HUMAN	GO:0005737|GO:0006629|GO:0016021|GO:0016627|GO:0005737|GO:0006629|GO:0016021|GO:0016627	Steroid 5-alpha reductase C-terminal domain profile.|3-oxo-5-alpha-steroid 4-dehydrogenase	Phypoly-transcript-23779	0.091	SM1
Phypoly-transcript-21503	2.86975e-12	0.836024	0.391	0.145	4.33907e-08	0	PIWL2_HUMAN	GO:0005515|GO:0005515	Piwi domain profile.|Piwi domain	Phypoly-transcript-21503	0.246	SM1
Phypoly-transcript-15577	1.78085e-30	0.83516	0.975	0.841	2.69265e-26	0	noGene	GO:0005515|GO:0004674|GO:0005524|GO:0006468|GO:0005515|GO:0005515|GO:0004674|GO:0005524|GO:0006468	Trp-Asp (WD) repeats profile.|Alpha-type protein kinase domain profile.|Trp-Asp (WD) repeats circular profile.|WD domain, G-beta repeat|Alpha-kinase family	Phypoly-transcript-15577	0.134	SM1
Phypoly-transcript-09489	6.11588e-16	0.835002	0.782	0.48	9.24721e-12	0	DBR1_HUMAN	GO:0016787	597	Phypoly-transcript-09489	0.302	SM1
Phypoly-transcript-25864	3.7471e-16	0.834898	0.706	0.39	5.66562e-12	0	ACPS_THICR	GO:0000287|GO:0008897|GO:0009059	43	Phypoly-transcript-25864	0.316	SM1
Phypoly-transcript-19367	1.04755e-28	0.834512	0.98	0.806	1.5839e-24	0	FHKC_DICDI	GO:0005515|GO:0005524|GO:0005515|GO:0004674|GO:0006468|GO:0004672|GO:0005524|GO:0006468|GO:0004672|GO:0005524|GO:0006468	FHA domain|Protein kinases ATP-binding region signature.|Forkhead-associated (FHA) domain profile.|Serine/Threonine protein kinases active-site signature.|Protein kinase domain|Protein kinase domain profile.	Phypoly-transcript-19367	0.174	SM1
Phypoly-transcript-15275	2.57188e-38	0.834237	0.985	0.867	3.88868e-34	0	MRT4_HUMAN	GO:0003924|GO:0005525|GO:0006184|GO:0043234|GO:0051258	4618	Phypoly-transcript-15275	0.118	SM1
Phypoly-transcript-01870	4.38654e-28	0.834115	0.924	0.587	6.63245e-24	0	TM63A_MOUSE	GO:0016020	1301	Phypoly-transcript-01870	0.337	SM1
Phypoly-transcript-17381	3.34249e-21	0.833584	0.909	0.685	5.05384e-17	0	MED7_DICDI	GO:0001104|GO:0006357|GO:0016592	2438	Phypoly-transcript-17381	0.224	SM1
Phypoly-transcript-04755	4.3084e-31	0.833291	0.97	0.806	6.5143e-27	0	LKHA4_DICDI	GO:0008237|GO:0008270|GO:0008237|GO:0008270|GO:0019370	Peptidase family M1|Leukotriene A4 hydrolase, C-terminal	Phypoly-transcript-04755	0.164	SM1
Phypoly-transcript-15866	1.57575e-13	0.833274	0.416	0.147	2.38253e-09	0	noGene	GO:0008061|GO:0008061|GO:0008061	Chitin recognition protein|Chitin recognition or binding domain signature.|Chitin-binding type-1 domain profile.	Phypoly-transcript-15866	0.269	SM1
Phypoly-transcript-04241	4.41722e-29	0.832761	0.99	0.902	6.67883e-25	0	FUT11_ARATH	GO:0006486|GO:0008417|GO:0016020	1900	Phypoly-transcript-04241	0.088	SM1
Phypoly-transcript-08731	2.79313e-24	0.832476	0.97	0.728	4.22321e-20	0	CHID1_XENTR	GO:0004553|GO:0005975	1865	Phypoly-transcript-08731	0.242	SM1
Phypoly-transcript-00185	3.07447e-32	0.832186	0.98	0.879	4.64859e-28	0	ACTNA_DICDI	GO:0005515|GO:0005525|GO:0007264|GO:0008060|GO:0008270|GO:0032312|GO:0008060|GO:0008270|GO:0032312|GO:0005515	Calponin homology (CH) domain|Ras family|ARF GTPase-activating proteins domain profile.|Putative GTPase activating protein for Arf|Calponin homology domain profile.	Phypoly-transcript-00185	0.101	SM1
Phypoly-transcript-07910	7.85456e-18	0.832172	0.772	0.471	1.18761e-13	0	noGene	GO:0005515	1532	Phypoly-transcript-07910	0.301	SM1
Phypoly-transcript-05772	6.23024e-26	0.83211	0.898	0.665	9.42013e-22	0	noGene	GO:0000981|GO:0005634|GO:0006355|GO:0008270|GO:0000981|GO:0005634|GO:0006355|GO:0008270	Fungal Zn(2)-Cys(6) binuclear cluster domain|Zn(2)-C6 fungal-type DNA-binding domain profile.	Phypoly-transcript-05772	0.233	SM1
Phypoly-transcript-06179	1.00019e-34	0.832041	0.975	0.832	1.51229e-30	0	ARLY_HUMAN	GO:0003824	1684	Phypoly-transcript-06179	0.143	SM1
Phypoly-transcript-11260	3.09816e-33	0.831993	0.97	0.789	4.68442e-29	0	CHIL3_MOUSE	GO:0004553|GO:0005975|GO:0004553|GO:0005975	Glycosyl hydrolases family 18|Chitinases family 18 active site.	Phypoly-transcript-11260	0.181	SM1
Phypoly-transcript-20714	2.32204e-27	0.831246	0.985	0.789	3.51092e-23	0	NUDT3_ARATH	GO:0016787|GO:0016787	Nudix hydrolase domain profile.|NUDIX domain	Phypoly-transcript-20714	0.196	SM1
Phypoly-transcript-17093	3.6288e-38	0.831067	0.975	0.783	5.48674e-34	0	GST8_CAEEL	GO:0005515|GO:0005515	Glutathione S-transferase, N-terminal domain|Soluble glutathione S-transferase N-terminal domain profile.	Phypoly-transcript-17093	0.192	SM1
Phypoly-transcript-13153	3.60339e-24	0.829678	0.944	0.668	5.44832e-20	0	ZNRF2_MOUSE	GO:0005515|GO:0008270|GO:0005515|GO:0008270	Ring finger domain|Zinc finger RING-type profile.	Phypoly-transcript-13153	0.276	SM1
Phypoly-transcript-08860	3.55296e-26	0.829609	0.914	0.647	5.37207e-22	0	IMA1A_ORYSJ	GO:0005515|GO:0005515	Armadillo/beta-catenin-like repeat|Armadillo/plakoglobin ARM repeat profile.	Phypoly-transcript-08860	0.267	SM1
Phypoly-transcript-24111	1.33892e-20	0.829439	0.868	0.543	2.02444e-16	0	BET1_SCHPO	GO:0005515	4327	Phypoly-transcript-24111	0.325	SM1
Phypoly-transcript-10739	2.61189e-17	0.829427	0.807	0.503	3.94918e-13	0	TRAF4_HUMAN	GO:0008270|GO:0005515|GO:0008270	Zinc finger TRAF-type profile.|Zinc finger RING-type profile.	Phypoly-transcript-10739	0.304	SM1
Phypoly-transcript-01194	9.64384e-30	0.829424	0.98	0.89	1.45815e-25	0	PIWL2_DANRE	GO:0005515|GO:0005515|GO:0003676|GO:0005515|GO:0003676|GO:0005515	Piwi domain|PAZ domain|G-patch domain|Piwi domain profile.|G-patch domain profile.|PAZ domain profile.	Phypoly-transcript-01194	0.09	SM1
Phypoly-transcript-05616	1.532e-20	0.829252	0.853	0.566	2.31638e-16	0	C3H35_ARATH	GO:0046872|GO:0005515|GO:0008270|GO:0046872|GO:0005515|GO:0008270	Zinc finger C3H1-type profile.|Zinc finger RING-type profile.|Zinc finger C-x8-C-x5-C-x3-H type (and similar)|Ring finger domain	Phypoly-transcript-05616	0.287	SM1
Phypoly-transcript-06351	2.05419e-23	0.829236	0.914	0.711	3.10593e-19	0	noGene	GO:0005515	1532	Phypoly-transcript-06351	0.203	SM1
Phypoly-transcript-06248	4.57252e-29	0.828978	0.975	0.795	6.91364e-25	0	BRAP_MOUSE	GO:0008270|GO:0005515|GO:0008270|GO:0005515|GO:0008270|GO:0008270	Zn-finger in ubiquitin-hydrolases and other protein|Ring finger domain|Zinc finger RING-type profile.|Zinc finger UBP-type profile.	Phypoly-transcript-06248	0.18	SM1
Phypoly-transcript-17518	3.14343e-26	0.828266	0.964	0.754	4.75287e-22	0	GUN1_STRRE	GO:0005975|GO:0008810|GO:0004553|GO:0005975	N-terminal ig-like domain of cellulase|Glycosyl hydrolase family 9	Phypoly-transcript-17518	0.21	SM1
Phypoly-transcript-11680	1.76302e-26	0.828104	0.964	0.772	2.66569e-22	0	UBIE_BRUME	GO:0008152|GO:0008168	2474	Phypoly-transcript-11680	0.192	SM1
Phypoly-transcript-03864	4.47665e-31	0.828033	0.985	0.746	6.7687e-27	0	GRLE_DICDI	GO:0004930|GO:0007186|GO:0016021|GO:0004930|GO:0007186|GO:0016021	G-protein coupled receptors family 3 profile.|7 transmembrane sweet-taste receptor of 3 GCPR	Phypoly-transcript-03864	0.239	SM1
Phypoly-transcript-06422	1.558e-26	0.828026	0.954	0.711	2.3557e-22	0	DJC16_HUMAN	GO:0045454	4408	Phypoly-transcript-06422	0.243	SM1
Phypoly-transcript-06739	5.05838e-23	0.827721	0.898	0.592	7.64828e-19	0	DPH2_NEMVE	GO:0005737|GO:0017183	3484	Phypoly-transcript-06739	0.306	SM1
Phypoly-transcript-25320	8.83379e-20	0.82766	0.868	0.549	1.33567e-15	0	FRDA_DICDI	GO:0008199|GO:0016226|GO:0008199|GO:0016226	Frataxin family profile.|Frataxin-like domain	Phypoly-transcript-25320	0.319	SM1
Phypoly-transcript-12034	1.67336e-31	0.82759	0.97	0.829	2.53012e-27	0	SPNA_DICDI	GO:0004722|GO:0006470|GO:0003824	Protein phosphatase 2C signature.|Protein phosphatase 2C	Phypoly-transcript-12034	0.141	SM1
Phypoly-transcript-08055	9.76143e-32	0.827453	0.964	0.783	1.47593e-27	0	CATA2_ARATH	GO:0004096|GO:0006979|GO:0020037|GO:0055114|GO:0020037|GO:0004096|GO:0004096|GO:0020037|GO:0055114	catalase family profile.|Catalase proximal heme-ligand signature.|Catalase proximal active site signature.|Catalase	Phypoly-transcript-08055	0.181	SM1
Phypoly-transcript-12749	8.73474e-21	0.827449	0.939	0.743	1.32069e-16	0	noGene	GO:0005515	1532	Phypoly-transcript-12749	0.196	SM1
Phypoly-transcript-19912	3.09464e-20	0.827392	0.939	0.705	4.6791e-16	0	ARF1_BRARP	GO:0005525|GO:0005622|GO:0007264|GO:0005525	small GTPase Arf family profile.|ADP-ribosylation factor family	Phypoly-transcript-19912	0.234	SM1
Phypoly-transcript-02783	4.32433e-29	0.827315	0.975	0.858	6.53839e-25	0	WSDU1_DANRE	GO:0000151|GO:0004842|GO:0016567	4651	Phypoly-transcript-02783	0.117	SM1
Phypoly-transcript-05532	1.74304e-30	0.827041	0.97	0.775	2.63548e-26	0	UBP12_ARATH	GO:0005622|GO:0008270|GO:0005515|GO:0005515|GO:0008270|GO:0005515	B-box zinc finger|MATH domain|Zinc finger RING-type profile.|MATH/TRAF domain profile.	Phypoly-transcript-05532	0.195	SM1
Phypoly-transcript-01191	8.90977e-34	0.82694	0.98	0.942	1.34716e-29	0	PP2BA_DICDI	GO:0016787|GO:0016787	Serine/threonine specific protein phosphatases signature.|Calcineurin-like phosphoesterase	Phypoly-transcript-01191	0.038	SM1
Phypoly-transcript-00702	1.54354e-31	0.826538	0.975	0.818	2.33384e-27	0	TM260_DICDI	GO:0005515|GO:0004672|GO:0006468|GO:0004672|GO:0005524|GO:0006468|GO:0005515|GO:0004674|GO:0006468|GO:0005524	Src homology 2 (SH2) domain profile.|Protein tyrosine kinase|Protein kinase domain profile.|SH2 domain|Serine/Threonine protein kinases active-site signature.|Protein kinases ATP-binding region signature.	Phypoly-transcript-00702	0.157	SM1
Phypoly-transcript-01737	4.81054e-29	0.826224	0.975	0.812	7.27353e-25	0	IF4G_ORYSJ	GO:0005515|GO:0003723|GO:0005515|GO:0005515	eIF4-gamma/eIF5/eIF2-epsilon|MIF4G domain|W2 domain profile.	Phypoly-transcript-01737	0.163	SM1
Phypoly-transcript-20186	2.95845e-15	0.824539	0.746	0.436	4.47318e-11	0	PEMTL_DICDI	GO:0005737|GO:0006629|GO:0016021|GO:0016627|GO:0006644|GO:0008170	Steroid 5-alpha reductase C-terminal domain profile.|Phospholipid methyltransferases (EC 2.1.1.17 and EC=2.1.1.71) family profile.	Phypoly-transcript-20186	0.31	SM1
Phypoly-transcript-05859	3.82293e-33	0.824487	0.98	0.853	5.78026e-29	0	POR_GLUOX	GO:0016491|GO:0055114|GO:0016491|GO:0050662|GO:0055114|GO:0019594|GO:0055114	Mannitol dehydrogenase Rossmann domain|Mannitol dehydrogenase C-terminal domain|Mannitol dehydrogenases signature.	Phypoly-transcript-05859	0.127	SM1
Phypoly-transcript-05765	5.44234e-26	0.824384	0.944	0.783	8.22882e-22	0	FIGL1_RAT	GO:0005524|GO:0005524	AAA-protein family signature.|ATPase family associated with various cellular activities (AAA)	Phypoly-transcript-05765	0.161	SM1
Phypoly-transcript-13231	5.72201e-20	0.823995	0.827	0.512	8.65168e-16	0	IABN_GEOSE	GO:0004553|GO:0005975	1884	Phypoly-transcript-13231	0.315	SM1
Phypoly-transcript-08953	8.05004e-28	0.823951	0.939	0.659	1.21717e-23	0	BCS1A_DICDI	GO:0005524|GO:0005524	ATPase family associated with various cellular activities (AAA)|AAA-protein family signature.	Phypoly-transcript-08953	0.28	SM1
Phypoly-transcript-07592	2.37449e-27	0.823824	0.975	0.775	3.59023e-23	0	SHT_ARATH	GO:0016747	4499	Phypoly-transcript-07592	0.2	SM1
Phypoly-transcript-08740	4.06072e-27	0.823668	0.964	0.806	6.13981e-23	0	LRRD1_MOUSE	GO:0005515|GO:0005515	Leucine Rich Repeat|Leucine-rich repeat profile.	Phypoly-transcript-08740	0.158	SM1
Phypoly-transcript-07652	1.27984e-20	0.823589	0.873	0.572	1.93512e-16	0	NTPES_BACSU	GO:0016787|GO:0009166|GO:0016787	Calcineurin-like phosphoesterase|5'-nucleotidase, C-terminal domain	Phypoly-transcript-07652	0.301	SM1
Phypoly-transcript-13526	1.71134e-24	0.823562	0.944	0.682	2.58755e-20	0	HSOP3_ARATH	GO:0005515|GO:0005515|GO:0005515	Tetratricopeptide repeat|TPR repeat profile.|TPR repeat region circular profile.	Phypoly-transcript-13526	0.262	SM1
Phypoly-transcript-09461	6.61779e-28	0.823359	0.853	0.5	1.00061e-23	0	Y8487_DICDI	GO:0004672|GO:0005524|GO:0006468|GO:0004674|GO:0006468|GO:0004672|GO:0005524|GO:0006468	Protein kinase domain|Serine/Threonine protein kinases active-site signature.|Protein kinase domain profile.	Phypoly-transcript-09461	0.353	SM1
Phypoly-transcript-05795	7.98452e-27	0.822827	0.97	0.806	1.20726e-22	0	KBTB8_RAT	GO:0005515|GO:0005515	BTB/POZ domain|BTB domain profile.	Phypoly-transcript-05795	0.164	SM1
Phypoly-transcript-18280	2.99798e-23	0.822789	0.939	0.65	4.53294e-19	0	MED31_DICDI	GO:0001104|GO:0006355|GO:0016592	4185	Phypoly-transcript-18280	0.289	SM1
Phypoly-transcript-07199	9.97684e-33	0.82266	0.883	0.462	1.5085e-28	0	noGene	GO:0005515	4454	Phypoly-transcript-07199	0.421	SM1
Phypoly-transcript-03223	1.29411e-30	0.82199	0.98	0.798	1.9567e-26	0	CTR1_ARATH	GO:0004672|GO:0005524|GO:0006468|GO:0005524|GO:0005515|GO:0004674|GO:0006468|GO:0004672|GO:0006468	Protein kinase domain profile.|Protein kinases ATP-binding region signature.|Ankyrin repeat profile.|Serine/Threonine protein kinases active-site signature.|Protein tyrosine kinase	Phypoly-transcript-03223	0.182	SM1
Phypoly-transcript-14014	3.93853e-23	0.821718	0.929	0.697	5.95506e-19	0	YXBG_BACSU	GO:0016491|GO:0008152|GO:0016491	Short-chain dehydrogenases/reductases family signature.|short chain dehydrogenase	Phypoly-transcript-14014	0.232	SM1
Phypoly-transcript-05035	1.48861e-28	0.821344	0.975	0.841	2.25078e-24	0	DCP2_MOUSE	GO:0003723|GO:0016787|GO:0030145|GO:0016787|GO:0016787|GO:0016787	Dcp2, box A domain|Nudix hydrolase domain profile.|Nudix box signature.|NUDIX domain	Phypoly-transcript-05035	0.134	SM1
Phypoly-transcript-04010	6.27842e-27	0.821212	0.97	0.795	9.49298e-23	0	DYIN_DICDI	GO:0005868|GO:0007018|GO:0005515|GO:0005515	Cytoplasmic dynein 1 intermediate chain 2|Trp-Asp (WD) repeats circular profile.|WD domain, G-beta repeat	Phypoly-transcript-04010	0.175	SM1
Phypoly-transcript-03203	2.00154e-29	0.821102	0.98	0.873	3.02634e-25	0	PARN_MOUSE	GO:0003910|GO:0005524|GO:0006281|GO:0006310	383	Phypoly-transcript-03203	0.107	SM1
Phypoly-transcript-05806	3.3933e-25	0.82086	0.944	0.714	5.13067e-21	0	ACSM3_HUMAN	GO:0003824|GO:0008152	277	Phypoly-transcript-05806	0.23	SM1
Phypoly-transcript-00810	2.0955e-28	0.820816	0.964	0.844	3.1684e-24	0	PPT1_SCHPO	GO:0005509|GO:0005509|GO:0016787	EF-hand calcium-binding domain profile.|EF-hand domain pair|Calcineurin-like phosphoesterase	Phypoly-transcript-00810	0.12	SM1
Phypoly-transcript-04165	9.06646e-28	0.820807	0.97	0.798	1.37085e-23	0	NPC3_ARATH	GO:0016788	3033	Phypoly-transcript-04165	0.172	SM1
Phypoly-transcript-14167	1.0287e-19	0.820226	0.472	0.127	1.55539e-15	0	noGene	GO:0003677|GO:0005524	4168	Phypoly-transcript-14167	0.345	SM1
Phypoly-transcript-08595	1.96553e-27	0.820216	0.954	0.777	2.97188e-23	0	ABCGO_DICDI	GO:0005524|GO:0016887|GO:0005524|GO:0016887|GO:0005524|GO:0016887|GO:0016020	ATP-binding cassette, ABC transporter-type domain profile.|ABC transporter|ABC transporters family signature.|ABC-2 type transporter	Phypoly-transcript-08595	0.177	SM1
Phypoly-transcript-06176	3.52703e-28	0.820133	0.959	0.775	5.33287e-24	0	SUC2_ARATH	GO:0016021|GO:0055085	2392	Phypoly-transcript-06176	0.184	SM1
Phypoly-transcript-21313	2.37806e-08	0.819988	0.355	0.159	0.000359563	0	BZPF_DICDI	GO:0003700|GO:0006355|GO:0043565|GO:0003700|GO:0006355|GO:0043565|GO:0003700|GO:0006355|GO:0043565	Basic region leucine zipper|Basic-leucine zipper (bZIP) domain profile.|Basic-leucine zipper (bZIP) domain signature.	Phypoly-transcript-21313	0.196	SM1
Phypoly-transcript-04093	1.20958e-26	0.819905	0.964	0.749	1.82889e-22	0	PLDA_DICDI	GO:0003824|GO:0008152|GO:0003824|GO:0008152	Phospholipase D phosphodiesterase active site profile.|Phospholipase D Active site motif	Phypoly-transcript-04093	0.215	SM1
Phypoly-transcript-05905	2.24117e-31	0.81989	0.975	0.803	3.38865e-27	0	LYSN_THET2	GO:0008839|GO:0009089|GO:0055114|GO:0008839|GO:0009089|GO:0055114|GO:0009058|GO:0030170	Dihydrodipicolinate reductase signature.|Dihydrodipicolinate reductase, C-terminus|Aminotransferase class I and II	Phypoly-transcript-05905	0.172	SM1
Phypoly-transcript-05293	1.20244e-27	0.819658	0.975	0.879	1.81809e-23	0	DRKA_DICDI	GO:0005524|GO:0004672|GO:0005524|GO:0006468|GO:0004674|GO:0006468|GO:0004672|GO:0006468	Protein kinases ATP-binding region signature.|Protein kinase domain profile.|Serine/Threonine protein kinases active-site signature.|Protein tyrosine kinase	Phypoly-transcript-05293	0.096	SM1
Phypoly-transcript-08828	2.22129e-35	0.819602	0.98	0.798	3.35859e-31	0	EXOS4_HUMAN	GO:0008270|GO:0008270|GO:0008270	LIM domain profile.|LIM zinc-binding domain signature.|LIM domain	Phypoly-transcript-08828	0.182	SM1
Phypoly-transcript-17853	1.52196e-21	0.819474	0.914	0.636	2.3012e-17	0	COX11_ARATH	GO:0005507	962	Phypoly-transcript-17853	0.278	SM1
Phypoly-transcript-08997	1.76493e-23	0.819268	0.898	0.613	2.66858e-19	0	NUD12_BOVIN	GO:0016787|GO:0016787|GO:0016787|GO:0016787|GO:0046872|GO:0016787	NADH pyrophosphatase-like rudimentary NUDIX domain|Nudix hydrolase domain profile.|NUDIX domain|NADH pyrophosphatase zinc ribbon domain|Nudix box signature.	Phypoly-transcript-08997	0.285	SM1
Phypoly-transcript-07398	5.59602e-25	0.818597	0.944	0.668	8.46118e-21	0	BGL40_ARATH	GO:0004553|GO:0005975|GO:0004553|GO:0005975	Glycosyl hydrolase family 1|Glycosyl hydrolases family 1 N-terminal signature.	Phypoly-transcript-07398	0.276	SM1
Phypoly-transcript-01635	1.04729e-27	0.818465	0.964	0.85	1.5835e-23	0	DNLI3_HUMAN	GO:0003910|GO:0006281|GO:0006310	382	Phypoly-transcript-01635	0.114	SM1
Phypoly-transcript-02400	9.66703e-24	0.817235	0.924	0.63	1.46165e-19	0	EF2_ASHGO	GO:0005525|GO:0003924|GO:0005525|GO:0005525|GO:0003924|GO:0005525	Elongation factor Tu domain 2|GTP-binding elongation factors signature.|Elongation factor G, domain IV|Elongation factor Tu GTP binding domain	Phypoly-transcript-02400	0.294	SM1
Phypoly-transcript-08192	2.37071e-41	0.817089	0.98	0.844	3.58451e-37	0	H32_ENCAL	GO:0000786|GO:0003677|GO:0006334|GO:0003677|GO:0000786|GO:0003677|GO:0006334	Histone H3 signature 2.|Core histone H2A/H2B/H3/H4|Histone H3 signature 1.	Phypoly-transcript-08192	0.136	SM1
Phypoly-transcript-06391	1.83825e-23	0.816988	0.924	0.688	2.77943e-19	0	ENTB_SHIFL	GO:0003824|GO:0008152	2238	Phypoly-transcript-06391	0.236	SM1
Phypoly-transcript-01938	9.0377e-27	0.816807	0.985	0.853	1.3665e-22	0	TLDC2_HUMAN	GO:0016998	2375	Phypoly-transcript-01938	0.132	SM1
Phypoly-transcript-00878	2.05944e-25	0.816357	0.959	0.803	3.11388e-21	0	DHKA_DICDI	GO:0000156|GO:0000160|GO:0006355|GO:0005524|GO:0004871|GO:0007165|GO:0000155|GO:0007165|GO:0016020|GO:0004871|GO:0007165|GO:0000156|GO:0000160|GO:0006355	Response regulatory domain profile.|Histidine kinase-, DNA gyrase B-, and HSP90-like ATPase|PAS repeat profile.|His Kinase A (phospho-acceptor) domain|PAS domain|Response regulator receiver domain	Phypoly-transcript-00878	0.156	SM1
Phypoly-transcript-02407	7.06986e-26	0.816171	0.959	0.772	1.06896e-21	0	Y4WA_RHISN	GO:0004222|GO:0006508	2200	Phypoly-transcript-02407	0.187	SM1
Phypoly-transcript-05404	3.86378e-26	0.816169	0.949	0.795	5.84204e-22	0	UFD1_DROME	GO:0006511|GO:0005515|GO:0005515	Ubiquitin fusion degradation protein UFD1|Ubiquitin domain profile.|Ubiquitin family	Phypoly-transcript-05404	0.154	SM1
Phypoly-transcript-27128	6.25724e-24	0.816061	0.975	0.711	9.46095e-20	0	noGene	GO:0015078|GO:0015991|GO:0033179	403	Phypoly-transcript-27128	0.264	SM1
Phypoly-transcript-08061	6.85058e-18	0.815742	0.873	0.587	1.03581e-13	0	SNDH_GLULI	GO:0005975|GO:0016901|GO:0048038	1787	Phypoly-transcript-08061	0.286	SM1
Phypoly-transcript-12341	1.76669e-37	0.815597	0.975	0.855	2.67124e-33	0	RAB7A_DICDI	GO:0005525|GO:0007264	3588	Phypoly-transcript-12341	0.12	SM1
Phypoly-transcript-09693	6.40232e-29	0.815269	0.97	0.746	9.68031e-25	0	FAAA_HUMAN	GO:0004334|GO:0009072|GO:0003824|GO:0008152	Fumarylacetoacetase N-terminal|Fumarylacetoacetate (FAA) hydrolase family	Phypoly-transcript-09693	0.224	SM1
Phypoly-transcript-10814	1.20291e-27	0.815197	0.975	0.783	1.8188e-23	0	noGene	GO:0004553|GO:0005975	1884	Phypoly-transcript-10814	0.192	SM1
Phypoly-transcript-07031	4.77148e-18	0.815085	0.904	0.734	7.21448e-14	0	CK054_RAT	GO:0005634	1184	Phypoly-transcript-07031	0.17	SM1
Phypoly-transcript-22407	8.38384e-22	0.814928	0.939	0.708	1.26764e-17	0	EIF1A_MACFA	GO:0003723|GO:0003743|GO:0006413|GO:0003723|GO:0003743|GO:0006413	Translation initiation factor 1A / IF-1|S1 domain IF1 type profile.	Phypoly-transcript-22407	0.231	SM1
Phypoly-transcript-02613	3.2525e-25	0.814881	0.98	0.879	4.91778e-21	0	Y9849_DICDI	GO:0004672|GO:0005524|GO:0006468|GO:0004672|GO:0006468|GO:0005515|GO:0005515|GO:0005524|GO:0004674|GO:0006468	Protein kinase domain profile.|Protein tyrosine kinase|SAM domain profile.|Ankyrin repeat profile.|Protein kinases ATP-binding region signature.|Serine/Threonine protein kinases active-site signature.	Phypoly-transcript-02613	0.101	SM1
Phypoly-transcript-09209	2.29932e-22	0.814761	0.878	0.584	3.47658e-18	0	AATA_RHIME	GO:0009058|GO:0030170	264	Phypoly-transcript-09209	0.294	SM1
Phypoly-transcript-13058	9.2694e-23	0.814675	0.934	0.702	1.40153e-18	0	noGene	GO:0005515|GO:0005515|GO:0005515	TPR repeat region circular profile.|TPR repeat profile.|Tetratricopeptide repeat	Phypoly-transcript-13058	0.232	SM1
Phypoly-transcript-03436	3.92325e-25	0.814177	0.975	0.882	5.93195e-21	0	DRKB_DICDI	GO:0004672|GO:0006468|GO:0004674|GO:0006468|GO:0005515|GO:0005524|GO:0004672|GO:0005524|GO:0006468	Protein tyrosine kinase|Serine/Threonine protein kinases active-site signature.|IPT/TIG domain|Protein kinases ATP-binding region signature.|Protein kinase domain profile.	Phypoly-transcript-03436	0.093	SM1
Phypoly-transcript-11762	2.39981e-33	0.813037	0.98	0.884	3.62851e-29	0	F16P_DICDI	GO:0005975|GO:0042132|GO:0042578|GO:0005975|GO:0042578	Fructose-1-6-bisphosphatase|Fructose-1-6-bisphosphatase active site.	Phypoly-transcript-11762	0.096	SM1
Phypoly-transcript-16868	2.53205e-28	0.812386	0.964	0.725	3.82847e-24	0	ERD2_DROME	GO:0006621|GO:0016021|GO:0046923|GO:0006621|GO:0016021|GO:0046923|GO:0006621|GO:0016021|GO:0046923	ER lumen protein retaining receptor signature 2.|ER lumen protein retaining receptor signature 1.|ER lumen protein retaining receptor	Phypoly-transcript-16868	0.239	SM1
Phypoly-transcript-09416	8.31086e-20	0.812208	0.822	0.506	1.2566e-15	0	DIRC2_XENLA	GO:0016021|GO:0055085	2392	Phypoly-transcript-09416	0.316	SM1
Phypoly-transcript-08451	7.43692e-26	0.810518	0.919	0.575	1.12446e-21	0	GDL88_ARATH	GO:0006629|GO:0016788	1756	Phypoly-transcript-08451	0.344	SM1
Phypoly-transcript-03504	1.52354e-27	0.81047	0.924	0.572	2.30359e-23	0	noGene	GO:0005509	1376	Phypoly-transcript-03504	0.352	SM1
Phypoly-transcript-05051	3.79523e-21	0.809608	0.949	0.841	5.73839e-17	0	STK11_DICDI	GO:0004672|GO:0005524|GO:0006468|GO:0004674|GO:0006468|GO:0004672|GO:0005524|GO:0006468|GO:0005524	Protein kinase domain profile.|Serine/Threonine protein kinases active-site signature.|Protein kinase domain|Protein kinases ATP-binding region signature.	Phypoly-transcript-05051	0.108	SM1
Phypoly-transcript-02823	5.0372e-26	0.809201	0.944	0.824	7.61625e-22	0	PURCE_DICDI	GO:0006189|GO:0005524|GO:0046872|GO:0004639|GO:0006164	AIR carboxylase|ATP-grasp fold profile.|SAICAR synthetase signature 1.	Phypoly-transcript-02823	0.12	SM1
Phypoly-transcript-13052	4.67556e-21	0.808073	0.939	0.665	7.06944e-17	0	RASG_DICDI	GO:0005525|GO:0007264|GO:0003924|GO:0005525|GO:0006184|GO:0007165|GO:0016020	Ras family|small GTPase Ras family profile.	Phypoly-transcript-13052	0.274	SM1
Phypoly-transcript-04271	2.92295e-27	0.808039	0.98	0.827	4.4195e-23	0	TM9S3_HUMAN	GO:0016021	1415	Phypoly-transcript-04271	0.153	SM1
Phypoly-transcript-03464	7.98279e-32	0.807233	0.98	0.847	1.207e-27	0	TO401_ARATH	GO:0005515|GO:0005515|GO:0005515	Trp-Asp (WD) repeats circular profile.|Trp-Asp (WD) repeats profile.|WD domain, G-beta repeat	Phypoly-transcript-03464	0.133	SM1
Phypoly-transcript-03310	2.9112e-25	0.806931	0.975	0.899	4.40174e-21	0	MSS4_YEAST	GO:0005515|GO:0016307|GO:0046488|GO:0016307|GO:0046488	Leucine-rich repeat profile.|Phosphatidylinositol phosphate kinase (PIPK) domain profile.|Phosphatidylinositol-4-phosphate 5-Kinase	Phypoly-transcript-03310	0.076	SM1
Phypoly-transcript-01979	1.94337e-34	0.806733	0.975	0.853	2.93837e-30	0	FAT2_SCHPO	GO:0003824|GO:0008152	277	Phypoly-transcript-01979	0.122	SM1
Phypoly-transcript-07219	9.40808e-22	0.804964	0.934	0.723	1.4225e-17	0	TYDC1_ORYSJ	GO:0016831|GO:0019752|GO:0030170	3525	Phypoly-transcript-07219	0.211	SM1
Phypoly-transcript-05425	1.26178e-22	0.804681	0.934	0.757	1.9078e-18	0	PHG1B_DICDI	GO:0016021	1415	Phypoly-transcript-05425	0.177	SM1
Phypoly-transcript-07418	1.05628e-27	0.804242	0.599	0.15	1.5971e-23	0	YR831_MIMIV	GO:0004672|GO:0005524|GO:0006468|GO:0004672|GO:0006468	Protein kinase domain profile.|Protein tyrosine kinase	Phypoly-transcript-07418	0.449	SM1
Phypoly-transcript-06019	3.79105e-30	0.804188	0.964	0.806	5.73207e-26	0	TRI56_HUMAN	GO:0046872|GO:0005515|GO:0008270	Zinc finger, C3HC4 type (RING finger)|Zinc finger RING-type profile.	Phypoly-transcript-06019	0.158	SM1
Phypoly-transcript-18003	9.58932e-20	0.803804	0.822	0.483	1.44991e-15	0	noGene	GO:0005515	1532	Phypoly-transcript-18003	0.339	SM1
Phypoly-transcript-24809	3.8725e-34	0.803197	0.985	0.916	5.85522e-30	0	noGene	GO:0000287|GO:0010333|GO:0016829	4359	Phypoly-transcript-24809	0.069	SM1
Phypoly-transcript-08475	1.40767e-26	0.802804	0.975	0.775	2.1284e-22	0	CLS_CLOP1	GO:0003824|GO:0008152	3054	Phypoly-transcript-08475	0.2	SM1
Phypoly-transcript-22997	8.84526e-24	0.80257	0.975	0.74	1.3374e-19	0	RPB11_DICDI	GO:0003677|GO:0003899|GO:0006351	3929	Phypoly-transcript-22997	0.235	SM1
Phypoly-transcript-11466	3.6625e-28	0.801939	0.97	0.728	5.53769e-24	0	FCL_DICDI	GO:0003824|GO:0044237|GO:0050662	2657	Phypoly-transcript-11466	0.242	SM1
Phypoly-transcript-01882	1.21889e-28	0.801033	0.985	0.858	1.84296e-24	0	PI4KB_SORAR	GO:0016773|GO:0016773|GO:0016773|GO:0016773	Phosphatidylinositol 3- and 4-kinase|Phosphatidylinositol 3- and 4-kinases family profile.|Phosphatidylinositol 3- and 4-kinases signature 1.|Phosphatidylinositol 3- and 4-kinases signature 2.	Phypoly-transcript-01882	0.127	SM1
Phypoly-transcript-05495	7.60024e-26	0.800743	0.959	0.737	1.14916e-21	0	YR665_MIMIV	GO:0008152|GO:0016491	4110	Phypoly-transcript-05495	0.222	SM1
Phypoly-transcript-11018	4.31199e-21	0.800681	0.878	0.63	6.51973e-17	0	PTH2_HUMAN	GO:0004721|GO:0004725|GO:0004725|GO:0016311|GO:0016791|GO:0016311|GO:0016791	Cyclin-dependent kinase inhibitor 3 (CDKN3)|Tyrosine specific protein phosphatases active site.|Tyrosine specific protein phosphatases family profile.	Phypoly-transcript-11018	0.248	SM1
Phypoly-transcript-03191	2.44279e-24	0.800479	0.959	0.786	3.6935e-20	0	ERCC3_DICDI	GO:0003677|GO:0005524|GO:0016787|GO:0003676|GO:0004386|GO:0005524|GO:0003676|GO:0004386|GO:0005524	Type III restriction enzyme, res subunit|Helicase conserved C-terminal domain|Superfamilies 1 and 2 helicase C-terminal domain profile.	Phypoly-transcript-03191	0.173	SM1
Phypoly-transcript-24190	1.88727e-37	0.800188	0.985	0.835	2.85356e-33	0	THIO1_DICDI	GO:0045454|GO:0045454	Thioredoxin|Thioredoxin family active site.	Phypoly-transcript-24190	0.15	SM1
Phypoly-transcript-06531	1.78223e-27	0.800153	0.97	0.827	2.69473e-23	0	LINC_SPHPI	GO:0008152|GO:0016491	4110	Phypoly-transcript-06531	0.143	SM1
Phypoly-transcript-17468	2.19317e-34	0.799985	0.98	0.806	3.31608e-30	0	UBE2N_RAT	GO:0016881|GO:0016881	Ubiquitin-conjugating enzyme|Ubiquitin-conjugating enzymes family profile.	Phypoly-transcript-17468	0.174	SM1
Phypoly-transcript-11177	1.39274e-28	0.799491	0.959	0.78	2.10582e-24	0	FACE2_DROME	GO:0016020	590	Phypoly-transcript-11177	0.179	SM1
Phypoly-transcript-08138	1.29491e-30	0.799208	0.98	0.853	1.9579e-26	0	C524A_DICDI	GO:0005506|GO:0016705|GO:0020037|GO:0055114|GO:0016705|GO:0055114	Cytochrome P450|Cytochrome P450 cysteine heme-iron ligand signature.	Phypoly-transcript-08138	0.127	SM1
Phypoly-transcript-07183	1.42176e-24	0.798878	0.929	0.702	2.14971e-20	0	PISD_PONAB	GO:0004609|GO:0008654	3023	Phypoly-transcript-07183	0.227	SM1
Phypoly-transcript-08166	4.92453e-29	0.79883	0.975	0.772	7.44589e-25	0	noGene	GO:0016021|GO:0055085	2392	Phypoly-transcript-08166	0.203	SM1
Phypoly-transcript-13436	2.22563e-25	0.798392	0.97	0.792	3.36515e-21	0	FABG_THEMA	GO:0008152|GO:0016491|GO:0016491	short chain dehydrogenase|Short-chain dehydrogenases/reductases family signature.	Phypoly-transcript-13436	0.178	SM1
Phypoly-transcript-11623	3.6352e-30	0.798195	0.985	0.861	5.49643e-26	0	SFXN_DICDI	GO:0006812|GO:0008324|GO:0016020|GO:0055085	4556	Phypoly-transcript-11623	0.124	SM1
Phypoly-transcript-00254	3.34057e-29	0.797325	0.98	0.931	5.05094e-25	0	noGene	GO:0005083	807	Phypoly-transcript-00254	0.049	SM1
Phypoly-transcript-18923	2.08838e-24	0.796986	0.97	0.751	3.15762e-20	0	PFPI_PYRFU	GO:0016798	2978	Phypoly-transcript-18923	0.219	SM1
Phypoly-transcript-19477	6.73493e-10	0.796739	0.538	0.289	1.01832e-05	0	noGene	GO:0005515	1532	Phypoly-transcript-19477	0.249	SM1
Phypoly-transcript-01808	5.83679e-33	0.796674	0.99	0.96	8.82523e-29	0	GNAI1_RAT	GO:0005515	4454	Phypoly-transcript-01808	0.03	SM1
Phypoly-transcript-04113	1.76427e-29	0.796656	0.985	0.847	2.66758e-25	0	MGP3_DICDI	GO:0003824|GO:0008152	277	Phypoly-transcript-04113	0.138	SM1
Phypoly-transcript-02726	6.35379e-27	0.796494	0.975	0.847	9.60693e-23	0	PTBP1_RAT	GO:0003676|GO:0003676	Eukaryotic RNA Recognition Motif (RRM) profile.|RNA recognition motif. (a.k.a. RRM, RBD, or RNP domain)	Phypoly-transcript-02726	0.128	SM1
Phypoly-transcript-27615	4.72392e-24	0.796112	0.964	0.746	7.14257e-20	0	VATF_DICDI	GO:0034220	389	Phypoly-transcript-27615	0.218	SM1
Phypoly-transcript-13225	1.77856e-23	0.79602	0.954	0.783	2.68918e-19	0	TRPT1_MOUSE	GO:0006388|GO:0016772	3876	Phypoly-transcript-13225	0.171	SM1
Phypoly-transcript-06669	9.51083e-28	0.795752	0.97	0.85	1.43804e-23	0	NDRB_DICDI	GO:0004674|GO:0006468|GO:0004672|GO:0005524|GO:0006468|GO:0004672|GO:0005524|GO:0006468|GO:0004674|GO:0005524|GO:0006468|GO:0005524	Serine/Threonine protein kinases active-site signature.|Protein kinase domain|Protein kinase domain profile.|AGC-kinase C-terminal domain profile.|Protein kinases ATP-binding region signature.	Phypoly-transcript-06669	0.12	SM1
Phypoly-transcript-07330	2.14797e-16	0.795678	0.893	0.679	3.24774e-12	0	VAC8_KLULA	GO:0005515|GO:0005515	Armadillo/beta-catenin-like repeat|Armadillo/plakoglobin ARM repeat profile.	Phypoly-transcript-07330	0.214	SM1
Phypoly-transcript-05149	9.02515e-24	0.795569	0.929	0.699	1.3646e-19	0	NSDHL_BOVIN	GO:0003854|GO:0006694|GO:0016616|GO:0055114	26	Phypoly-transcript-05149	0.23	SM1
Phypoly-transcript-09810	6.01375e-24	0.795528	0.975	0.777	9.09278e-20	0	MMK1_MEDSA	GO:0004672|GO:0005524|GO:0006468|GO:0004674|GO:0006468|GO:0005524|GO:0004707|GO:0005524|GO:0006468|GO:0004672|GO:0005524|GO:0006468	Protein kinase domain|Serine/Threonine protein kinases active-site signature.|Protein kinases ATP-binding region signature.|MAP kinase signature.|Protein kinase domain profile.	Phypoly-transcript-09810	0.198	SM1
Phypoly-transcript-12267	2.347e-24	0.795348	0.954	0.662	3.54866e-20	0	EI2BB_DICDI	GO:0044237	2182	Phypoly-transcript-12267	0.292	SM1
Phypoly-transcript-19306	5.97578e-19	0.795167	0.848	0.558	9.03538e-15	0	EF1G3_ORYSJ	GO:0005515|GO:0005515	Soluble glutathione S-transferase N-terminal domain profile.|Glutathione S-transferase, N-terminal domain	Phypoly-transcript-19306	0.29	SM1
Phypoly-transcript-05914	3.39474e-22	0.79501	0.954	0.792	5.13285e-18	0	UGPA1_DICDI	GO:0008152|GO:0016779	4793	Phypoly-transcript-05914	0.162	SM1
Phypoly-transcript-13474	3.32499e-26	0.79497	0.98	0.786	5.02738e-22	0	CXIP4_ARATH	GO:0003676|GO:0008270	4961	Phypoly-transcript-13474	0.194	SM1
Phypoly-transcript-02879	1.51986e-28	0.794814	0.954	0.824	2.29804e-24	0	SPXS1_DICDI	GO:0016021|GO:0016021	EXS domain profile.|EXS family	Phypoly-transcript-02879	0.13	SM1
Phypoly-transcript-06134	4.64274e-29	0.794496	0.98	0.827	7.01982e-25	0	Y1676_DICDI	GO:0005515|GO:0007165	Src homology 3 (SH3) domain profile.|Hr1 repeat	Phypoly-transcript-06134	0.153	SM1
Phypoly-transcript-04061	7.47842e-25	0.794495	0.98	0.838	1.13074e-20	0	AGD14_ARATH	GO:0008060|GO:0008270|GO:0032312|GO:0008060|GO:0008270|GO:0032312	ARF GTPase-activating proteins domain profile.|Putative GTPase activating protein for Arf	Phypoly-transcript-04061	0.142	SM1
Phypoly-transcript-02065	1.62926e-27	0.79421	0.97	0.841	2.46344e-23	0	T23O_DICDI	GO:0004833|GO:0019441|GO:0020037	4604	Phypoly-transcript-02065	0.129	SM1
Phypoly-transcript-04413	7.45809e-27	0.794146	0.97	0.809	1.12766e-22	0	AIFM3_HUMAN	GO:0016491|GO:0051537|GO:0055114|GO:0016491|GO:0055114|GO:0016491|GO:0051537|GO:0055114|GO:0016491|GO:0050660|GO:0055114	Rieske [2Fe-2S] domain|Pyridine nucleotide-disulphide oxidoreductase|Rieske [2Fe-2S] iron-sulfur domain profile.|Pyridine nucleotide-disulphide oxidoreductase	Phypoly-transcript-04413	0.161	SM1
Phypoly-transcript-08744	2.04114e-27	0.793221	0.954	0.789	3.0862e-23	0	EDA2_ARATH	GO:0006508|GO:0008236	4068	Phypoly-transcript-08744	0.165	SM1
Phypoly-transcript-10054	6.52162e-27	0.793011	0.97	0.864	9.86068e-23	0	PCY2_DICDI	GO:0003824|GO:0009058	947	Phypoly-transcript-10054	0.106	SM1
Phypoly-transcript-06568	2.08785e-25	0.793005	0.909	0.63	3.15683e-21	0	SYP_GEODF	GO:0000166|GO:0004812|GO:0005524|GO:0006418|GO:0004812|GO:0006418	tRNA synthetase class II core domain (G, H, P, S and T)|Aminoacyl-transfer RNA synthetases class-II family profile.	Phypoly-transcript-06568	0.279	SM1
Phypoly-transcript-01453	6.62982e-26	0.7929	0.985	0.942	1.00243e-21	0	XPO7_CHICK	GO:0006886|GO:0008536|GO:0006886|GO:0008536	Importin-beta N-terminal domain|Importin-beta N-terminal domain profile.	Phypoly-transcript-01453	0.043	SM1
Phypoly-transcript-11031	1.0907e-25	0.792754	0.954	0.737	1.64914e-21	0	NSF1C_CHICK	GO:0005515|GO:0005515|GO:0005515	Ubiquitin domain profile.|UBX domain|UBX domain profile.	Phypoly-transcript-11031	0.217	SM1
Phypoly-transcript-11237	3.75179e-22	0.792395	0.863	0.52	5.67271e-18	0	BDLP_NOSP7	GO:0004672|GO:0005524|GO:0006468|GO:0004672|GO:0005524|GO:0006468|GO:0005524	Protein kinase domain profile.|Protein kinase domain|Protein kinases ATP-binding region signature.	Phypoly-transcript-11237	0.343	SM1
Phypoly-transcript-13254	7.33027e-23	0.791503	0.944	0.757	1.10834e-18	0	STX16_MOUSE	GO:0016020|GO:0005515|GO:0005484|GO:0006886|GO:0016020|GO:0005515	Syntaxin|t-SNARE coiled-coil homology domain profile.|Syntaxin / epimorphin family signature.|SNARE domain	Phypoly-transcript-13254	0.187	SM1
Phypoly-transcript-13613	3.40552e-39	0.791367	0.975	0.757	5.14915e-35	0	ATPO_DROME	GO:0015986|GO:0046933	397	Phypoly-transcript-13613	0.218	SM1
Phypoly-transcript-09840	1.41799e-18	0.790581	0.827	0.488	2.14399e-14	0	DNLI_HAEIN	GO:0003910|GO:0005524|GO:0006281|GO:0006310|GO:0003909|GO:0051103	ATP dependent DNA ligase domain|ATP-dependent DNA ligase signature 2.	Phypoly-transcript-09840	0.339	SM1
Phypoly-transcript-07180	2.21411e-22	0.79048	0.939	0.76	3.34773e-18	0	SNUT2_MOUSE	GO:0008270|GO:0004221|GO:0006511|GO:0008270	Zinc finger UBP-type profile.|Ubiquitin carboxyl-terminal hydrolase|Zn-finger in ubiquitin-hydrolases and other protein	Phypoly-transcript-07180	0.179	SM1
Phypoly-transcript-08214	4.41361e-23	0.79042	0.838	0.52	6.67337e-19	0	noGene	GO:0003910|GO:0005524|GO:0006281|GO:0006310	383	Phypoly-transcript-08214	0.318	SM1
Phypoly-transcript-05800	6.90978e-27	0.790216	0.964	0.806	1.04476e-22	0	DHAK_DICDI	GO:0004371|GO:0006071|GO:0004371|GO:0006071|GO:0004371|GO:0006071|GO:0004371|GO:0006071	DhaL domain profile.|DAK2 domain|DhaK domain profile.|Dak1 domain	Phypoly-transcript-05800	0.158	SM1
Phypoly-transcript-29889	1.31016e-26	0.789924	0.975	0.743	1.98096e-22	0	RB11C_DICDI	GO:0005525|GO:0007264	3588	Phypoly-transcript-29889	0.232	SM1
Phypoly-transcript-27547	1.17296e-24	0.789688	0.944	0.662	1.77351e-20	0	CYB5_CANTR	GO:0020037|GO:0020037	Cytochrome b5 family, heme-binding domain profile.|Cytochrome b5-like Heme/Steroid binding domain	Phypoly-transcript-27547	0.282	SM1
Phypoly-transcript-10164	7.14696e-27	0.789355	0.975	0.792	1.08062e-22	0	IDSA_METJA	GO:0008299|GO:0008299	Polyprenyl synthases signature 1.|Polyprenyl synthetase	Phypoly-transcript-10164	0.183	SM1
Phypoly-transcript-02801	2.81867e-24	0.789232	0.975	0.85	4.26183e-20	0	PAN3_DICDI	GO:0004672|GO:0005524|GO:0006468|GO:0004672|GO:0005524|GO:0006468	Protein kinase domain profile.|Protein kinase domain	Phypoly-transcript-02801	0.125	SM1
Phypoly-transcript-13450	3.6014e-22	0.787996	0.949	0.783	5.44532e-18	0	NADA_APLCA	GO:0003953	174	Phypoly-transcript-13450	0.166	SM1
Phypoly-transcript-03744	6.42699e-29	0.787919	0.98	0.847	9.71761e-25	0	noGene	GO:0004888|GO:0007166|GO:0016020|GO:0005515|GO:0004930|GO:0007186|GO:0016021|GO:0005515	G-protein coupled receptors family 2 profile 2.|Frizzled (fz) domain profile.|7 transmembrane receptor (Secretin family)|Fz domain	Phypoly-transcript-03744	0.133	SM1
Phypoly-transcript-16799	4.38599e-24	0.78732	0.959	0.72	6.63162e-20	0	RAB2_LYMST	GO:0005525|GO:0007264	3588	Phypoly-transcript-16799	0.239	SM1
Phypoly-transcript-05019	9.377e-27	0.787278	0.98	0.896	1.4178e-22	0	PARG_BOVIN	GO:0004649|GO:0005975	3130	Phypoly-transcript-05019	0.084	SM1
Phypoly-transcript-24130	6.66638e-24	0.787248	0.919	0.691	1.00796e-19	0	VF307_IIV3	GO:0003910|GO:0005524|GO:0006281|GO:0006310|GO:0003909|GO:0051103|GO:0003910|GO:0005524|GO:0006281|GO:0006310	ATP-dependent DNA ligase family profile.|ATP-dependent DNA ligase signature 2.|ATP dependent DNA ligase domain	Phypoly-transcript-24130	0.228	SM1
Phypoly-transcript-19556	1.9291e-25	0.786578	0.97	0.725	2.9168e-21	0	NCS1_RAT	GO:0005509|GO:0005509|GO:0005509|GO:0005509	EF-hand domain|EF-hand calcium-binding domain profile.|EF hand|EF-hand domain pair	Phypoly-transcript-19556	0.245	SM1
Phypoly-transcript-17502	1.50793e-29	0.786282	0.98	0.882	2.28e-25	0	PB1_HUMAN	GO:0008270	2157	Phypoly-transcript-17502	0.098	SM1
Phypoly-transcript-18948	4.94308e-24	0.786105	0.97	0.763	7.47394e-20	0	SPCS3_DICDI	GO:0005787|GO:0006465|GO:0008233|GO:0016021	4118	Phypoly-transcript-18948	0.207	SM1
Phypoly-transcript-16106	2.60238e-23	0.785877	0.97	0.76	3.9348e-19	0	SM16_SCHMA	GO:0005509|GO:0005509	EF-hand calcium-binding domain profile.|EF-hand domain pair	Phypoly-transcript-16106	0.21	SM1
Phypoly-transcript-13584	3.91626e-20	0.785761	0.858	0.546	5.92139e-16	0	noGene	GO:0016020	1366	Phypoly-transcript-13584	0.312	SM1
Phypoly-transcript-08950	9.08222e-19	0.785645	0.797	0.523	1.37323e-14	0	RBFA_PHEZH	GO:0006364|GO:0006364	Ribosome-binding factor A signature.|Ribosome-binding factor A	Phypoly-transcript-08950	0.274	SM1
Phypoly-transcript-09415	2.65327e-27	0.785119	0.97	0.838	4.01174e-23	0	VAPA_PONAB	GO:0005198|GO:0005198	Major sperm protein (MSP) domain profile.|MSP (Major sperm protein) domain	Phypoly-transcript-09415	0.132	SM1
Phypoly-transcript-14895	3.65231e-27	0.784937	0.975	0.806	5.5223e-23	0	UDP_HAEIN	GO:0003824|GO:0009116	3074	Phypoly-transcript-14895	0.169	SM1
Phypoly-transcript-09238	2.44738e-34	0.784716	0.98	0.78	3.70044e-30	0	TABA_PSESZ	GO:0003824|GO:0003824	Pyridoxal-dependent decarboxylase, C-terminal sheet domain|Pyridoxal-dependent decarboxylase, pyridoxal binding domain	Phypoly-transcript-09238	0.2	SM1
Phypoly-transcript-07331	2.76225e-26	0.784701	0.98	0.754	4.17653e-22	0	UCHL5_PIG	GO:0004221|GO:0005622|GO:0006511	4674	Phypoly-transcript-07331	0.226	SM1
Phypoly-transcript-04524	4.02204e-28	0.784481	0.944	0.746	6.08133e-24	0	PIMT1_METAC	GO:0004719|GO:0006464|GO:0005515|GO:0008270|GO:0005515|GO:0008270	Protein-L-isoaspartate(D-aspartate) O-methyltransferase (PCMT)|Zinc finger RING-type profile.|Ring finger domain	Phypoly-transcript-04524	0.198	SM1
Phypoly-transcript-11460	7.48222e-28	0.783995	0.964	0.728	1.13131e-23	0	KCTD5_MOUSE	GO:0051260	553	Phypoly-transcript-11460	0.236	SM1
Phypoly-transcript-18237	2.47989e-23	0.783593	0.934	0.679	3.74959e-19	0	CHMP4_DICDI	GO:0015031	4171	Phypoly-transcript-18237	0.255	SM1
Phypoly-transcript-06930	9.58154e-26	0.783524	0.975	0.757	1.44873e-21	0	TPP1_MACFA	GO:0004252|GO:0006508|GO:0008236	Subtilase family|Pro-kumamolisin, activation domain	Phypoly-transcript-06930	0.218	SM1
Phypoly-transcript-06526	8.26869e-29	0.783448	0.97	0.795	1.25023e-24	0	HACL1_HUMAN	GO:0000287|GO:0030976|GO:0000287|GO:0030976|GO:0030976|GO:0003824|GO:0030976	Thiamine pyrophosphate enzymes signature.|Thiamine pyrophosphate enzyme, central domain|Thiamine pyrophosphate enzyme, N-terminal TPP binding domain|Thiamine pyrophosphate enzyme, C-terminal TPP binding domain	Phypoly-transcript-06526	0.175	SM1
Phypoly-transcript-01287	1.94452e-30	0.782849	0.985	0.896	2.94012e-26	0	DDB1A_ARATH	GO:0003676|GO:0005634	882	Phypoly-transcript-01287	0.089	SM1
Phypoly-transcript-05882	2.75923e-24	0.782706	0.975	0.809	4.17196e-20	0	STK4_DICDI	GO:0004672|GO:0005524|GO:0006468|GO:0004672|GO:0005524|GO:0006468|GO:0007165|GO:0005524	Protein kinase domain|Protein kinase domain profile.|SARAH domain profile.|Protein kinases ATP-binding region signature.	Phypoly-transcript-05882	0.166	SM1
Phypoly-transcript-10161	2.79802e-19	0.7826	0.868	0.627	4.2306e-15	0	TTL_SCHPO	GO:0006464|GO:0006464	Tubulin-tyrosine ligase family|TTL domain profile.	Phypoly-transcript-10161	0.241	SM1
Phypoly-transcript-15687	4.65496e-26	0.782568	0.97	0.711	7.0383e-22	0	RB11C_DICDI	GO:0005525|GO:0007264	3588	Phypoly-transcript-15687	0.259	SM1
Phypoly-transcript-03576	9.51696e-23	0.781319	0.904	0.639	1.43896e-18	0	DNLI_HAEIN	GO:0003910|GO:0005524|GO:0006281|GO:0006310	383	Phypoly-transcript-03576	0.265	SM1
Phypoly-transcript-16945	1.26849e-21	0.780456	0.914	0.717	1.91796e-17	0	noGene	GO:0004553|GO:0016052|GO:0030246	1163	Phypoly-transcript-16945	0.197	SM1
Phypoly-transcript-00735	4.83743e-30	0.780361	0.985	0.876	7.31419e-26	0	ABCC3_DICDI	GO:0005524|GO:0016887|GO:0005524|GO:0016887|GO:0005524|GO:0006810|GO:0016021|GO:0042626|GO:0055085|GO:0005524|GO:0016887|GO:0005524|GO:0006810|GO:0016021|GO:0042626|GO:0055085	ATP-binding cassette, ABC transporter-type domain profile.|ABC transporters family signature.|ABC transporter integral membrane type-1 fused domain profile.|ABC transporter|ABC transporter transmembrane region	Phypoly-transcript-00735	0.109	SM1
Phypoly-transcript-17392	1.51941e-21	0.780266	0.939	0.792	2.29735e-17	0	RB3GP_DANRE	GO:0005097	3556	Phypoly-transcript-17392	0.147	SM1
Phypoly-transcript-17995	3.3988e-26	0.780071	0.954	0.725	5.13899e-22	0	noGene	GO:0003924|GO:0004871|GO:0007186|GO:0019001|GO:0031683|GO:0005515	G-protein alpha subunit|F-box domain	Phypoly-transcript-17995	0.229	SM1
Phypoly-transcript-06321	7.14484e-28	0.779859	0.98	0.832	1.0803e-23	0	ASM_BOVIN	GO:0016787	597	Phypoly-transcript-06321	0.148	SM1
Phypoly-transcript-13280	3.60276e-17	0.779691	0.853	0.543	5.44737e-13	0	YQK1_SCHPO	GO:0016491|GO:0016706|GO:0055114|GO:0016491|GO:0016706|GO:0055114	2OG-Fe(II) oxygenase superfamily|Fe(2+) 2-oxoglutarate dioxygenase domain profile.	Phypoly-transcript-13280	0.31	SM1
Phypoly-transcript-14744	2.60431e-13	0.77966	0.822	0.607	3.93772e-09	0	LRC40_MOUSE	GO:0005515|GO:0005515	Leucine-rich repeat profile.|Leucine Rich Repeat	Phypoly-transcript-14744	0.215	SM1
Phypoly-transcript-19418	8.90565e-23	0.77955	0.934	0.691	1.34653e-18	0	GSTP1_CRIMI	GO:0005515|GO:0005515	Glutathione S-transferase, N-terminal domain|Soluble glutathione S-transferase N-terminal domain profile.	Phypoly-transcript-19418	0.243	SM1
Phypoly-transcript-04416	1.46643e-30	0.779388	0.97	0.801	2.21724e-26	0	ABCB5_DICDI	GO:0005524|GO:0006810|GO:0016021|GO:0042626|GO:0055085|GO:0005524|GO:0016887|GO:0005524|GO:0016887|GO:0005524|GO:0016887|GO:0005524|GO:0006810|GO:0016021|GO:0042626|GO:0055085	ABC transporter transmembrane region|ABC transporters family signature.|ABC transporter|ATP-binding cassette, ABC transporter-type domain profile.|ABC transporter integral membrane type-1 fused domain profile.	Phypoly-transcript-04416	0.169	SM1
Phypoly-transcript-11147	4.1638e-28	0.779169	0.812	0.416	6.29567e-24	0	COTR_BACSU	GO:0006629	2894	Phypoly-transcript-11147	0.396	SM1
Phypoly-transcript-06151	5.17313e-30	0.77908	0.985	0.855	7.82178e-26	0	DGP10_ARATH	GO:0005515	2911	Phypoly-transcript-06151	0.13	SM1
Phypoly-transcript-12562	1.47878e-23	0.778653	0.939	0.697	2.23592e-19	0	UBL4A_XENLA	GO:0006950|GO:0005515|GO:0005515	TerD domain|Ubiquitin domain profile.|Ubiquitin family	Phypoly-transcript-12562	0.242	SM1
Phypoly-transcript-10531	4.04905e-30	0.778287	0.975	0.775	6.12217e-26	0	VATC_MANSE	GO:0015078|GO:0015991|GO:0033180	4805	Phypoly-transcript-10531	0.2	SM1
Phypoly-transcript-01389	8.4032e-29	0.777811	0.98	0.913	1.27056e-24	0	P2C59_ARATH	GO:0003824	3432	Phypoly-transcript-01389	0.067	SM1
Phypoly-transcript-11877	1.39272e-22	0.777299	0.97	0.783	2.10579e-18	0	STIP1_DICDI	GO:0005515	4454	Phypoly-transcript-11877	0.187	SM1
Phypoly-transcript-05447	7.35159e-30	0.777262	0.995	0.934	1.11156e-25	0	RAP1_CAEEL	GO:0005525|GO:0007264|GO:0003924|GO:0005525|GO:0006184|GO:0007165|GO:0016020	Ras family|small GTPase Ras family profile.	Phypoly-transcript-05447	0.061	SM1
Phypoly-transcript-06330	5.47559e-28	0.776603	0.975	0.838	8.27909e-24	0	CAT1_SCHPO	GO:0006810|GO:0016020|GO:0055085|GO:0006865|GO:0016021|GO:0055085	Amino acid permease|Amino acid permeases signature.	Phypoly-transcript-06330	0.137	SM1
Phypoly-transcript-02551	6.22139e-26	0.776556	0.98	0.867	9.40674e-22	0	EBDG_STRAW	GO:0004553|GO:0005975|GO:0004553|GO:0005975	Glycosyl hydrolases family 2, sugar binding domain|Glycosyl hydrolases family 2	Phypoly-transcript-02551	0.113	SM1
Phypoly-transcript-21799	3.22467e-26	0.776385	0.949	0.697	4.8757e-22	0	noGene	GO:0005515|GO:0005515	FCP1 homology domain profile.|NLI interacting factor-like phosphatase	Phypoly-transcript-21799	0.252	SM1
Phypoly-transcript-18985	3.63434e-24	0.775763	0.964	0.702	5.49513e-20	0	CANB1_DICDI	GO:0005509|GO:0005509	EF-hand calcium-binding domain profile.|EF-hand domain pair	Phypoly-transcript-18985	0.262	SM1
Phypoly-transcript-20559	2.73398e-20	0.775523	0.858	0.581	4.13378e-16	0	CYSI_NITWN	GO:0016491|GO:0020037|GO:0051536|GO:0055114	2716	Phypoly-transcript-20559	0.277	SM1
Phypoly-transcript-07849	2.65415e-31	0.775492	0.985	0.821	4.01308e-27	0	HMCSA_DICDI	GO:0004421|GO:0008299|GO:0004421|GO:0008299	Hydroxymethylglutaryl-coenzyme A synthase C terminal|Hydroxymethylglutaryl-coenzyme A synthase N terminal	Phypoly-transcript-07849	0.164	SM1
Phypoly-transcript-04870	3.43255e-31	0.77534	0.975	0.832	5.19001e-27	0	PAP1A_DICDI	GO:0003676|GO:0003723|GO:0003676|GO:0003723	Eukaryotic RNA Recognition Motif (RRM) profile.|Poly(A)-binding protein C-terminal (PABC) domain profile.|RNA recognition motif. (a.k.a. RRM, RBD, or RNP domain)|Poly-adenylate binding protein, unique domain	Phypoly-transcript-04870	0.143	SM1
Phypoly-transcript-10962	2.58772e-26	0.775136	0.964	0.775	3.91263e-22	0	noGene	GO:0016021|GO:0055085	4182	Phypoly-transcript-10962	0.189	SM1
Phypoly-transcript-06513	8.14187e-16	0.774887	0.838	0.595	1.23105e-11	0	RNF14_HUMAN	GO:0005515|GO:0005515|GO:0008270|GO:0005515|GO:0008270	RWD domain profile.|Zinc finger RING-type profile.|RWD domain|IBR domain	Phypoly-transcript-06513	0.243	SM1
Phypoly-transcript-08303	1.0348e-30	0.774417	0.985	0.87	1.56462e-26	0	RNG1L_ARATH	GO:0005515|GO:0008270|GO:0005515|GO:0008270	Zinc finger RING-type profile.|Ring finger domain	Phypoly-transcript-08303	0.115	SM1
Phypoly-transcript-11493	8.63274e-19	0.774324	0.893	0.717	1.30527e-14	0	GPA2_DICDI	GO:0003924|GO:0004871|GO:0007186|GO:0019001|GO:0031683	1706	Phypoly-transcript-11493	0.176	SM1
Phypoly-transcript-03786	9.06833e-19	0.774081	0.868	0.616	1.37113e-14	0	DNLI_HAEIN	GO:0003910|GO:0005524|GO:0006281|GO:0006310	383	Phypoly-transcript-03786	0.252	SM1
Phypoly-transcript-03154	1.09602e-27	0.773668	0.99	0.899	1.65718e-23	0	DNLI_HAEIN	GO:0003910|GO:0005524|GO:0006281|GO:0006310	383	Phypoly-transcript-03154	0.091	SM1
Phypoly-transcript-30468	3.7174e-26	0.773517	0.97	0.688	5.6207e-22	0	PR19A_ARATH	GO:0005515	4874	Phypoly-transcript-30468	0.282	SM1
Phypoly-transcript-18971	1.05099e-18	0.773223	0.904	0.699	1.58909e-14	0	CALM_SCHPO	GO:0005509|GO:0005509	EF-hand domain pair|EF-hand calcium-binding domain profile.	Phypoly-transcript-18971	0.205	SM1
Phypoly-transcript-06047	1.81886e-23	0.772748	0.959	0.708	2.75011e-19	0	DST1_DICDI	GO:0005524|GO:0004672|GO:0005524|GO:0006468|GO:0004672|GO:0005524|GO:0006468	Protein kinases ATP-binding region signature.|Protein kinase domain|Protein kinase domain profile.	Phypoly-transcript-06047	0.251	SM1
Phypoly-transcript-14051	2.2383e-22	0.772032	0.954	0.714	3.38431e-18	0	ELP5_DANRE	GO:0006355	1411	Phypoly-transcript-14051	0.24	SM1
Phypoly-transcript-03922	1.59208e-22	0.771634	0.919	0.642	2.40722e-18	0	GEFQ_DICDI	GO:0005085|GO:0005622|GO:0007264|GO:0005085|GO:0005622|GO:0051056|GO:0035556|GO:0005085|GO:0005622|GO:0051056|GO:0035556|GO:0005085|GO:0005622|GO:0007264	Ras guanine-nucleotide exchange factors catalytic domain profile.|RasGEF N-terminal motif|DEP domain profile.|Ras guanine-nucleotide exchange factors N-terminal domain profile.|Domain found in Dishevelled, Egl-10, and Pleckstrin (DEP)|RasGEF domain	Phypoly-transcript-03922	0.277	SM1
Phypoly-transcript-17611	5.78021e-27	0.77162	0.883	0.465	8.73968e-23	0	noGene	GO:0000151|GO:0004842|GO:0016567	4651	Phypoly-transcript-17611	0.418	SM1
Phypoly-transcript-12662	2.19366e-29	0.771421	0.975	0.795	3.31682e-25	0	noGene	GO:0006629	2894	Phypoly-transcript-12662	0.18	SM1
Phypoly-transcript-13125	1.866e-16	0.771069	0.868	0.645	2.8214e-12	0	YDZ4_SCHPO	GO:0005515|GO:0007154|GO:0035091	3519	Phypoly-transcript-13125	0.223	SM1
Phypoly-transcript-06967	3.87291e-23	0.770479	0.959	0.798	5.85584e-19	0	DDX19_DICDI	GO:0003676|GO:0005524|GO:0008026|GO:0003676|GO:0004386|GO:0005524|GO:0003676|GO:0004386|GO:0005524	DEAD/DEAH box helicase|Superfamilies 1 and 2 helicase C-terminal domain profile.|Helicase conserved C-terminal domain	Phypoly-transcript-06967	0.161	SM1
Phypoly-transcript-11019	4.95064e-25	0.770148	0.964	0.775	7.48537e-21	0	PIN1_BOVIN	GO:0016853|GO:0016853|GO:0005515|GO:0005515	PpiC-type peptidyl-prolyl cis-trans isomerase family profile.|PPIC-type PPIASE domain|Forkhead-associated (FHA) domain profile.|FHA domain	Phypoly-transcript-11019	0.189	SM1
Phypoly-transcript-05250	7.07573e-31	0.769731	0.98	0.766	1.06985e-26	0	WDR37_XENLA	GO:0005515|GO:0005515|GO:0005515	Trp-Asp (WD) repeats circular profile.|Trp-Asp (WD) repeats profile.|WD domain, G-beta repeat	Phypoly-transcript-05250	0.214	SM1
Phypoly-transcript-06329	5.73828e-27	0.769289	0.964	0.757	8.67628e-23	0	SYFA_ARATH	GO:0004812|GO:0006418|GO:0000049|GO:0004812|GO:0005524|GO:0005737|GO:0043039	Aminoacyl-transfer RNA synthetases class-II family profile.|tRNA synthetases class II core domain (F)	Phypoly-transcript-06329	0.207	SM1
Phypoly-transcript-13222	5.33583e-18	0.768822	0.66	0.289	8.06778e-14	0	CMBL_XENTR	GO:0016787	1071	Phypoly-transcript-13222	0.371	SM1
Phypoly-transcript-16986	1.95311e-20	0.768806	0.888	0.595	2.95311e-16	0	YWBO_BACSU	GO:0015035	1322	Phypoly-transcript-16986	0.293	SM1
Phypoly-transcript-14429	1.51507e-30	0.768656	0.99	0.942	2.29078e-26	0	noGene	GO:0000723|GO:0003678|GO:0006281	3092	Phypoly-transcript-14429	0.048	SM1
Phypoly-transcript-03469	1.46109e-22	0.768578	0.939	0.728	2.20917e-18	0	UVR8_ARATH	GO:0005515|GO:0005515	BTB domain profile.|BTB/POZ domain	Phypoly-transcript-03469	0.211	SM1
Phypoly-transcript-00461	1.18047e-26	0.768548	0.98	0.861	1.78486e-22	0	GEFD_DICDI	GO:0007165|GO:0005085|GO:0005622|GO:0007264|GO:0007165|GO:0005085|GO:0005622|GO:0051056|GO:0005085|GO:0005622|GO:0051056|GO:0005085|GO:0005622|GO:0007264	Rho GTPase-activating proteins domain profile.|RasGEF domain|RhoGAP domain|RasGEF N-terminal motif|Ras guanine-nucleotide exchange factors N-terminal domain profile.|Ras guanine-nucleotide exchange factors catalytic domain profile.	Phypoly-transcript-00461	0.119	SM1
Phypoly-transcript-03082	7.44751e-16	0.768369	0.822	0.592	1.12606e-11	0	DNLI_HAEIN	GO:0003910|GO:0005524|GO:0006281|GO:0006310	383	Phypoly-transcript-03082	0.23	SM1
Phypoly-transcript-25177	2.68973e-29	0.768237	0.97	0.757	4.06688e-25	0	NNTM_HUMAN	GO:0008750|GO:0016021|GO:0050661|GO:0055114	2665	Phypoly-transcript-25177	0.213	SM1
Phypoly-transcript-07386	1.62267e-28	0.768174	0.985	0.853	2.45348e-24	0	TYW23_ORYSJ	GO:0005515|GO:0005515|GO:0005515	F-box domain|Kelch motif|F-box domain profile.	Phypoly-transcript-07386	0.132	SM1
Phypoly-transcript-04242	1.42144e-29	0.768002	0.985	0.806	2.14921e-25	0	KC1_DICDI	GO:0004672|GO:0005524|GO:0006468|GO:0005524|GO:0004672|GO:0005524|GO:0006468|GO:0004674|GO:0006468	Protein kinase domain profile.|Protein kinases ATP-binding region signature.|Protein kinase domain|Serine/Threonine protein kinases active-site signature.	Phypoly-transcript-04242	0.179	SM1
Phypoly-transcript-04338	7.19173e-29	0.767666	0.99	0.867	1.08739e-24	0	WD66_PHYPO	GO:0005515|GO:0005515|GO:0005515	WD domain, G-beta repeat|Trp-Asp (WD) repeats profile.|Trp-Asp (WD) repeats circular profile.	Phypoly-transcript-04338	0.123	SM1
Phypoly-transcript-04439	4.94586e-26	0.76752	0.863	0.523	7.47815e-22	0	DNLI_HAEIN	GO:0003910|GO:0005524|GO:0006281|GO:0006310|GO:0003910|GO:0005524|GO:0006281|GO:0006310	ATP-dependent DNA ligase family profile.|ATP dependent DNA ligase domain	Phypoly-transcript-04439	0.34	SM1
Phypoly-transcript-02067	1.34832e-30	0.767492	0.98	0.864	2.03866e-26	0	FNTA_DICDI	GO:0008318|GO:0018342|GO:0008318|GO:0018342	Protein prenyltransferases alpha subunit repeat profile.|Protein prenyltransferase alpha subunit repeat	Phypoly-transcript-02067	0.116	SM1
Phypoly-transcript-06483	6.70265e-24	0.767462	0.934	0.725	1.01344e-19	0	BBR_ARATH	GO:0005515|GO:0008270|GO:0005515|GO:0008270	Zinc finger RING-type profile.|Ring finger domain	Phypoly-transcript-06483	0.209	SM1
Phypoly-transcript-03834	1.34247e-25	0.76659	0.975	0.858	2.02982e-21	0	ANK2_HUMAN	GO:0005515|GO:0005515|GO:0005515	Ankyrin repeat profile.|Ankyrin repeat|F-box domain profile.	Phypoly-transcript-03834	0.117	SM1
Phypoly-transcript-10704	9.29674e-26	0.766536	0.964	0.763	1.40567e-21	0	GERAS_NOSP7	GO:0000287|GO:0010333|GO:0016829	4359	Phypoly-transcript-10704	0.201	SM1
Phypoly-transcript-10439	9.26976e-20	0.766477	0.929	0.775	1.40159e-15	0	HFA2E_ORYSJ	GO:0003700|GO:0005634|GO:0006355|GO:0043565	2120	Phypoly-transcript-10439	0.154	SM1
Phypoly-transcript-04619	7.68988e-21	0.76576	0.812	0.425	1.16271e-16	0	HEXA_PORGI	GO:0004553|GO:0005975	1840	Phypoly-transcript-04619	0.387	SM1
Phypoly-transcript-07692	1.03448e-24	0.76522	0.97	0.879	1.56413e-20	0	RABG2_DICDI	GO:0005525|GO:0007264	3588	Phypoly-transcript-07692	0.091	SM1
Phypoly-transcript-10820	1.7005e-28	0.765169	0.98	0.763	2.57116e-24	0	ODPA_DICDI	GO:0008152|GO:0016624	1036	Phypoly-transcript-10820	0.217	SM1
Phypoly-transcript-06932	2.15155e-29	0.765158	0.975	0.795	3.25314e-25	0	G6PD_DICDI	GO:0004345|GO:0006006|GO:0050661|GO:0055114|GO:0004345|GO:0006006|GO:0055114|GO:0004345|GO:0006006|GO:0050661|GO:0055114	Glucose-6-phosphate dehydrogenase, C-terminal domain|Glucose-6-phosphate dehydrogenase active site.|Glucose-6-phosphate dehydrogenase, NAD binding domain	Phypoly-transcript-06932	0.18	SM1
Phypoly-transcript-06518	5.24753e-22	0.764434	0.949	0.751	7.93427e-18	0	CPSF5_XENLA	GO:0016787|GO:0003729|GO:0005849|GO:0006378	Nudix hydrolase domain profile.|Nucleotide hydrolase	Phypoly-transcript-06518	0.198	SM1
Phypoly-transcript-12247	3.36008e-23	0.764364	0.954	0.699	5.08045e-19	0	ZNTB_DICDI	GO:0016020|GO:0030001|GO:0046873|GO:0055085	5016	Phypoly-transcript-12247	0.255	SM1
Phypoly-transcript-03116	1.63339e-26	0.762839	0.98	0.855	2.46968e-22	0	NGAP_DICDI	GO:0005096|GO:0005622|GO:0051056|GO:0005515|GO:0005515|GO:0005096|GO:0005622|GO:0051056	Ras GTPase-activating proteins profile.|C2 domain profile.|C2 domain|GTPase-activator protein for Ras-like GTPase	Phypoly-transcript-03116	0.125	SM1
Phypoly-transcript-10906	1.68266e-22	0.762822	0.929	0.662	2.54419e-18	0	Y7151_DICDI	GO:0003824|GO:0016020	2880	Phypoly-transcript-10906	0.267	SM1
Phypoly-transcript-11545	1.71429e-27	0.762806	0.98	0.824	2.59201e-23	0	CM2A2_DICDI	GO:0015031	4171	Phypoly-transcript-11545	0.156	SM1
Phypoly-transcript-08028	4.6038e-24	0.762661	0.959	0.711	6.96095e-20	0	ANKK1_HUMAN	GO:0000156|GO:0000160|GO:0006355|GO:0005515|GO:0000156|GO:0000160|GO:0006355	Response regulatory domain profile.|Ankyrin repeat profile.|Response regulator receiver domain	Phypoly-transcript-08028	0.248	SM1
Phypoly-transcript-19580	2.53844e-23	0.762641	0.964	0.743	3.83813e-19	0	RHEB_DICDI	GO:0005525|GO:0007264|GO:0003924|GO:0005525|GO:0006184|GO:0007165|GO:0016020	Ras family|small GTPase Ras family profile.	Phypoly-transcript-19580	0.221	SM1
Phypoly-transcript-28806	1.65171e-21	0.762574	0.959	0.737	2.49739e-17	0	LIMD_DICDI	GO:0008270|GO:0008270|GO:0008270	LIM domain profile.|LIM zinc-binding domain signature.|LIM domain	Phypoly-transcript-28806	0.222	SM1
Phypoly-transcript-18691	4.62604e-15	0.762557	0.797	0.486	6.99457e-11	0	RPP29_RAT	GO:0000172|GO:0003723|GO:0004540|GO:0006364|GO:0006379|GO:0008033|GO:0030677	1304	Phypoly-transcript-18691	0.311	SM1
Phypoly-transcript-15863	2.36927e-29	0.762451	0.97	0.766	3.58233e-25	0	RB32A_DICDI	GO:0005525|GO:0007264	3588	Phypoly-transcript-15863	0.204	SM1
Phypoly-transcript-12835	8.13841e-23	0.762192	0.97	0.777	1.23053e-18	0	LGRE_BREPA	GO:0009058|GO:0016788	4400	Phypoly-transcript-12835	0.193	SM1
Phypoly-transcript-18067	4.07362e-23	0.761752	0.914	0.65	6.15932e-19	0	Y1500_ARATH	GO:0016311|GO:0016791|GO:0004725|GO:0016311|GO:0016791	Tyrosine specific protein phosphatases family profile.|Tyrosine specific protein phosphatases active site.	Phypoly-transcript-18067	0.264	SM1
Phypoly-transcript-14405	4.04937e-23	0.761268	0.959	0.786	6.12265e-19	0	EFHD2_DROME	GO:0005509|GO:0005509	EF-hand domain pair|EF-hand calcium-binding domain profile.	Phypoly-transcript-14405	0.173	SM1
Phypoly-transcript-02913	6.67798e-21	0.76058	0.914	0.685	1.00971e-16	0	DNLI_HAEIN	GO:0003909|GO:0051103|GO:0003910|GO:0005524|GO:0006281|GO:0006310|GO:0003910|GO:0005524|GO:0006281|GO:0006310	ATP-dependent DNA ligase signature 2.|ATP-dependent DNA ligase family profile.|ATP dependent DNA ligase domain	Phypoly-transcript-02913	0.229	SM1
Phypoly-transcript-23765	4.28791e-32	0.760424	0.98	0.743	6.48332e-28	0	Y2416_ARATH	GO:0003676	199	Phypoly-transcript-23765	0.237	SM1
Phypoly-transcript-18916	7.29772e-22	0.760306	0.812	0.419	1.10342e-17	0	UBC2_YARLI	GO:0016881|GO:0016881	Ubiquitin-conjugating enzymes family profile.|Ubiquitin-conjugating enzyme	Phypoly-transcript-18916	0.393	SM1
Phypoly-transcript-10484	1.35755e-20	0.760235	0.756	0.384	2.05262e-16	0	TAZ_MACMU	GO:0008152|GO:0016746	145	Phypoly-transcript-10484	0.372	SM1
Phypoly-transcript-08823	3.21112e-25	0.760209	0.944	0.708	4.85521e-21	0	ADHI_RHOS4	GO:0008270|GO:0016491|GO:0055114|GO:0016491|GO:0055114|GO:0008270|GO:0016491|GO:0055114	Zinc-binding dehydrogenase|Alcohol dehydrogenase GroES-like domain|Zinc-containing alcohol dehydrogenases signature.	Phypoly-transcript-08823	0.236	SM1
Phypoly-transcript-13893	8.43772e-31	0.760045	0.98	0.835	1.27578e-26	0	RGS17_HUMAN	GO:0038032|GO:0038032	RGS domain profile.|Regulator of G protein signaling domain	Phypoly-transcript-13893	0.145	SM1
Phypoly-transcript-08808	8.68217e-21	0.759874	0.98	0.838	1.31274e-16	0	MIRO1_CHICK	GO:0005509	1376	Phypoly-transcript-08808	0.142	SM1
Phypoly-transcript-04397	8.23487e-29	0.759803	0.98	0.882	1.24511e-24	0	ABCD3_HUMAN	GO:0006810|GO:0016020|GO:0005524|GO:0006810|GO:0016021|GO:0042626|GO:0055085|GO:0005524|GO:0016887|GO:0005524|GO:0016887|GO:0005524|GO:0016887	ABC transporter transmembrane region 2|ABC transporter integral membrane type-1 fused domain profile.|ATP-binding cassette, ABC transporter-type domain profile.|ABC transporters family signature.|ABC transporter	Phypoly-transcript-04397	0.098	SM1
Phypoly-transcript-12824	8.04315e-31	0.759478	0.797	0.321	1.21612e-26	0	KLH23_MOUSE	GO:0005515|GO:0005515	BTB domain profile.|BTB/POZ domain	Phypoly-transcript-12824	0.476	SM1
Phypoly-transcript-12126	1.32945e-26	0.759167	0.985	0.844	2.01013e-22	0	CSN6_DICDI	GO:0005515	2246	Phypoly-transcript-12126	0.141	SM1
Phypoly-transcript-28936	3.18838e-27	0.758749	0.975	0.801	4.82082e-23	0	noGene	GO:0003676|GO:0003676	RNA recognition motif. (a.k.a. RRM, RBD, or RNP domain)|Eukaryotic RNA Recognition Motif (RRM) profile.	Phypoly-transcript-28936	0.174	SM1
Phypoly-transcript-12780	1.8726e-28	0.758511	0.97	0.737	2.83138e-24	0	noGene	GO:0005509|GO:0005509	EF-hand calcium-binding domain profile.|EF-hand domain pair	Phypoly-transcript-12780	0.233	SM1
Phypoly-transcript-09264	5.70162e-22	0.758301	0.929	0.702	8.62085e-18	0	ENT8_ARATH	GO:0005337|GO:0006810|GO:0016021	2783	Phypoly-transcript-09264	0.227	SM1
Phypoly-transcript-00688	5.74531e-28	0.75829	0.985	0.864	8.68692e-24	0	DYNA_NEUCR	GO:0008289|GO:0008289	START domain profile.|START domain	Phypoly-transcript-00688	0.121	SM1
Phypoly-transcript-01541	2.01536e-25	0.758092	0.985	0.887	3.04722e-21	0	ARF1_SOLTU	GO:0003910|GO:0005524|GO:0006281|GO:0006310	383	Phypoly-transcript-01541	0.098	SM1
Phypoly-transcript-00655	8.68534e-26	0.757826	0.959	0.824	1.31322e-21	0	MANA_DICDI	GO:0006013|GO:0015923|GO:0005215|GO:0005737|GO:0006810|GO:0016021|GO:0004553|GO:0008270|GO:0004559|GO:0005975	Glycosyl hydrolases family 38 C-terminal domain|Cation-independent mannose-6-phosphate receptor repeat|Alpha mannosidase, middle domain|Glycosyl hydrolases family 38 N-terminal domain	Phypoly-transcript-00655	0.135	SM1
Phypoly-transcript-15847	3.62787e-14	0.757792	0.716	0.422	5.48534e-10	0	MARE1_HUMAN	GO:0005515|GO:0005515|GO:0008017	Calponin homology domain profile.|Calponin homology (CH) domain|EB1-like C-terminal motif	Phypoly-transcript-15847	0.294	SM1
Phypoly-transcript-02940	1.16438e-26	0.757786	0.985	0.829	1.76055e-22	0	KIME_DICDI	GO:0005524|GO:0005524	GHMP kinases N terminal domain|GHMP kinases putative ATP-binding domain.	Phypoly-transcript-02940	0.156	SM1
Phypoly-transcript-03475	6.02533e-23	0.75772	0.934	0.777	9.1103e-19	0	NGLY1_DANRE	GO:0003684|GO:0005634|GO:0006289|GO:0005515|GO:0030246|GO:0005515	Rad4 transglutaminase-like domain|Ubiquitin family|Legume lectin domain|Ubiquitin domain profile.	Phypoly-transcript-03475	0.157	SM1
Phypoly-transcript-00711	3.1227e-29	0.75757	0.99	0.916	4.72153e-25	0	SYG_RAT	GO:0004812|GO:0006418|GO:0000166|GO:0004812|GO:0005524|GO:0006418	Aminoacyl-transfer RNA synthetases class-II family profile.|tRNA synthetase class II core domain (G, H, P, S and T)	Phypoly-transcript-00711	0.074	SM1
Phypoly-transcript-17167	3.42985e-21	0.756948	0.939	0.688	5.18594e-17	0	CDGT1_BACCI	GO:2001070|GO:2001070	CBM20 (carbohydrate binding type-20) domain profile.|Starch binding domain	Phypoly-transcript-17167	0.251	SM1
Phypoly-transcript-21352	2.09727e-21	0.756489	0.944	0.668	3.17108e-17	0	FKBP_CRYNH	GO:0006457|GO:0006457	FKBP-type peptidyl-prolyl cis-trans isomerase|FKBP-type peptidyl-prolyl cis-trans isomerase domain profile.	Phypoly-transcript-21352	0.276	SM1
Phypoly-transcript-03635	1.4899e-25	0.756319	0.975	0.91	2.25273e-21	0	DHKM_DICDI	GO:0000156|GO:0000160|GO:0006355|GO:0000156|GO:0000160|GO:0006355	Response regulatory domain profile.|Response regulator receiver domain	Phypoly-transcript-03635	0.065	SM1
Phypoly-transcript-10683	8.39106e-27	0.756148	0.975	0.798	1.26873e-22	0	BUP1_DICDI	GO:0006807|GO:0016810|GO:0006807|GO:0016810	Carbon-nitrogen hydrolase domain profile.|Carbon-nitrogen hydrolase	Phypoly-transcript-10683	0.177	SM1
Phypoly-transcript-10636	5.03409e-22	0.755971	0.944	0.847	7.61154e-18	0	ALKB_SALTY	GO:0016491|GO:0016706|GO:0055114	1580	Phypoly-transcript-10636	0.097	SM1
Phypoly-transcript-07480	2.16565e-18	0.755745	0.812	0.538	3.27446e-14	0	ARFRP_RAT	GO:0005525|GO:0005622|GO:0007264|GO:0005525	small GTPase Arf family profile.|ADP-ribosylation factor family	Phypoly-transcript-07480	0.274	SM1
Phypoly-transcript-04868	2.17186e-26	0.755383	0.98	0.818	3.28385e-22	0	BCK1_YEAST	GO:0004672|GO:0005524|GO:0006468|GO:0004672|GO:0005524|GO:0006468	Protein kinase domain profile.|Protein kinase domain	Phypoly-transcript-04868	0.162	SM1
Phypoly-transcript-10959	5.73744e-33	0.754869	0.975	0.861	8.67502e-29	0	SR45_ARATH	GO:0003676|GO:0003676	Eukaryotic RNA Recognition Motif (RRM) profile.|RNA recognition motif. (a.k.a. RRM, RBD, or RNP domain)	Phypoly-transcript-10959	0.114	SM1
Phypoly-transcript-16284	2.62738e-25	0.754745	0.97	0.783	3.97259e-21	0	PSB4_DICDI	GO:0004298|GO:0004298|GO:0005839|GO:0051603	Proteasome beta-type subunit profile.|Proteasome subunit	Phypoly-transcript-16284	0.187	SM1
Phypoly-transcript-01608	8.2431e-27	0.754692	0.985	0.899	1.24636e-22	0	AP3B2_HUMAN	GO:0006886|GO:0016192|GO:0030117	150	Phypoly-transcript-01608	0.086	SM1
Phypoly-transcript-07547	2.34061e-27	0.754406	0.98	0.783	3.539e-23	0	AGAL_CYATE	GO:0004553|GO:0005975|GO:0004553|GO:0005975	Alpha-galactosidase signature.|Melibiase	Phypoly-transcript-07547	0.197	SM1
Phypoly-transcript-13212	3.15176e-26	0.754276	0.97	0.705	4.76546e-22	0	TBCD1_HUMAN	GO:0005097|GO:0032313|GO:0005097|GO:0032313	Rab-GTPase-TBC domain|TBC/rab GAP domain profile.	Phypoly-transcript-13212	0.265	SM1
Phypoly-transcript-04082	6.73527e-25	0.753614	0.97	0.789	1.01837e-20	0	FTHS_ARATH	GO:0004329|GO:0005524|GO:0009396|GO:0004329|GO:0005524|GO:0009396|GO:0004329|GO:0005524|GO:0009396	Formate--tetrahydrofolate ligase signature 1.|Formate--tetrahydrofolate ligase signature 2.|Formate--tetrahydrofolate ligase	Phypoly-transcript-04082	0.181	SM1
Phypoly-transcript-18829	2.03492e-20	0.753311	0.944	0.702	3.0768e-16	0	CCHL_DICDI	GO:0004408|GO:0005739|GO:0004408|GO:0005739|GO:0004408|GO:0005739	Cytochrome c and c1 heme lyases signature 1.|Cytochrome c and c1 heme lyases signature 2.|Cytochrome c/c1 heme lyase	Phypoly-transcript-18829	0.242	SM1
Phypoly-transcript-07414	1.08126e-24	0.753163	0.964	0.734	1.63486e-20	0	UTP15_DANRE	GO:0005515|GO:0005730|GO:0006364|GO:0005515|GO:0005515	Trp-Asp (WD) repeats profile.|UTP15 C terminal|WD domain, G-beta repeat|Trp-Asp (WD) repeats circular profile.	Phypoly-transcript-07414	0.23	SM1
Phypoly-transcript-06261	8.7902e-21	0.753003	0.904	0.676	1.32908e-16	0	CBP1_BACSU	GO:0004181|GO:0006508	643	Phypoly-transcript-06261	0.228	SM1
Phypoly-transcript-06408	1.00397e-29	0.752985	0.98	0.902	1.518e-25	0	MFEA_DICDI	GO:0016491|GO:0032934|GO:0008152|GO:0016491	Short-chain dehydrogenases/reductases family signature.|SCP-2 sterol transfer family|short chain dehydrogenase	Phypoly-transcript-06408	0.078	SM1
Phypoly-transcript-17750	1.01957e-18	0.752857	0.924	0.662	1.54159e-14	0	RPE1_ORYSJ	GO:0005975|GO:0016857|GO:0005975|GO:0016857|GO:0005975|GO:0016857	Ribulose-phosphate 3 epimerase family|Ribulose-phosphate 3-epimerase family signature 2.|Ribulose-phosphate 3-epimerase family signature 1.	Phypoly-transcript-17750	0.262	SM1
Phypoly-transcript-21052	8.74801e-11	0.752439	0.411	0.165	1.3227e-06	0	RAB1A_RAT	GO:0005525|GO:0007264	3588	Phypoly-transcript-21052	0.246	SM1
Phypoly-transcript-17352	4.1372e-14	0.752374	0.904	0.737	6.25545e-10	0	U3IP2_MOUSE	GO:0005515|GO:0005515|GO:0005515	Trp-Asp (WD) repeats profile.|WD domain, G-beta repeat|Trp-Asp (WD) repeats circular profile.	Phypoly-transcript-17352	0.167	SM1
Phypoly-transcript-06120	1.54557e-20	0.752197	0.898	0.621	2.3369e-16	0	UT2_HUMAN	GO:0015204|GO:0016021|GO:0071918	4777	Phypoly-transcript-06120	0.277	SM1
Phypoly-transcript-05225	1.72094e-22	0.752133	0.934	0.737	2.60206e-18	0	GEPH_DICDI	GO:0006777|GO:0032324|GO:0006777|GO:0032324	Probable molybdopterin binding domain|MoeA C-terminal region (domain IV)|Molybdenum cofactor biosynthesis proteins signature 2.|MoeA N-terminal region (domain I and II)	Phypoly-transcript-05225	0.197	SM1
Phypoly-transcript-04307	3.79025e-26	0.751642	0.964	0.806	5.73085e-22	0	STT3_DICDI	GO:0004576|GO:0006486|GO:0016020	2815	Phypoly-transcript-04307	0.158	SM1
Phypoly-transcript-04385	8.63095e-23	0.751525	0.904	0.653	1.305e-18	0	LPCT1_ARATH	GO:0016787	597	Phypoly-transcript-04385	0.251	SM1
Phypoly-transcript-07389	2.32111e-23	0.751496	0.939	0.676	3.50952e-19	0	FR1OP_HUMAN	GO:0005815|GO:0034453	1647	Phypoly-transcript-07389	0.263	SM1
Phypoly-transcript-19703	2.87335e-15	0.751364	0.67	0.341	4.34451e-11	0	ANR39_HUMAN	GO:0005515	295	Phypoly-transcript-19703	0.329	SM1
Phypoly-transcript-08463	5.9292e-19	0.751135	0.934	0.734	8.96495e-15	0	TXLNA_HUMAN	GO:0019905	2612	Phypoly-transcript-08463	0.2	SM1
Phypoly-transcript-18619	9.52086e-22	0.749787	0.909	0.645	1.43955e-17	0	noGene	GO:0003676|GO:0003676	SAP motif profile.|SAP domain	Phypoly-transcript-18619	0.264	SM1
Phypoly-transcript-04715	5.49084e-24	0.749491	0.98	0.876	8.30214e-20	0	NUCMR_DICDI	GO:0003676	1497	Phypoly-transcript-04715	0.104	SM1
Phypoly-transcript-06377	2.61858e-29	0.749347	0.98	0.827	3.95929e-25	0	GABT_DICDI	GO:0008483|GO:0030170|GO:0008483|GO:0030170	Aminotransferases class-III pyridoxal-phosphate attachment site.|Aminotransferase class-III	Phypoly-transcript-06377	0.153	SM1
Phypoly-transcript-01684	7.86482e-28	0.749241	0.812	0.376	1.18916e-23	0	DHX37_HUMAN	GO:0004386|GO:0003676|GO:0005524|GO:0008026|GO:0003676|GO:0005524|GO:0008026|GO:0003676|GO:0004386|GO:0005524|GO:0003676|GO:0004386|GO:0005524	Helicase associated domain (HA2)|DEAH-box subfamily ATP-dependent helicases signature.|DEAD/DEAH box helicase|Helicase conserved C-terminal domain|Superfamilies 1 and 2 helicase C-terminal domain profile.	Phypoly-transcript-01684	0.436	SM1
Phypoly-transcript-23971	1.01587e-23	0.749229	0.893	0.656	1.536e-19	0	GEFQ_DICDI	GO:0005085|GO:0005622|GO:0007264|GO:0005085|GO:0005622|GO:0007264	Ras guanine-nucleotide exchange factors catalytic domain profile.|RasGEF domain	Phypoly-transcript-23971	0.237	SM1
Phypoly-transcript-03211	1.18368e-22	0.749166	0.97	0.827	1.78972e-18	0	DDI2_XENTR	GO:0004190|GO:0006508|GO:0005515|GO:0005515	Aspartyl protease|Ubiquitin family|Ubiquitin domain profile.	Phypoly-transcript-03211	0.143	SM1
Phypoly-transcript-00372	9.71073e-28	0.748794	0.964	0.798	1.46826e-23	0	NWD1_MOUSE	GO:0005515|GO:0005515|GO:0005515	Trp-Asp (WD) repeats profile.|Trp-Asp (WD) repeats circular profile.|WD domain, G-beta repeat	Phypoly-transcript-00372	0.166	SM1
Phypoly-transcript-20022	3.07795e-27	0.748274	0.975	0.723	4.65386e-23	0	TPX_PSEAE	GO:0016491|GO:0016684|GO:0055114	Redoxin|Tpx family signature.	Phypoly-transcript-20022	0.252	SM1
Phypoly-transcript-05762	3.35923e-27	0.748201	0.985	0.945	5.07916e-23	0	ACH1_NEUCR	GO:0005515|GO:0005515	Ankyrin repeat profile.|Ankyrin repeat	Phypoly-transcript-05762	0.04	SM1
Phypoly-transcript-02121	1.24655e-21	0.747134	0.944	0.76	1.88478e-17	0	DNLI_HAEIN	GO:0003910|GO:0005524|GO:0006281|GO:0006310	383	Phypoly-transcript-02121	0.184	SM1
Phypoly-transcript-04566	6.12533e-19	0.74673	0.858	0.636	9.2615e-15	0	DIMB_DICDI	GO:0003700|GO:0006355|GO:0043565|GO:0003700|GO:0006355|GO:0043565	bZIP transcription factor|Basic-leucine zipper (bZIP) domain profile.	Phypoly-transcript-04566	0.222	SM1
Phypoly-transcript-14443	1.66207e-34	0.746687	0.782	0.263	2.51304e-30	0	ABCF4_DICDI	GO:0005524|GO:0016887|GO:0005524|GO:0016887|GO:0005524|GO:0016887	ABC transporters family signature.|ATP-binding cassette, ABC transporter-type domain profile.|ABC transporter	Phypoly-transcript-14443	0.519	SM1
Phypoly-transcript-16901	7.11087e-34	0.746623	0.98	0.763	1.07516e-29	0	GSTP_DIRIM	GO:0005515|GO:0005515	Glutathione S-transferase, N-terminal domain|Soluble glutathione S-transferase N-terminal domain profile.	Phypoly-transcript-16901	0.217	SM1
Phypoly-transcript-09924	3.26452e-25	0.74657	0.975	0.777	4.93595e-21	0	SNDH_GLULI	GO:0005975|GO:0016901|GO:0048038	1787	Phypoly-transcript-09924	0.198	SM1
Phypoly-transcript-06996	3.27296e-23	0.746507	0.964	0.795	4.94871e-19	0	PX24C_DICDI	GO:0008146	4287	Phypoly-transcript-06996	0.169	SM1
Phypoly-transcript-14270	8.53011e-14	0.74649	0.751	0.465	1.28975e-09	0	SDHL_DICDI	GO:0006520|GO:0030170	4082	Phypoly-transcript-14270	0.286	SM1
Phypoly-transcript-04428	9.29773e-22	0.746226	0.858	0.486	1.40582e-17	0	SELD_ALKOO	GO:0008152|GO:0003824	Aminotransferase class-V|AIR synthase related protein, N-terminal domain	Phypoly-transcript-04428	0.372	SM1
Phypoly-transcript-06907	3.00377e-25	0.746212	0.954	0.757	4.54171e-21	0	UCKD_DICDI	GO:0005524|GO:0008152|GO:0016301	3073	Phypoly-transcript-06907	0.197	SM1
Phypoly-transcript-06638	1.98281e-23	0.746207	0.97	0.838	2.99801e-19	0	ARL16_HUMAN	GO:0005525|GO:0005525|GO:0005622|GO:0007264	ADP-ribosylation factor family|small GTPase Arf family profile.	Phypoly-transcript-06638	0.132	SM1
Phypoly-transcript-04940	8.85564e-28	0.745399	0.98	0.775	1.33897e-23	0	PAKC_DICDI	GO:0004672|GO:0005524|GO:0006468|GO:0004672|GO:0005524|GO:0006468	Protein kinase domain profile.|Protein kinase domain	Phypoly-transcript-04940	0.205	SM1
Phypoly-transcript-07233	1.04511e-23	0.745214	0.929	0.694	1.5802e-19	0	CHST1_MOUSE	GO:0008146	4287	Phypoly-transcript-07233	0.235	SM1
Phypoly-transcript-09185	2.07233e-19	0.745047	0.883	0.613	3.13336e-15	0	COX10_ARATH	GO:0004659|GO:0016021	4662	Phypoly-transcript-09185	0.27	SM1
Phypoly-transcript-06466	1.43438e-30	0.74486	0.97	0.824	2.16878e-26	0	DHE3_DICDI	GO:0006520|GO:0016491|GO:0055114|GO:0006520|GO:0016491|GO:0055114|GO:0006520|GO:0016491|GO:0055114	Glutamate/Leucine/Phenylalanine/Valine dehydrogenase|Glu/Leu/Phe/Val dehydrogenase, dimerisation domain|Glu / Leu / Phe / Val dehydrogenases active site.	Phypoly-transcript-06466	0.146	SM1
Phypoly-transcript-02507	9.80397e-28	0.744467	0.98	0.815	1.48236e-23	0	ENG2_SCHPO	GO:0016998|GO:0052861|GO:0052862	1856	Phypoly-transcript-02507	0.165	SM1
Phypoly-transcript-19752	3.08703e-22	0.744265	0.97	0.708	4.66759e-18	0	PHS_RHOPB	GO:0006729|GO:0008124	3460	Phypoly-transcript-19752	0.262	SM1
Phypoly-transcript-06049	1.1507e-24	0.744035	0.975	0.809	1.73986e-20	0	VPS45_DICDI	GO:0006904|GO:0016192	4033	Phypoly-transcript-06049	0.166	SM1
Phypoly-transcript-11422	6.78918e-26	0.743879	0.97	0.838	1.02652e-21	0	CRLA_DICDI	GO:0016021	1707	Phypoly-transcript-11422	0.132	SM1
Phypoly-transcript-03781	1.61003e-23	0.743794	0.99	0.882	2.43437e-19	0	PHYSA_PHYPO	GO:0008236	3225	Phypoly-transcript-03781	0.108	SM1
Phypoly-transcript-15118	2.70605e-23	0.743752	0.98	0.821	4.09154e-19	0	CCT1_ARATH	GO:0003824|GO:0009058	947	Phypoly-transcript-15118	0.159	SM1
Phypoly-transcript-06074	2.58986e-26	0.743647	0.97	0.806	3.91587e-22	0	RN216_HUMAN	GO:0008270	2157	Phypoly-transcript-06074	0.164	SM1
Phypoly-transcript-10358	2.3692e-12	0.743643	0.706	0.442	3.58223e-08	0	ILKAP_BOVIN	GO:0003824|GO:0004722|GO:0006470	Protein phosphatase 2C|Protein phosphatase 2C signature.	Phypoly-transcript-10358	0.264	SM1
Phypoly-transcript-03176	4.74671e-26	0.743499	0.99	0.879	7.17702e-22	0	SHKD_DICDI	GO:0005524|GO:0005515|GO:0004674|GO:0006468|GO:0004672|GO:0005524|GO:0006468|GO:0004672|GO:0006468|GO:0005515	Protein kinases ATP-binding region signature.|SH2 domain|Serine/Threonine protein kinases active-site signature.|Protein kinase domain profile.|Protein tyrosine kinase|Src homology 2 (SH2) domain profile.	Phypoly-transcript-03176	0.111	SM1
Phypoly-transcript-04263	2.80127e-21	0.743454	0.975	0.815	4.23553e-17	0	NHLC2_CHICK	GO:0005515	2703	Phypoly-transcript-04263	0.16	SM1
Phypoly-transcript-02351	4.84189e-25	0.743373	0.985	0.899	7.32094e-21	0	DNLI_HAEIN	GO:0003910|GO:0005524|GO:0006281|GO:0006310	383	Phypoly-transcript-02351	0.086	SM1
Phypoly-transcript-17889	9.65646e-30	0.743314	0.97	0.795	1.46006e-25	0	TMEDE_DROGR	GO:0006810|GO:0016021|GO:0006810|GO:0016021	emp24/gp25L/p24 family/GOLD|GOLD domain profile.	Phypoly-transcript-17889	0.175	SM1
Phypoly-transcript-21088	2.18748e-20	0.742983	0.964	0.728	3.30748e-16	0	AP1S2_DICDI	GO:0006886|GO:0016192|GO:0030117	790	Phypoly-transcript-21088	0.236	SM1
Phypoly-transcript-06493	3.86674e-24	0.742753	0.954	0.766	5.84651e-20	0	noGene	GO:0046872|GO:0046872	Zinc finger C3H1-type profile.|Zinc finger C-x8-C-x5-C-x3-H type (and similar)	Phypoly-transcript-06493	0.188	SM1
Phypoly-transcript-10297	5.77111e-25	0.742681	0.975	0.835	8.72592e-21	0	IFI44_PANTR	GO:0051260	553	Phypoly-transcript-10297	0.14	SM1
Phypoly-transcript-01382	3.15527e-24	0.742662	0.98	0.916	4.77077e-20	0	SARM1_CAEEL	GO:0005515	4006	Phypoly-transcript-01382	0.064	SM1
Phypoly-transcript-03084	1.17159e-26	0.742652	0.98	0.899	1.77145e-22	0	IF44L_MOUSE	GO:0000166|GO:0003677|GO:0005524|GO:0007049|GO:0007059|GO:0016021|GO:0051301	1675	Phypoly-transcript-03084	0.081	SM1
Phypoly-transcript-16701	4.98299e-15	0.742634	0.817	0.552	7.53429e-11	0	PPIB_DICDI	GO:0003755|GO:0006457|GO:0003755|GO:0006457|GO:0003755|GO:0006457	Cyclophilin-type peptidyl-prolyl cis-trans isomerase domain profile.|Cyclophilin type peptidyl-prolyl cis-trans isomerase/CLD|Cyclophilin-type peptidyl-prolyl cis-trans isomerase signature.	Phypoly-transcript-16701	0.265	SM1
Phypoly-transcript-01579	8.09358e-23	0.742327	0.954	0.777	1.22375e-18	0	CLU_DROGR	GO:0005634|GO:0006355|GO:0005634|GO:0006355	YEATS domain profile.|YEATS family	Phypoly-transcript-01579	0.177	SM1
Phypoly-transcript-04807	5.36517e-18	0.742286	0.904	0.647	8.11213e-14	0	LRC34_HUMAN	GO:0005515	2332	Phypoly-transcript-04807	0.257	SM1
Phypoly-transcript-02753	1.60567e-18	0.741779	0.924	0.74	2.42777e-14	0	WDR75_DANRE	GO:0005515|GO:0005515|GO:0005515	WD domain, G-beta repeat|Trp-Asp (WD) repeats profile.|Trp-Asp (WD) repeats circular profile.	Phypoly-transcript-02753	0.184	SM1
Phypoly-transcript-02050	8.22026e-14	0.741476	0.746	0.428	1.2429e-09	0	DNLI_HAEIN	GO:0003910|GO:0005524|GO:0006281|GO:0006310	383	Phypoly-transcript-02050	0.318	SM1
Phypoly-transcript-02629	1.78903e-29	0.740438	0.98	0.858	2.70502e-25	0	CUL1_DICDI	GO:0006511|GO:0031461|GO:0031625|GO:0006511|GO:0031461|GO:0031625|GO:0006511|GO:0031461|GO:0031625|GO:0006511|GO:0031461|GO:0031625	Cullin family|Cullin family signature.|Cullin family profile.|Cullin protein neddylation domain	Phypoly-transcript-02629	0.122	SM1
Phypoly-transcript-14091	8.51791e-15	0.74043	0.853	0.61	1.28791e-10	0	CALM_CANAX	GO:0005509|GO:0005509	EF-hand calcium-binding domain profile.|EF-hand domain pair	Phypoly-transcript-14091	0.243	SM1
Phypoly-transcript-09643	2.71856e-23	0.740216	0.964	0.749	4.11046e-19	0	TM120_DICDI	GO:0016021	4444	Phypoly-transcript-09643	0.215	SM1
Phypoly-transcript-16187	5.01148e-11	0.740215	0.589	0.324	7.57736e-07	0	SURF1_DICDI	GO:0016020|GO:0016020	SURF1 family|SURF1 family profile.	Phypoly-transcript-16187	0.265	SM1
Phypoly-transcript-04747	1.5411e-25	0.740207	0.97	0.858	2.33014e-21	0	YR636_MIMIV	GO:0016020	4539	Phypoly-transcript-04747	0.112	SM1
Phypoly-transcript-02488	1.06439e-24	0.74019	0.975	0.853	1.60936e-20	0	NCBP1_DICDI	GO:0016070|GO:0003723|GO:0005515	MIF4G like|MIF4G domain	Phypoly-transcript-02488	0.122	SM1
Phypoly-transcript-16203	1.88611e-22	0.738861	0.949	0.775	2.8518e-18	0	EMC3_DICDI	GO:0016020	2201	Phypoly-transcript-16203	0.174	SM1
Phypoly-transcript-04006	2.42619e-31	0.738671	0.985	0.91	3.6684e-27	0	DDX56_DICDI	GO:0003676|GO:0004386|GO:0005524|GO:0003676|GO:0004386|GO:0005524|GO:0003676|GO:0005524|GO:0008026	Superfamilies 1 and 2 helicase C-terminal domain profile.|Helicase conserved C-terminal domain|DEAD/DEAH box helicase	Phypoly-transcript-04006	0.075	SM1
Phypoly-transcript-14030	2.10427e-26	0.73865	0.944	0.717	3.18165e-22	0	ISP7_SCHPO	GO:0016491|GO:0016706|GO:0055114	24	Phypoly-transcript-14030	0.227	SM1
Phypoly-transcript-11784	2.46107e-22	0.738495	0.975	0.777	3.72113e-18	0	AXIN2_HUMAN	GO:0038032|GO:0038032	Regulator of G protein signaling domain|RGS domain profile.	Phypoly-transcript-11784	0.198	SM1
Phypoly-transcript-14239	8.65481e-23	0.73782	0.954	0.711	1.30861e-18	0	noGene	GO:0007269|GO:0008021	4319	Phypoly-transcript-14239	0.243	SM1
Phypoly-transcript-05542	1.7991e-27	0.737701	0.98	0.844	2.72024e-23	0	noGene	GO:0008146	4287	Phypoly-transcript-05542	0.136	SM1
Phypoly-transcript-09316	1.84789e-15	0.737582	0.802	0.497	2.79401e-11	0	POLK_SCHPO	GO:0003684|GO:0003887|GO:0006281|GO:0003684|GO:0003887|GO:0006281|GO:0003684|GO:0003887|GO:0006281	impB/mucB/samB family|impB/mucB/samB family C-terminal domain|UmuC domain profile.	Phypoly-transcript-09316	0.305	SM1
Phypoly-transcript-05485	5.94794e-23	0.737529	0.949	0.853	8.99329e-19	0	MANBA_CAPHI	GO:0004553|GO:0005975	1869	Phypoly-transcript-05485	0.096	SM1
Phypoly-transcript-07778	9.58685e-25	0.737249	0.909	0.671	1.44953e-20	0	PABP_ASHGO	GO:0003676	1497	Phypoly-transcript-07778	0.238	SM1
Phypoly-transcript-11098	7.2022e-17	0.736765	0.67	0.327	1.08897e-12	0	noGene	GO:0016787|GO:0016787	Nudix hydrolase domain profile.|NUDIX domain	Phypoly-transcript-11098	0.343	SM1
Phypoly-transcript-08432	3.64361e-27	0.736621	0.975	0.798	5.50913e-23	0	Y2544_DICDI	GO:0006810|GO:0016020	3616	Phypoly-transcript-08432	0.177	SM1
Phypoly-transcript-10300	1.47416e-37	0.736423	0.98	0.777	2.22893e-33	0	FPS_DICDI	GO:0008299|GO:0008299|GO:0008299	Polyprenyl synthases signature 1.|Polyprenyl synthetase|Polyprenyl synthases signature 2.	Phypoly-transcript-10300	0.203	SM1
Phypoly-transcript-05387	3.21849e-22	0.736219	0.964	0.855	4.86636e-18	0	TAF12_HUMAN	GO:0005669|GO:0006352	4492	Phypoly-transcript-05387	0.109	SM1
Phypoly-transcript-21347	1.63573e-21	0.735556	0.949	0.734	2.47323e-17	0	TP4AA_DICDI	GO:0004725|GO:0006470|GO:0004725|GO:0016311|GO:0016791|GO:0016311|GO:0016791	Protein-tyrosine phosphatase|Tyrosine specific protein phosphatases active site.|Tyrosine specific protein phosphatases family profile.	Phypoly-transcript-21347	0.215	SM1
Phypoly-transcript-19309	1.25755e-14	0.735179	0.736	0.448	1.90141e-10	0	PUAC_STRAD	GO:0008080|GO:0005509|GO:0007156|GO:0016020|GO:0008080	Gcn5-related N-acetyltransferase (GNAT) domain profile.|Cadherins domain profile.|Acetyltransferase (GNAT) domain	Phypoly-transcript-19309	0.288	SM1
Phypoly-transcript-04544	5.62317e-35	0.734913	0.985	0.844	8.50223e-31	0	YGL4_YEAST	GO:0055085	2819	Phypoly-transcript-04544	0.141	SM1
Phypoly-transcript-02529	5.53645e-25	0.734851	0.964	0.841	8.37112e-21	0	FBW1B_MOUSE	GO:0003910|GO:0005524|GO:0006281|GO:0006310	383	Phypoly-transcript-02529	0.123	SM1
Phypoly-transcript-20578	3.22847e-20	0.73466	0.898	0.627	4.88144e-16	0	CBPB_DICDI	GO:0005509|GO:0005509	EF-hand calcium-binding domain profile.|EF-hand domain pair	Phypoly-transcript-20578	0.271	SM1
Phypoly-transcript-02875	1.73199e-26	0.734248	0.985	0.827	2.61877e-22	0	RHAG_HUMAN	GO:0008519|GO:0015696|GO:0016020|GO:0005515	Ammonium Transporter Family|Ankyrin repeat profile.	Phypoly-transcript-02875	0.158	SM1
Phypoly-transcript-11229	2.97402e-22	0.733373	0.914	0.621	4.49672e-18	0	KCC1D_MOUSE	GO:0004674|GO:0006468|GO:0004672|GO:0005524|GO:0006468|GO:0004672|GO:0005524|GO:0006468	Serine/Threonine protein kinases active-site signature.|Protein kinase domain profile.|Protein kinase domain	Phypoly-transcript-11229	0.293	SM1
Phypoly-transcript-03665	8.13603e-20	0.732993	0.848	0.538	1.23017e-15	0	XYLS_SULSO	GO:0004553|GO:0005975	1872	Phypoly-transcript-03665	0.31	SM1
Phypoly-transcript-15989	1.92492e-17	0.732936	0.893	0.656	2.91048e-13	0	TTC1_BOVIN	GO:0005515|GO:0005515|GO:0005515	TPR repeat profile.|TPR repeat region circular profile.|Tetratricopeptide repeat	Phypoly-transcript-15989	0.237	SM1
Phypoly-transcript-05969	7.82194e-23	0.732897	0.959	0.751	1.18268e-18	0	HIW_DROME	GO:0005515|GO:0008270|GO:0008270	Zinc finger RING-type profile.|IBR domain	Phypoly-transcript-05969	0.208	SM1
Phypoly-transcript-05726	1.94893e-23	0.732718	0.954	0.711	2.94679e-19	0	TAF6_SCHPO	GO:0005634|GO:0006352|GO:0005634|GO:0051090	TATA box binding protein associated factor (TAF)|Protein of unknown function (DUF1546)	Phypoly-transcript-05726	0.243	SM1
Phypoly-transcript-04675	1.14878e-22	0.732267	0.964	0.78	1.73695e-18	0	CYS2_SCHPO	GO:0008531|GO:0009231	3686	Phypoly-transcript-04675	0.184	SM1
Phypoly-transcript-12669	5.25592e-23	0.732115	0.959	0.812	7.94695e-19	0	SCP1_ASTLP	GO:0005509|GO:0005509|GO:0005509	EF hand|EF-hand domain pair|EF-hand calcium-binding domain profile.	Phypoly-transcript-12669	0.147	SM1
Phypoly-transcript-03674	5.89618e-27	0.731818	0.985	0.803	8.91502e-23	0	DRP5A_ARATH	GO:0003924|GO:0005525	1342	Phypoly-transcript-03674	0.182	SM1
Phypoly-transcript-11501	7.11168e-27	0.731317	0.975	0.812	1.07529e-22	0	CPSF6_DROME	GO:0003676|GO:0003676	Eukaryotic RNA Recognition Motif (RRM) profile.|RNA recognition motif. (a.k.a. RRM, RBD, or RNP domain)	Phypoly-transcript-11501	0.163	SM1
Phypoly-transcript-11625	9.33058e-26	0.730954	0.97	0.72	1.41078e-21	0	Y3136_ARATH	GO:0016491|GO:0055114	4343	Phypoly-transcript-11625	0.25	SM1
Phypoly-transcript-14643	1.5711e-24	0.7306	0.741	0.298	2.37551e-20	0	APLF_HUMAN	GO:0004674|GO:0006468|GO:0004672|GO:0005524|GO:0006468|GO:0004672|GO:0005524|GO:0006468|GO:0005524|GO:0005515|GO:0005515	Serine/Threonine protein kinases active-site signature.|Protein kinase domain|Protein kinase domain profile.|Protein kinases ATP-binding region signature.|FHA domain|Forkhead-associated (FHA) domain profile.	Phypoly-transcript-14643	0.443	SM1
Phypoly-transcript-10637	7.91491e-26	0.730548	0.985	0.792	1.19673e-21	0	PSMD6_DICDI	GO:0005515	2903	Phypoly-transcript-10637	0.193	SM1
Phypoly-transcript-21477	1.94573e-17	0.730523	0.868	0.587	2.94195e-13	0	PPIA_DICD3	GO:0003755|GO:0006457|GO:0003755|GO:0006457	Cyclophilin type peptidyl-prolyl cis-trans isomerase/CLD|Cyclophilin-type peptidyl-prolyl cis-trans isomerase domain profile.	Phypoly-transcript-21477	0.281	SM1
Phypoly-transcript-04258	6.36675e-25	0.730097	0.99	0.847	9.62653e-21	0	GUNX_CLOTM	GO:0006629|GO:0016788	1756	Phypoly-transcript-04258	0.143	SM1
Phypoly-transcript-07254	8.89983e-27	0.729655	0.98	0.855	1.34565e-22	0	HMDH2_DICDI	GO:0004420|GO:0015936|GO:0050662|GO:0055114|GO:0004420|GO:0055114|GO:0004420|GO:0015936|GO:0050662|GO:0055114|GO:0004420|GO:0055114|GO:0004420|GO:0055114	Hydroxymethylglutaryl-coenzyme A reductases family profile.|Hydroxymethylglutaryl-coenzyme A reductases signature 1.|Hydroxymethylglutaryl-coenzyme A reductase|Hydroxymethylglutaryl-coenzyme A reductases signature 3.|Hydroxymethylglutaryl-coenzyme A reductases signature 2.	Phypoly-transcript-07254	0.125	SM1
Phypoly-transcript-09371	1.44264e-25	0.729501	0.99	0.919	2.18128e-21	0	IVD_ORYSJ	GO:0003995|GO:0055114|GO:0016627|GO:0055114|GO:0008152|GO:0016627|GO:0050660|GO:0055114|GO:0003995|GO:0055114|GO:0003995|GO:0055114	Acyl-CoA dehydrogenase, middle domain|Acyl-CoA dehydrogenase, C-terminal domain|Acyl-CoA dehydrogenase, N-terminal domain|Acyl-CoA dehydrogenases signature 2.|Acyl-CoA dehydrogenases signature 1.	Phypoly-transcript-09371	0.071	SM1
Phypoly-transcript-03545	3.86313e-24	0.729492	0.97	0.76	5.84105e-20	0	SUGT1_DICDI	GO:0005515|GO:0005515|GO:0005515	Trp-Asp (WD) repeats circular profile.|Trp-Asp (WD) repeats profile.|WD domain, G-beta repeat	Phypoly-transcript-03545	0.21	SM1
Phypoly-transcript-00640	1.30637e-26	0.729409	0.98	0.945	1.97524e-22	0	EPS15_DICDI	GO:0005509|GO:0005515	EF-hand calcium-binding domain profile.|EH domain profile.	Phypoly-transcript-00640	0.035	SM1
Phypoly-transcript-01190	1.33895e-24	0.729385	0.97	0.838	2.0245e-20	0	BMT2_SCHPO	GO:0003910|GO:0005524|GO:0006281|GO:0006310|GO:0003909|GO:0051103	ATP dependent DNA ligase domain|ATP-dependent DNA ligase signature 2.	Phypoly-transcript-01190	0.132	SM1
Phypoly-transcript-12458	1.84541e-17	0.729306	0.827	0.566	2.79026e-13	0	PANC_DICDI	GO:0004592|GO:0015940	2879	Phypoly-transcript-12458	0.261	SM1
Phypoly-transcript-07827	1.35809e-28	0.728653	0.98	0.864	2.05342e-24	0	MYLKB_DICDI	GO:0005524|GO:0005515|GO:0005515|GO:0004672|GO:0005524|GO:0006468|GO:0004674|GO:0006468|GO:0004672|GO:0005524|GO:0006468	Protein kinases ATP-binding region signature.|C2 domain|C2 domain profile.|Protein kinase domain|Serine/Threonine protein kinases active-site signature.|Protein kinase domain profile.	Phypoly-transcript-07827	0.116	SM1
Phypoly-transcript-02581	9.7288e-20	0.728473	0.949	0.832	1.47099e-15	0	TPPC1_DICDI	GO:0005515|GO:0005515	Fz domain|Frizzled (fz) domain profile.	Phypoly-transcript-02581	0.117	SM1
Phypoly-transcript-14727	2.08182e-28	0.728351	0.985	0.743	3.14771e-24	0	SSRA_DICDI	GO:0005783	4525	Phypoly-transcript-14727	0.242	SM1
Phypoly-transcript-03657	3.34051e-26	0.727734	0.985	0.867	5.05085e-22	0	Y9865_DICDI	GO:0004672|GO:0005524|GO:0006468|GO:0004672|GO:0005524|GO:0006468|GO:0004674|GO:0006468	Protein kinase domain|Protein kinase domain profile.|Serine/Threonine protein kinases active-site signature.	Phypoly-transcript-03657	0.118	SM1
Phypoly-transcript-30716	2.28522e-25	0.727631	0.716	0.277	3.45525e-21	0	noGene	GO:0005524	426	Phypoly-transcript-30716	0.439	SM1
Phypoly-transcript-01258	2.69242e-22	0.727591	0.964	0.89	4.07093e-18	0	DAW1_XENLA	GO:0005515|GO:0008289|GO:0005515|GO:0005515|GO:0005515	WD domain, G-beta repeat|START domain profile.|Trp-Asp (WD) repeats circular profile.|F-box domain profile.|Trp-Asp (WD) repeats profile.	Phypoly-transcript-01258	0.074	SM1
Phypoly-transcript-05965	2.79342e-28	0.726992	0.975	0.829	4.22365e-24	0	GALDH_ARATH	GO:0005515|GO:0005515|GO:0007165	NHL repeat|TIR domain	Phypoly-transcript-05965	0.146	SM1
Phypoly-transcript-03143	4.42163e-18	0.726829	0.924	0.734	6.6855e-14	0	DNLI_HAEIN	GO:0003910|GO:0005524|GO:0006281|GO:0006310	383	Phypoly-transcript-03143	0.19	SM1
Phypoly-transcript-21138	1.36837e-28	0.726744	0.975	0.731	2.06897e-24	0	CML6_ORYSJ	GO:0005509|GO:0005509	EF-hand calcium-binding domain profile.|EF-hand domain pair	Phypoly-transcript-21138	0.244	SM1
Phypoly-transcript-03879	1.19649e-19	0.726532	0.929	0.697	1.80909e-15	0	KUP2_MAGSA	GO:0015079|GO:0016020|GO:0071805	2256	Phypoly-transcript-03879	0.232	SM1
Phypoly-transcript-11095	1.23899e-25	0.726421	0.97	0.74	1.87336e-21	0	PLB1_MONDO	GO:0006629|GO:0016788	1756	Phypoly-transcript-11095	0.23	SM1
Phypoly-transcript-02006	1.30125e-19	0.726272	0.898	0.714	1.96749e-15	0	RNZ2_MACFA	GO:0008033	4593	Phypoly-transcript-02006	0.184	SM1
Phypoly-transcript-06130	1.75755e-25	0.726068	0.985	0.844	2.65742e-21	0	PURA_DICDI	GO:0004019|GO:0005525|GO:0006164|GO:0004019|GO:0005525|GO:0006164|GO:0004019|GO:0005525|GO:0006164	Adenylosuccinate synthetase GTP-binding site.|Adenylosuccinate synthetase|Adenylosuccinate synthetase active site.	Phypoly-transcript-06130	0.141	SM1
Phypoly-transcript-13655	3.48423e-23	0.725926	0.975	0.783	5.26816e-19	0	AIF1_RAT	GO:0005509|GO:0005509	EF-hand domain pair|EF-hand calcium-binding domain profile.	Phypoly-transcript-13655	0.192	SM1
Phypoly-transcript-06537	1.32662e-25	0.725816	0.959	0.766	2.00585e-21	0	CP4FE_MOUSE	GO:0016705|GO:0055114|GO:0005506|GO:0016705|GO:0020037|GO:0055114	Cytochrome P450 cysteine heme-iron ligand signature.|Cytochrome P450	Phypoly-transcript-06537	0.193	SM1
Phypoly-transcript-00365	6.03712e-26	0.725512	0.985	0.893	9.12813e-22	0	Y4399_DICDI	GO:0005515|GO:0005515|GO:0005515	Trp-Asp (WD) repeats circular profile.|Trp-Asp (WD) repeats profile.|WD domain, G-beta repeat	Phypoly-transcript-00365	0.092	SM1
Phypoly-transcript-31100	1.22044e-13	0.725332	0.543	0.243	1.84531e-09	0	ABCC3_DICDI	GO:0005524|GO:0006810|GO:0016021|GO:0042626|GO:0055085|GO:0005524|GO:0006810|GO:0016021|GO:0042626|GO:0055085	ABC transporter transmembrane region|ABC transporter integral membrane type-1 fused domain profile.	Phypoly-transcript-31100	0.3	SM1
Phypoly-transcript-06395	1.84403e-33	0.72525	0.985	0.87	2.78817e-29	0	LIMD_DICDI	GO:0005515|GO:0005515	BTB/POZ domain|BTB domain profile.	Phypoly-transcript-06395	0.115	SM1
Phypoly-transcript-01943	1.51871e-14	0.724885	0.873	0.714	2.29628e-10	0	SUV91_BOVIN	GO:0005634|GO:0008270|GO:0018024|GO:0034968|GO:0005515|GO:0005634|GO:0008270|GO:0018024|GO:0034968|GO:0005515	Pre-SET motif|SET domain profile.|Pre-SET domain profile.|SET domain	Phypoly-transcript-01943	0.159	SM1
Phypoly-transcript-02311	1.33989e-28	0.724732	0.99	0.928	2.02591e-24	0	GLE1_BOVIN	GO:0005643|GO:0016973	1774	Phypoly-transcript-02311	0.062	SM1
Phypoly-transcript-13551	2.858e-19	0.724483	0.964	0.806	4.3213e-15	0	EFC11_MOUSE	GO:0005509|GO:0005509|GO:0005509	EF-hand domain pair|EF-hand calcium-binding domain profile.|EF hand	Phypoly-transcript-13551	0.158	SM1
Phypoly-transcript-08363	1.50989e-34	0.724353	0.98	0.798	2.28295e-30	0	ENO_MESCR	GO:0000015|GO:0000287|GO:0004634|GO:0006096|GO:0000015|GO:0000287|GO:0004634|GO:0006096|GO:0000015|GO:0000287|GO:0004634|GO:0006096	Enolase, C-terminal TIM barrel domain|Enolase signature.|Enolase, N-terminal domain	Phypoly-transcript-08363	0.182	SM1
Phypoly-transcript-02236	3.54836e-21	0.724344	0.954	0.754	5.36512e-17	0	MTR1_DICDI	GO:0008168|GO:0032259|GO:0003676|GO:0003676	FtsJ-like methyltransferase|G-patch domain|G-patch domain profile.	Phypoly-transcript-02236	0.2	SM1
Phypoly-transcript-15660	2.05607e-14	0.723824	0.827	0.607	3.10877e-10	0	YKK1_SCHPO	GO:0016491|GO:0055114|GO:0008270|GO:0016491|GO:0055114	Alcohol dehydrogenase GroES-like domain|Zinc-binding dehydrogenase	Phypoly-transcript-15660	0.22	SM1
Phypoly-transcript-14080	6.20383e-24	0.72339	0.964	0.737	9.38019e-20	0	RAB18_DICDI	GO:0005525|GO:0007264	3588	Phypoly-transcript-14080	0.227	SM1
Phypoly-transcript-12672	7.50337e-22	0.722998	0.959	0.749	1.13451e-17	0	BUB2_DICDI	GO:0005097|GO:0032313|GO:0005097|GO:0032313	TBC/rab GAP domain profile.|Rab-GTPase-TBC domain	Phypoly-transcript-12672	0.21	SM1
Phypoly-transcript-08611	4.97193e-24	0.722195	0.97	0.763	7.51756e-20	0	SYWC_DICDI	GO:0000166|GO:0004812|GO:0005524|GO:0006418	4585	Phypoly-transcript-08611	0.207	SM1
Phypoly-transcript-15514	3.60098e-21	0.72181	0.97	0.827	5.44468e-17	0	YIPF6_DICDI	GO:0016020	4930	Phypoly-transcript-15514	0.143	SM1
Phypoly-transcript-07461	1.39947e-23	0.721762	0.949	0.697	2.116e-19	0	GSHR_DICDI	GO:0045454|GO:0055114|GO:0016491|GO:0055114|GO:0016668|GO:0055114|GO:0016491|GO:0050660|GO:0055114	Pyridine nucleotide-disulphide oxidoreductase, dimerisation domain|Pyridine nucleotide-disulphide oxidoreductase|Pyridine nucleotide-disulphide oxidoreductases class-I active site.|Pyridine nucleotide-disulphide oxidoreductase	Phypoly-transcript-07461	0.252	SM1
Phypoly-transcript-09287	8.36869e-13	0.721212	0.609	0.327	1.26535e-08	0	OMA1_SCHPO	GO:0004222|GO:0006508|GO:0016020	2943	Phypoly-transcript-09287	0.282	SM1
Phypoly-transcript-12433	5.03067e-25	0.720829	0.975	0.78	7.60638e-21	0	VPS26_DICDI	GO:0007034|GO:0030904	4816	Phypoly-transcript-12433	0.195	SM1
Phypoly-transcript-11376	4.7468e-25	0.720211	0.964	0.803	7.17716e-21	0	LPAT5_ARATH	GO:0008152|GO:0016746	145	Phypoly-transcript-11376	0.161	SM1
Phypoly-transcript-06332	2.9759e-28	0.720172	0.975	0.829	4.49957e-24	0	Y1954_ARCFU	GO:0016884	249	Phypoly-transcript-06332	0.146	SM1
Phypoly-transcript-08177	2.60683e-22	0.719417	0.898	0.604	3.94152e-18	0	PCLO_RAT	GO:0005515|GO:0005515	C2 domain profile.|C2 domain	Phypoly-transcript-08177	0.294	SM1
Phypoly-transcript-03508	1.72533e-25	0.719333	0.985	0.942	2.6087e-21	0	TUP1_DICDI	GO:0005515|GO:0005515|GO:0005515	Trp-Asp (WD) repeats profile.|WD domain, G-beta repeat|Trp-Asp (WD) repeats circular profile.	Phypoly-transcript-03508	0.043	SM1
Phypoly-transcript-04925	9.91961e-23	0.719265	0.944	0.792	1.49985e-18	0	noGene	GO:0005515|GO:0005515|GO:0005515	TPR repeat region circular profile.|TPR repeat profile.|Tetratricopeptide repeat	Phypoly-transcript-04925	0.152	SM1
Phypoly-transcript-06887	1.996e-22	0.719124	0.802	0.41	3.01795e-18	0	MNMA_STAHJ	GO:0005737|GO:0008033|GO:0016740	4571	Phypoly-transcript-06887	0.392	SM1
Phypoly-transcript-05958	4.03306e-16	0.718979	0.68	0.321	6.09798e-12	0	TTK_HUMAN	GO:0005524|GO:0004674|GO:0006468|GO:0004672|GO:0005524|GO:0006468|GO:0004672|GO:0005524|GO:0006468	Protein kinases ATP-binding region signature.|Serine/Threonine protein kinases active-site signature.|Protein kinase domain profile.|Protein kinase domain	Phypoly-transcript-05958	0.359	SM1
Phypoly-transcript-30012	2.48178e-17	0.718962	0.909	0.647	3.75246e-13	0	CALM_PLAFA	GO:0005509|GO:0005509	EF-hand domain pair|EF-hand calcium-binding domain profile.	Phypoly-transcript-30012	0.262	SM1
Phypoly-transcript-10707	1.34749e-27	0.718815	0.975	0.821	2.0374e-23	0	TISB_HUMAN	GO:0046872|GO:0046872	Zinc finger C3H1-type profile.|Zinc finger C-x8-C-x5-C-x3-H type (and similar)	Phypoly-transcript-10707	0.154	SM1
Phypoly-transcript-03791	6.59604e-25	0.718806	0.975	0.801	9.97322e-21	0	GEFA_DICDI	GO:0005085|GO:0005622|GO:0007264|GO:0005085|GO:0005622|GO:0051056|GO:0005085|GO:0005622|GO:0007264|GO:0005085|GO:0005622|GO:0051056	Ras guanine-nucleotide exchange factors catalytic domain profile.|RasGEF N-terminal motif|RasGEF domain|Ras guanine-nucleotide exchange factors N-terminal domain profile.	Phypoly-transcript-03791	0.174	SM1
Phypoly-transcript-11024	6.0902e-20	0.718442	0.939	0.688	9.20838e-16	0	SAE1_PONAB	GO:0003824	4399	Phypoly-transcript-11024	0.251	SM1
Phypoly-transcript-29650	2.56609e-20	0.718247	0.944	0.694	3.87993e-16	0	TAF13_DICDI	GO:0006366	4486	Phypoly-transcript-29650	0.25	SM1
Phypoly-transcript-11070	1.57689e-26	0.717876	0.97	0.772	2.38426e-22	0	DRG1_DICDI	GO:0005525|GO:0005525	50S ribosome-binding GTPase|GTP1/OBG family signature.	Phypoly-transcript-11070	0.198	SM1
Phypoly-transcript-06765	2.41743e-22	0.71765	0.949	0.705	3.65515e-18	0	TIPD_DICDI	GO:0005515|GO:0005515|GO:0005515	Trp-Asp (WD) repeats circular profile.|Trp-Asp (WD) repeats profile.|WD domain, G-beta repeat	Phypoly-transcript-06765	0.244	SM1
Phypoly-transcript-18029	1.36318e-25	0.717281	0.975	0.725	2.06113e-21	0	RING1_GOSHI	GO:0005515|GO:0008270|GO:0005515|GO:0008270	Ring finger domain|Zinc finger RING-type profile.	Phypoly-transcript-18029	0.25	SM1
Phypoly-transcript-07293	6.67408e-26	0.717	0.97	0.786	1.00912e-21	0	NDUV1_DICDI	GO:0016651|GO:0051539|GO:0055114|GO:0008137|GO:0010181|GO:0051539|GO:0055114|GO:0008137|GO:0010181|GO:0051539|GO:0055114	Respiratory-chain NADH dehydrogenase 51 Kd subunit|NADH-ubiquinone oxidoreductase-F iron-sulfur binding region|Respiratory-chain NADH dehydrogenase 51 Kd subunit signature 1.|Respiratory-chain NADH dehydrogenase 51 Kd subunit signature 2.	Phypoly-transcript-07293	0.184	SM1
Phypoly-transcript-23749	1.056e-24	0.716865	0.959	0.737	1.59667e-20	0	noGene	GO:0008152|GO:0016787	2938	Phypoly-transcript-23749	0.222	SM1
Phypoly-transcript-04240	2.23416e-24	0.716758	0.98	0.934	3.37806e-20	0	STRN_HUMAN	GO:0005515|GO:0005515|GO:0005515	Trp-Asp (WD) repeats profile.|Trp-Asp (WD) repeats circular profile.|WD domain, G-beta repeat	Phypoly-transcript-04240	0.046	SM1
Phypoly-transcript-05651	4.32962e-24	0.716474	0.97	0.78	6.54639e-20	0	YBIA_SHIBS	GO:0005515	577	Phypoly-transcript-05651	0.19	SM1
Phypoly-transcript-06201	2.18942e-21	0.716345	0.909	0.679	3.3104e-17	0	FOLC_DICDI	GO:0004326|GO:0005524|GO:0009396	1646	Phypoly-transcript-06201	0.23	SM1
Phypoly-transcript-04273	1.52613e-24	0.716289	0.97	0.844	2.30751e-20	0	Y0670_DICDI	GO:0004672|GO:0005524|GO:0006468|GO:0004674|GO:0006468|GO:0004672|GO:0005524|GO:0006468|GO:0004674|GO:0005524|GO:0006468|GO:0004674|GO:0005524|GO:0006468	Protein kinase domain profile.|Serine/Threonine protein kinases active-site signature.|Protein kinase domain|AGC-kinase C-terminal domain profile.|Protein kinase C terminal domain	Phypoly-transcript-04273	0.126	SM1
Phypoly-transcript-05025	1.3923e-21	0.716269	0.924	0.728	2.10516e-17	0	DNLI_HAEIN	GO:0003910|GO:0005524|GO:0006281|GO:0006310	383	Phypoly-transcript-05025	0.196	SM1
Phypoly-transcript-04969	6.78068e-24	0.716044	0.975	0.931	1.02524e-19	0	CTSR1_MOUSE	GO:0005216|GO:0006811|GO:0016020|GO:0055085	2221	Phypoly-transcript-04969	0.044	SM1
Phypoly-transcript-28466	2.9391e-18	0.715856	0.893	0.676	4.44391e-14	0	CNDP2_HUMAN	GO:0008152|GO:0016787	2938	Phypoly-transcript-28466	0.217	SM1
Phypoly-transcript-11199	1.7462e-20	0.715615	0.939	0.699	2.64026e-16	0	YGC1_SCHPO	GO:0005515|GO:0005515	TPR repeat profile.|TPR repeat region circular profile.	Phypoly-transcript-11199	0.24	SM1
Phypoly-transcript-23086	2.0547e-22	0.715523	0.975	0.772	3.10671e-18	0	NTF2_EMENI	GO:0005622|GO:0006810	2771	Phypoly-transcript-23086	0.203	SM1
Phypoly-transcript-02713	4.72026e-23	0.715108	0.975	0.853	7.13704e-19	0	RRS1_DICDI	GO:0005634	325	Phypoly-transcript-02713	0.122	SM1
Phypoly-transcript-14185	1.29762e-14	0.714649	0.655	0.35	1.962e-10	0	YKTD_BACSU	GO:0008168|GO:0032259	2329	Phypoly-transcript-14185	0.305	SM1
Phypoly-transcript-07788	2.84242e-16	0.713807	0.909	0.618	4.29775e-12	0	NDH_DICDI	GO:0016491|GO:0055114|GO:0016491|GO:0050660|GO:0055114	3521	Phypoly-transcript-07788	0.291	SM1
Phypoly-transcript-07864	8.06881e-17	0.713517	0.888	0.595	1.22e-12	0	LAP2_ARTOC	GO:0006508|GO:0008233	2940	Phypoly-transcript-07864	0.293	SM1
Phypoly-transcript-12446	2.93877e-14	0.713371	0.772	0.506	4.44342e-10	0	KDSR_DICDI	GO:0008152|GO:0016491	4110	Phypoly-transcript-12446	0.266	SM1
Phypoly-transcript-13300	5.28329e-21	0.713189	0.975	0.827	7.98833e-17	0	YTH1_YARLI	GO:0046872|GO:0046872	Zinc finger C3H1-type profile.|Zinc finger C-x8-C-x5-C-x3-H type (and similar)	Phypoly-transcript-13300	0.148	SM1
Phypoly-transcript-04130	1.36468e-24	0.713152	0.959	0.832	2.0634e-20	0	IRC3_YEAST	GO:0003677|GO:0005524|GO:0016787	4639	Phypoly-transcript-04130	0.127	SM1
Phypoly-transcript-15374	5.97477e-18	0.71306	0.782	0.465	9.03385e-14	0	DYR_HAEIN	GO:0004146|GO:0006545|GO:0009165|GO:0055114|GO:0004146|GO:0055114|GO:0004146|GO:0006545|GO:0009165|GO:0055114	Dihydrofolate reductase (DHFR) domain profile.|Dihydrofolate reductase (DHFR) domain signature.|Dihydrofolate reductase	Phypoly-transcript-15374	0.317	SM1
Phypoly-transcript-00917	1.86283e-22	0.713046	0.995	0.957	2.8166e-18	0	IF2P_HUMAN	GO:0005525|GO:0003924|GO:0005525	Elongation factor Tu domain 2|Elongation factor Tu GTP binding domain	Phypoly-transcript-00917	0.038	SM1
Phypoly-transcript-18169	1.9472e-25	0.712707	0.975	0.809	2.94417e-21	0	CH10_SCHPO	GO:0005737|GO:0006457	724	Phypoly-transcript-18169	0.166	SM1
Phypoly-transcript-02340	3.66058e-25	0.712383	0.97	0.847	5.53479e-21	0	ALKB_ECOLI	GO:0003910|GO:0005524|GO:0006281|GO:0006310	383	Phypoly-transcript-02340	0.123	SM1
Phypoly-transcript-07682	2.3182e-20	0.712288	0.964	0.783	3.50512e-16	0	CP3AA_MESAU	GO:0005506|GO:0016705|GO:0020037|GO:0055114	974	Phypoly-transcript-07682	0.181	SM1
Phypoly-transcript-15131	3.52184e-21	0.712118	0.939	0.705	5.32502e-17	0	AIM2_YEAST	GO:0016787	1071	Phypoly-transcript-15131	0.234	SM1
Phypoly-transcript-00576	2.56319e-19	0.711966	0.817	0.457	3.87555e-15	0	ABCC3_DICDI	GO:0005524|GO:0016887|GO:0005524|GO:0006810|GO:0016021|GO:0042626|GO:0055085|GO:0005524|GO:0006810|GO:0016021|GO:0042626|GO:0055085|GO:0005524|GO:0016887|GO:0005524|GO:0016887	ATP-binding cassette, ABC transporter-type domain profile.|ABC transporter transmembrane region|ABC transporter integral membrane type-1 fused domain profile.|ABC transporter|ABC transporters family signature.	Phypoly-transcript-00576	0.36	SM1
Phypoly-transcript-06751	1.43985e-25	0.711877	0.97	0.757	2.17706e-21	0	CF106_DANRE	GO:0005515	2899	Phypoly-transcript-06751	0.213	SM1
Phypoly-transcript-10268	6.37073e-20	0.711865	0.964	0.763	9.63254e-16	0	noGene	GO:0008152|GO:0016746	145	Phypoly-transcript-10268	0.201	SM1
Phypoly-transcript-02421	1.34688e-26	0.711692	0.975	0.858	2.03649e-22	0	HAUS1_MOUSE	GO:0005515	4006	Phypoly-transcript-02421	0.117	SM1
Phypoly-transcript-11358	2.02005e-22	0.711608	0.959	0.723	3.05432e-18	0	3HID1_ARATH	GO:0004616|GO:0006098|GO:0055114	2656	Phypoly-transcript-11358	0.236	SM1
Phypoly-transcript-24893	1.33028e-08	0.711514	0.279	0.095	0.000201138	0	noGene	GO:0016491|GO:0050660|GO:0055114	481	Phypoly-transcript-24893	0.184	SM1
Phypoly-transcript-23948	1.69941e-27	0.711362	0.98	0.908	2.56951e-23	0	G6PI_DICDI	GO:0004347|GO:0006094|GO:0006096|GO:0004347|GO:0006094|GO:0006096|GO:0004347|GO:0006094|GO:0006096	Glucose-6-phosphate isomerase family profile.|Phosphoglucose isomerase|Phosphoglucose isomerase signature 1.	Phypoly-transcript-23948	0.072	SM1
Phypoly-transcript-07711	1.50737e-22	0.710908	0.97	0.85	2.27914e-18	0	FACE1_ARATH	GO:0004222|GO:0006508|GO:0016020	2943	Phypoly-transcript-07711	0.12	SM1
Phypoly-transcript-02866	2.07284e-23	0.710817	0.975	0.803	3.13413e-19	0	K6PF_DICDI	GO:0003872|GO:0005945|GO:0006096|GO:0003872|GO:0005945|GO:0006096	Phosphofructokinase signature.|Phosphofructokinase	Phypoly-transcript-02866	0.172	SM1
Phypoly-transcript-02967	7.9096e-26	0.710614	0.975	0.786	1.19593e-21	0	UBPA_DICDI	GO:0004221|GO:0006511|GO:0004221|GO:0006511|GO:0004221|GO:0006511|GO:0008270|GO:0005515|GO:0008270|GO:0004221|GO:0006511	Ubiquitin carboxyl-terminal hydrolases family 2 signature 1.|Ubiquitin carboxyl-terminal hydrolase|Ubiquitin carboxyl-terminal hydrolases family 2 signature 2.|Zinc finger UBP-type profile.|UBA/TS-N domain|Zn-finger in ubiquitin-hydrolases and other protein|Ubiquitin carboxyl-terminal hydrolases family 2 profile.	Phypoly-transcript-02967	0.189	SM1
Phypoly-transcript-04212	7.90402e-25	0.710277	0.97	0.801	1.19509e-20	0	BGLB_CLOTH	GO:0004553|GO:0005975|GO:0004553|GO:0005975	Glycosyl hydrolase family 3 N terminal domain|Glycosyl hydrolase family 3 C-terminal domain	Phypoly-transcript-04212	0.169	SM1
Phypoly-transcript-11938	1.40586e-22	0.709868	0.954	0.717	2.12566e-18	0	TRAF6_RAT	GO:0005515|GO:0008270|GO:0008270	Zinc finger RING-type profile.|Zinc finger TRAF-type profile.	Phypoly-transcript-11938	0.237	SM1
Phypoly-transcript-16459	7.84505e-30	0.709787	0.97	0.728	1.18617e-25	0	YOXD_BACSU	GO:0008152|GO:0016491	4110	Phypoly-transcript-16459	0.242	SM1
Phypoly-transcript-11151	1.04427e-25	0.709712	0.975	0.746	1.57893e-21	0	NSDHL_DICDI	GO:0003854|GO:0006694|GO:0016616|GO:0055114	26	Phypoly-transcript-11151	0.229	SM1
Phypoly-transcript-07560	4.94052e-30	0.708887	0.98	0.87	7.47007e-26	0	HMP_RHIME	GO:0005506|GO:0020037|GO:0005506|GO:0020037|GO:0016491|GO:0055114|GO:0016491|GO:0055114	Globin family profile.|Globin|Oxidoreductase NAD-binding domain|Ferredoxin reductase-type FAD binding domain profile.	Phypoly-transcript-07560	0.11	SM1
Phypoly-transcript-10655	8.27996e-24	0.708618	0.98	0.829	1.25193e-19	0	S35F4_HUMAN	GO:0006810|GO:0016021	1494	Phypoly-transcript-10655	0.151	SM1
Phypoly-transcript-10928	5.34134e-23	0.708479	0.97	0.751	8.07611e-19	0	ODBB_DICDI	GO:0003824|GO:0008152	4511	Phypoly-transcript-10928	0.219	SM1
Phypoly-transcript-11934	2.46183e-23	0.708387	0.975	0.812	3.72228e-19	0	HM13_MOUSE	GO:0004190|GO:0016021	4121	Phypoly-transcript-11934	0.163	SM1
Phypoly-transcript-02327	5.61508e-20	0.707804	0.975	0.882	8.49001e-16	0	SPY_ARATH	GO:0005515|GO:0005515|GO:0005515	TPR repeat profile.|TPR repeat region circular profile.|Tetratricopeptide repeat	Phypoly-transcript-02327	0.093	SM1
Phypoly-transcript-16794	7.57202e-26	0.707736	0.98	0.777	1.14489e-21	0	PSA3_ACACA	GO:0004298|GO:0005839|GO:0051603|GO:0004175|GO:0006511|GO:0019773|GO:0004175|GO:0006511|GO:0019773|GO:0004298	Proteasome subunit|Proteasome subunit A N-terminal signature|Proteasome alpha-type subunits signature.|Proteasome alpha-type subunit profile.	Phypoly-transcript-16794	0.203	SM1
Phypoly-transcript-17142	2.17573e-21	0.707703	0.975	0.772	3.2897e-17	0	KAD2_DICDI	GO:0004017|GO:0005524|GO:0006139|GO:0019205	Adenylate kinase, active site lid|Adenylate kinase signature.	Phypoly-transcript-17142	0.203	SM1
Phypoly-transcript-10956	2.3279e-25	0.707569	0.98	0.832	3.51979e-21	0	CC14A_HUMAN	GO:0006470|GO:0008138|GO:0004725|GO:0016311|GO:0016791|GO:0016311|GO:0016791	Dual specificity phosphatase, catalytic domain|Tyrosine specific protein phosphatases active site.|Tyrosine specific protein phosphatases family profile.	Phypoly-transcript-10956	0.148	SM1
Phypoly-transcript-14425	2.3248e-16	0.707304	0.888	0.734	3.51509e-12	0	RL28_GLUDA	GO:0003735|GO:0005622|GO:0005840|GO:0006412	3715	Phypoly-transcript-14425	0.154	SM1
Phypoly-transcript-03872	1.82994e-20	0.706874	0.944	0.783	2.76686e-16	0	ZW10_RAT	GO:0000775|GO:0005634|GO:0007067	711	Phypoly-transcript-03872	0.161	SM1
Phypoly-transcript-17569	7.34772e-29	0.706699	0.98	0.818	1.11098e-24	0	AIG1_MOUSE	GO:0016021	1564	Phypoly-transcript-17569	0.162	SM1
Phypoly-transcript-07501	1.02373e-22	0.706354	0.964	0.766	1.54789e-18	0	AOFA_DICDI	GO:0016491|GO:0055114	1626	Phypoly-transcript-07501	0.198	SM1
Phypoly-transcript-05277	3.04522e-21	0.706069	0.959	0.714	4.60437e-17	0	WEE1_MOUSE	GO:0004672|GO:0005524|GO:0006468|GO:0004672|GO:0005524|GO:0006468|GO:0005524|GO:0004674|GO:0006468	Protein kinase domain profile.|Protein kinase domain|Protein kinases ATP-binding region signature.|Serine/Threonine protein kinases active-site signature.	Phypoly-transcript-05277	0.245	SM1
Phypoly-transcript-02515	5.83854e-23	0.705923	0.949	0.734	8.82787e-19	0	GACJJ_DICDI	GO:0007165|GO:0005515|GO:0007165	Rho GTPase-activating proteins domain profile.|Src homology 3 (SH3) domain profile.|RhoGAP domain	Phypoly-transcript-02515	0.215	SM1
Phypoly-transcript-00331	8.52788e-29	0.70592	0.98	0.905	1.28941e-24	0	DNLI_HAEIN	GO:0003910|GO:0005524|GO:0006281|GO:0006310|GO:0003909|GO:0051103	ATP dependent DNA ligase domain|ATP-dependent DNA ligase signature 2.	Phypoly-transcript-00331	0.075	SM1
Phypoly-transcript-16427	1.28762e-14	0.7058	0.756	0.483	1.94689e-10	0	MPPD1_MOUSE	GO:0016787	597	Phypoly-transcript-16427	0.273	SM1
Phypoly-transcript-03661	6.19848e-27	0.70565	0.995	0.864	9.37209e-23	0	YH24_CAEEL	GO:0004177|GO:0005622|GO:0006508|GO:0004177|GO:0005622|GO:0006508	Cytosol aminopeptidase signature.|Cytosol aminopeptidase family, catalytic domain	Phypoly-transcript-03661	0.131	SM1
Phypoly-transcript-02855	9.03824e-22	0.705245	0.964	0.783	1.36658e-17	0	DEK1_MAIZE	GO:0005509|GO:0005509|GO:0004198|GO:0005622|GO:0006508|GO:0004198|GO:0005622|GO:0006508	EF-hand calcium-binding domain profile.|EF-hand domain|Calpain family cysteine protease|Cysteine proteinase, calpain-type, catalytic domain profile.	Phypoly-transcript-02855	0.181	SM1
Phypoly-transcript-21280	9.91435e-26	0.703677	0.98	0.893	1.49905e-21	0	DPH5_DICDI	GO:0008152|GO:0008168	4365	Phypoly-transcript-21280	0.087	SM1
Phypoly-transcript-09908	2.16151e-23	0.703579	0.924	0.728	3.2682e-19	0	noGene	GO:0003910|GO:0005524|GO:0006281|GO:0006310	383	Phypoly-transcript-09908	0.196	SM1
Phypoly-transcript-20995	3.92116e-33	0.702312	0.98	0.827	5.9288e-29	0	noGene	GO:0008237|GO:0008270|GO:0008237|GO:0008270|GO:0019370	Peptidase family M1|Leukotriene A4 hydrolase, C-terminal	Phypoly-transcript-20995	0.153	SM1
Phypoly-transcript-21501	6.13273e-29	0.702156	0.975	0.769	9.27269e-25	0	RBG2_ARATH	GO:0003676|GO:0003676	RNA recognition motif. (a.k.a. RRM, RBD, or RNP domain)|Eukaryotic RNA Recognition Motif (RRM) profile.	Phypoly-transcript-21501	0.206	SM1
Phypoly-transcript-02677	7.67775e-23	0.702104	0.954	0.78	1.16088e-18	0	GAP1_SCHPO	GO:0005096|GO:0005622|GO:0051056|GO:0005099|GO:0005622|GO:0007264|GO:0005096|GO:0005622|GO:0051056	GTPase-activator protein for Ras-like GTPase|RasGAP C-terminus|Ras GTPase-activating proteins profile.	Phypoly-transcript-02677	0.174	SM1
Phypoly-transcript-01273	9.32789e-23	0.702003	0.98	0.905	1.41038e-18	0	PKHL1_HUMAN	GO:0005515	1382	Phypoly-transcript-01273	0.075	SM1
Phypoly-transcript-02074	1.96757e-18	0.70177	0.888	0.662	2.97496e-14	0	SADA_DICDI	GO:0005515	1382	Phypoly-transcript-02074	0.226	SM1
Phypoly-transcript-07322	3.21889e-22	0.70156	0.98	0.751	4.86696e-18	0	GACX_DICDI	GO:0005515|GO:0007165|GO:0005515|GO:0007165	Trp-Asp (WD) repeats circular profile.|RhoGAP domain|WD domain, G-beta repeat|Rho GTPase-activating proteins domain profile.	Phypoly-transcript-07322	0.229	SM1
Phypoly-transcript-03836	2.60741e-20	0.701466	0.98	0.795	3.94241e-16	0	SKP1_ASPTN	GO:0006511	4140	Phypoly-transcript-03836	0.185	SM1
Phypoly-transcript-12695	4.05981e-30	0.70124	0.985	0.85	6.13843e-26	0	SODM_DICDI	GO:0004784|GO:0006801|GO:0046872|GO:0055114|GO:0004784|GO:0006801|GO:0046872|GO:0055114|GO:0004784|GO:0006801|GO:0046872|GO:0055114	Iron/manganese superoxide dismutases, alpha-hairpin domain|Iron/manganese superoxide dismutases, C-terminal domain|Manganese and iron superoxide dismutases signature.	Phypoly-transcript-12695	0.135	SM1
Phypoly-transcript-06456	3.44858e-20	0.701042	0.949	0.76	5.21425e-16	0	ERG14_ARATH	GO:0008033|GO:0050660|GO:0004506|GO:0016021|GO:0050660|GO:0055114	Glucose inhibited division protein A|Squalene epoxidase	Phypoly-transcript-06456	0.189	SM1
Phypoly-transcript-06300	1.12235e-18	0.700775	0.964	0.766	1.69699e-14	0	WDR5B_MOUSE	GO:0005515|GO:0005515|GO:0005515|GO:0005515	Trp-Asp (WD) repeats profile.|WD domain, G-beta repeat|LIS1 homology (LisH) motif profile.|Trp-Asp (WD) repeats circular profile.	Phypoly-transcript-06300	0.198	SM1
Phypoly-transcript-00997	2.54092e-27	0.699998	0.99	0.968	3.84187e-23	0	FORF_DICDI	GO:0003779|GO:0017048|GO:0030036|GO:0003779|GO:0016043	Diaphanous GTPase-binding Domain|Diaphanous FH3 Domain	Phypoly-transcript-00997	0.022	SM1
Phypoly-transcript-02542	1.09584e-16	0.699976	0.756	0.442	1.65692e-12	0	noGene	GO:0003676	3937	Phypoly-transcript-02542	0.314	SM1
Phypoly-transcript-00610	3.21462e-20	0.69971	0.954	0.798	4.8605e-16	0	DCL1_ASPOR	GO:0003723|GO:0004525|GO:0006396|GO:0003723|GO:0004525|GO:0006396|GO:0003723|GO:0004525|GO:0006396|GO:0005515|GO:0003676|GO:0004386|GO:0005524|GO:0003676|GO:0005524|GO:0008026|GO:0003676|GO:0004386|GO:0005524|GO:0016891|GO:0016891	Ribonuclease III family domain profile.|Ribonuclease III family signature.|Ribonuclease III domain|PAZ domain profile.|Helicase conserved C-terminal domain|DEAD/DEAH box helicase|Superfamilies 1 and 2 helicase C-terminal domain profile.|Dicer dimerisation domain|Dicer double-stranded RNA-binding fold domain profile.	Phypoly-transcript-00610	0.156	SM1
Phypoly-transcript-10070	2.68361e-24	0.699637	0.97	0.757	4.05761e-20	0	ZC3HF_DICDI	GO:0046872	4960	Phypoly-transcript-10070	0.213	SM1
Phypoly-transcript-27709	1.97424e-25	0.699599	0.975	0.737	2.98504e-21	0	PCAF_ACIAD	GO:0008152|GO:0016747|GO:0008152|GO:0016747	Thiolases signature 2.|Thiolase, C-terminal domain	Phypoly-transcript-27709	0.238	SM1
Phypoly-transcript-04738	1.37296e-20	0.699431	0.944	0.723	2.07592e-16	0	ANK1_HUMAN	GO:0005515	295	Phypoly-transcript-04738	0.221	SM1
Phypoly-transcript-17747	3.25824e-30	0.699339	0.975	0.795	4.92646e-26	0	UEV1D_ARATH	GO:0016881|GO:0016881	Ubiquitin-conjugating enzyme|Ubiquitin-conjugating enzymes family profile.	Phypoly-transcript-17747	0.18	SM1
Phypoly-transcript-00301	5.47591e-20	0.69869	0.985	0.908	8.27958e-16	0	SIN3B_MOUSE	GO:0005634|GO:0006355|GO:0005634|GO:0006355	Paired amphipathic helix repeat|PAH domain profile.	Phypoly-transcript-00301	0.077	SM1
Phypoly-transcript-26011	1.89138e-12	0.698552	0.787	0.526	2.85976e-08	0	noGene	GO:0008440	2195	Phypoly-transcript-26011	0.261	SM1
Phypoly-transcript-01015	1.23151e-26	0.698202	0.97	0.896	1.86204e-22	0	UBE3A_HUMAN	GO:0004842|GO:0004842	HECT domain profile.|HECT-domain (ubiquitin-transferase)	Phypoly-transcript-01015	0.074	SM1
Phypoly-transcript-08628	6.45132e-24	0.698098	0.954	0.717	9.7544e-20	0	ENTP8_CHICK	GO:0016787|GO:0016787	GDA1/CD39 (nucleoside phosphatase) family|GDA1/CD39 family of nucleoside phosphatases signature.	Phypoly-transcript-08628	0.237	SM1
Phypoly-transcript-10866	2.72221e-21	0.697141	0.964	0.801	4.11598e-17	0	ADPRM_ORYSJ	GO:0016787	597	Phypoly-transcript-10866	0.163	SM1
Phypoly-transcript-14435	1.31494e-25	0.697125	0.954	0.679	1.98819e-21	0	RIB7_ARCFU	GO:0008703|GO:0009231|GO:0055114	3685	Phypoly-transcript-14435	0.275	SM1
Phypoly-transcript-04596	4.39032e-22	0.696635	0.954	0.85	6.63817e-18	0	FXL20_HUMAN	GO:0006457|GO:0016272|GO:0051082	3208	Phypoly-transcript-04596	0.104	SM1
Phypoly-transcript-05316	6.91835e-29	0.696463	0.975	0.803	1.04605e-24	0	Y0670_DICDI	GO:0004672|GO:0005524|GO:0006468|GO:0004672|GO:0005524|GO:0006468|GO:0004674|GO:0005524|GO:0006468|GO:0005515|GO:0004674|GO:0006468	Protein kinase domain|Protein kinase domain profile.|AGC-kinase C-terminal domain profile.|C2 domain|Serine/Threonine protein kinases active-site signature.	Phypoly-transcript-05316	0.172	SM1
Phypoly-transcript-01319	4.35249e-24	0.696427	0.97	0.855	6.58097e-20	0	NGAP_DICDI	GO:0005515|GO:0005515	C2 domain profile.|C2 domain	Phypoly-transcript-01319	0.115	SM1
Phypoly-transcript-30574	8.45334e-27	0.696207	0.975	0.76	1.27815e-22	0	ARPC3_DICDI	GO:0005856|GO:0005885|GO:0030833|GO:0034314	354	Phypoly-transcript-30574	0.215	SM1
Phypoly-transcript-03668	2.63102e-26	0.696197	0.975	0.795	3.9781e-22	0	GCN5_ORYSJ	GO:0008080|GO:0005515|GO:0008080|GO:0005515|GO:0004402|GO:0005634|GO:0006355	Acetyltransferase (GNAT) domain|Bromodomain|Gcn5-related N-acetyltransferase (GNAT) domain profile.|Bromodomain profile.|PCAF (P300/CBP-associated factor) N-terminal domain	Phypoly-transcript-03668	0.18	SM1
Phypoly-transcript-09224	4.43833e-19	0.695553	0.975	0.74	6.71075e-15	0	AP4M_ARATH	GO:0005515|GO:0006886|GO:0016192|GO:0030131	151	Phypoly-transcript-09224	0.235	SM1
Phypoly-transcript-22651	3.33915e-30	0.695497	0.98	0.749	5.04879e-26	0	CALM_PHYPO	GO:0005509|GO:0005509	EF-hand calcium-binding domain profile.|EF-hand domain pair	Phypoly-transcript-22651	0.231	SM1
Phypoly-transcript-05860	1.42418e-24	0.695231	0.98	0.861	2.15336e-20	0	S28A1_RAT	GO:0005415|GO:0006810|GO:0016020	2651	Phypoly-transcript-05860	0.119	SM1
Phypoly-transcript-29003	2.77595e-21	0.695118	0.975	0.775	4.19724e-17	0	GSTA2_BOVIN	GO:0005515|GO:0005515	Soluble glutathione S-transferase N-terminal domain profile.|Glutathione S-transferase, N-terminal domain	Phypoly-transcript-29003	0.2	SM1
Phypoly-transcript-17186	1.16767e-21	0.69477	0.904	0.723	1.76552e-17	0	PPIA_ECOLI	GO:0003755|GO:0006457|GO:0003755|GO:0006457	Cyclophilin type peptidyl-prolyl cis-trans isomerase/CLD|Cyclophilin-type peptidyl-prolyl cis-trans isomerase domain profile.	Phypoly-transcript-17186	0.181	SM1
Phypoly-transcript-14691	4.60511e-25	0.694548	0.975	0.757	6.96293e-21	0	RAA1E_ARATH	GO:0005525|GO:0007264	3588	Phypoly-transcript-14691	0.218	SM1
Phypoly-transcript-24402	1.10852e-13	0.694535	0.761	0.494	1.67608e-09	0	UFM1_RAT	GO:0003872|GO:0005945|GO:0006096|GO:0003872|GO:0005945|GO:0006096	Phosphofructokinase signature.|Phosphofructokinase	Phypoly-transcript-24402	0.267	SM1
Phypoly-transcript-01607	2.14696e-22	0.694296	0.995	0.948	3.2462e-18	0	GXCDD_DICDI	GO:0005515|GO:0005089|GO:0035023|GO:0005089|GO:0035023	IQ motif profile.|Dbl homology (DH) domain profile.|RhoGEF domain	Phypoly-transcript-01607	0.047	SM1
Phypoly-transcript-07511	1.55942e-24	0.694168	0.975	0.847	2.35784e-20	0	UBQL_DICDI	GO:0005515|GO:0005515|GO:0005515	Ubiquitin family|UBA/TS-N domain|Ubiquitin domain profile.	Phypoly-transcript-07511	0.128	SM1
Phypoly-transcript-07058	1.2926e-23	0.693994	0.954	0.737	1.95441e-19	0	KCTD9_HUMAN	GO:0051260	553	Phypoly-transcript-07058	0.217	SM1
Phypoly-transcript-15289	1.08163e-15	0.693926	0.716	0.399	1.63543e-11	0	Y1345_METJA	GO:0005515|GO:0005515	TPR repeat profile.|TPR repeat region circular profile.	Phypoly-transcript-15289	0.317	SM1
Phypoly-transcript-17248	5.70923e-25	0.693922	0.97	0.772	8.63236e-21	0	NDUS7_DICDI	GO:0051536|GO:0055114|GO:0008137|GO:0048038|GO:0051539|GO:0055114	NADH ubiquinone oxidoreductase, 20 Kd subunit|Respiratory-chain NADH dehydrogenase 20 Kd subunit signature.	Phypoly-transcript-17248	0.198	SM1
Phypoly-transcript-30249	1.43028e-13	0.693663	0.787	0.535	2.16259e-09	0	GPX1_SCHPO	GO:0004602|GO:0006979|GO:0055114|GO:0004602|GO:0006979|GO:0055114	Glutathione peroxidase|Glutathione peroxidase profile.	Phypoly-transcript-30249	0.252	SM1
Phypoly-transcript-09455	2.60534e-22	0.693487	0.975	0.737	3.93927e-18	0	MVD1_DICDI	GO:0005524	1767	Phypoly-transcript-09455	0.238	SM1
Phypoly-transcript-14574	3.64751e-15	0.693202	0.873	0.63	5.51504e-11	0	N6MT2_CHICK	GO:0003676|GO:0008168|GO:0032259	2624	Phypoly-transcript-14574	0.243	SM1
Phypoly-transcript-15101	1.50302e-15	0.693132	0.599	0.26	2.27256e-11	0	AMZ2_RAT	GO:0008270	2946	Phypoly-transcript-15101	0.339	SM1
Phypoly-transcript-02775	1.69747e-22	0.692831	0.985	0.867	2.56657e-18	0	ASTE1_DANRE	GO:0004518|GO:0006281	4913	Phypoly-transcript-02775	0.118	SM1
Phypoly-transcript-01529	7.21535e-27	0.692284	0.975	0.884	1.09096e-22	0	TOP1_DICDI	GO:0003677|GO:0003918|GO:0006265|GO:0003677|GO:0003917|GO:0005694|GO:0006265	Eukaryotic DNA topoisomerase I, catalytic core|Eukaryotic DNA topoisomerase I, DNA binding fragment	Phypoly-transcript-01529	0.091	SM1
Phypoly-transcript-04644	1.01784e-21	0.692166	0.944	0.668	1.53898e-17	0	S47A2_MOUSE	GO:0006855|GO:0015238|GO:0015297|GO:0016020|GO:0055085	2424	Phypoly-transcript-04644	0.276	SM1
Phypoly-transcript-02938	4.1179e-17	0.692142	0.888	0.711	6.22626e-13	0	DNLI_HAEIN	GO:0003910|GO:0005524|GO:0006281|GO:0006310	383	Phypoly-transcript-02938	0.177	SM1
Phypoly-transcript-23373	1.0407e-16	0.691964	0.838	0.621	1.57354e-12	0	NAT8B_HUMAN	GO:0008080|GO:0008080	Acetyltransferase (GNAT) family|Gcn5-related N-acetyltransferase (GNAT) domain profile.	Phypoly-transcript-23373	0.217	SM1
Phypoly-transcript-11652	1.4231e-25	0.691938	0.985	0.757	2.15173e-21	0	ADHX_SPAAU	GO:0016491|GO:0055114|GO:0008270|GO:0016491|GO:0055114|GO:0008270|GO:0016491|GO:0055114	Alcohol dehydrogenase GroES-like domain|Zinc-containing alcohol dehydrogenases signature.|Zinc-binding dehydrogenase	Phypoly-transcript-11652	0.228	SM1
Phypoly-transcript-01522	9.27927e-23	0.691919	0.985	0.942	1.40303e-18	0	GCP3_XENLA	GO:0000226|GO:0000922|GO:0005815	4195	Phypoly-transcript-01522	0.043	SM1
Phypoly-transcript-10670	1.67398e-25	0.691532	0.995	0.861	2.53106e-21	0	LRLA_DICDI	GO:0004888|GO:0007166|GO:0016020|GO:0004930|GO:0007186|GO:0016021	G-protein coupled receptors family 2 profile 2.|7 transmembrane receptor (Secretin family)	Phypoly-transcript-10670	0.134	SM1
Phypoly-transcript-09317	3.04682e-14	0.691451	0.766	0.454	4.60679e-10	0	CIPB_EMENI	GO:0008270|GO:0016491|GO:0055114|GO:0016491|GO:0055114	Zinc-binding dehydrogenase|Alcohol dehydrogenase GroES-like domain	Phypoly-transcript-09317	0.312	SM1
Phypoly-transcript-08254	9.48253e-24	0.69139	0.975	0.844	1.43376e-19	0	CDKC1_ORYSJ	GO:0004672|GO:0005524|GO:0006468|GO:0004672|GO:0005524|GO:0006468|GO:0004674|GO:0006468	Protein kinase domain profile.|Protein kinase domain|Serine/Threonine protein kinases active-site signature.	Phypoly-transcript-08254	0.131	SM1
Phypoly-transcript-10100	2.99733e-14	0.69128	0.807	0.526	4.53196e-10	0	BCS1B_DICDI	GO:0005524	426	Phypoly-transcript-10100	0.281	SM1
Phypoly-transcript-06994	1.80143e-16	0.691068	0.934	0.815	2.72376e-12	0	PP2C1_PARTE	GO:0003824	3432	Phypoly-transcript-06994	0.119	SM1
Phypoly-transcript-12708	1.09579e-23	0.690728	0.893	0.581	1.65684e-19	0	RAD1_MOUSE	GO:0005634|GO:0006281	3631	Phypoly-transcript-12708	0.312	SM1
Phypoly-transcript-11846	8.3089e-15	0.69057	0.721	0.419	1.25631e-10	0	SSH3_RAT	GO:0006470|GO:0008138|GO:0006470|GO:0008138|GO:0016311|GO:0016791|GO:0004725|GO:0016311|GO:0016791	Dual specificity phosphatase, catalytic domain|Dual specificity protein phosphatase family profile.|Tyrosine specific protein phosphatases family profile.|Tyrosine specific protein phosphatases active site.	Phypoly-transcript-11846	0.302	SM1
Phypoly-transcript-18249	3.26676e-16	0.690303	0.873	0.624	4.93934e-12	0	CYNS1_POPTR	GO:0009439	922	Phypoly-transcript-18249	0.249	SM1
Phypoly-transcript-08821	8.62419e-24	0.690103	0.98	0.861	1.30398e-19	0	NDUA9_DICDI	GO:0008831|GO:0045226	3874	Phypoly-transcript-08821	0.119	SM1
Phypoly-transcript-02790	4.0172e-24	0.690072	0.98	0.87	6.07401e-20	0	noGene	GO:0005515	1532	Phypoly-transcript-02790	0.11	SM1
Phypoly-transcript-00351	2.61477e-26	0.690028	0.848	0.46	3.95353e-22	0	CABIN_HUMAN	GO:0005515	4454	Phypoly-transcript-00351	0.388	SM1
Phypoly-transcript-08635	6.34847e-20	0.689674	0.964	0.769	9.59889e-16	0	UCKA_DICDI	GO:0005524|GO:0008152|GO:0016301	3073	Phypoly-transcript-08635	0.195	SM1
Phypoly-transcript-28717	4.54032e-18	0.688733	0.853	0.514	6.86497e-14	0	Y9130_DICDI	GO:0016491|GO:0055114	1626	Phypoly-transcript-28717	0.339	SM1
Phypoly-transcript-06711	2.73745e-19	0.688687	0.939	0.728	4.13902e-15	0	TTC6_HUMAN	GO:0005515|GO:0005515|GO:0005515	TPR repeat profile.|Tetratricopeptide repeat|TPR repeat region circular profile.	Phypoly-transcript-06711	0.211	SM1
Phypoly-transcript-09220	2.08216e-22	0.688616	0.614	0.199	3.14823e-18	0	noGene	GO:0046872	4959	Phypoly-transcript-09220	0.415	SM1
Phypoly-transcript-10706	9.56934e-25	0.688221	0.964	0.743	1.44688e-20	0	PP1R7_DICDI	GO:0005515|GO:0005515	Leucine-rich repeat profile.|Leucine Rich Repeat	Phypoly-transcript-10706	0.221	SM1
Phypoly-transcript-29694	4.80565e-10	0.688038	0.543	0.301	7.26614e-06	0	noGene	GO:0004556|GO:0005509|GO:0016052	1188	Phypoly-transcript-29694	0.242	SM1
Phypoly-transcript-29756	0.00326352	0.688025	0.234	0.145	1	0	CSRP1_COTJA	GO:0008270|GO:0008270|GO:0008270	LIM domain|LIM zinc-binding domain signature.|LIM domain profile.	Phypoly-transcript-29756	0.089	SM1
Phypoly-transcript-16007	5.82468e-20	0.687809	0.929	0.63	8.80691e-16	0	BL1S5_DICDI	GO:0030133|GO:0031083	2821	Phypoly-transcript-16007	0.299	SM1
Phypoly-transcript-10446	6.15804e-24	0.687678	0.975	0.705	9.31095e-20	0	CYSP1_HOMAM	GO:0006508|GO:0008234	2883	Phypoly-transcript-10446	0.27	SM1
Phypoly-transcript-06166	2.86811e-20	0.687406	0.934	0.777	4.33658e-16	0	MAO2_ARATH	GO:0004471|GO:0051287|GO:0055114|GO:0004471|GO:0055114|GO:0004471|GO:0055114	Malic enzyme, NAD binding domain|Malic enzymes signature.|Malic enzyme, N-terminal domain	Phypoly-transcript-06166	0.157	SM1
Phypoly-transcript-21247	1.44129e-20	0.687341	0.98	0.858	2.17922e-16	0	VATD_DICDI	GO:0042626	402	Phypoly-transcript-21247	0.122	SM1
Phypoly-transcript-05746	1.43821e-25	0.686793	0.985	0.913	2.17458e-21	0	SYRC_DICDI	GO:0000166|GO:0004812|GO:0005524|GO:0006418|GO:0000166|GO:0004814|GO:0005524|GO:0005737|GO:0006420|GO:0004814|GO:0005524|GO:0006420|GO:0000166|GO:0004814|GO:0005524|GO:0006420	Aminoacyl-transfer RNA synthetases class-I signature.|Arginyl tRNA synthetase N terminal domain|DALR anticodon binding domain|tRNA synthetases class I (R)	Phypoly-transcript-05746	0.072	SM1
Phypoly-transcript-11430	2.60256e-17	0.686646	0.949	0.734	3.93507e-13	0	GMDS_DICDI	GO:0003824|GO:0044237|GO:0050662	2657	Phypoly-transcript-11430	0.215	SM1
Phypoly-transcript-01609	5.27718e-27	0.68661	0.888	0.517	7.9791e-23	0	KCMA1_CHICK	GO:0005216|GO:0006811|GO:0016020|GO:0055085|GO:0006813|GO:0015269|GO:0016020	Ion transport protein|Calcium-activated BK potassium channel alpha subunit	Phypoly-transcript-01609	0.371	SM1
Phypoly-transcript-01250	2.55664e-19	0.686448	0.939	0.763	3.86564e-15	0	CHD1L_HUMAN	GO:0003676|GO:0004386|GO:0005524|GO:0003676|GO:0004386|GO:0005524|GO:0003677|GO:0005524	Helicase conserved C-terminal domain|Superfamilies 1 and 2 helicase C-terminal domain profile.|SNF2 family N-terminal domain	Phypoly-transcript-01250	0.176	SM1
Phypoly-transcript-03731	9.6622e-26	0.686058	0.98	0.882	1.46092e-21	0	CTSR3_HUMAN	GO:0005216|GO:0006811|GO:0016020|GO:0055085	2221	Phypoly-transcript-03731	0.098	SM1
Phypoly-transcript-01636	1.21031e-21	0.685566	0.985	0.948	1.82999e-17	0	SR140_HUMAN	GO:0003723|GO:0006396|GO:0003676|GO:0003723|GO:0006396|GO:0003676	SURP motif repeat profile.|Eukaryotic RNA Recognition Motif (RRM) profile.|Surp module|RNA recognition motif. (a.k.a. RRM, RBD, or RNP domain)	Phypoly-transcript-01636	0.037	SM1
Phypoly-transcript-12360	8.99144e-18	0.685548	0.822	0.538	1.35951e-13	0	PTAR1_DANRE	GO:0008318|GO:0018342|GO:0008318|GO:0018342	Protein prenyltransferases alpha subunit repeat profile.|Protein prenyltransferase alpha subunit repeat	Phypoly-transcript-12360	0.284	SM1
Phypoly-transcript-04368	5.88859e-23	0.68547	0.98	0.858	8.90355e-19	0	M3K7_MOUSE	GO:0003950|GO:0004672|GO:0006468|GO:0004672|GO:0005524|GO:0006468	Poly(ADP-ribose) polymerase catalytic domain|Protein tyrosine kinase|Protein kinase domain profile.	Phypoly-transcript-04368	0.122	SM1
Phypoly-transcript-00292	1.07554e-22	0.685209	0.959	0.867	1.62621e-18	0	VINC_DICDI	GO:0005198|GO:0007155|GO:0015629	4832	Phypoly-transcript-00292	0.092	SM1
Phypoly-transcript-10784	1.87896e-16	0.684799	0.853	0.618	2.84098e-12	0	ALG3_DICDI	GO:0005783|GO:0016021|GO:0016758	212	Phypoly-transcript-10784	0.235	SM1
Phypoly-transcript-02675	6.84936e-21	0.684314	0.929	0.749	1.03562e-16	0	DJC21_HUMAN	GO:0046872|GO:0046872	Zinc finger C2H2 type domain signature.|Zinc finger C2H2 type domain profile.	Phypoly-transcript-02675	0.18	SM1
Phypoly-transcript-18996	3.88002e-09	0.683662	0.65	0.428	5.86658e-05	0	JOS2_HUMAN	GO:0008242|GO:0008242	Josephin domain profile.|Josephin	Phypoly-transcript-18996	0.222	SM1
Phypoly-transcript-12333	3.09403e-27	0.683341	0.975	0.702	4.67818e-23	0	UBE2Z_XENLA	GO:0016881|GO:0016881	Ubiquitin-conjugating enzyme|Ubiquitin-conjugating enzymes family profile.	Phypoly-transcript-12333	0.273	SM1
Phypoly-transcript-12118	1.67686e-14	0.683245	0.848	0.636	2.53542e-10	0	GYAR_THEPD	GO:0008152|GO:0016616|GO:0051287|GO:0055114|GO:0016616|GO:0048037|GO:0055114|GO:0016616|GO:0048037|GO:0055114|GO:0016616|GO:0048037|GO:0055114|GO:0016616|GO:0048037|GO:0055114	D-isomer specific 2-hydroxyacid dehydrogenase, catalytic domain|D-isomer specific 2-hydroxyacid dehydrogenases signature 2.|D-isomer specific 2-hydroxyacid dehydrogenases signature 3.|D-isomer specific 2-hydroxyacid dehydrogenase, NAD binding domain|D-isomer specific 2-hydroxyacid dehydrogenases NAD-binding signature.	Phypoly-transcript-12118	0.212	SM1
Phypoly-transcript-10764	1.81999e-24	0.683091	0.975	0.789	2.75183e-20	0	IP6K3_MOUSE	GO:0008440	2195	Phypoly-transcript-10764	0.186	SM1
Phypoly-transcript-26963	8.21606e-30	0.682696	0.975	0.769	1.24227e-25	0	NH2L1_XENTR	GO:0030529|GO:0042254	3781	Phypoly-transcript-26963	0.206	SM1
Phypoly-transcript-18525	5.75711e-11	0.682477	0.832	0.601	8.70474e-07	0	GEFF_DICDI	GO:0005085|GO:0005622|GO:0051056|GO:0005085|GO:0005622|GO:0051056	Ras guanine-nucleotide exchange factors N-terminal domain profile.|RasGEF N-terminal motif	Phypoly-transcript-18525	0.231	SM1
Phypoly-transcript-07697	1.78558e-18	0.682212	0.954	0.853	2.69979e-14	0	EXD1_MOUSE	GO:0003676|GO:0006139|GO:0008408	39	Phypoly-transcript-07697	0.101	SM1
Phypoly-transcript-09201	1.16287e-18	0.682176	0.904	0.653	1.75827e-14	0	AMACR_MOUSE	GO:0003824|GO:0008152	811	Phypoly-transcript-09201	0.251	SM1
Phypoly-transcript-15690	5.29382e-24	0.682087	0.975	0.884	8.00426e-20	0	NCS1_PONAB	GO:0005097|GO:0032313|GO:0005509|GO:0005097|GO:0032313	Rab-GTPase-TBC domain|EF-hand calcium-binding domain profile.|TBC/rab GAP domain profile.	Phypoly-transcript-15690	0.091	SM1
Phypoly-transcript-02757	1.03734e-21	0.68203	0.98	0.832	1.56846e-17	0	ZSWM2_MOUSE	GO:0008270	4985	Phypoly-transcript-02757	0.148	SM1
Phypoly-transcript-06922	1.75022e-22	0.681951	0.98	0.815	2.64633e-18	0	ZN277_HUMAN	GO:0046872|GO:0046872	Zinc finger C2H2 type domain signature.|Zinc finger C2H2 type domain profile.	Phypoly-transcript-06922	0.165	SM1
Phypoly-transcript-05902	2.15288e-16	0.681671	0.888	0.714	3.25515e-12	0	DNLI_HAEIN	GO:0003910|GO:0005524|GO:0006281|GO:0006310	383	Phypoly-transcript-05902	0.174	SM1
Phypoly-transcript-26493	2.51839e-15	0.681622	0.817	0.569	3.80781e-11	0	TPPC4_DICDI	GO:0005801|GO:0006888	4315	Phypoly-transcript-26493	0.248	SM1
Phypoly-transcript-10584	4.0336e-22	0.681595	0.98	0.775	6.09881e-18	0	SIPL1_ARATH	GO:0004190|GO:0016021	4121	Phypoly-transcript-10584	0.205	SM1
Phypoly-transcript-04598	4.83154e-22	0.681472	0.914	0.653	7.30529e-18	0	LIMKA_DICDI	GO:0004674|GO:0006468|GO:0004672|GO:0005524|GO:0006468|GO:0004672|GO:0006468	Serine/Threonine protein kinases active-site signature.|Protein kinase domain profile.|Protein tyrosine kinase	Phypoly-transcript-04598	0.261	SM1
Phypoly-transcript-08863	1.45341e-23	0.681456	0.975	0.887	2.19755e-19	0	FOLD2_ARATH	GO:0003824|GO:0009396|GO:0055114|GO:0003824|GO:0004488|GO:0009396|GO:0055114|GO:0003824|GO:0004488|GO:0009396|GO:0055114	Tetrahydrofolate dehydrogenase/cyclohydrolase signature 2.|Tetrahydrofolate dehydrogenase/cyclohydrolase, catalytic domain|Tetrahydrofolate dehydrogenase/cyclohydrolase, NAD(P)-binding domain	Phypoly-transcript-08863	0.088	SM1
Phypoly-transcript-22450	8.23392e-15	0.681367	0.772	0.497	1.24497e-10	0	noGene	GO:0030472|GO:0042729|GO:0072686|GO:0030472|GO:0042729|GO:0072686	DASH complex subunit Dad1|DASH complex subunit Dad4	Phypoly-transcript-22450	0.275	SM1
Phypoly-transcript-07200	1.44747e-16	0.681109	0.893	0.717	2.18857e-12	0	PCTL_MOUSE	GO:0008289|GO:0008289	START domain profile.|START domain	Phypoly-transcript-07200	0.176	SM1
Phypoly-transcript-04707	7.4226e-18	0.681071	0.934	0.711	1.1223e-13	0	DNLI_HAEIN	GO:0003910|GO:0005524|GO:0006281|GO:0006310	383	Phypoly-transcript-04707	0.223	SM1
Phypoly-transcript-18049	1.23015e-15	0.681033	0.69	0.361	1.85999e-11	0	noGene	GO:0005515	295	Phypoly-transcript-18049	0.329	SM1
Phypoly-transcript-21879	7.36367e-15	0.681026	0.822	0.546	1.11339e-10	0	YFMJ_BACSU	GO:0008270|GO:0016491|GO:0055114	5000	Phypoly-transcript-21879	0.276	SM1
Phypoly-transcript-12321	1.87578e-26	0.680995	0.964	0.737	2.83618e-22	0	noGene	GO:0016998	2375	Phypoly-transcript-12321	0.227	SM1
Phypoly-transcript-10922	9.97037e-26	0.680499	0.929	0.618	1.50752e-21	0	SEC4_CANAX	GO:0005525|GO:0007264	3588	Phypoly-transcript-10922	0.311	SM1
Phypoly-transcript-04623	5.65982e-28	0.680103	0.98	0.795	8.55764e-24	0	ARI1_DROME	GO:0005515|GO:0008270|GO:0008270|GO:0005515|GO:0008270	Ring finger domain|IBR domain|Zinc finger RING-type profile.	Phypoly-transcript-04623	0.185	SM1
Phypoly-transcript-08827	4.58295e-17	0.67978	0.868	0.705	6.92942e-13	0	PRMA_THEMA	GO:0005509|GO:0005509|GO:0005509	EF hand|EF-hand domain pair|EF-hand calcium-binding domain profile.	Phypoly-transcript-08827	0.163	SM1
Phypoly-transcript-12560	1.89612e-12	0.679624	0.711	0.431	2.86693e-08	0	FBXW7_DROME	GO:0005515	1532	Phypoly-transcript-12560	0.28	SM1
Phypoly-transcript-01048	3.03339e-23	0.679606	0.985	0.928	4.58648e-19	0	VPS39_HUMAN	GO:0006886|GO:0016192|GO:0005083|GO:0005083|GO:0006886|GO:0016192	Clathrin heavy-chain (CHCR) repeat profile.|CNH domain|Citron homology (CNH) domain profile.|Region in Clathrin and VPS	Phypoly-transcript-01048	0.057	SM1
Phypoly-transcript-03888	1.87976e-23	0.679597	0.98	0.827	2.84219e-19	0	NOXA_DICDI	GO:0016491|GO:0055114|GO:0016491|GO:0055114|GO:0016491|GO:0055114	Ferredoxin reductase-type FAD binding domain profile.|FAD-binding domain|Ferric reductase NAD binding domain	Phypoly-transcript-03888	0.153	SM1
Phypoly-transcript-16398	2.92943e-25	0.678315	0.975	0.754	4.4293e-21	0	NDUS8_PONAB	GO:0051536|GO:0051536	4Fe-4S dicluster domain|4Fe-4S ferredoxin-type iron-sulfur binding domain profile.	Phypoly-transcript-16398	0.221	SM1
Phypoly-transcript-21217	4.30319e-13	0.678021	0.817	0.572	6.50642e-09	0	YJHQ_ECOLI	GO:0008080	109	Phypoly-transcript-21217	0.245	SM1
Phypoly-transcript-00843	6.94629e-29	0.677217	0.995	0.908	1.05028e-24	0	UBP13_ARATH	GO:0005515|GO:0005515|GO:0008270|GO:0005515|GO:0007165|GO:0005622|GO:0008270|GO:0005515|GO:0007165|GO:0005515	MATH/TRAF domain profile.|Zinc finger RING-type profile.|TIR domain profile.|B-box zinc finger|TIR domain|MATH domain	Phypoly-transcript-00843	0.087	SM1
Phypoly-transcript-06914	3.33328e-24	0.677128	0.97	0.803	5.03992e-20	0	LAP3_ARTOC	GO:0006508|GO:0008233	2940	Phypoly-transcript-06914	0.167	SM1
Phypoly-transcript-17448	7.85444e-17	0.677079	0.954	0.792	1.18759e-12	0	VAM7B_DICDI	GO:0016021|GO:0016192|GO:0016021|GO:0016192	v-SNARE coiled-coil homology domain profile.|Synaptobrevin	Phypoly-transcript-17448	0.162	SM1
Phypoly-transcript-24963	3.90491e-22	0.676966	0.975	0.717	5.90422e-18	0	Y8111_DICDI	GO:0003677	1313	Phypoly-transcript-24963	0.258	SM1
Phypoly-transcript-02837	2.25905e-26	0.676912	0.995	0.829	3.41568e-22	0	Y4UC_RHISN	GO:0008152|GO:0016491|GO:0055114|GO:0008152|GO:0016491|GO:0055114	Aldehyde dehydrogenases glutamic acid active site.|Aldehyde dehydrogenase family	Phypoly-transcript-02837	0.166	SM1
Phypoly-transcript-25300	8.89904e-18	0.676175	0.893	0.653	1.34554e-13	0	AB14C_ARATH	GO:0005524|GO:0016887|GO:0005524|GO:0016887|GO:0005524|GO:0016887|GO:0005524|GO:0006810|GO:0016021|GO:0042626|GO:0055085|GO:0005524|GO:0006810|GO:0016021|GO:0042626|GO:0055085	ABC transporter|ATP-binding cassette, ABC transporter-type domain profile.|ABC transporters family signature.|ABC transporter transmembrane region|ABC transporter integral membrane type-1 fused domain profile.	Phypoly-transcript-25300	0.24	SM1
Phypoly-transcript-09586	6.68066e-24	0.675962	0.97	0.827	1.01012e-19	0	noGene	GO:0005261|GO:0015672|GO:0016020	4555	Phypoly-transcript-09586	0.143	SM1
Phypoly-transcript-11159	4.50997e-28	0.67585	0.98	0.792	6.81908e-24	0	CGL_DICDI	GO:0030170	935	Phypoly-transcript-11159	0.188	SM1
Phypoly-transcript-03652	4.13834e-27	0.675373	0.985	0.925	6.25716e-23	0	noGene	GO:0038032|GO:0038032	RGS domain profile.|Regulator of G protein signaling domain	Phypoly-transcript-03652	0.06	SM1
Phypoly-transcript-12418	5.01211e-28	0.675228	0.959	0.749	7.57831e-24	0	RAD2A_ARATH	GO:0005525|GO:0007264	3588	Phypoly-transcript-12418	0.21	SM1
Phypoly-transcript-10991	2.04641e-14	0.675128	0.827	0.592	3.09417e-10	0	noGene	GO:0005525|GO:0005622|GO:0007264	2501	Phypoly-transcript-10991	0.235	SM1
Phypoly-transcript-07615	6.94086e-28	0.67463	0.97	0.772	1.04946e-23	0	C734A_ARATH	GO:0005506|GO:0016705|GO:0020037|GO:0055114	974	Phypoly-transcript-07615	0.198	SM1
Phypoly-transcript-03820	1.54081e-16	0.673412	0.898	0.711	2.32971e-12	0	DNLI_HAEIN	GO:0003910|GO:0005524|GO:0006281|GO:0006310|GO:0003910|GO:0005524|GO:0006281|GO:0006310	ATP-dependent DNA ligase family profile.|ATP dependent DNA ligase domain	Phypoly-transcript-03820	0.187	SM1
Phypoly-transcript-01780	7.20714e-24	0.673336	0.98	0.893	1.08972e-19	0	T2EB_DICDI	GO:0005515|GO:0005515	Trp-Asp (WD) repeats circular profile.|WD domain, G-beta repeat	Phypoly-transcript-01780	0.087	SM1
Phypoly-transcript-10110	1.63064e-17	0.673149	0.924	0.645	2.46553e-13	0	ELOA1_RAT	GO:0005634|GO:0006355|GO:0016021	3896	Phypoly-transcript-10110	0.279	SM1
Phypoly-transcript-13239	6.60967e-22	0.673079	0.98	0.772	9.99382e-18	0	SDHB_DICDI	GO:0051537|GO:0051536|GO:0009055|GO:0051536|GO:0009055|GO:0051536	2Fe-2S ferredoxin-type iron-sulfur binding region signature.|4Fe-4S ferredoxin-type iron-sulfur binding domain profile.|2Fe-2S ferredoxin-type iron-sulfur binding domain profile.|2Fe-2S iron-sulfur cluster binding domain	Phypoly-transcript-13239	0.208	SM1
Phypoly-transcript-08287	1.81025e-21	0.672892	0.939	0.766	2.7371e-17	0	PUR8_DICDI	GO:0003824|GO:0004018|GO:0006188	Fumarate lyases signature.|Adenylosuccinate lyase C-terminal	Phypoly-transcript-08287	0.173	SM1
Phypoly-transcript-01717	2.92352e-18	0.672743	0.944	0.801	4.42037e-14	0	GBA2_MOUSE	GO:0004348|GO:0006665|GO:0016021	3428	Phypoly-transcript-01717	0.143	SM1
Phypoly-transcript-04376	2.18694e-24	0.672729	0.97	0.783	3.30665e-20	0	ASNS_DICDI	GO:0008152|GO:0004066|GO:0006529	Glutamine amidotransferase domain|Asparagine synthase	Phypoly-transcript-04376	0.187	SM1
Phypoly-transcript-02889	1.0659e-15	0.672602	0.919	0.708	1.61165e-11	0	PIF1_HUMAN	GO:0004386|GO:0005524|GO:0000723|GO:0003678|GO:0006281	Helicase|PIF1-like helicase	Phypoly-transcript-02889	0.211	SM1
Phypoly-transcript-09405	1.10198e-18	0.672563	0.949	0.717	1.66619e-14	0	THOC3_ARATH	GO:0005515|GO:0005515|GO:0005515	Trp-Asp (WD) repeats profile.|Trp-Asp (WD) repeats circular profile.|WD domain, G-beta repeat	Phypoly-transcript-09405	0.232	SM1
Phypoly-transcript-03528	1.55042e-21	0.672237	0.898	0.514	2.34423e-17	0	SIR2B_DICDI	GO:0005515|GO:0070403|GO:0005515	Ankyrin repeat profile.|Sir2 family|Ankyrin repeat	Phypoly-transcript-03528	0.384	SM1
Phypoly-transcript-00538	7.81147e-19	0.672097	0.939	0.832	1.18109e-14	0	CCAR1_HUMAN	GO:0005509	1376	Phypoly-transcript-00538	0.107	SM1
Phypoly-transcript-19775	2.18762e-21	0.671925	0.888	0.523	3.30768e-17	0	FKBP2_YARLI	GO:0006457|GO:0006457	FKBP-type peptidyl-prolyl cis-trans isomerase domain profile.|FKBP-type peptidyl-prolyl cis-trans isomerase	Phypoly-transcript-19775	0.365	SM1
Phypoly-transcript-20662	6.2665e-10	0.671759	0.579	0.35	9.47495e-06	0	noGene	GO:0016787	2794	Phypoly-transcript-20662	0.229	SM1
Phypoly-transcript-04763	2.91051e-22	0.671394	0.944	0.763	4.4007e-18	0	Y8969_DICDI	GO:0003824|GO:0016614|GO:0050660|GO:0055114|GO:0008762|GO:0016491|GO:0050660|GO:0055114|GO:0016491|GO:0050660|GO:0055114	PCMH-type FAD-binding domain profile.|FAD binding domain|Berberine and berberine like	Phypoly-transcript-04763	0.181	SM1
Phypoly-transcript-12122	2.3219e-14	0.67117	0.766	0.477	3.51072e-10	0	CENPO_CHICK	GO:0000776|GO:0034508	705	Phypoly-transcript-12122	0.289	SM1
Phypoly-transcript-22529	1.04815e-17	0.671075	0.914	0.65	1.5848e-13	0	TAF10_MOUSE	GO:0005634|GO:0006352	4490	Phypoly-transcript-22529	0.264	SM1
Phypoly-transcript-11647	1.31977e-26	0.670809	0.954	0.711	1.99549e-22	0	GRLE_DICDI	GO:0004672|GO:0006468|GO:0005524|GO:0004672|GO:0005524|GO:0006468|GO:0004674|GO:0006468	Protein tyrosine kinase|Protein kinases ATP-binding region signature.|Protein kinase domain profile.|Serine/Threonine protein kinases active-site signature.	Phypoly-transcript-11647	0.243	SM1
Phypoly-transcript-05629	6.25156e-22	0.670767	0.949	0.772	9.45237e-18	0	ACSM5_RAT	GO:0003824|GO:0008152	277	Phypoly-transcript-05629	0.177	SM1
Phypoly-transcript-09032	5.62948e-23	0.67021	0.939	0.757	8.51177e-19	0	NHLC2_CHICK	GO:0005515	2703	Phypoly-transcript-09032	0.182	SM1
Phypoly-transcript-05634	8.57257e-22	0.669917	0.939	0.795	1.29617e-17	0	CYB2_HANAN	GO:0020037|GO:0020037|GO:0010181|GO:0016491|GO:0055114|GO:0016491|GO:0016491|GO:0055114|GO:0020037	Cytochrome b5-like Heme/Steroid binding domain|Cytochrome b5 family, heme-binding domain profile.|FMN-dependent alpha-hydroxy acid dehydrogenase domain profile.|FMN-dependent dehydrogenase|FMN-dependent alpha-hydroxy acid dehydrogenases active site.|Cytochrome b5 family, heme-binding domain signature.	Phypoly-transcript-05634	0.144	SM1
Phypoly-transcript-08642	5.87659e-16	0.669529	0.741	0.41	8.8854e-12	0	HIF1N_DANRE	GO:0005515	2248	Phypoly-transcript-08642	0.331	SM1
Phypoly-transcript-02883	6.15404e-12	0.66922	0.751	0.483	9.30491e-08	0	SCY2_DICDI	GO:0004672|GO:0005524|GO:0006468|GO:0004672|GO:0005524|GO:0006468	Protein kinase domain|Protein kinase domain profile.	Phypoly-transcript-02883	0.268	SM1
Phypoly-transcript-07765	9.19742e-21	0.668911	0.964	0.815	1.39065e-16	0	noGene	GO:0005337|GO:0006810|GO:0016021	2783	Phypoly-transcript-07765	0.149	SM1
Phypoly-transcript-03805	5.14454e-20	0.668091	0.888	0.572	7.77855e-16	0	LIPK_MOUSE	GO:0006629	2890	Phypoly-transcript-03805	0.316	SM1
Phypoly-transcript-00876	1.50857e-19	0.668087	0.929	0.728	2.28096e-15	0	ALA2_ARATH	GO:0000166|GO:0046872	1357	Phypoly-transcript-00876	0.201	SM1
Phypoly-transcript-04125	7.95192e-24	0.667791	0.98	0.893	1.20233e-19	0	AMPKA_DICDI	GO:0004674|GO:0006468|GO:0005524|GO:0004672|GO:0005524|GO:0006468|GO:0004672|GO:0005524|GO:0006468	Serine/Threonine protein kinases active-site signature.|Protein kinases ATP-binding region signature.|Protein kinase domain profile.|Protein kinase domain	Phypoly-transcript-04125	0.087	SM1
Phypoly-transcript-07563	6.88506e-19	0.667658	0.944	0.789	1.04102e-14	0	D2HDH_ARATH	GO:0008762|GO:0016491|GO:0050660|GO:0055114|GO:0003824|GO:0016614|GO:0050660|GO:0055114|GO:0003824|GO:0050660	FAD binding domain|PCMH-type FAD-binding domain profile.|FAD linked oxidases, C-terminal domain	Phypoly-transcript-07563	0.155	SM1
Phypoly-transcript-29994	0.0029519	0.667405	0.122	0.052	1	0	ADC_CLOBB	GO:0016831	100	Phypoly-transcript-29994	0.07	SM1
Phypoly-transcript-14697	2.89354e-16	0.66737	0.959	0.775	4.37504e-12	0	noGene	GO:0051087|GO:0005515	BAG domain|Ubiquitin family	Phypoly-transcript-14697	0.184	SM1
Phypoly-transcript-29766	4.30233e-24	0.66698	0.944	0.708	6.50513e-20	0	RAB7A_DICDI	GO:0005525|GO:0007264	3588	Phypoly-transcript-29766	0.236	SM1
Phypoly-transcript-19165	1.14323e-21	0.666798	0.858	0.5	1.72857e-17	0	MFSD1_DANRE	GO:0016021|GO:0055085	2392	Phypoly-transcript-19165	0.358	SM1
Phypoly-transcript-14907	1.40491e-21	0.666753	0.959	0.725	2.12422e-17	0	EMC2A_XENLA	GO:0005515|GO:0005515	TPR repeat profile.|TPR repeat region circular profile.	Phypoly-transcript-14907	0.234	SM1
Phypoly-transcript-07669	1.78629e-23	0.66672	0.975	0.844	2.70087e-19	0	CP2U1_BOVIN	GO:0016705|GO:0055114|GO:0005506|GO:0016705|GO:0020037|GO:0055114	Cytochrome P450 cysteine heme-iron ligand signature.|Cytochrome P450	Phypoly-transcript-07669	0.131	SM1
Phypoly-transcript-26433	1.15656e-16	0.666652	0.873	0.627	1.74872e-12	0	PIN4_BOVIN	GO:0016853|GO:0016853	PpiC-type peptidyl-prolyl cis-trans isomerase family profile.|PPIC-type PPIASE domain	Phypoly-transcript-26433	0.246	SM1
Phypoly-transcript-10838	2.00311e-18	0.665886	0.954	0.795	3.02871e-14	0	UFD1_DROME	GO:0006511	4683	Phypoly-transcript-10838	0.159	SM1
Phypoly-transcript-01883	3.97177e-22	0.665322	0.888	0.512	6.00531e-18	0	DNLI_HAEIN	GO:0003910|GO:0005524|GO:0006281|GO:0006310	383	Phypoly-transcript-01883	0.376	SM1
Phypoly-transcript-01535	9.60796e-22	0.665318	0.954	0.795	1.45272e-17	0	GXCDD_DICDI	GO:0005515|GO:0000221|GO:0015991|GO:0046961|GO:0005515|GO:0005089|GO:0035023|GO:0005089|GO:0035023	Armadillo/beta-catenin-like repeat|V-ATPase subunit H|Armadillo/plakoglobin ARM repeat profile.|Dbl homology (DH) domain profile.|RhoGEF domain	Phypoly-transcript-01535	0.159	SM1
Phypoly-transcript-01785	3.68092e-24	0.665032	0.98	0.896	5.56555e-20	0	GCSP_DICDI	GO:0004375|GO:0006546|GO:0055114	1828	Phypoly-transcript-01785	0.084	SM1
Phypoly-transcript-03789	5.95274e-20	0.665024	0.959	0.858	9.00055e-16	0	DNLI_HAEIN	GO:0003910|GO:0005524|GO:0006281|GO:0006310|GO:0003909|GO:0051103	ATP dependent DNA ligase domain|ATP-dependent DNA ligase signature 2.	Phypoly-transcript-03789	0.101	SM1
Phypoly-transcript-08993	1.65997e-24	0.664856	0.914	0.653	2.50987e-20	0	EAA1_CAEEL	GO:0006835|GO:0016020|GO:0017153	4177	Phypoly-transcript-08993	0.261	SM1
[truncated: 9,854 more rows]

## Sheet: SM1-4_ClusterMarker_Fig2s1H
gene	p_val	avg_log2FC	pct.1	pct.2	p_val_adj	cluster	UniProt_Acc	ID	plasmodium
Phypoly-transcript-07720	1.77522e-78	8.43965	1	0.98	4.93173e-74	0	TBAN_PHYPO	Phypoly-transcript-07720	SM1
Phypoly-transcript-11405	6.55648e-82	8.33146	0.974	0.417	1.82146e-77	0	CDK1_DICDI	Phypoly-transcript-11405	SM1
[truncated: 27,544 more rows]

## Sheet: SM1-4_SM1-2vs3-4_Marker_Fig2s1D
gene	p_val	avg_logFC	pct.1	pct.2	p_val_adj	UniProt_Acc	GOterm	Domain	ID	diff	SM
[truncated: 6,755 more rows]

[truncated: 22 more sheets: SM1-4_Harmony_Cluster_Fig2s1E, SM1-4_CCA_Cluster_Fig2s1E, SM1_ClusterMarker_Fig2F, SM2_ClusterMarker_Fig2s1K, SM3_ClusterMarker_Fig2s1L, SM4_ClusterMarker_Fig2G, SM1_GOseq_enrichment_Fig2s3B, SM2_GOseq_enrichment_Fig2s3D, SM3_GOseq_enrichment_Fig2s3F, SM4_GOseq_enrichment_Fig2s3H, T1_ClusterMarker_Fig2s2, T2_ClusterMarker_Fig2s2, T3_ClusterMarker_Fig2s2, Primary_ClusterMarker_Fig3B, Primary_ClusterMarker_Fig3s1F, Secondary_ClusterMarker_Fig3E, Secondary_ClusterMarker_Fig3s1G, Prime_GOseq_enrichment_Fig3s1G, Second_GOseq_enrichment_Fig3s1H, Amoeba_Cluster_Marker_Fig4E …]
